# Supplementary material for: Proximity Profiling of the CFTR Interaction Landscape in Response to Orkambi
Source: Int J Mol Sci. 2022 Feb 23;23(5):2442. doi: 10.3390/ijms23052442 (PMC8910062; doi:10.3390/ijms23052442)
Supplement: Supplementary file 1 [file ijms-23-02442-s001.zip]

Archive with 8 entries (8 files):
- SuppDataset1.xlsx
- SuppDataset2_NEW.xlsx
- SuppDataset3.xlsx
- SuppDataset4.xlsx
- SuppDataset5.xlsx
- SuppDataset6.xlsx
- SuppDataset7_NEW.xlsx
- Supplementary Figures.pdf
