# Supplementary material for: Proximity Profiling of the CFTR Interaction Landscape in Response to Orkambi
Source: Int J Mol Sci. 2022 Feb 23;23(5):2442. doi: 10.3390/ijms23052442 (PMC8910062; doi:10.3390/ijms23052442)
Supplement: Supplementary file 1 [file ijms-23-02442-s001.zip › SuppDataset1.xlsx]

## Sheet: GO
WT BFDR < 0.01
Transporter Activity	SLC6A8	ATP1B1	SLC12A6	ATP1B3	SLC25A19	ATP9A	MMGT1	CACHD1	SLC30A1	VAT1	FLVCR1	OSBPL9	SLC12A7	CNNM4	CNNM3	ATP6V0A2	ABCB7	ATP6V0C	SLC6A15	ATP1A1	MCU	SLC7A5	KPNA2	SLC29A1	SLC25A24	PLSCR3	SLC27A4	CLCC1	SLC12A2	ANO6	SLC33A1	PRAF2	ATP5F1	ATP5H	SLC25A20	MPV17	SLC9A1	SLC1A3	SLC1A4	SLC30A6	ATP6V1F	SLC25A12	ARL6IP5	SLC23A2	ATP7A	TOMM20	ABCB10	ABCB1	SLC12A4
Vesicle Mediated Transport	RAB11FIP1	PICALM	RAB27A	AP1G1	STXBP1	STX6	EHD1	VPS33B	TMED10	SAR1A	PREB	SYS1	GOPC	TRAPPC6B	TMEM115	BCAP31	RAB3B	SAR1B	EXOC5	VPS45	SNX17	VAMP8	STX12	STXBP3	SNX3	ARFRP1	EPN1	LLGL1	NAPA	RAB11FIP5	ARL13B	FCHO2	GDI2	EXOC3	TMED5	AP4S1	CHMP6	STX18	FLOT1	RALA	RAB11FIP2	RAB3IP	STX5	STX3	VAMP7	SNAP23	VTA1	TMEM87A	STX10
Plasma Membrane	C11orf2	TULP3	ARFIP1	SLC9A3R2	PARD6B	NOTCH2	LYSMD3	TNFRSF10B	RCN1	FAM158A	VANGL1	SOAT1	GNA13	ATP6AP2	EPHA3	VMA21	EFR3A	DAG1	HLA-A	VANGL2	TFRC	APPL2	LYN	FCGRT	STEAP3	RAB23	ADCY9	EPHA2	ATP6AP1	APPL1	LEMD2	AGPAT1	CCDC115	RABL3	DERL1	ALG3	CLGN	LMTK2	PTRF	EBP	SEC11A	SCAMP1	PPAP2B	SLC9A3R1	TMEM85	DOLPP1	EFR3B	SEMA4C	UQCRFS1
Cell Adhesion	HSPD1	DSG2	PODXL	BSG	FERMT2	SRC	ITGB1	CD44	CTNND1	PVRL2	DSC2	CDH2	DLG3	CLDN1	DLG1	KIRREL	JUP	PPFIBP1	F11R	GSK3B	ITGA7	ALCAM	ITGA2	ITGAV	ITGA6	MCAM	ITGA5	CDH2
Scaffold Protein	CASK	SPRY4	LRRC8A	LRRC8D	C1orf226	ELMOD3	BAIAP2L1	NUMB	AUP1	NOS1AP	BAIAP2	MPP7
∆F508-CFTR Fold Change
Plasma Membrane	TFRC	ITGB1	HN1	PDIA3	BTF3	BTN3A3	ARFIP1	SLC9A3R2	CPNE8	PICALM	MFN2	RCN1	CISD2	FCRL3	STX6	ATP5J	SNCA	VANGL2	EHD1	RHOT1	PREB	APPL2	SYS1	SEC24C	AP2A2	CHMP5	RFT1	SGTA	EPB41L3	STEAP3	ADCY9	RAB23	EPHA2	PDCD10	VPS45	ATP6AP1	PODXL	STEAP2	SDCBP	RABL3	LIMA1	SLC9A3R1	SEMA4C	SLK	CTSE	OCRL	TSPAN3	SNAP29	ATG2B
Transporter Activity	SLC6A8	ATP9A	SLC25A19	GLUD2	KPNA1	SLC6A6	ATP6V1A	SLC6A15	GRIN2B	PLS1	SLC48A1	ABCA3	SFXN4	PLS3	HBA2	SLC12A2	ANO6	OSBPL2	GLUD1	ABCC4	SLC7A2	SLC38A2	RANBP6	SLC4A7	ABCB1	ATP6V0A1
Golgi Apparatus	SCAMP1	TMEM87A	GOLPH3	FAM91A1	RER1	GORASP2
Juntion	PDLIM5	DSG2	MLLT4	SCRIB	DST	STX12	FERMT2	PDLIM1	DBNL	TLN1	CTNND1	STX10	DSC2	RAB3D	RIMS2	SYPL2	STX7	SRC	ITGA2	ITGAV	ITGA6	ITGA5	OCLN
Scaffold Protein	ENAH	DEPDC1B	LRRC8D	MPP1	APPL1	CHORDC1	SNX6	C1orf226	CYFIP1	SNX1	YWHAB	NOS1AP	CAP1	HP1BP3	PDZD8	YWHAZ
Cytoskeletal	TWF1	KLC1	DCTN2	TUBB2B	CFL2	TUBB2A	NUDCD2	ARPC4	ACTR1A	TPM3	FIGNL1	MYL12A	ACTA1	KIF5B	CNN3	TUBA1A	CAPZA2	CTNNA1	EZR	TUBA1C	CNN2	ACTA2
Vesicle Mediated Transport	RAB11FIP1	VPS4B	VAMP8	EPS15L1	CHMP4B	GDI2	EXOC3	EPS15	RAB11FIP2	VAMP7	SNAP23	STAM	VAMP2	VAMP3	AP3S1	EHD3	STX16	EXOC4	SMAP1	CLINT1	STAM2	AP2B1
Chaperone	TXNDC5	DNAJC10	AIP	COX11	TBCE	PFDN5	VBP1	DNAJC8
Endplasmic Reticulum	EI24	KDELR1	HSD17B7	C19orf6	ALG1	CERS2	ERGIC2	CALU	CNIH4	ACSL4
∆F508-CFTR + MG132 Fold Change
Plasma Membrane	IGF1R	IL1RAP	IL18R1	OR8S1	STX8	SNCA	TMED10	BCAP31	STX12	PTRF	SNAP23	SNAP47	BET1	STX16	EXOC4	GOSR1	PEX5	ERC1	FMR1	STRN3	PLEKHG5	CAMK2B	PARD3	KIAA0586	HIP1	ALB	CAMK2G	MYO1B	RAB8A	IFT81	PPAT	HLA-A	HLA-B	HN1	ADAM8	GNB1	NDUFS8	GNA11	NDUFA10	CYCS	FAM115A	UQCRQ	EFHA1	PGK1	CD63	HRAS	AIG1	MTMR6	C1orf27
Transporter Activity	RYR2	ATP6V1E1	TMCO1	ATP1B3	SLC25A19	SLC25A22	OSBP2	VAT1	SLC25A15	TRPM7	ATP6V1A	PITPNB	ATP1A3	SFXN4	APOB	SLC25A10	ITPR1	ANO6	BAX	CMC1	TIMM23B	P2RX4	SLC7A2	SLC25A20	LETMD1	TM9SF4	TPR	RANBP9	ATP6	MTCH2	NUP107	TM9SF3	NUP210L	SLC25A12
Golgi Apparatus	COG2	EPT1	COG7	OPTN	SCAMP1	RAB31	CEPT1	MAN1A2	RAB2B	GORASP2
Juntion	JUP	PXN	LPP	DSP	DST	PDLIM1	PDLIM3	PVRL2	CCDC85C	OCLN	itga5
Scaffold Protein	LRRC49	COPS8	AKAP12	CKS2	SWAP70	NUMBL	ABI1	MMS19	KIAA0368	BTRC	ASCC3	TDRKH	DLG5	RGPD6	CYFIP1	TTC28	RRBP1	MPP5	AUP1	GAB2	DAP3	MPP2
Cytoskeletal	KIF5A	KANK2	CLASP1	MAPRE2	LCP1	TUBB2A	NUDCD2	KIF4A	ACTA1	ACTL6A	ACTR10	KIF20B	ACTR3	SUN1	KIF14	TUBB4A	CKAP2	TUBGCP2	MACF1	TUBA3D	CEP63	CTNNA1	DYNC1LI2	TUBB3	TUBA1C	ACTA2	TPGS1	EML4	MARCKS	TMEM201	AURKA	WDR73	MZT2B
Vesicle Mediated Transport	AP2A1	AP2A2	FCHO2	ITSN1	ITSN2	RABEP1	VPS37A	ANXA11	RAB9A	SPAG1	ZFYVE16	ARFGAP3	RAB4A	VPS37B	RAB7A	GRIP1	EXOC2	PACSIN2	TBC1D20	RAE1
Chaperone	PPIL3	DNAJA4	NDUFAF2	TXNDC5	AIP	PDIA3	PPIL2	MNF1	DNAJC2	VBP1	DNAJB11	ATPAF2	DCTN1
Endplasmic Reticulum	RCN1	AGPAT3	PIGK	DERL1	INPP5F	GOLT1B	SQLE	CALU	ALG9	ERO1L
WT BFDR < 0.01
BioGRID	A2M	ABCB10	ABCB7	AIFM1	ATP2B4	ATP5H	AUP1	BCAP31	BSG	CAV1	COPB2	CTNNA1	DERL1	EHD1	ESYT1	ESYT2	EXOC4	FLOT2	GARS	GDI2	GOPC	HSD17B4	HSPB1	HSPD1	IDH3A	ITCH	ITGA2	ITGB1	KIF5C	KPNA2	LRBA	PLD3	PYGL	RAB3B	RCN1	RHOT1	RPS12	SACM1L	SAR1A	SCAMP2	SDHA	SLC25A12	SLC25A24	SLC4A7	SLC9A3R1	SLC9A3R2	SNAP23	SNX27	SPTAN1
[truncated: 60 more columns]
