# Supplementary material for: Proximity Profiling of the CFTR Interaction Landscape in Response to Orkambi
Source: Int J Mol Sci. 2022 Feb 23;23(5):2442. doi: 10.3390/ijms23052442 (PMC8910062; doi:10.3390/ijms23052442)
Supplement: Supplementary file 1 [file ijms-23-02442-s001.zip › SuppDataset2_NEW.xlsx]

## Sheet: Sheet1
INTERACTOME AUTHOR	OVERLAP	PREY NAME
Hutt Iazzi McDonald Pankow Reilly	1	ESYT2
Hutt Iazzi McDonald Reilly	1	FLOT2
Hutt McDonald Pankow Reilly	16	ACTN4
		IPO9
		ACSL3
		LMO7
		LMNB1
		CPNE1
		ACTN1
		MYO1B
		MYO1C
		PRDX1
		LIMA1
		MYH11
		TPM1
		ARPC2
		MYH14
		TPM4
Hutt Iazzi Pankow Reilly	2	EHD1
		LMNA
Hutt Iazzi McDonald	7	YES1
		MAPK1
		ITCH
		DSG2
		CTBP1
		RP2
		FLOT1
Hutt McDonald Reilly	12	SVIL
		PCBP1
		RBM14
		RBM39
		MPRIP
		GNAI2
		MYO5B
		FLNC
		MYO5A
		UACA
		CFTR
		DDX3X
Hutt McDonald Pankow	48	TMEM33
		PPP1R12A
		PAWR
		PSMC4
		CTNNB1
		TMOD2
		VCP
		RPLP0
		ATP5A1
		ACTR3B
		TCEB1
		PPP2R2A
		RPL3
		XPNPEP3
		ARPC4
		MYL9
		TPM2
		ARPC5L
		XRCC5
		MYO1D
		FLII
		TMOD3
		UBR4
		ANXA1
		MSN
		PRDX6
		TAGLN2
		CAPZA2
		MYO6
		MYH9
		RAB14
		TECR
		MYL6
		MYH10
		TES
		S100A8
		YWHAB
		MARCKS
		CAPZA1
		PGRMC1
		XPO1
		TUBB6
		PPP2R1A
		DBN1
		LRRFIP2
		PABPC1
		KPNB1
		ATP2A2
Hutt Iazzi Pankow	4	HSPD1
		SDHA
		SPTAN1
		RPS12
Hutt Pankow Reilly	3	RPN1
		MCM7
		MYO1A
Iazzi McDonald Pankow	9	KPNA2
		SPTBN1
		RCN1
		SLC9A3R2
		EXOC4
		ATP2B4
		SCAMP2
		DERL1
		GARS
McDonald Pankow Reilly	5	LMNB2
		PDIA3
		FKBP8
		EMD
		TOP2A
Iazzi Pankow Reilly	3	COPB2
		VAPA
		VAPB
Hutt McDonald	114	CNBP
		DAZAP1
		THRAP3
		SPECC1L
		RPL7A
		PALLD
		GNAS
		DSTN
		TPM3
		NPM1
		LUC7L2
		PRDX4
		GNG12
		RP9
		ARPC3
		FN1
		ALYREF
		RPL10
		GANAB
		PARK7
		ATP6V1A
		IGLL5
		PRKDC
		PSMD12
		ACOT9
		ARPC1A
		UBE2L3
		RPL27
		SRSF3
		RALB
		SEC61A1
		PPP1CA
		MYO1E
		HNRNPH1
		GLO1
		FSCN1
		CFL1
		RPL18A
		SYNCRIP
		TUBA1C
		PPP1CB
		GSPT1
		IGHG1
		KRT18
		RPL9
		DDX1
		TP53
		OTUB1
		ACP1
		NONO
		KLHL26
		RPL11
		TUBB4B
		PCBP2
		GNB1
		ZNF207
		DEK
		ACTBL2
		MYL6B
		PHB
		GAPDH
		DOCK7
		CALM1
		HACD2
		SRRM2
		HNRNPA1
		CTTN
		CAPZB
		ACTR2
		SFPQ
		PDLIM7
		RPL29
		RALY
		PKLR
		KIF5B
		RPS4X
		RAI14
		ARF1
		CNN3
		RCC2
		RPS8
		TMPO
		PPP1CC
		LUC7L
		GSN
		PRPS1
		MYO18A
		PDCD2L
		RRBP1
		CSE1L
		GNB2
		EEF1A1
		ISYNA1
		TUBA4A
		PRDX3
		HNRNPF
		CALU
		HPRT1
		PSMA7
		SLC25A6
		RPL27A
		GSTM3
		ADSL
		ACTB
		CSRP2
		CANX
		CTPS2
		ATP5C1
		TXN
		HNRNPH2
		SERBP1
		EEF1G
		PFDN2
		S100A9
Hutt Iazzi	12	HSPB1
		PTRF
		GNB4
		EBP
		BSG
		SLC25A4
		SRC
		TMED10
		JUP
		CTNND1
		CMPK1
		RALA
Hutt Reilly	17	DDB1
		PSMD2
		ANXA2
		EHD4
		SMTN
		PKP3
		RPN2
		CYR61
		STT3A
		MYOF
		PCNA
		FLNB
		STRAP
		PPIA
		RAN
		NSUN2
		FLNA
Hutt Pankow	83	DARS
		ANXA3
		MYL12A
		TPI1
		HYOU1
		RPLP1
		TRIM29
		CCT8
		DYNC1H1
		RPL32
		HSPA8
		YWHAZ
		PFKL
		CCT4
		MTHFD1
		MDH2
		RPLP2
		RPL24
		IGF2BP2
		RPL28
		SLC25A11
		HSPE1
		ENO1
		PDIA6
		RPL8
		PSMA6
		SLC25A31
		RPL14
		RCN2
		ACTR3
		QARS
		DSP
		ARL1
		TGM2
		SKP1
		PCMT1
		YWHAE
		CCT2
		ATP5B
		ACTR1A
		RPS13
		RASEF
		AHCY
		PABPC3
		ATP2A1
		RPL7
		LGALS3BP
		LDHA
		EPRS
		DNAJA1
		CAP1
		GPRC5A
		SFN
		ALDOA
		CLTC
		HNRNPC
		EPPK1
		EEF2
		SERPINH1
		NPEPPS
		RPL21
		TRIM21
		PABPC1L
		HSPA9
		HSPA5
		LIMCH1
		CAD
		HNRNPM
		KLHL22
		GNB2L1
		PLEC
		HSP90B1
		GRN
		PRDX2
		VCL
		TCEB2
		MYO1G
		CCT5
		EIF3K
		PFN1
		MARS
		P4HB
		UNC45A
Iazzi McDonald	20	ATP5F1
		ESYT1
		LEMD2
		ATP6V0A2
		UBE2J1
		CCDC47
		AASS
		STX18
		TMEM115
		SRPR
		PIK3R1
		RAB7L1
		MRPL12
		HSD17B4
		PIP5K1A
		ACAD9
		SNAP23
		HSPBP1
		AUP1
		PPM1F
McDonald Reilly	15	PTCD3
		SON
		GRWD1
		CCAR2
		RCC1
		SRSF7
		XRN1
		CBX3
		PPM1G
		OAT
		TWF1
		ASPH
		ILK
		RFC2
		CKAP5
McDonald Pankow	49	SLC25A3
		SAAL1
		IPO4
		C3
		GSDMA
		TF
		RAB5B
		RANBP1
		SF3B2
		TTC27
		PSMA5
		SSR4
		SRRM1
		NAP1L1
		PYGB
		IARS
		YTHDF2
		TRIM28
		PPP2CA
		RNH1
		CAT
		EXOC7
		EIF3I
		RAB18
		IRS4
		SEC23B
		PSMA1
		IPO8
		IDH2
		HUWE1
		KIAA1524
		UBR5
		PPP2CB
		HNRNPUL1
		TP53BP1
		NUP210
		IPO7
		BAG2
		LTF
		NCAPD2
		KHSRP
		STOML2
		RAB5C
		ALOX12B
		PPP2R2D
		MDN1
		PSMC3
		DAAM1
		TUBB1
Iazzi Reilly	10	MARK3
		ETFA
		STX5
		MARK2
		NUMB
		STT3B
		AP1G1
		EPHA2
		MYEF2
		RAB7A
Iazzi Pankow	15	ABCB7
		A2M
		SLC9A3R1
		LRBA
		ITGA2
		SLC25A24
		HRNR
		CTNNA1
		AIFM1
		C20orf3
		IDH3A
		SNX27
		SACM1L
		CAV1
		SSBP1
Pankow Reilly	7	IMMT
		SFXN1
		MCM4
		ACSL4
		CYTSA
		SMC4
		LAMA5
Hutt	354	RPS11
		RPS17
		GAPDHS
		ECHS1
		TKT
		PFKP
		RPS18
		RPL19
		GNAL
		DDX5
		UBB
		HNRNPCL4
		RPS5
		ITGA3
		IGHG4
		IGLC7
		RPL35
		OGDH
		ALDOC
		BCLAF1
		RAD23B
		HIST1H1E
		RPS4Y2
		HIST1H2AD
		RPS28
		PTK2
		TUBB
		IGHG2
		YWHAQ
		HSP90AB2P
		LDHB
		THAP1
		MYO5C
		ACOT7
		EZR
		ANXA8L2
		MOB4
		HIST1H1A
		GSTP1
		RPRD1B
		ANXA2P2
		RPL4
		ALPP
		PPIAL4C
		GOT2
		CLTCL1
		VMP1
		RDX
		CSRP1
		PHB2
		PXN
		IGLC3
		DDX39A
		PGAM1
		NEDD4L
		TCP1
		ANXA8
		SET
		THY1
		POTEJ
		CORO1C
		CASP14
		RPS29
		EIF5A
		HNRNPK
		NT5E
		PARP4
		FAM129B
		IPO5
		ACLY
		MCM5
		RPL17
		HSP90AA5P
		ERH
		HNRNPCL1
		TUFM
		MFI2
		RPS4Y1
		HIST1H2AG
		PLS3
		EIF3H
		CLIC1
		PKP2
		LRRFIP1
		HIST2H2AC
		DDX50
		SSFA2
		DOCK6
		CHTOP
		MMTAG2
		CCT7
		EEF1A2
		TRIP6
		YBX1
		AK1
		IGLC6
		IQGAP3
		DCTN4
		CALML5
		MYL12B
		SRP14
		TUBB2B
		NAMPT
		RPS6
		PRPS1L1
		HNRNPA2B1
		RPS10
		SAMHD1
		PTBP3
		IGKC
		BLVRA
		MYL3
		RAB6A
		CAPN2
		CBR3
		HIST1H2AJ
		DNPEP
		RPL15
		DDX3Y
		RPS3A
		CFL2
		GBP1
		BOD1L1
		RPL34
		DYNLL1
		CTPS1
		NUDC
		EIF2S3L
		AKR1B1
		HSP90AB1
		ARF5
		CCT3
		TRIOBP
		HIST1H2AC
		NCL
		ARPC1B
		HIST2H2AA3
		TCEA1
		RAB32
		DDX21
		IGHG3
		HADHB
		ADAR
		MTPN
		RAC3
		CYSRT1
		HIST1H2AB
		H2AFV
		RAP2A
		SLC25A10
		IGLC2
		HSPA7
		EPS8L2
		RPS27L
		GSTZ1
		LCP1
		CSTB
		PPIAL4E
		RAB39A
		RAP2C
		TUBB8
		S100A7
		SBSN
		CALD1
		DDX39B
		RPL31
		RPL10L
		RPS25
		WRNIP1
		HIST1H1D
		HIST2H2AB
		HLA-C
		PGAM2
		PSME2
		SERPINB3
		HIST1H1C
		HIST1H4A
		SYNM
		TECPR1
		ACTG1
		MAPK4
		HINT1
		HNRNPU
		RPL38
		RPS16
		RPS9
		EEA1
		MYBBP1A
		HNRNPA1L2
		CCT6A
		SF3B3
		SHMT2
		PDLIM5
		HMGB1
		IQGAP2
		ACTR3C
		RPL10A
		EIF6
		PPIAL4A
		RAC1
		SSH2
		CDH13
		TUBAL3
		YBX2
		SQSTM1
		BIN3
		RAC2
		CD55
		RPS23
		HNRNPCL2
		FBXO22
		UCHL1
		NEDD4
		LGALS1
		UBQLN4
		SLC25A5
		PRTFDC1
		RPL12
		COPA
		COPG1
		XRCC6
		RPS27A
		RPS3
		GDI1
		PTGES3
		RPSA
		TAPBP
		TOM1L2
		CORO1B
		RPS2
		HIST3H2A
		DYNLL2
		EIF2S3
		RPLP0P6
		PLEKHG3
		PLS1
		SDC4
		KRT87P
		NAA50
		HSPA6
		RAB6B
		RPS26
		PABPC1L2A
		EIF5A2
		ALPPL2
		CDC42
		HSPA1A
		MYL1
		U2AF1
		PFKM
		S100A6
		RPL6
		H2AFZ
		ILF3
		H2AFX
		RPL30
		AIMP2
		KPNA5
		CCDC62
		CTCF
		KPNA1
		PRNP
		PSMC1
		FAF2
		TRIP13
		S100A11
		RAP2B
		EIF5AL1
		HMGB2
		ECI2
		PTBP1
		C9orf114
		MVP
		CASP3
		HSP90AA1
		CCDC68
		DHX9
		RPS15
		TAGLN
		HNRNPCL3
		HIST1H1B
		H2AFJ
		TUBB2A
		RPL36
		UBE2S
		CD59
		ATP6V1B2
		AHSA1
		MAPK6
		NUP188
		RPS20
		MTG2
		HACD3
		HIST1H1T
		GSPT2
		RPS15A
		SERPINB4
		HNRNPDL
		RPL3L
		IQGAP1
		DCTPP1
		PPIAL4D
		IGLC1
		AIMP1
		UBA52
		EHD3
		MAPK3
		RPL18
		U2AF1L4
		H1FX
		RPS19
		FBL
		SETSIP
		DST
		S100A10
		RPL13
		KLHDC10
		RPL23
		HIST1H2AH
		SERPINE1
		FAM83D
		CTBP2
		ALS2CL
		MEST
		PLCD3
		PKM
		HSPA1B
		PGAM4
		HSP90AB3P
		TJP2
		CDCP1
		ARF3
		PEX19
		YBX3
		MIF
		PSMA8
		S100A7A
		F3
		TMSB4X
		PPA1
		KPNA6
		PDIA4
		RPS14
		HNRNPL
		IGKV4-1
		OGDHL
		ATP6V1B1
		RPS26P11
		EEF1A1P5
		MAT2A
		TUBB4A
		UBC
		CBR1
		RPS27
McDonald	407	TFIP11
		BYSL
		PDCL3
		HOMEZ
		DCAF5
		IMP4
		RGN
		ARL2
		CD2BP2
		MAP3K3
		LONP1
		ANP32E
		YEATS4
		ARL6IP1
		PUF60
		LSM12P1
		INTS6
		KIAA0528
		NUDT1
		ACBD3
		PPP3CA
		TIAL1
		CEP170
		APOE
		FBXO31
		SRSF6
		GRB2
		SORT1
		USP7
		ADI1
		GMPPA
		PXDN
		C9orf16
		CDC42BPA
		NIPBL
		EIF3M
		LSM4
		GNA11
		TAF10
		AKR1B15
		CDK17
		LOC102724023
		LSM12
		DNAJA3
		TMED9
		WDR12
		CCDC172
		CIP2A
		LOC107984053
		OSGEP
		TAB1
		MRPS24
		GAA
		RBBP6
		NCOA3
		FTH1
		PACSIN3
		HNRNPA0
		IKBKG
		DDI2
		RNF7
		PGM1
		SNRPC
		PSMD8
		HSPA2
		SPAG9
		TAF9
		ENO2
		BCL7A
		NEFL
		GALNT2
		NKAP
		SRGAP2C
		GIGYF2
		PRMT1
		CUL3
		CAND2
		EPB41L3
		XRCC1
		DERL2
		MAIP1
		MRPL11
		BIRC2
		POP4
		CHPF2
		PLOD2
		RAVER1
		CALM2
		GPD1L
		MRPL37
		NDUFV2
		ZC3H14
		WNT16
		SNW1
		IRF2BPL
		GHDC
		PES1
		TNRC6B
		HDDC2
		C4B
		INPP5K
		GSR
		INPPL1
		BUB3
		PDCD6
		CDC27
		FAM3C
		GPC4
		ALDH1L1
		PPP1R13L
		BPGM
		HMOX1
		FAM207A
		MAN1A1
		PYCR3
		EIF4E
		U2AF2
		SEC16A
		ATP5J2
		MTFR2
		F13A1
		MFGE8
		PNMA2
		G3BP2
		DPM1
		C19orf70
		CLASP1
		ZNF706
		SLC25A17
		CCNQ
		SKIV2L2
		CPSF6
		PRPF8
		AMMECR1L
		TIMM23
		G6PD
		UBL5
		ESS2
		SRP54
		F10
		BCKDHA
		THBS1
		TTI1
		FAM156A
		KIAA1967
		PDE7A
		SART1
		TUBGCP4
		TSPYL1
		PSMD10
		METTL26
		NUDT16L1
		GGCX
		DGCR14
		TM9SF2
		RHOG
		UNC50
		C21orf33
		NUP107
		DNAJB2
		PTPLB
		LUC7L3
		EMC6
		L3HYPDH
		DHRS4
		RSPRY1
		ARL6IP4
		PRPSAP2
		UBE2E2
		IQSEC3
		BAG4
		F5
		MAGOH
		S100PBP
		EXO1
		CDKN2C
		AKAP8
		SARNP
		FAM54A
		HAX1
		POLD1
		LCAT
		HMGCS1
		MRPL23
		ORC4
		C2orf47
		EIF3CL
		CERS6
		UBTF
		ANXA7
		ARCN1
		POLR2E
		AMOT
		LOC101060545
		NAT1
		SELENOT
		C1orf86
		GEMIN5
		DDX20
		NUDT21
		BTAF1
		TRADD
		CPSF2
		MTFR1
		MMS19
		GPHN
		RAE1
		NDUFB1
		TAF5L
		MRPL4
		NUFIP2
		MATR3
		RDH13
		SMARCC2
		NDUFAF3
		TPD52L2
		DPYSL2
		CCDC50
		ILF2
		FUBP3
		ARHGEF12
		MRPS34
		PLCG1
		DAP3
		YTHDF3
		SRPRA
		PM20D2
		MARK1
		LSM14A
		CHEK1
		MRPS11
		NUP153
		CSDE1
		EFHD1
		FAM133B
		PAG1
		APMAP
		APOB
		EFTUD2
		CS
		MRPL54
		KRT3
		FAM156B
		TCF12
		C4A
		MMAB
		MID1
		KCTD5
		ZW10
		GRSF1
		SCAND1
		RNF20
		USP54
		PAXIP1
		RRAS2
		THTPA
		SATB2
		BHMT2
		FBLN1
		CCDC32
		PRPF6
		STOM
		DDX26B
		PRUNE
		BOLA2
		DBT
		WARS
		RBM14-RBM4
		CD2AP
		ZC3HAV1L
		CHCHD1
		PPP2R2C
		MTCH1
		VTN
		LRPPRC
		SNX2
		OSTM1
		SPECC1
		PPIB
		ALDH7A1
		VDAC3
		NDUFB6
		OSGEPL1
		DNAJC12
		OCIAD1
		SUN2
		HAUS8
		FAM173A
		DIMT1
		PRRC1
		IQCB1
		SIGMAR1
		ATAD3A
		TAF6L
		HEATR1
		FOXK1
		MRPL44
		GAR1
		LRRC47
		IGHV1OR15-1
		ELOC
		FAAP20
		C2CD5
		THOC3
		SREK1IP1
		RPIA
		NBEAL2
		CARM1
		KRT27
		CDK9
		PLCG2
		MLLT1
		ATP5L
		ATP1A2
		LGMN
		NOP56
		NUDT11
		CUL5
		AAMP
		MED17
		TPP1
		UBE2C
		C16orf13
		CLINT1
		NUP160
		EMC4
		MYCBP2
		CALML3
		FIP1L1
		RPA1
		RAB29
		LAMTOR1
		CORO1A
		C15orf57
		PPIL2
		GADD45GIP1
		RBM22
		CRBN
		ITIH2
		LRRC40
		EIF3C
		FTSJ1
		UBXN1
		SELT
		PRRC2A
		MAT1A
		CALM3
		ACIN1
		NUP54
		SRSF9
		FAM162A
		CRTC3
		CTU1
		CBY1
		RAD51D
		HTRA2
		DLD
		DNAJB12
		HMMR
		CUL2
		CACYBP
		HNRNPA3
		INTS6L
		RTKN
		PTCD1
		NDUFA9
		YAP1
		PSMD7
		SNRPB
		MORC2
		RSC1A1
		COL10A1
		YIPF5
		TCF7
		RLIM
		GTF3C1
		CTSZ
		DLAT
		C6orf47
		APOA1
		SRSF5
		PSME3
		PHF10
		LARP4B
		FAM120B
		SUPT7L
		IGHV1-2
		PARD3
		FAM58A
		PAM16
		PGD
		C2orf16
		PYCRL
		ECD
		DUSP9
		LRRC14
		SCNM1
		TNFAIP8L2-SCNM1
		MRPL53
		PRUNE1
		BOLA2B
		DPYSL3
		VDAC2
		WASF2
		PAH
		CCDC88A
		DHRS2
Iazzi	391	CD44
		DLG1
		ITGA5
		APBB2
		MMGT1
		LMAN1
		CYCS
		SLC33A1
		RAB3IP
		AGPAT1
		IGSF3
		CXADR
		RHOT1
		SLC12A4
		USE1
		EFNB1
		CLCC1
		C11orf2
		KIAA0090
		RHOC
		GHR
		EXOC3
		KIAA1715
		DHRS7
		LRRC8D
		ROR2
		FRS2
		SLC6A15
		CDIPT
		MCU
		ARL13B
		SCP2
		ALCAM
		TRAM1
		UBXN4
		RAB35
		RICTOR
		MTX1
		LRRC8A
		USP19
		USP32
		WDR20
		PLD1
		L2HGDH
		PICALM
		GPRC5C
		ATP1A1
		UBQLN2
		OPA1
		RG9MTD1
		CHMP6
		C19orf6
		SPCS3
		ARFRP1
		SCAMP3
		TOR1AIP1
		PAFAH1B3
		VRK2
		UMPS
		EEPD1
		RELL1
		ITGB1
		TUBA1A
		CPD
		ATP5H
		GNS
		PPFIBP1
		ARFGEF2
		ANO10
		VEZT
		ITGA6
		NOTCH2
		FKBP5
		PODXL
		IBA57
		UQCRQ
		POR
		VAT1
		FAM213A
		DHRS7B
		SAR1A
		DAG1
		EPN1
		FAM91A1
		GSK3B
		GNA13
		VPS37B
		KIF5C
		TBC1D10A
		SLC2A1
		EFR3B
		AGPAT6
		ATP6V1F
		SLC12A7
		FCGRT
		CD276
		PALM
		RALGAPB
		FAM83B
		PPP5C
		C14orf133
		ATP9A
		SBF1
		C19orf26
		OCLN
		USP46
		CAPNS1
		CYB5B
		APPL2
		ARHGAP1
		UFSP2
		MUT
		SLC38A3
		LRP8
		TMEM43
		ATP6V0C
		ARL6IP5
		ARFIP1
		TRNT1
		SLC30A1
		SLC6A8
		STIP1
		SLC3A2
		SLC25A20
		TMEM85
		ERO1LB
		CDK5RAP3
		MPV17
		LYSMD3
		SLC29A1
		PDHX
		CANT1
		SSR1
		OSBPL9
		RAB11FIP1
		TMEM87A
		LRRC1
		STX10
		SBDS
		ATP6AP2
		CDC42EP4
		PCYOX1L
		GLS
		SLC1A3
		SEC11A
		ACAP2
		SLC39A10
		DCXR
		ATP6V0A1
		RAB11FIP5
		LSR
		SLC7A1
		GORASP2
		ALG5
		SLC35F2
		KIRREL
		WDR48
		STXBP1
		PTPRJ
		SPRY4
		ETFB
		HADHA
		ELMOD3
		VMA21
		CLDN1
		ABCC1
		SLC27A2
		IGF2R
		CNNM3
		ITGA7
		LRRC57
		EFR3A
		VAMP7
		MLLT11
		STX6
		CDC42EP1
		LPHN2
		MAP2K3
		HSBP1
		BAIAP2
		PARD6B
		VPS45
		FNBP1
		AGPAT9
		BAIAP2L1
		TEX264
		VAMP8
		PANX1
		TMEM160
		TOMM20
		TMEM111
		TBC1D14
		PACSIN2
		CLGN
		SQRDL
		UNC5B
		EXOC5
		SDHB
		FLVCR1
		JAM3
		SLC39A14
		SMPD4
		SLC23A2
		LNPEP
		HMOX2
		MPP7
		CACHD1
		SGPL1
		ATP1B1
		MOSPD2
		BTN3A2
		PI4KA
		STEAP3
		SLC12A6
		BCAP31
		PI4K2A
		CCM2
		RAB11FIP2
		BNIP2
		TBC1D22B
		FAM135A
		CDH2
		PRAF2
		ATP7A
		DSC2
		TTC35
		STBD1
		ALG12
		SLC12A2
		EFNB3
		ABCB1
		DLG3
		MAGT1
		LLGL1
		THBD
		PEAK1
		MTHFD2
		VANGL2
		UQCRFS1
		RAB23
		NCAPG2
		ITGAV
		CLDND1
		TMEM209
		HLA-A
		DOLPP1
		AP1M1
		C8orf55
		ATP6AP1
		SLC38A2
		PPP2R5C
		MPZL1
		INPP1
		PCYOX1
		STX7
		CNNM4
		CHP
		RABGAP1
		CAMLG
		VPS33B
		TMED5
		MCAM
		CISD2
		PRDX5
		SMAD4
		SLC4A7
		GNL1
		SCARB1
		SEC22B
		TFRC
		GOPC
		GOSR1
		SOAT1
		WDFY1
		EIF2AK3
		PVRL2
		LMTK2
		MTX3
		UBE2D1
		RAB11B
		BAG6
		SLC7A2
		BTF3L4
		FERMT2
		JAG2
		STX3
		NAPA
		EPHA3
		TMEM9
		SCYL2
		NCS1
		LYN
		SCPEP1
		CDCA3
		PYGL
		DDRGK1
		SLC7A5
		PREB
		TRIM13
		DHPS
		RAB3B
		STX12
		SLC1A4
		SPG21
		SYS1
		ABCB10
		FNDC3A
		ZDHHC5
		EPHX1
		AP4S1
		SLC27A4
		LRRC4B
		EFNB2
		RAB3IL1
		SCARB2
		KIAA1549
		SLC9A1
		STEAP2
		SLC30A6
		TNFRSF10B
		PPAP2B
		BTN3A3
		SCAMP1
		SLC25A19
		CYP51A1
		SNX3
		C15orf24
		CAB39
		FAM158A
		GDI2
		KIAA1468
		COX5B
		NOS1AP
		TMX1
		CADM1
		C1orf226
		SLC30A5
		UBQLN1
		ALG3
		RABL3
		OXSR1
		SLC38A1
		GPD2
		ARFGEF1
		VANGL1
		TIMM13
		PLD3
		SPCS2
		RAB27A
		SLC25A12
		RALGAPA1
		CNP
		NNT
		TMEM93
		ST13
		F11R
		NAA25
		YKT6
		GPR89A
		TMEM199
		PPP2R5E
		TMEM2
		C19orf63
		STX16
		COX4NB
		ST7
		TULP3
		NF2
		VTA1
		PGM3
		ATP1B3
		EPB41L5
		CASK
		APPL1
		ADCY9
		ATPAF2
		CDKAL1
		STXBP3
		FCHO2
		ANO6
		GOLT1B
		FUNDC1
		GGA2
		CCDC115
		PGPEP1
		SEMA4C
		SAR1B
		TTC7B
		SNX17
		PLSCR3
		TRAPPC6B
Reilly	403	ACINU
		RAB1B
		CHD8
		RBM15
		FA83H
		ATD3A
		RUVB1
		EXOSX
		LIMC1
		TAOK3
		HERC2
		LUZP1
		GNAS2
		C1TC
		TBB2B
		SMC3
		TRI56
		RBM10
		DYSF
		GEMI4
		STAU2
		TRA2B
		DDX6L
		MSH6
		NB5R3
		CDK1
		CAN1
		H2A1
		RS27A
		SRP72
		ATPA
		IQGA1
		SMCA4
		DICER
		PRC2C
		DJC13
		PTGES
		TF3C1
		PB1
		VTNC
		PBIP1
		DHX16
		KIF2A
		NOMO1
		MYPT1
		KIF14
		NUSAP
		ERLN1
		CTND1
		AURKB
		RS21
		SSRP1
		SEC63
		DYHC1
		LS14A
		ITB4
		JPH2
		TMED7
		EZRI
		YBOX3
		RL11
		S12A6
		AKAP2
		PERQ2
		PRS7
		SKIV2
		INCE
		SPTB2
		TM9S2
		AP2B1
		SURF4
		SYFA
		TEX10
		TF3C5
		HBA
		CAD13
		ZCH18
		TCOF
		ACTG
		SENP3
		NSUN5
		H2A2C
		GTSE1
		SNF5
		SI1L3
		WDR82
		SFXN3
		1433Z
		PDLI7
		ABCAD
		KRT86
		RL37
		KIF23
		ARH40
		DHSA
		EF1G
		RL1D1
		VA0D1
		COR1C
		SMN
		ARI1A
		HMGN2
		RUVB2
		MRM1
		PLAK
		TMEDA
		ECHB
		P5CS
		POTEF
		TACD2
		COPE
		TDRD3
		TCPD
		RRP1
		DNJC9
		ODO2
		CHD2
		EF1D
		PRC1
		1B08
		ABCF1
		ARP3
		SSRD
		K2C6B
		HM13
		EPIPL
		ROA3
		KPYM
		LAT1
		PHF2
		RFC1
		H2AX
		PHLB2
		RAD50
		PAI1
		STAU1
		HBB
		RSBNL
		AT1A1
		WBS22
		NTKL
		NP1L4
		RNPS1
		RL17
		NOL7
		RB11B
		RM39
		PAIRB
		SAFB1
		KIF3A
		UBP10
		AFAD
		RM24
		RICTR
		TBA1A
		RS20
		TCPH
		TBA4A
		RL31
		TOR4A
		NUFP2
		BGH3
		GBLP
		RAB1A
		PDIP3
		SPTC1
		LEG8
		CLH1
		RT10
		CO3
		CAPR1
		LAP2A
		BAP31
		ARHG1
		RAB10
		HNRH3
		MRCKB
		KIF22
		IMB1
		DREB
		KAP0
		TPR
		RU17
		HNRPQ
		AGRIN
		RFC5
		ECHA
		KTN1
		NU205
		SYLC
		TENA
		SYAC
		PRP31
		LTV1
		SERA
		1C18
		IF4A2
		SLTM
		HS90A
		ZC3HF
		TIF1B
		GNAI3
		SC16A
		AT5F1
		PELP1
		EIF3B
		SOGA2
		RM19
		NOM1
		ASCC3
		MAGD2
		GRK6
		MTSSL
		C170B
		NUP93
		GRP75
		LRRF2
		DDX47
		IMA1
		MUC16
		EF2
		SH3B4
		DTX3L
		EXOS8
		GOGB1
		UHRF2
		H2A1D
		K6PP
		CNDH2
		SND1
		CHCH3
		NDUS1
		ROA2
		TAP1
		1C06
		TPSN
		PDIA1
		SPAS2
		RT02
		LSG1
		MP2K3
		RHOA
		SMC1A
		RBMS2
		RT29
		RUNX1
		RM22
		OST48
		KINH
		ARC1A
		SAMH1
		LAR4B
		TERA
		COX41
		OAS3
		HSP71
		AFF4
		ZO2
		INF2
		ERLN2
		XPO2
		MEPCE
		PABP2
		RN213
		DDX60
		H2A2A
		H2A1A
		DYN2
		F111B
		SPAT5
		NOP16
		MMTA2
		KIF2C
		CNDD3
		UN45A
		GTR1
		CAN2
		DX39A
		AQR
		T2EB
		CBX8
		VDAC1
		DHX37
		SYVC
		K1C19
		DDX46
		PTN1
		DLGP5
		DRG1
		KI20B
		TBL2
		ANKH1
		GTPB1
		NOMO3
		OASL
		SYMC
		KRT81
		CTNA1
		DX39B
		KIF3B
		SYHM
		MICA2
		KIFC3
		PGBM
		BRD9
		TF3C3
		P4HA2
		2022-09-09
		SMC2
		RU2B
		PABP4
		ACTBL
		ASPM
		SYAM
		CEP78
		PKHA5
		RAP1B
		STML2
		SMHD1
		MCA3
		RBM42
		CAZA2
		GEMI5
		RM23
		BYST
		SPTN1
		CKAP2
		H2A1J
		NEMF
		KPCI
		NPM
		VIGLN
		MACOI
		MRE11
		AKAP9
		NU153
		FEN1
		ZN598
		TBB6
		HELLS
		ABCF3
		RAE1L
		SMU1
		DSRAD
		RL38
		CHD4
		TRRAP
		ACTC
		DIAP3
		TRIP4
		EIF3L
		LAS1L
		MSH2
		RAB13
		PA2G4
		ERCC6
		H2AJ
		PYRG1
		H2B1K
		HP1B3
		SPS2L
		WDR5
		EF1B
		IF4G2
		NOL9
		COX2
		CDK5
		SRP09
		PDS5A
		RU2A
		DDX23
		JAK1
		RASK
		DNJA1
		PRC2A
		WDR18
		ELP1
		LPPRC
		TCPQ
		DPOE1
		CO9
		ATPB
		NUMA1
		RL36A
		AT2A2
		CHM4B
		K6PL
		1433T
		UHRF1
		H33
		TOE1
		U3IP2
		TBB8
		DDX41
[truncated: 157 more rows]
