# Supplementary material for: Proximity Profiling of the CFTR Interaction Landscape in Response to Orkambi
Source: Int J Mol Sci. 2022 Feb 23;23(5):2442. doi: 10.3390/ijms23052442 (PMC8910062; doi:10.3390/ijms23052442)
Supplement: Supplementary file 1 [file ijms-23-02442-s001.zip › SuppDataset3.xlsx]

## Sheet: Clathrin-Coated Vesicles
Clathrin Coated Vesicles	adjusted_p_value	Prey
GO:0030136	5.92e-12	AP1G1	AP1M1	ATP7A	EPN1	FCHO2	GGA2	GOPC	IGF2R	NUMB	PICALM	RAB27A	RAB35	ROR2	SCAMP1	SCARB2	SCYL2	SNX3	SPG21	STEAP2	STX6	TFRC	TMED10	VAMP7	VAMP8	VPS33B
