# Supplementary material for: Proximity Profiling of the CFTR Interaction Landscape in Response to Orkambi
Source: Int J Mol Sci. 2022 Feb 23;23(5):2442. doi: 10.3390/ijms23052442 (PMC8910062; doi:10.3390/ijms23052442)
Supplement: Supplementary file 1 [file ijms-23-02442-s001.zip › SuppDataset4.xlsx]

## Sheet: Cellular Response to Stress
Term Name	Protein Binding				Nucleus				Catalytic Activity Acting on a Protein		Proteasome Complex	Ubiquitin- Like Protein Binding	Proteasome-Mediated Ubiquitin- Dependent Protein Catabolic Process	Response to Decreased Oxygen Levels
Adjusted p-value	4.41e-13				2.45e-20				1.25e-09		2.89e-18	0.00195392	1.03e-17	5.68e-17
Prey	UBB	TMEM161A	USP10	CEP63	UBB	BACH1	SLU7	FGF14	PSMB4	PRKDC	PSMB4	NBR1	UBB	UBB
	NBR1	MCL1	PSMC6	ASCC1	NBR1	CBX5	GSTM3	RAD51	PSMB5	PSMA4	PSMB5	UBE2L6	PSMB4	PSMB4
	PSMB4	BCLAF1	TPR	ADAM8	PSMB4	NUP153	LIG3	NUDT16L1	PSMB3	HM13	PSMB3	RAE1	PSMB5	PSMB5
	PSMB5	TFIP11	RAE1	GPS1	PSMB5	NUP98	STK4	RAD23A	PSMB1	COPS2	PSMB1	SQSTM1	PSMB3	PSMB3
	PSMB3	UHRF1	G6PD	AATF	PSMB3	STK3	TRIP12	ASCC2	PSMA1	EHMT2	PSMA1	TOP2A	PSMB1	PSMB1
	HMGCR	GTSE1	GET4	KDM1A	ATF6	CDC5L	FLNA		PSMA3	MAPKAPK2	PSMA3	FAF2	HERPUD1	PSMA1
	ATF6	PPP4C	LIMD1	WRNIP1	PSMB1	PRMT1	PARP1		PSMB7	EIF2AK3	PSMB7	RAD23A	PSMA1	PSMA3
	PSMB1	KIAA0319	TAF9B	NUP214	CBS	TCEB1	RANBP2		PJA2	PSMB2	UBQLN4	ASCC2	PSMA3	PSMB7
	HERPUD1	CHORDC1	HDAC2	PRKDC	PSMA1	ACADVL	SQSTM1		IRAK1	CDKN2A	PSMA6		PSMB7	IRAK1
	CBS	UPF1	NUP107	TOP2A	PSMA3	ATXN3	CETN2		USP33	DUSP3	PSMA7		UBXN8	TBL2
	PSMA1	PSMD10	CAMK2B	AAAS	MIF	PBK	FXR1		TAB1	EGLN1	PSMA5		BAG5	PSMA6
	PSMA3	BACH1	PSMB6	ARHGEF2	PSMB7	EIF4EBP1	EXD2		HUWE1	GSR	PSMD10		UBQLN4	PSMA7
	MIF	CBX5	UBXN6	ERLIN1	UBXN8	EYA4	FMR1		PSMA6	FBXW11	PSMC6		HUWE1	PSMA5
	PSMB7	PDE8A	UBAC2	FAF2	RRM2B	NUP210	RBM17		PSMA7	MAP3K10	PSMB6		PSMA6	PSMD10
	UBXN8	NUP153	MSH5	PSMA4	RIF1	HSPH1	SUMO1		PSMA5		PSMA4		KEAP1	BACH1
	MTR	NUP98	POLD1	HM13	SUPT16H	DDB1	ASCC1		ATG7		PSMB2		PSMA7	TCEB1
	RRM2B	MFN2	ASNS	PYCR2	ATF6B	POLD2	GPS1		CARM1		RAD23A		PSMA5	EIF4EBP1
	MAP1B	STK3	SREBF2	COPS2	IRAK1	PRKCD	AATF		UHRF1				PSMD10	PSMC6
	PJA2	CDC5L	GNB1	EHMT2	USP33	UBE2L6	KDM1A		PPP4C				ATXN3	LIMD1
	RIF1	PRMT1	BTRC	FTO	BAG5	RECQL	WRNIP1		NUP98				PBK	PSMB6
	SUPT16H	TCEB1	MSH3	NUDT1	POLR2B	BAZ1B	NUP214		STK3				DDB1	GNB1
	ATF6B	LANCL1	SLU7	MAPKAPK2	RPA2	CNOT10	PRKDC		PRMT1				FAM8A1	ADAM8
	IRAK1	ACADVL	HAUS7	NUP88	TAB1	PPP1CA	TOP2A		ATXN3				ERLIN2	PSMA4
	USP33	ATXN3	GSTM3	HSPA9	UBQLN4	USP10	AAAS		PBK				PSMC6	PSMB2
	BAG5	PBK	LIG3	EIF2AK3	HUWE1	PSMC6	PSMA4		EYA4				PSMB6	EGLN1
	POLR2B	CLPB	STK4	PSMB2	SLC30A9	TPR	COPS2		PRKCD				BTRC
	RPA2	EIF4EBP1	TRIP12	NUP133	PSMA6	RAE1	EHMT2		UBE2L6				SUMO1
	TAB1	EYA4	FLNA	CDKN2A	KEAP1	G6PD	FTO		BAZ1B				ERLIN1
	UBQLN4	YIF1A	GIGYF2	DUSP3	PSMA7	GET4	NUDT1		PPP1CA				FAF2
	HUWE1	HSPH1	PARP1	EGLN1	ASCC3	LIMD1	MAPKAPK2		USP10				PSMA4
	SLC30A9	DDB1	RANBP2	NGLY1	PSMA5	TAF9B	NUP88		HDAC2				PSMB2
	PYCR1	POLD2	SQSTM1	QRICH1	DHX36	HDAC2	HSPA9		CAMK2B				FBXW11
	TBL2	FAM8A1	CETN2	CNOT3	CARM1	NUP107	PSMB2		PSMB6				RAD23A
	PSMA6	PRKCD	DBNL	FBXW11	MCL1	CAMK2B	NUP133		BTRC
	KEAP1	UBE2L6	FXR1	FGF14	BCLAF1	PSMB6	CDKN2A		STK4
	PSMA7	RECQL	EXD2	MAP3K10	TFIP11	UBXN6	DUSP3		TRIP12
	ASCC3	MCTS1	FMR1	RAD51	UHRF1	MSH5	EGLN1		PARP1
	PSMA5	BAZ1B	RBM17	NUDT16L1	GTSE1	POLD1	NGLY1		RANBP2
	DHX36	CNOT10	STAU1	RAD23A	PPP4C	SREBF2	QRICH1		SQSTM1
	ATG7	ERLIN2	SUMO1	ASCC2	UPF1	BTRC	CNOT3		ADAM8
	CARM1	PPP1CA	ATP13A2		PSMD10	MSH3	FBXW11		KDM1A
