# Supplementary material for: Proximity Profiling of the CFTR Interaction Landscape in Response to Orkambi
Source: Int J Mol Sci. 2022 Feb 23;23(5):2442. doi: 10.3390/ijms23052442 (PMC8910062; doi:10.3390/ijms23052442)
Supplement: Supplementary file 1 [file ijms-23-02442-s001.zip › SuppDataset5.xlsx]

## Sheet: Sheet1
Bait	PreyGene	AvgSpec	SaintScore	BFDR
WT-CFTR	CLDN1	3.67	0.99	0
WT-CFTR	KIAA1468	7.67	0.97	0
WT-CFTR	CACHD1	5.67	1	0
WT-CFTR	MPP7	7.67	1	0
WT-CFTR	HSPBP1	6	0.96	0.01
WT-CFTR	SPCS3	9.33	0.99	0
WT-CFTR	CLCC1	10.33	0.91	0.01
WT-CFTR	SDHB	5.33	0.88	0.01
WT-CFTR	ATP7A	3.33	0.98	0
WT-CFTR	SCAMP1	51	1	0
WT-CFTR	ITGA2	7.33	1	0
WT-CFTR	DSG2	50	1	0
WT-CFTR	GARS	25.33	0.93	0.01
WT-CFTR	NCAPG2	7	0.88	0.01
WT-CFTR	SLC38A1	3.67	0.92	0.01
WT-CFTR	RG9MTD1	11.67	0.97	0.01
WT-CFTR	SLC29A1	5.67	1	0
WT-CFTR	STXBP3	19	1	0
WT-CFTR	FNDC3A	7	0.97	0
WT-CFTR	ITGA6	16	1	0
WT-CFTR	VPS33B	6.33	0.95	0.01
WT-CFTR	DLG3	6.33	1	0
WT-CFTR	IGF2R	18.67	1	0
WT-CFTR	LRRC4B	8.33	1	0
WT-CFTR	NNT	25.33	1	0
WT-CFTR	POR	24	1	0
WT-CFTR	DDRGK1	23	1	0
WT-CFTR	AASS	5.33	0.95	0.01
WT-CFTR	ALG12	3.33	1	0
WT-CFTR	TMEM43	6.33	0.98	0
WT-CFTR	SCARB1	3.33	0.98	0
WT-CFTR	VPS37B	4	0.99	0
WT-CFTR	L2HGDH	4.33	0.99	0
WT-CFTR	ABCC1	8.67	1	0
WT-CFTR	EIF2AK3	4.67	1	0
WT-CFTR	PI4K2A	2	0.96	0.01
WT-CFTR	TMEM93	13.67	1	0
WT-CFTR	CDC42EP4	3	0.96	0.01
WT-CFTR	CDCA3	15	0.97	0.01
WT-CFTR	VAMP8	4	0.99	0
WT-CFTR	RPS12	107.33	1	0
WT-CFTR	C1orf226	61.67	1	0
WT-CFTR	RELL1	9.67	1	0
WT-CFTR	PEAK1	8	1	0
WT-CFTR	SLC25A24	5	1	0
WT-CFTR	FAM213A	6.67	1	0
WT-CFTR	PACSIN2	21.33	1	0
WT-CFTR	BAG6	3.67	0.98	0
WT-CFTR	ATP6AP2	16	1	0
WT-CFTR	ARFGEF2	3	0.98	0
WT-CFTR	AGPAT1	13.67	1	0
WT-CFTR	TMX1	8.33	0.93	0.01
WT-CFTR	SPTAN1	25.67	0.9	0.01
WT-CFTR	VEZT	9	1	0
WT-CFTR	SDHA	9.33	0.96	0.01
WT-CFTR	SEMA4C	23.33	1	0
WT-CFTR	SPCS2	12	1	0
WT-CFTR	UQCRFS1	24.67	1	0
WT-CFTR	TRIM13	25	1	0
WT-CFTR	PLD3	3	0.99	0
WT-CFTR	KIRREL	12	1	0
WT-CFTR	SLC2A1	8.33	0.9	0.01
WT-CFTR	PCYOX1	4	0.98	0
WT-CFTR	SSR1	10.33	1	0
WT-CFTR	RP2	8.33	1	0
WT-CFTR	STX7	40	1	0
WT-CFTR	ATP6AP1	22.33	1	0
WT-CFTR	CCDC47	86.67	1	0
WT-CFTR	VPS45	40.67	1	0
WT-CFTR	VAT1	18	1	0
WT-CFTR	SLC25A19	7.33	1	0
WT-CFTR	ACAP2	24.33	1	0
WT-CFTR	HMOX2	21.33	1	0
WT-CFTR	LRRC8A	8	1	0
WT-CFTR	SLC39A10	11.33	1	0
WT-CFTR	OPA1	8.33	1	0
WT-CFTR	WDR48	17.33	1	0
WT-CFTR	ETFA	29.67	1	0
WT-CFTR	TFRC	59	1	0
WT-CFTR	SACM1L	5.33	0.99	0
WT-CFTR	SLC39A14	3.67	1	0
WT-CFTR	EFR3B	8.33	1	0
WT-CFTR	INPP1	4.33	0.98	0
WT-CFTR	ATP6V0A1	7.67	1	0
WT-CFTR	LRRC57	11.67	1	0
WT-CFTR	CLGN	5	1	0
WT-CFTR	USP46	6	1	0
WT-CFTR	ST13	10	0.95	0.01
WT-CFTR	SCP2	4.33	1	0
WT-CFTR	NUMB	12.67	0.99	0
WT-CFTR	HADHA	36	1	0
WT-CFTR	C14orf133	9.33	0.97	0
WT-CFTR	DHRS7B	12.67	0.88	0.01
WT-CFTR	ATP6V1F	15	1	0
WT-CFTR	EPHX1	9.67	1	0
WT-CFTR	BCAP31	6.67	0.92	0.01
WT-CFTR	SLC25A12	18	1	0
WT-CFTR	ACAD9	5.67	0.99	0
WT-CFTR	ATP5F1	16	1	0
WT-CFTR	SLC38A2	59.33	1	0
WT-CFTR	CCDC115	7.67	0.94	0.01
WT-CFTR	AGPAT9	8.33	1	0
WT-CFTR	ALG5	10	1	0
WT-CFTR	MAGT1	10.67	1	0
WT-CFTR	ATPAF2	7.67	1	0
WT-CFTR	SAR1A	18.67	1	0
WT-CFTR	ANO6	13.33	1	0
WT-CFTR	BAIAP2	16	0.92	0.01
WT-CFTR	FCHO2	20.33	0.99	0
WT-CFTR	PCYOX1L	3	0.93	0.01
WT-CFTR	SLC27A2	14.67	1	0
WT-CFTR	CDC42EP1	6.33	0.97	0
WT-CFTR	SRPR	47.33	1	0
WT-CFTR	ERO1LB	5.67	1	0
WT-CFTR	SBF1	5.33	1	0
WT-CFTR	NOTCH2	17	0.99	0
WT-CFTR	PPP2R5C	11.33	1	0
WT-CFTR	UBXN4	35.67	1	0
WT-CFTR	RAB11FIP5	26.67	1	0
WT-CFTR	C20orf3	14.33	1	0
WT-CFTR	KIAA1549	4	0.98	0
WT-CFTR	MRPL12	3.67	0.93	0.01
WT-CFTR	MMGT1	10.33	1	0
WT-CFTR	GPD2	16	1	0
WT-CFTR	CDK5RAP3	17.67	1	0
WT-CFTR	STX12	34.33	1	0
WT-CFTR	DAG1	3.33	0.99	0
WT-CFTR	STX3	15	1	0
WT-CFTR	SLC33A1	7	1	0
WT-CFTR	EHD1	5	0.89	0.01
WT-CFTR	DCXR	7.67	1	0
WT-CFTR	STT3B	17.67	1	0
WT-CFTR	EXOC3	104.33	1	0
WT-CFTR	WDR20	3.67	1	0
WT-CFTR	FAM158A	13.67	1	0
WT-CFTR	SLC35F2	24.67	1	0
WT-CFTR	HSPD1	256.67	1	0
WT-CFTR	AUP1	5	1	0
WT-CFTR	SNX27	11.33	1	0
WT-CFTR	SGPL1	6.33	1	0
WT-CFTR	BAIAP2L1	14	0.91	0.01
WT-CFTR	PPP5C	2.33	0.97	0
WT-CFTR	NF2	13.33	1	0
WT-CFTR	OCLN	35	1	0
WT-CFTR	JAM3	3	0.99	0
WT-CFTR	PODXL	4	0.99	0
WT-CFTR	MYEF2	7	0.88	0.01
WT-CFTR	RAB7A	32	1	0
WT-CFTR	RAB23	12.67	0.99	0
WT-CFTR	STX5	11	0.99	0
WT-CFTR	RALGAPB	17.67	1	0
WT-CFTR	UBE2J1	7.33	0.99	0
WT-CFTR	LMTK2	18	1	0
WT-CFTR	SEC22B	21	0.99	0
WT-CFTR	KIAA1715	5	1	0
WT-CFTR	FNBP1	8	1	0
WT-CFTR	NAA25	3	0.98	0
WT-CFTR	GNL1	3.67	1	0
WT-CFTR	SNX17	3.67	0.92	0.01
WT-CFTR	C19orf26	9.33	1	0
WT-CFTR	PANX1	14.67	1	0
WT-CFTR	CNNM3	3.67	0.99	0
WT-CFTR	GPRC5C	9	1	0
WT-CFTR	SLC23A2	5.33	1	0
WT-CFTR	SLC27A4	2.67	0.99	0
WT-CFTR	ZDHHC5	8	1	0
WT-CFTR	ABCB7	9.67	0.98	0
WT-CFTR	PTRF	6.67	1	0
WT-CFTR	ATP6V0A2	5.67	1	0
WT-CFTR	ATP1B1	4.67	1	0
WT-CFTR	ATP1B3	9.33	0.91	0.01
WT-CFTR	CAMLG	15.33	1	0
WT-CFTR	ETFB	7.67	0.98	0
WT-CFTR	STBD1	8.33	1	0
WT-CFTR	GNS	2.67	0.97	0
WT-CFTR	HSPB1	16.33	1	0
WT-CFTR	KPNA2	34.33	0.97	0.01
WT-CFTR	MPZL1	3	0.99	0
WT-CFTR	RCN1	5.33	0.99	0
WT-CFTR	SLC7A1	8.67	1	0
WT-CFTR	STX10	16.33	1	0
WT-CFTR	STXBP1	5.33	0.99	0
WT-CFTR	UMPS	5.33	0.93	0.01
WT-CFTR	ESYT2	32.33	1	0
WT-CFTR	SLC25A20	4	1	0
WT-CFTR	CTBP1	7	0.97	0.01
WT-CFTR	C19orf63	18	1	0
WT-CFTR	ARHGAP1	64	1	0
WT-CFTR	COPB2	12.33	0.97	0
WT-CFTR	EFNB1	13	1	0
WT-CFTR	EFNB2	12.33	1	0
WT-CFTR	SLC9A3R1	24.67	1	0
WT-CFTR	SCYL2	25	0.9	0.01
WT-CFTR	OXSR1	7.67	0.9	0.01
WT-CFTR	SMAD4	7.33	0.88	0.01
WT-CFTR	FLOT1	9.67	1	0
WT-CFTR	IDH3A	5.33	1	0
WT-CFTR	LMAN1	12.33	1	0
WT-CFTR	STX6	35	1	0
WT-CFTR	ADCY9	23	1	0
WT-CFTR	RALGAPA1	9	1	0
WT-CFTR	ATP5H	30.67	1	0
WT-CFTR	COX4NB	54.67	1	0
WT-CFTR	SLC30A1	16	1	0
WT-CFTR	ARL6IP5	39.67	1	0
WT-CFTR	CDIPT	18.33	0.98	0
WT-CFTR	ITGA5	25.33	1	0
WT-CFTR	STEAP3	11	1	0
WT-CFTR	CISD2	13.67	1	0
WT-CFTR	EBP	7.33	0.98	0
WT-CFTR	EXOC5	19.67	1	0
WT-CFTR	YKT6	194.33	1	0
WT-CFTR	STIP1	27.67	0.92	0.01
WT-CFTR	RICTOR	5.33	1	0
WT-CFTR	CHP	5.67	1	0
WT-CFTR	PRAF2	18	1	0
WT-CFTR	TTC7B	6.67	1	0
WT-CFTR	FAM83B	2.33	0.97	0
WT-CFTR	LNPEP	56.67	1	0
WT-CFTR	GOPC	11.33	1	0
WT-CFTR	LLGL1	19.67	1	0
WT-CFTR	VANGL2	30.67	1	0
WT-CFTR	VMA21	14.33	1	0
WT-CFTR	TMEM209	6.33	0.99	0
WT-CFTR	CD276	9.33	1	0
WT-CFTR	APPL1	9.33	1	0
WT-CFTR	LPHN2	29.33	1	0
WT-CFTR	PREB	24.67	0.99	0
WT-CFTR	ARFIP1	29	1	0
WT-CFTR	EEPD1	2	0.96	0.01
WT-CFTR	MCAM	66	1	0
WT-CFTR	AP1G1	9.33	1	0
WT-CFTR	SAR1B	16.67	1	0
WT-CFTR	RHOT1	4.67	1	0
WT-CFTR	SEC11A	18	0.98	0
WT-CFTR	FLVCR1	3	0.98	0
WT-CFTR	PPM1F	4.33	0.92	0.01
WT-CFTR	TTC35	82.67	1	0
WT-CFTR	RAB11FIP2	14.67	0.97	0
WT-CFTR	TMEM85	17.67	1	0
WT-CFTR	C8orf55	9.67	0.98	0
WT-CFTR	DHRS7	37	1	0
WT-CFTR	CYB5B	5.33	0.94	0.01
WT-CFTR	C11orf2	26.33	1	0
WT-CFTR	STX18	10.33	1	0
WT-CFTR	LYSMD3	4.33	1	0
WT-CFTR	TMEM160	3.67	0.99	0
WT-CFTR	TMEM111	76.33	1	0
WT-CFTR	PALM	17.33	1	0
WT-CFTR	CDKAL1	20.67	0.99	0
WT-CFTR	FLOT2	35.67	1	0
WT-CFTR	CNNM4	11.33	1	0
WT-CFTR	VAPA	43.33	1	0
WT-CFTR	CNP	11.67	0.97	0
WT-CFTR	MTHFD2	3.67	0.98	0
WT-CFTR	LRRC1	7.33	1	0
WT-CFTR	TMED10	11.33	0.99	0
WT-CFTR	C15orf24	54.33	1	0
WT-CFTR	SMPD4	18.67	1	0
WT-CFTR	CTNND1	82.67	1	0
WT-CFTR	FRS2	11.33	1	0
WT-CFTR	CLDND1	3.33	0.98	0
WT-CFTR	SPTBN1	16.33	0.95	0.01
WT-CFTR	PVRL2	26.33	1	0
WT-CFTR	ST7	3.67	0.95	0.01
WT-CFTR	GNA13	4	1	0
WT-CFTR	JUP	39.67	1	0
WT-CFTR	SLC12A7	9	1	0
WT-CFTR	SLC12A4	9	1	0
WT-CFTR	SLC12A6	9	1	0
WT-CFTR	DSC2	11.33	1	0
WT-CFTR	TBC1D10A	24	1	0
WT-CFTR	AP1M1	8	0.98	0
WT-CFTR	GPR89A	19.33	1	0
WT-CFTR	PTPRJ	3	0.97	0
WT-CFTR	CAV1	5.33	1	0
WT-CFTR	SLC25A4	18.67	1	0
WT-CFTR	FAM135A	40	1	0
WT-CFTR	SCAMP3	12	0.93	0.01
WT-CFTR	RABGAP1	14	0.99	0
WT-CFTR	UBQLN2	2.67	0.98	0
WT-CFTR	UBQLN1	7.33	1	0
WT-CFTR	BNIP2	5.33	1	0
WT-CFTR	SLC1A3	10	0.97	0.01
WT-CFTR	ABCB10	10	0.99	0
WT-CFTR	TUBA1A	31	1	0
WT-CFTR	CASK	10.33	0.98	0
WT-CFTR	SNAP23	22.67	1	0
WT-CFTR	SPRY4	11.67	1	0
WT-CFTR	RAB11B	18	1	0
WT-CFTR	TEX264	6	1	0
WT-CFTR	SLC9A3R2	23.33	1	0
WT-CFTR	EPN1	7.67	0.88	0.01
WT-CFTR	VRK2	51.33	1	0
WT-CFTR	ITGB1	48.67	1	0
WT-CFTR	ROR2	9.33	1	0
WT-CFTR	RAB3B	10.67	1	0
WT-CFTR	RAB27A	5.67	1	0
WT-CFTR	RAB35	2.33	0.88	0.01
WT-CFTR	SLC30A5	11	1	0
WT-CFTR	FERMT2	78	1	0
WT-CFTR	CANT1	10	1	0
WT-CFTR	ELMOD3	3	0.98	0
WT-CFTR	PDHX	3.67	0.9	0.01
WT-CFTR	VANGL1	49.33	1	0
WT-CFTR	PIP5K1A	6.33	1	0
WT-CFTR	RAB7L1	4.67	0.95	0.01
WT-CFTR	MAPK1	4.33	0.89	0.01
WT-CFTR	CMPK1	20	1	0
WT-CFTR	ATP1A1	64.67	1	0
WT-CFTR	TULP3	5.33	0.99	0
WT-CFTR	SLC30A6	5.67	0.99	0
WT-CFTR	SLC6A8	31	1	0
WT-CFTR	KIAA0090	392.33	1	0
WT-CFTR	CPD	22.67	1	0
WT-CFTR	AIFM1	15.33	0.94	0.01
WT-CFTR	ITGA7	2.67	0.97	0
WT-CFTR	VAMP7	10	1	0
WT-CFTR	ITGAV	16.33	1	0
WT-CFTR	TMEM199	5	1	0
WT-CFTR	MOSPD2	10.33	1	0
WT-CFTR	APPL2	43	1	0
WT-CFTR	HLA-A	9	0.99	0
WT-CFTR	MARK2	6.33	0.98	0
WT-CFTR	MARK3	9.33	0.9	0.01
WT-CFTR	PYGL	31.67	0.96	0.01
WT-CFTR	NOS1AP	61.33	1	0
WT-CFTR	SLC7A2	5	1	0
WT-CFTR	APBB2	5	1	0
WT-CFTR	BTN3A3	17.33	1	0
WT-CFTR	BTN3A2	8	1	0
WT-CFTR	LMNA	27.33	1	0
WT-CFTR	SLC9A1	7.33	1	0
WT-CFTR	TMED5	3.33	0.93	0.01
WT-CFTR	RAB3IP	9.67	1	0
WT-CFTR	RAB11FIP1	50	1	0
WT-CFTR	ARL13B	35.33	1	0
WT-CFTR	ESYT1	109.33	0.96	0.01
WT-CFTR	EPB41L5	11	1	0
WT-CFTR	GORASP2	19.33	0.98	0
WT-CFTR	DOLPP1	18	0.99	0
WT-CFTR	OSBPL9	11.33	1	0
WT-CFTR	LEMD2	4.33	1	0
WT-CFTR	PPFIBP1	18.33	1	0
WT-CFTR	TMEM87A	22.67	1	0
WT-CFTR	PGM3	8	0.99	0
WT-CFTR	CD44	4.67	1	0
WT-CFTR	UNC5B	8.33	1	0
WT-CFTR	DLG1	59	1	0
WT-CFTR	PIK3R1	6.33	1	0
WT-CFTR	PRDX5	9	1	0
WT-CFTR	EPHA2	77.67	1	0
WT-CFTR	EPHA3	3.33	1	0
WT-CFTR	PICALM	40.33	0.99	0
WT-CFTR	SLC6A15	21	0.98	0
WT-CFTR	RALA	6.67	1	0
WT-CFTR	ALCAM	3.67	1	0
WT-CFTR	LRBA	159.33	1	0
WT-CFTR	PI4KA	6.67	0.9	0.01
WT-CFTR	GLS	4.67	0.94	0.01
WT-CFTR	SLC12A2	45.67	1	0
WT-CFTR	RHOC	5.33	1	0
WT-CFTR	BSG	14	0.95	0.01
WT-CFTR	SLC4A7	88.33	1	0
WT-CFTR	LSR	13.67	1	0
WT-CFTR	TOR1AIP1	21.67	0.9	0.01
WT-CFTR	ABCB1	9.33	1	0
WT-CFTR	CAPNS1	7.33	0.99	0
WT-CFTR	LYN	13	1	0
WT-CFTR	YES1	32	1	0
WT-CFTR	SRC	16	1	0
WT-CFTR	CXADR	25.67	1	0
WT-CFTR	DHPS	53	1	0
WT-CFTR	HSD17B4	27	1	0
WT-CFTR	SNX3	9.33	0.98	0
WT-CFTR	KIF5C	4.67	0.91	0.01
WT-CFTR	VAPB	36	1	0
WT-CFTR	STX16	18.33	1	0
WT-CFTR	NAPA	11.67	1	0
WT-CFTR	ATP2B4	11	1	0
WT-CFTR	SOAT1	3.67	1	0
WT-CFTR	SCARB2	4.33	0.93	0.01
WT-CFTR	CTNNA1	19.33	0.99	0
WT-CFTR	IGSF3	3	0.99	0
WT-CFTR	BTF3L4	7.67	0.96	0.01
WT-CFTR	LRP8	4.67	1	0
WT-CFTR	SLC3A2	77.67	1	0
WT-CFTR	GDI2	12.67	1	0
WT-CFTR	A2M	3.33	0.98	0
WT-CFTR	TMEM2	46.33	1	0
WT-CFTR	SLC7A5	6.33	0.92	0.01
WT-CFTR	ITCH	3	0.99	0
WT-CFTR	EXOC4	49.67	1	0
WT-CFTR	FAM91A1	52.33	1	0
WT-CFTR	SQRDL	3.33	0.99	0
WT-CFTR	DERL1	6.33	0.97	0
WT-CFTR	SBDS	2	0.96	0.01
WT-CFTR	RABL3	10	0.96	0.01
WT-CFTR	VTA1	5	0.91	0.01
WT-CFTR	GOLT1B	5.33	0.99	0
WT-CFTR	MTX1	5	0.96	0.01
WT-CFTR	RAB3IL1	6.33	1	0
WT-CFTR	UFSP2	2.33	0.97	0
WT-CFTR	SSBP1	6.67	1	0
WT-CFTR	ATP9A	7	1	0
WT-CFTR	FCGRT	4.33	0.99	0
WT-CFTR	FKBP5	3.67	0.98	0
WT-CFTR	PPP2R5E	5.33	1	0
WT-CFTR	USE1	3	0.98	0
WT-CFTR	AGPAT6	6	1	0
WT-CFTR	TBC1D14	6.67	1	0
WT-CFTR	GOSR1	6.67	1	0
WT-CFTR	TMEM9	2.67	0.98	0
WT-CFTR	CAB39	3	0.93	0.01
WT-CFTR	F11R	4.67	1	0
WT-CFTR	MUT	2.67	0.97	0
WT-CFTR	ARFGEF1	3.33	0.98	0
WT-CFTR	TRNT1	3	0.93	0.01
WT-CFTR	USP32	3.67	1	0
WT-CFTR	WDFY1	2.33	0.97	0
WT-CFTR	SCPEP1	5.33	0.99	0
WT-CFTR	CDH2	2.67	0.97	0
WT-CFTR	SYS1	3.67	1	0
WT-CFTR	EFR3A	5.33	1	0
WT-CFTR	C19orf6	2	0.96	0.01
WT-CFTR	SPG21	2.67	0.97	0
WT-CFTR	AP4S1	3	0.98	0
WT-CFTR	GSK3B	5.67	0.96	0.01
WT-CFTR	JAG2	3	0.98	0
WT-CFTR	PAFAH1B3	2	0.96	0.01
WT-CFTR	MCU	2.67	0.99	0
WT-CFTR	ATP6V0C	5.33	0.91	0.01
WT-CFTR	USP19	3	0.97	0
WT-CFTR	CHMP6	4.33	1	0
WT-CFTR	PLSCR3	3.67	0.98	0
WT-CFTR	MPV17	2.33	0.97	0
WT-CFTR	THBD	3.67	0.99	0
WT-CFTR	HSBP1	4.67	1	0
WT-CFTR	SCAMP2	6.33	1	0
WT-CFTR	MLLT11	2.33	0.99	0
WT-CFTR	IBA57	3	0.97	0
WT-CFTR	SLC38A3	6	1	0
WT-CFTR	TMEM115	2.33	0.97	0
WT-CFTR	PARD6B	2	0.96	0.01
WT-CFTR	TOMM20	6	1	0
WT-CFTR	TRAM1	3.67	1	0
WT-CFTR	UQCRQ	2.67	0.97	0
WT-CFTR	PGPEP1	5.67	0.99	0
WT-CFTR	TIMM13	4.67	1	0
WT-CFTR	CCM2	4	1	0
WT-CFTR	CADM1	4.67	1	0
WT-CFTR	SLC1A4	4.67	1	0
WT-CFTR	CYP51A1	5.33	0.88	0.01
WT-CFTR	MTX3	3	0.91	0.01
WT-CFTR	FUNDC1	3.33	1	0
WT-CFTR	ANO10	3.33	1	0
WT-CFTR	GNB4	4	0.97	0.01
WT-CFTR	STEAP2	7	1	0
WT-CFTR	UBE2D1	2.33	0.97	0
WT-CFTR	EFNB3	2	0.96	0.01
WT-CFTR	TNFRSF10B	3	0.98	0
WT-CFTR	ALG3	2.33	0.99	0
WT-CFTR	GHR	7	1	0
WT-CFTR	CYCS	2.33	0.97	0
WT-CFTR	GGA2	9	1	0
WT-CFTR	NCS1	4.33	1	0
WT-CFTR	PPAP2B	3.33	1	0
WT-CFTR	COX5B	2.33	0.99	0
WT-CFTR	MAP2K3	3.33	0.93	0.01
WT-CFTR	TRAPPC6B	7	1	0
WT-CFTR	LRRC8D	6	0.94	0.01
WT-CFTR	TBC1D22B	5	0.96	0.01
WT-CFTR	PLD1	3.33	0.97	0
WT-CFTR	ARFRP1	2.33	0.97	0
∆F508 + MG132	BioID_SpikeTide	44.75	1	0
∆F508 + MG132	SAV_STRAV	396.75	1	0
∆F508 + MG132	ACBD5	13.25	1	0
∆F508 + MG132	TIMM13	2.25	0.96	0.01
∆F508 + MG132	RRBP1	5.25	0.96	0.01
∆F508 + MG132	HSPBP1	3.75	0.93	0.01
∆F508 + MG132	UBE2S	3	0.98	0
∆F508 + MG132	SLC38A1	3.5	0.96	0.01
∆F508 + MG132	FNDC3A	13.25	1	0
∆F508 + MG132	KIAA0368	32.5	1	0
∆F508 + MG132	POR	13.5	1	0
∆F508 + MG132	DDRGK1	29.25	1	0
∆F508 + MG132	ABCC1	4.75	1	0
∆F508 + MG132	EIF2AK3	10.5	1	0
∆F508 + MG132	HAX1	10.5	0.99	0
∆F508 + MG132	SERPINB1	5.5	1	0
∆F508 + MG132	TMEM93	8.25	1	0
∆F508 + MG132	C1orf43	11.5	1	0
∆F508 + MG132	GPR89A	12.5	1	0
∆F508 + MG132	CECR5	11	0.99	0
∆F508 + MG132	ANKLE2	16	0.97	0.01
∆F508 + MG132	ATP13A3	3	0.99	0
∆F508 + MG132	ATP6AP2	21.5	1	0
∆F508 + MG132	ITPR3	4.25	0.98	0
∆F508 + MG132	IMMT	12.75	0.99	0
∆F508 + MG132	TRNT1	4.25	0.99	0
∆F508 + MG132	VEZT	17	1	0
∆F508 + MG132	C19orf6	6	1	0
∆F508 + MG132	SNX19	3.5	0.98	0
∆F508 + MG132	PSMD13	18.5	0.98	0
∆F508 + MG132	SPCS2	17.75	1	0
∆F508 + MG132	UQCRFS1	16	0.98	0
∆F508 + MG132	TRIM13	47	1	0
∆F508 + MG132	PLD3	2.75	0.98	0
∆F508 + MG132	MTR	48.5	0.98	0
∆F508 + MG132	ATP13A1	9.25	0.99	0
∆F508 + MG132	YIF1A	5.25	1	0
∆F508 + MG132	ATP6AP1	21.75	1	0
∆F508 + MG132	CCDC47	56.5	1	0
∆F508 + MG132	ZMPSTE24	9.25	0.94	0.01
∆F508 + MG132	HMOX2	10.25	0.99	0
∆F508 + MG132	LRRC8A	3.75	0.97	0
∆F508 + MG132	ALDH7A1	6	0.93	0.01
∆F508 + MG132	PPP1R15B	9	1	0
∆F508 + MG132	MFN2	3.5	0.99	0
∆F508 + MG132	SACM1L	2.75	0.92	0.01
∆F508 + MG132	PSMC6	27.75	0.98	0
∆F508 + MG132	HMGCR	11.75	1	0
∆F508 + MG132	ITGB1	7.25	0.97	0.01
∆F508 + MG132	CKAP4	59.75	0.99	0
∆F508 + MG132	ST13	12.75	1	0
∆F508 + MG132	HADHA	22	0.98	0
∆F508 + MG132	ATF6B	5.75	1	0
∆F508 + MG132	EPHX1	7.75	1	0
∆F508 + MG132	STIM1	17	1	0
∆F508 + MG132	LANCL1	2.25	0.96	0.01
∆F508 + MG132	UCHL1	8.5	0.97	0.01
∆F508 + MG132	PSMC3	55.5	1	0
∆F508 + MG132	DNAJC1	3.5	0.99	0
∆F508 + MG132	AGPAT9	13.25	1	0
∆F508 + MG132	MAGT1	9.75	0.99	0
∆F508 + MG132	TMX2	4.75	1	0
∆F508 + MG132	SNAP47	7.75	1	0
∆F508 + MG132	PSMB3	17	1	0
∆F508 + MG132	PSMB4	25.5	1	0
∆F508 + MG132	TMEM199	9.25	1	0
∆F508 + MG132	PSMA3	9	1	0
∆F508 + MG132	PSMA6	6.5	0.99	0
∆F508 + MG132	SRPR	24.5	1	0
∆F508 + MG132	UBXN4	27.25	1	0
∆F508 + MG132	LRRC47	9	0.92	0.01
∆F508 + MG132	FAF2	22.25	1	0
∆F508 + MG132	PSMD7	7.25	0.97	0.01
∆F508 + MG132	ALDH1B1	9.75	0.95	0.01
∆F508 + MG132	TMEM48	12.25	1	0
∆F508 + MG132	MMGT1	4.5	1	0
∆F508 + MG132	SLC9A1	13.25	1	0
∆F508 + MG132	SBDS	3.25	0.98	0
∆F508 + MG132	SRPRB	16.25	1	0
∆F508 + MG132	C21orf33	8.5	0.97	0.01
∆F508 + MG132	DGKH	8.75	0.96	0.01
∆F508 + MG132	PDZD8	12.5	1	0
∆F508 + MG132	SLC33A1	6.75	1	0
∆F508 + MG132	PEX19	18	1	0
∆F508 + MG132	AGPAT6	7.75	1	0
∆F508 + MG132	SUN2	4	1	0
∆F508 + MG132	HSPA4L	18.5	0.98	0
∆F508 + MG132	FAM158A	6.5	1	0
∆F508 + MG132	TMEM57	11.25	1	0
∆F508 + MG132	PFAS	8.75	0.99	0
∆F508 + MG132	NDUFS1	12.25	0.98	0
∆F508 + MG132	AUP1	5	1	0
∆F508 + MG132	SGPL1	10.25	1	0
∆F508 + MG132	PRDX3	28	1	0
∆F508 + MG132	SELS	2.75	0.97	0.01
∆F508 + MG132	HSPA6	108.5	0.99	0
∆F508 + MG132	SOAT1	4	0.98	0
∆F508 + MG132	SSBP1	3.75	1	0
∆F508 + MG132	UBE2J1	8.75	1	0
∆F508 + MG132	FAM49B	5.75	0.99	0
∆F508 + MG132	KIAA1715	7.25	1	0
∆F508 + MG132	UBQLN4	4.25	1	0
∆F508 + MG132	SLC27A4	10.25	1	0
∆F508 + MG132	USP33	10	1	0
∆F508 + MG132	ACSL3	13.5	0.95	0.01
∆F508 + MG132	CSTB	15.5	1	0
∆F508 + MG132	DGKE	5	1	0
∆F508 + MG132	DEGS1	8.75	1	0
∆F508 + MG132	MSI1	3.75	0.98	0
∆F508 + MG132	PEX3	5	1	0
∆F508 + MG132	PSMA2	20.75	1	0
∆F508 + MG132	PSMB1	21.5	1	0
∆F508 + MG132	PSMB7	7.5	1	0
∆F508 + MG132	PTPN1	32.25	0.98	0
∆F508 + MG132	C19orf63	9.5	1	0
∆F508 + MG132	ADA	4.5	0.99	0
∆F508 + MG132	UBXN8	15.75	1	0
∆F508 + MG132	LMAN1	24.75	1	0
∆F508 + MG132	ADCY9	40.75	1	0
∆F508 + MG132	COX4NB	33	1	0
∆F508 + MG132	FKBP8	11.75	0.92	0.01
∆F508 + MG132	CISD2	13.5	1	0
∆F508 + MG132	ATF6	10.75	1	0
∆F508 + MG132	SLC30A9	6.75	1	0
∆F508 + MG132	SCAMP2	3.75	1	0
∆F508 + MG132	MLLT11	9.25	1	0
∆F508 + MG132	STIP1	28.5	1	0
∆F508 + MG132	HERPUD1	10.25	1	0
∆F508 + MG132	YRDC	3.25	0.97	0.01
∆F508 + MG132	CHP	3	0.98	0
∆F508 + MG132	SEC63	20.25	0.97	0
∆F508 + MG132	HUWE1	33	1	0
∆F508 + MG132	SLC3A2	23.75	1	0
∆F508 + MG132	BAG5	5.5	1	0
∆F508 + MG132	VANGL2	10	1	0
∆F508 + MG132	TMEM209	18	1	0
∆F508 + MG132	IMPDH2	16.25	1	0
∆F508 + MG132	LETM1	5	1	0
∆F508 + MG132	PREB	19.25	1	0
∆F508 + MG132	SPAG5	7.5	0.97	0
∆F508 + MG132	ADAM17	4.25	1	0
∆F508 + MG132	UBL4A	3.75	1	0
∆F508 + MG132	TTC35	52	1	0
∆F508 + MG132	TMEM85	14.75	1	0
∆F508 + MG132	TMEM9	2.75	0.98	0
∆F508 + MG132	DHRS7	17.75	1	0
∆F508 + MG132	AKAP11	16.75	0.97	0
∆F508 + MG132	CYB5B	6	0.98	0
∆F508 + MG132	STX18	13.5	1	0
∆F508 + MG132	PRR11	3.5	0.98	0
∆F508 + MG132	TMEM111	58.5	1	0
∆F508 + MG132	USE1	5.25	1	0
∆F508 + MG132	CDKAL1	28.25	1	0
∆F508 + MG132	VAPA	41.75	0.96	0.01
∆F508 + MG132	UGGT1	3.75	1	0
∆F508 + MG132	C15orf24	34.25	1	0
∆F508 + MG132	SMPD4	51	1	0
∆F508 + MG132	MST4	12.25	0.95	0.01
∆F508 + MG132	SUN1	11.75	1	0
∆F508 + MG132	UBB	46.5	1	0
∆F508 + MG132	CLCC1	13.5	1	0
∆F508 + MG132	ST7	7	1	0
∆F508 + MG132	GNAI2	2.25	0.96	0.01
∆F508 + MG132	MYH10	64.75	1	0
∆F508 + MG132	ISOC2	25.75	0.99	0
∆F508 + MG132	BAG6	22	1	0
∆F508 + MG132	BNIP1	7	1	0
∆F508 + MG132	PJA2	6	1	0
∆F508 + MG132	RDH11	3.75	0.99	0
∆F508 + MG132	TEX264	10	1	0
∆F508 + MG132	ATP6V0A1	7.75	1	0
∆F508 + MG132	VRK2	28.5	1	0
∆F508 + MG132	VANGL1	16.75	1	0
∆F508 + MG132	PIP5K1A	3.25	0.99	0
∆F508 + MG132	KIAA0090	191.75	1	0
∆F508 + MG132	MOSPD2	9.75	1	0
∆F508 + MG132	SLC27A2	6.25	1	0
∆F508 + MG132	PSMA1	13.25	1	0
∆F508 + MG132	PSMA5	12	1	0
∆F508 + MG132	HM13	15	0.92	0.01
∆F508 + MG132	ARMC10	2.5	0.97	0.01
∆F508 + MG132	HLA-C	6.25	1	0
∆F508 + MG132	SNX14	4.5	1	0
∆F508 + MG132	PYGL	31	0.99	0
∆F508 + MG132	LMNA	20.25	0.98	0
∆F508 + MG132	UFD1L	33.25	0.95	0.01
∆F508 + MG132	TMEM87A	3.25	0.92	0.01
∆F508 + MG132	EIF6	7.75	0.99	0
∆F508 + MG132	PKMYT1	3.25	0.99	0
∆F508 + MG132	MTHFD1L	16	1	0
∆F508 + MG132	SLC12A2	8	1	0
∆F508 + MG132	STOM	5	1	0
∆F508 + MG132	SLC4A7	26.5	1	0
∆F508 + MG132	TOR1AIP1	20	0.92	0.01
∆F508 + MG132	ABCB1	8.5	1	0
∆F508 + MG132	CBR1	9	1	0
∆F508 + MG132	CYP51A1	18.75	1	0
∆F508 + MG132	ENO2	5.25	1	0
∆F508 + MG132	HSD17B4	12.75	0.97	0
∆F508 + MG132	SQSTM1	52	0.99	0
∆F508 + MG132	PSMA7	15	0.99	0
∆F508 + MG132	PSMB2	10.5	0.96	0.01
∆F508 + MG132	PSMB5	17.5	1	0
∆F508 + MG132	PSMD10	2.5	0.96	0.01
∆F508 + MG132	PSMD12	29.25	0.93	0.01
∆F508 + MG132	ABCD3	107.75	1	0
∆F508 + MG132	ALDH3A2	60.5	1	0
∆F508 + MG132	VAPB	29.5	1	0
∆F508 + MG132	ATP2B1	25.25	1	0
∆F508 + MG132	MAGED1	7.75	0.98	0
∆F508 + MG132	BTF3L4	6.5	0.93	0.01
∆F508 + MG132	NME1	10	1	0
∆F508 + MG132	YIF1B	4	1	0
∆F508 + MG132	STX5	12.75	1	0
∆F508 + MG132	COG2	3	0.96	0.01
∆F508 + MG132	2022-03-06	2.75	0.98	0
∆F508 + MG132	UBQLN2	4	1	0
∆F508 + MG132	MKLN1	3.5	0.96	0.01
∆F508 + MG132	FKBP5	2.75	0.96	0.01
∆F508 + MG132	SLC30A6	4.5	0.98	0
∆F508 + MG132	SSR1	6.25	0.97	0
∆F508 + MG132	SAR1B	6.25	0.99	0
∆F508 + MG132	DMD	5.5	1	0
∆F508 + MG132	NUP210	3.25	0.97	0.01
∆F508 + MG132	TMEM38B	4.75	0.97	0.01
∆F508 + MG132	MIA3	2	0.95	0.01
∆F508 + MG132	TAP2	2.75	0.97	0.01
∆F508 + MG132	BID	5	0.99	0
∆F508 + MG132	CLGN	3	0.98	0
∆F508 + MG132	SLC38A2	16.75	1	0
∆F508 + MG132	L2HGDH	2.75	0.98	0
∆F508 + MG132	TPT1	3	0.92	0.01
∆F508 + MG132	UBE4A	2.75	0.93	0.01
∆F508 + MG132	CNNM4	3	0.98	0
∆F508 + MG132	MCL1	3	0.98	0
∆F508 + MG132	TMEM43	4.25	0.95	0.01
∆F508 + MG132	C19orf25	3.25	0.97	0
∆F508 + MG132	SPCS1	2.25	0.96	0.01
∆F508 + MG132	BRI3BP	3	0.94	0.01
∆F508 + MG132	VMP1	6.25	0.95	0.01
∆F508 + MG132	ATP6V0C	10	1	0
∆F508 + MG132	CISD1	3	0.98	0
∆F508 + MG132	PPP5C	2.5	0.97	0.01
∆F508 + MG132	VMA21	10.75	1	0
∆F508 + MG132	TMEM205	2	0.95	0.01
∆F508 + MG132	PANX1	3.75	0.98	0
∆F508 + MG132	ZMYM6NB	4	1	0
∆F508 + MG132	TRABD	3	0.98	0
∆F508 + MG132	OAS3	5.75	0.94	0.01
∆F508 + MG132	ABCC9	2.75	0.96	0.01
∆F508 + MG132	MTHFD2	2	0.95	0.01
∆F508 + MG132	KCNJ8	3.25	0.98	0
∆F508 + MG132	TMEM106C	2.5	0.97	0.01
∆F508 + MG132	HECTD2	4.25	1	0
∆F508 + MG132	ZNF74	2.75	0.97	0.01
∆F508 + MG132	AOX1	4.25	0.99	0
∆F508 + MG132	KIAA0319	2.75	0.98	0
∆F508 + MG132	DNAJA4	2.75	0.97	0.01
∆F508 + MG132	UBE2G2	5.5	1	0
∆F508 + MG132	ABCC3	44	0.98	0
∆F508 + MG132	ABTB2	2.75	0.98	0
∆F508 + MG132	EN1	3	0.99	0
∆F508 + MG132-Orkambi	BioID_SpikeTide	53.75	1	0
∆F508 + MG132-Orkambi	SAV_STRAV	625	1	0
∆F508 + MG132-Orkambi	ISOC1	10	1	0
∆F508 + MG132-Orkambi	ACBD5	10.5	1	0
∆F508 + MG132-Orkambi	SUN1	4.75	1	0
∆F508 + MG132-Orkambi	TIMM13	3.75	0.98	0
∆F508 + MG132-Orkambi	UBB	42.25	1	0
∆F508 + MG132-Orkambi	HSPBP1	6.5	1	0
∆F508 + MG132-Orkambi	SPCS3	13.5	1	0
∆F508 + MG132-Orkambi	SLC38A1	3.5	0.97	0.01
∆F508 + MG132-Orkambi	FAM177A1	3	0.98	0
∆F508 + MG132-Orkambi	SRRM2	9.25	0.94	0.01
∆F508 + MG132-Orkambi	FNDC3A	12.5	1	0
∆F508 + MG132-Orkambi	POR	19.25	1	0
∆F508 + MG132-Orkambi	DDRGK1	49.25	1	0
∆F508 + MG132-Orkambi	DCTPP1	7	0.99	0
∆F508 + MG132-Orkambi	TMEM43	7.75	1	0
∆F508 + MG132-Orkambi	ABCC1	4	0.99	0
∆F508 + MG132-Orkambi	EIF2AK3	11.25	0.99	0
∆F508 + MG132-Orkambi	SLC25A21	4	0.94	0.01
∆F508 + MG132-Orkambi	SERPINB1	7.75	1	0
∆F508 + MG132-Orkambi	CLCN7	5.25	0.99	0
∆F508 + MG132-Orkambi	PSMF1	2.5	0.97	0.01
∆F508 + MG132-Orkambi	FAM213A	5.25	0.99	0
∆F508 + MG132-Orkambi	ANKLE2	23.75	1	0
∆F508 + MG132-Orkambi	ATP6AP2	22.5	1	0
∆F508 + MG132-Orkambi	C19orf25	4.75	0.99	0
∆F508 + MG132-Orkambi	VEZT	18.25	1	0
∆F508 + MG132-Orkambi	C19orf6	6.25	1	0
∆F508 + MG132-Orkambi	SORD	4.25	1	0
∆F508 + MG132-Orkambi	SPCS2	19.25	1	0
∆F508 + MG132-Orkambi	UQCRFS1	17.75	0.97	0.01
∆F508 + MG132-Orkambi	TRIM13	64.25	1	0
∆F508 + MG132-Orkambi	GOSR2	3.5	0.99	0
∆F508 + MG132-Orkambi	ATP13A1	8.75	0.98	0
∆F508 + MG132-Orkambi	ATP6AP1	24.75	1	0
∆F508 + MG132-Orkambi	ADI1	6	1	0
∆F508 + MG132-Orkambi	CCDC47	57.25	1	0
∆F508 + MG132-Orkambi	VAT1	8.5	0.99	0
∆F508 + MG132-Orkambi	HMOX2	17.5	1	0
∆F508 + MG132-Orkambi	PPP1R15B	7.5	1	0
∆F508 + MG132-Orkambi	MFN2	3.25	0.97	0
∆F508 + MG132-Orkambi	SACM1L	5.5	1	0
∆F508 + MG132-Orkambi	SPCS1	3	0.98	0
∆F508 + MG132-Orkambi	ATP6V0A1	6	1	0
∆F508 + MG132-Orkambi	CLGN	3.75	1	0
∆F508 + MG132-Orkambi	HMGCR	6.25	1	0
∆F508 + MG132-Orkambi	CKAP4	72	1	0
∆F508 + MG132-Orkambi	ST13	15	1	0
∆F508 + MG132-Orkambi	AIP	5.5	1	0
∆F508 + MG132-Orkambi	ATP6V1F	7.5	0.96	0.01
∆F508 + MG132-Orkambi	ATF6B	5.5	1	0
∆F508 + MG132-Orkambi	PIP5K1A	4.75	1	0
∆F508 + MG132-Orkambi	EPHX1	8.75	1	0
∆F508 + MG132-Orkambi	GRAMD1A	6	0.97	0
∆F508 + MG132-Orkambi	STIM1	16.75	1	0
∆F508 + MG132-Orkambi	MCTS1	10.75	0.97	0.01
∆F508 + MG132-Orkambi	BCAP31	9.75	1	0
∆F508 + MG132-Orkambi	UCHL1	13.25	1	0
∆F508 + MG132-Orkambi	PSMC3	50.25	1	0
∆F508 + MG132-Orkambi	DNAJC1	7	1	0
∆F508 + MG132-Orkambi	AGPAT9	25.5	1	0
∆F508 + MG132-Orkambi	OSBPL2	2.5	0.94	0.01
∆F508 + MG132-Orkambi	MAGT1	11	1	0
∆F508 + MG132-Orkambi	ANO6	9.25	1	0
∆F508 + MG132-Orkambi	ANXA11	5.5	0.97	0
∆F508 + MG132-Orkambi	PSMB3	13.5	1	0
∆F508 + MG132-Orkambi	PSMB4	16.5	1	0
∆F508 + MG132-Orkambi	TMEM199	14	1	0
∆F508 + MG132-Orkambi	DNAJC18	4.25	1	0
∆F508 + MG132-Orkambi	UFSP2	3	0.97	0.01
∆F508 + MG132-Orkambi	SLC27A2	10.25	1	0
∆F508 + MG132-Orkambi	PSMA6	7	1	0
∆F508 + MG132-Orkambi	UFD1L	45	1	0
∆F508 + MG132-Orkambi	UBXN4	36.75	1	0
∆F508 + MG132-Orkambi	C20orf3	5.5	0.92	0.01
∆F508 + MG132-Orkambi	FAF2	20.25	1	0
∆F508 + MG132-Orkambi	SNX14	3.5	0.99	0
∆F508 + MG132-Orkambi	ALDH2	4.75	0.97	0.01
∆F508 + MG132-Orkambi	TMEM48	32	1	0
∆F508 + MG132-Orkambi	MRPL12	4.75	0.98	0
∆F508 + MG132-Orkambi	NUP210	3	0.96	0.01
∆F508 + MG132-Orkambi	MMGT1	6.5	1	0
∆F508 + MG132-Orkambi	SRPRB	15.75	0.99	0
∆F508 + MG132-Orkambi	PGRMC2	50.25	0.98	0
∆F508 + MG132-Orkambi	ECI1	9	0.97	0.01
∆F508 + MG132-Orkambi	PDZD8	9.5	1	0
∆F508 + MG132-Orkambi	CYB5A	2.25	0.96	0.01
∆F508 + MG132-Orkambi	SLC33A1	10	1	0
∆F508 + MG132-Orkambi	PEX19	23	1	0
∆F508 + MG132-Orkambi	AGPAT6	14.5	1	0
∆F508 + MG132-Orkambi	AK2	8.5	0.92	0.01
∆F508 + MG132-Orkambi	SUN2	5	1	0
∆F508 + MG132-Orkambi	FAM158A	9	1	0
∆F508 + MG132-Orkambi	TMEM57	9.75	1	0
∆F508 + MG132-Orkambi	NDUFS1	12.5	0.99	0
∆F508 + MG132-Orkambi	AUP1	15.25	1	0
∆F508 + MG132-Orkambi	SGPL1	8.75	1	0
∆F508 + MG132-Orkambi	UBE4A	4.5	0.99	0
∆F508 + MG132-Orkambi	PRDX3	34	1	0
∆F508 + MG132-Orkambi	SELS	2.75	0.98	0
∆F508 + MG132-Orkambi	RAB7A	22.5	1	0
∆F508 + MG132-Orkambi	HSPA6	123.75	1	0
∆F508 + MG132-Orkambi	SLC12A2	7.25	1	0
∆F508 + MG132-Orkambi	SSBP1	5.5	1	0
∆F508 + MG132-Orkambi	UBE2J1	13	1	0
∆F508 + MG132-Orkambi	STOM	4.25	1	0
∆F508 + MG132-Orkambi	SEC22B	20.25	1	0
∆F508 + MG132-Orkambi	KIAA1715	4	1	0
∆F508 + MG132-Orkambi	ACADVL	6	0.98	0
∆F508 + MG132-Orkambi	PDE3B	3	0.97	0.01
∆F508 + MG132-Orkambi	USP33	10	1	0
∆F508 + MG132-Orkambi	LPCAT3	5.25	0.93	0.01
∆F508 + MG132-Orkambi	CAMLG	10.75	0.95	0.01
∆F508 + MG132-Orkambi	CSTB	20.75	1	0
∆F508 + MG132-Orkambi	DGKE	6.25	1	0
∆F508 + MG132-Orkambi	FKBP4	31.25	1	0
∆F508 + MG132-Orkambi	KDSR	5.5	1	0
∆F508 + MG132-Orkambi	HPRT1	15	0.99	0
∆F508 + MG132-Orkambi	HSPB1	11.25	0.97	0.01
∆F508 + MG132-Orkambi	DEGS1	5.25	0.99	0
∆F508 + MG132-Orkambi	PEX13	3	0.98	0
∆F508 + MG132-Orkambi	PEX3	12.5	1	0
∆F508 + MG132-Orkambi	PSMA2	11.25	0.99	0
∆F508 + MG132-Orkambi	PSMB1	14.5	1	0
∆F508 + MG132-Orkambi	PSMB7	2.75	0.97	0.01
∆F508 + MG132-Orkambi	PTPN1	38.25	1	0
∆F508 + MG132-Orkambi	RCN1	5.75	1	0
∆F508 + MG132-Orkambi	TTC1	7.25	0.97	0.01
∆F508 + MG132-Orkambi	EMD	54	1	0
∆F508 + MG132-Orkambi	C19orf63	10	1	0
∆F508 + MG132-Orkambi	ADA	5.25	1	0
∆F508 + MG132-Orkambi	COPB2	13.25	1	0
∆F508 + MG132-Orkambi	CYB5R1	3	0.97	0
∆F508 + MG132-Orkambi	BET1	19.5	1	0
∆F508 + MG132-Orkambi	UBXN8	22.75	1	0
∆F508 + MG132-Orkambi	LMAN1	33.75	1	0
∆F508 + MG132-Orkambi	ADCY9	25.5	1	0
∆F508 + MG132-Orkambi	FKBP8	12.75	0.96	0.01
∆F508 + MG132-Orkambi	ARL6IP5	16.75	0.99	0
∆F508 + MG132-Orkambi	ITGA5	4	1	0
∆F508 + MG132-Orkambi	CISD2	18	1	0
∆F508 + MG132-Orkambi	ATF6	13.25	1	0
∆F508 + MG132-Orkambi	SLC30A9	4.25	0.98	0
∆F508 + MG132-Orkambi	PGRMC1	28.25	0.97	0
∆F508 + MG132-Orkambi	SCAMP2	3.5	0.99	0
∆F508 + MG132-Orkambi	YKT6	88	0.99	0
∆F508 + MG132-Orkambi	STIP1	32.5	1	0
∆F508 + MG132-Orkambi	CHP	7.25	1	0
∆F508 + MG132-Orkambi	SEC63	29	1	0
∆F508 + MG132-Orkambi	RABL3	9.5	0.97	0
∆F508 + MG132-Orkambi	RINT1	7.5	0.96	0.01
∆F508 + MG132-Orkambi	VANGL2	10.75	1	0
∆F508 + MG132-Orkambi	VMA21	16.25	1	0
∆F508 + MG132-Orkambi	TMEM209	27.5	1	0
∆F508 + MG132-Orkambi	IMPDH2	16.25	0.99	0
∆F508 + MG132-Orkambi	LETM1	6.5	1	0
∆F508 + MG132-Orkambi	PITPNB	5.25	1	0
∆F508 + MG132-Orkambi	PREB	31.25	1	0
∆F508 + MG132-Orkambi	MCAM	4.75	1	0
∆F508 + MG132-Orkambi	STOML2	34.25	0.99	0
∆F508 + MG132-Orkambi	ADAM17	8.5	1	0
∆F508 + MG132-Orkambi	SAR1B	11.5	1	0
∆F508 + MG132-Orkambi	UBL4A	5.5	1	0
∆F508 + MG132-Orkambi	TTC35	69.25	1	0
∆F508 + MG132-Orkambi	TMEM85	14.25	1	0
∆F508 + MG132-Orkambi	DHRS7	29.75	1	0
∆F508 + MG132-Orkambi	CYB5B	10	1	0
∆F508 + MG132-Orkambi	STX18	13.25	1	0
∆F508 + MG132-Orkambi	PRR11	6.5	1	0
∆F508 + MG132-Orkambi	TMEM38B	6.25	0.99	0
∆F508 + MG132-Orkambi	TMEM111	68.5	1	0
∆F508 + MG132-Orkambi	CISD1	3.5	0.99	0
∆F508 + MG132-Orkambi	USE1	10.75	1	0
∆F508 + MG132-Orkambi	CDKAL1	38.75	1	0
∆F508 + MG132-Orkambi	VAPA	44.75	0.99	0
∆F508 + MG132-Orkambi	C15orf24	34.25	1	0
∆F508 + MG132-Orkambi	SMPD4	62.75	1	0
∆F508 + MG132-Orkambi	PPIA	51.75	1	0
∆F508 + MG132-Orkambi	MCL1	3	0.98	0
∆F508 + MG132-Orkambi	CLCC1	17.25	1	0
∆F508 + MG132-Orkambi	ST7	4.5	0.98	0
∆F508 + MG132-Orkambi	ALG9	5.25	1	0
∆F508 + MG132-Orkambi	OCIAD1	34.25	1	0
∆F508 + MG132-Orkambi	AAAS	12.5	1	0
∆F508 + MG132-Orkambi	ISOC2	41.75	1	0
∆F508 + MG132-Orkambi	C1orf43	19	1	0
∆F508 + MG132-Orkambi	GPR89A	21.25	1	0
∆F508 + MG132-Orkambi	BAG6	14.75	1	0
∆F508 + MG132-Orkambi	BNIP1	8	1	0
∆F508 + MG132-Orkambi	RDH11	5.25	1	0
∆F508 + MG132-Orkambi	HSPA1L	476.25	0.98	0
∆F508 + MG132-Orkambi	RAB11B	13	0.93	0.01
∆F508 + MG132-Orkambi	TEX264	13.25	1	0
∆F508 + MG132-Orkambi	VRK2	36	1	0
∆F508 + MG132-Orkambi	ITGB1	8.25	0.98	0
∆F508 + MG132-Orkambi	RAB34	6.75	0.91	0.01
∆F508 + MG132-Orkambi	VANGL1	18.5	1	0
∆F508 + MG132-Orkambi	ATP1A1	49	0.94	0.01
∆F508 + MG132-Orkambi	SLC30A6	6.25	1	0
∆F508 + MG132-Orkambi	SLC6A8	6	0.99	0
∆F508 + MG132-Orkambi	KIAA0090	179	1	0
∆F508 + MG132-Orkambi	MOSPD2	13.75	1	0
∆F508 + MG132-Orkambi	PSMA1	10	1	0
∆F508 + MG132-Orkambi	PSMA5	8	1	0
∆F508 + MG132-Orkambi	HM13	16	0.93	0.01
∆F508 + MG132-Orkambi	SRPR	22	0.91	0.01
∆F508 + MG132-Orkambi	PSMC5	70.25	0.98	0
∆F508 + MG132-Orkambi	ATP2A2	132	0.94	0.01
∆F508 + MG132-Orkambi	HLA-A	10.5	1	0
∆F508 + MG132-Orkambi	HLA-C	2.75	0.97	0.01
∆F508 + MG132-Orkambi	LMNA	24.75	1	0
∆F508 + MG132-Orkambi	SLC9A1	11.5	1	0
∆F508 + MG132-Orkambi	GSR	3.5	0.99	0
∆F508 + MG132-Orkambi	EIF6	8.75	0.99	0
∆F508 + MG132-Orkambi	ACTA2	10.5	0.93	0.01
∆F508 + MG132-Orkambi	SLC6A15	12.25	0.91	0.01
∆F508 + MG132-Orkambi	PKMYT1	3.5	0.99	0
∆F508 + MG132-Orkambi	MYH10	34.25	1	0
∆F508 + MG132-Orkambi	FAM49B	6.25	0.99	0
∆F508 + MG132-Orkambi	SLC4A7	21.25	0.98	0
∆F508 + MG132-Orkambi	TOR1AIP1	23.5	0.98	0
∆F508 + MG132-Orkambi	SLC27A4	11.5	1	0
∆F508 + MG132-Orkambi	ABCB1	8.75	1	0
∆F508 + MG132-Orkambi	ACSL3	24.5	1	0
∆F508 + MG132-Orkambi	CBR1	13.25	1	0
∆F508 + MG132-Orkambi	CYP51A1	26.75	1	0
∆F508 + MG132-Orkambi	ENO2	4.75	0.99	0
∆F508 + MG132-Orkambi	HSD17B4	14.25	1	0
∆F508 + MG132-Orkambi	PGK1	4	0.99	0
∆F508 + MG132-Orkambi	PSMA7	14.25	0.99	0
∆F508 + MG132-Orkambi	PSMB5	10.25	1	0
∆F508 + MG132-Orkambi	PSMD12	32.5	1	0
∆F508 + MG132-Orkambi	ABCD3	92.5	0.99	0
∆F508 + MG132-Orkambi	ALDH3A2	77.75	1	0
∆F508 + MG132-Orkambi	ACP1	5	1	0
∆F508 + MG132-Orkambi	VAPB	50.75	1	0
∆F508 + MG132-Orkambi	ATP2B1	28.25	1	0
∆F508 + MG132-Orkambi	SOAT1	8.75	1	0
∆F508 + MG132-Orkambi	EIF1	6	1	0
∆F508 + MG132-Orkambi	COX4NB	33.75	1	0
∆F508 + MG132-Orkambi	SPTLC1	5.5	0.99	0
∆F508 + MG132-Orkambi	BTF3L4	8.75	0.99	0
∆F508 + MG132-Orkambi	SLC3A2	29.25	1	0
∆F508 + MG132-Orkambi	PCK2	7.25	0.97	0.01
∆F508 + MG132-Orkambi	PRDX5	17.25	1	0
∆F508 + MG132-Orkambi	TAP2	3.25	0.98	0
∆F508 + MG132-Orkambi	DYNLRB1	12	0.92	0.01
∆F508 + MG132-Orkambi	YIF1B	4.75	1	0
∆F508 + MG132-Orkambi	DDX19A	4	0.93	0.01
∆F508 + MG132-Orkambi	STX5	14.25	1	0
∆F508 + MG132-Orkambi	UGGT1	3.25	0.97	0
∆F508 + MG132-Orkambi	AHCY	19.75	0.94	0.01
∆F508 + MG132-Orkambi	SAR1A	17.75	0.92	0.01
∆F508 + MG132-Orkambi	PTPLB	2.5	0.97	0.01
∆F508 + MG132-Orkambi	DUSP3	2.5	0.97	0.01
∆F508 + MG132-Orkambi	SGTA	3.5	0.99	0
∆F508 + MG132-Orkambi	BAG5	3.75	0.99	0
∆F508 + MG132-Orkambi	VMP1	13	1	0
∆F508 + MG132-Orkambi	UBQLN2	4.75	1	0
∆F508 + MG132-Orkambi	OSGEP	2.5	0.92	0.01
∆F508 + MG132-Orkambi	DMD	4.5	1	0
∆F508 + MG132-Orkambi	UBE2G2	7.25	1	0
∆F508 + MG132-Orkambi	WLS	3.25	0.93	0.01
∆F508 + MG132-Orkambi	ATP6V0C	10.5	1	0
∆F508 + MG132-Orkambi	UBXN2A	4.25	0.91	0.01
∆F508 + MG132-Orkambi	LPGAT1	4.75	0.98	0
∆F508 + MG132-Orkambi	GHDC	2.25	0.96	0.01
∆F508 + MG132-Orkambi	ITPR3	3.5	0.98	0
∆F508 + MG132-Orkambi	GGCX	2.5	0.97	0.01
∆F508 + MG132-Orkambi	PPP5C	2.25	0.96	0.01
∆F508 + MG132-Orkambi	C20orf30	5.25	1	0
∆F508 + MG132-Orkambi	GLRX5	2.5	0.97	0.01
∆F508 + MG132-Orkambi	TMEM205	2.25	0.96	0.01
∆F508 + MG132-Orkambi	TOMM70A	2	0.95	0.01
∆F508 + MG132-Orkambi	YIF1A	3.25	0.93	0.01
∆F508 + MG132-Orkambi	COMT	2.5	0.97	0.01
∆F508 + MG132-Orkambi	CSNK1A1L	2.75	0.96	0.01
∆F508 + MG132-Orkambi	PPM1L	2.25	0.96	0.01
∆F508 + MG132-Orkambi	ABHD12	3	0.98	0
∆F508 + MG132-Orkambi	SREBF2	3	0.98	0
∆F508 + MG132-Orkambi	MGST2	2	0.95	0.01
∆F508 + MG132-Orkambi	TMED2	4	0.94	0.01
∆F508 + MG132-Orkambi	LRRC57	2	0.94	0.01
∆F508 + MG132-Orkambi	YRDC	2.5	0.91	0.01
∆F508 + MG132-Orkambi	TMEM93	10.5	1	0
∆F508 + MG132-Orkambi	CEPT1	7.5	0.98	0
∆F508 + MG132-Orkambi	TMX2	4.75	1	0
∆F508 + MG132-Orkambi	PSMA3	3.25	0.97	0
∆F508 + MG132-Orkambi	BRI3BP	4.75	0.98	0
∆F508 + MG132-Orkambi	EN1	3.5	0.99	0
∆F508 + MG132-Orkambi	KIAA0319	3.25	0.99	0
∆F508	TIMM13	6.67	1	0
∆F508	TAF4	6.33	0.9	0.01
∆F508	SPCS3	9	0.96	0.01
∆F508	POR	10.33	0.98	0
∆F508	ATP6AP2	7	1	0
∆F508	TMX1	6.67	0.94	0.01
∆F508	SPCS2	4.33	0.94	0.01
∆F508	SSR1	8.67	0.98	0
∆F508	COX5B	7.33	1	0
∆F508	ATP6AP1	6	0.99	0
∆F508	CCDC47	62	1	0
∆F508	SLC25A19	4.33	0.89	0.01
∆F508	TFRC	9	0.99	0
∆F508	HADHA	25	0.88	0.01
∆F508	EPHX1	5.33	1	0
∆F508	PITHD1	3	0.98	0
∆F508	AGPAT9	5.67	1	0
∆F508	SLC27A2	3.33	0.98	0
∆F508	UBXN4	16.33	0.99	0
∆F508	MRPL12	4	0.96	0.01
∆F508	MMGT1	5.33	1	0
∆F508	AGPAT6	5.67	0.99	0
∆F508	GSR	6.33	1	0
∆F508	FAM158A	18.67	1	0
∆F508	SLC35F2	4	0.98	0
∆F508	PPP5C	2.67	0.97	0
∆F508	RAB7A	27.67	1	0
∆F508	COX4I1	10.33	0.98	0
∆F508	RRP1	5.67	1	0
∆F508	HADHB	15.33	1	0
∆F508	C19orf63	9	1	0
∆F508	COX4NB	25.67	1	0
∆F508	PRAF2	7	0.9	0.01
∆F508	SLC3A2	11	0.99	0
∆F508	VMA21	10	1	0
∆F508	LETM1	4.67	1	0
∆F508	PREB	12.33	0.96	0.01
∆F508	TTC35	44.67	1	0
∆F508	TMEM85	13.67	1	0
∆F508	DHRS7	13.67	1	0
∆F508	DNAJB11	5.33	0.94	0.01
∆F508	TMEM111	43	1	0
∆F508	C15orf24	28.67	1	0
∆F508	MYH10	56	0.93	0.01
∆F508	TRIM13	11.33	1	0
∆F508	VRK2	13	0.96	0.01
∆F508	ITGB1	6.67	0.94	0.01
∆F508	C1orf226	5.67	0.99	0
∆F508	KIAA0090	145.67	1	0
∆F508	HLA-A	4.67	0.89	0.01
∆F508	NOS1AP	5.67	0.99	0
∆F508	GLS	2.33	0.88	0.01
∆F508	UQCRB	5	1	0
∆F508	UBE2J1	4.67	0.92	0.01
∆F508	IDH3A	3	0.99	0
∆F508	SAR1B	7.67	0.99	0
∆F508	MTHFD2	2.33	0.88	0.01
∆F508	TEX264	2.33	0.99	0
∆F508	PRDX4	6.33	1	0
∆F508	TMEM199	3	0.99	0
∆F508	SCD5	2.33	0.97	0
∆F508	LMAN2	2.33	0.97	0
∆F508	ZNF74	5	1	0
∆F508 - Orkambi	TIMM13	8.67	1	0
∆F508 - Orkambi	HSPBP1	6	0.98	0
∆F508 - Orkambi	SPCS3	10.33	0.99	0
∆F508 - Orkambi	SCAMP1	29	0.99	0
∆F508 - Orkambi	POR	20.67	1	0
∆F508 - Orkambi	DDRGK1	13.33	0.94	0.01
∆F508 - Orkambi	C1orf226	35.33	1	0
∆F508 - Orkambi	ATP6AP2	10.33	1	0
∆F508 - Orkambi	AGPAT1	10.67	1	0
∆F508 - Orkambi	TMX1	7.67	0.96	0.01
∆F508 - Orkambi	FIS1	4	0.99	0
∆F508 - Orkambi	GLS	2.67	0.92	0.01
∆F508 - Orkambi	SPCS2	7.67	0.97	0
∆F508 - Orkambi	SSR1	10.67	1	0
∆F508 - Orkambi	COX5B	5.67	1	0
∆F508 - Orkambi	STX7	13	0.97	0.01
∆F508 - Orkambi	ATP6AP1	13.67	1	0
∆F508 - Orkambi	CCDC47	57.33	1	0
∆F508 - Orkambi	VAT1	7.67	1	0
∆F508 - Orkambi	HMOX2	9.33	0.9	0.01
∆F508 - Orkambi	TFRC	23	1	0
∆F508 - Orkambi	SCP2	4.67	1	0
∆F508 - Orkambi	HADHA	26.67	0.99	0
∆F508 - Orkambi	VANGL1	8.33	0.93	0.01
∆F508 - Orkambi	EPHX1	6.67	1	0
∆F508 - Orkambi	SLC38A2	19.67	1	0
∆F508 - Orkambi	DNAJC1	2.33	0.97	0
∆F508 - Orkambi	AGPAT9	9	1	0
∆F508 - Orkambi	CPD	9.33	0.93	0.01
∆F508 - Orkambi	NDUFV2	8.33	1	0
∆F508 - Orkambi	UBXN4	21.33	1	0
∆F508 - Orkambi	TMEM48	8.33	0.92	0.01
∆F508 - Orkambi	MRPL12	7	1	0
∆F508 - Orkambi	MMGT1	7	1	0
∆F508 - Orkambi	STX12	6.67	0.98	0
∆F508 - Orkambi	SLC33A1	6	0.97	0
∆F508 - Orkambi	DCXR	6.67	1	0
∆F508 - Orkambi	AGPAT6	9.67	1	0
∆F508 - Orkambi	GSR	3.33	1	0
∆F508 - Orkambi	EXOC3	32	1	0
∆F508 - Orkambi	FAM158A	19.33	1	0
∆F508 - Orkambi	SLC35F2	11.67	1	0
∆F508 - Orkambi	OCLN	10.67	1	0
∆F508 - Orkambi	PODXL	4	0.99	0
∆F508 - Orkambi	RAB7A	31.67	1	0
∆F508 - Orkambi	UBE2J1	5	0.92	0.01
∆F508 - Orkambi	ATP1B3	10.33	0.88	0.01
∆F508 - Orkambi	RRP1	3.67	0.93	0.01
∆F508 - Orkambi	HADHB	14.67	1	0
∆F508 - Orkambi	RCN1	4.67	0.95	0.01
∆F508 - Orkambi	RRM1	11.67	1	0
∆F508 - Orkambi	STX10	6.67	0.98	0
∆F508 - Orkambi	UMPS	3.67	0.9	0.01
∆F508 - Orkambi	EMD	45	0.91	0.01
∆F508 - Orkambi	C19orf63	10.33	1	0
∆F508 - Orkambi	COX6C	2	0.96	0.01
∆F508 - Orkambi	LMAN1	4.33	0.9	0.01
∆F508 - Orkambi	STX6	5.33	1	0
∆F508 - Orkambi	ADCY9	10.67	1	0
∆F508 - Orkambi	COX4NB	33	1	0
∆F508 - Orkambi	ARL6IP5	25	1	0
∆F508 - Orkambi	STEAP3	6.33	1	0
∆F508 - Orkambi	CISD2	11.67	1	0
∆F508 - Orkambi	SCAMP2	3	0.99	0
∆F508 - Orkambi	CHP	4.33	1	0
∆F508 - Orkambi	PRAF2	13	1	0
∆F508 - Orkambi	SLC3A2	26.33	1	0
∆F508 - Orkambi	RABL3	6.33	0.96	0.01
∆F508 - Orkambi	VMA21	12	1	0
∆F508 - Orkambi	FDFT1	6.33	0.99	0
∆F508 - Orkambi	LETM1	4	0.97	0
∆F508 - Orkambi	PREB	32	1	0
∆F508 - Orkambi	SAR1B	10.33	1	0
∆F508 - Orkambi	TTC35	54	1	0
∆F508 - Orkambi	TMEM85	13.67	1	0
∆F508 - Orkambi	DHRS7	19.67	1	0
∆F508 - Orkambi	DNAJB11	5	0.96	0.01
∆F508 - Orkambi	FAM134B	3.33	0.98	0
∆F508 - Orkambi	SRSF5	4	0.97	0.01
∆F508 - Orkambi	TMEM111	39	1	0
∆F508 - Orkambi	TMED10	10.33	0.95	0.01
∆F508 - Orkambi	C15orf24	28.33	1	0
∆F508 - Orkambi	SMPD4	5.33	0.96	0.01
∆F508 - Orkambi	MYH10	18	1	0
∆F508 - Orkambi	AAAS	9.33	0.91	0.01
∆F508 - Orkambi	UBE2K	5	1	0
∆F508 - Orkambi	TRIM13	20.67	1	0
∆F508 - Orkambi	GK	4.33	0.89	0.01
∆F508 - Orkambi	RAB11B	15	0.97	0.01
∆F508 - Orkambi	TEX264	6.33	1	0
∆F508 - Orkambi	SLC9A3R2	13	1	0
∆F508 - Orkambi	VRK2	19	0.99	0
∆F508 - Orkambi	ITGB1	16.33	1	0
∆F508 - Orkambi	TMEM2	7	1	0
∆F508 - Orkambi	ANO6	3.33	0.98	0
∆F508 - Orkambi	SLC6A8	15.67	1	0
∆F508 - Orkambi	KIAA0090	167.33	1	0
∆F508 - Orkambi	TMEM199	3.67	1	0
∆F508 - Orkambi	MOSPD2	2.67	0.98	0
∆F508 - Orkambi	HLA-A	6.67	0.88	0.01
∆F508 - Orkambi	HLA-C	2.67	0.98	0
∆F508 - Orkambi	NOS1AP	33	1	0
∆F508 - Orkambi	DNAJC7	16.33	0.99	0
∆F508 - Orkambi	ARL13B	8.33	1	0
∆F508 - Orkambi	PRDX5	5	0.9	0.01
∆F508 - Orkambi	SLC6A15	18	0.97	0
∆F508 - Orkambi	CXADR	3.33	0.99	0
∆F508 - Orkambi	HSD17B4	19.67	1	0
∆F508 - Orkambi	UQCRB	5.67	1	0
∆F508 - Orkambi	EI24	2.67	0.99	0
∆F508 - Orkambi	ERP29	2.33	0.97	0
∆F508 - Orkambi	LRP8	11	1	0
∆F508 - Orkambi	PCK2	3.33	0.9	0.01
∆F508 - Orkambi	SEC61B	2.33	0.99	0
∆F508 - Orkambi	VANGL2	4	0.99	0
∆F508 - Orkambi	PKMYT1	2.67	0.98	0
∆F508 - Orkambi	IDH3A	4.33	1	0
∆F508 - Orkambi	SFT2D1	3	0.98	0
∆F508 - Orkambi	ATP6V0C	3.67	0.91	0.01
∆F508 - Orkambi	KDSR	2	0.96	0.01
∆F508 - Orkambi	IBA57	3.33	1	0
∆F508 - Orkambi	SEMA4C	6	1	0
∆F508 - Orkambi	LAMC2	3.67	0.92	0.01
∆F508 - Orkambi	EBP	4.33	0.93	0.01
∆F508 - Orkambi	TMEM93	8.67	1	0
∆F508 - Orkambi	ICMT	3.67	0.93	0.01
∆F508 - Orkambi	ZNF74	5.33	1	0
