# Supplementary material for: Proximity Profiling of the CFTR Interaction Landscape in Response to Orkambi
Source: Int J Mol Sci. 2022 Feb 23;23(5):2442. doi: 10.3390/ijms23052442 (PMC8910062; doi:10.3390/ijms23052442)
Supplement: Supplementary file 1 [file ijms-23-02442-s001.zip › SuppDataset6.xlsx]

## Sheet: WT to F508 log2FC
WT to F508 log2FC
PreyGene	Fold Change
birA	-9.86027
PC	-9.69998
HSPA1L	-7.97917
PCCA	-7.56308
PCCB	-7.48934
HSPA1B	-7.40782
MCCC2	-7.33025
ACACA	-7.02974
YKT6	-6.86992
VIM	-6.8365
VCP	-6.7784
MLLT4	-6.54427
FERMT2	-6.30378
TCP1	-6.27138
MCAM	-6.06609
ERBB2IP	-6.03716
TMPO	-6.02036
TUBB	-6.00929
TTC35	-5.97521
KIAA0090	-5.95739
LRBA	-5.90806
DLG1	-5.90689
SLC3A2	-5.88632
WWOX	-5.88632
TUFM	-5.81739
DHPS	-5.75489
RPN2	-5.71104
HSPA8	-5.70736
PPP2R1A	-5.6971
RDX	-5.66306
COPG2	-5.65813
AHNAK	-5.58248
TMEM2	-5.56468
TMEM111	-5.53311
SLC38A2	-5.50338
SND1	-5.50338
TIPRL	-5.50338
KIAA1274	-5.49185
RPL9	-5.47602
APPL2	-5.45943
TXNL1	-5.43667
VPS45	-5.38094
WDR11	-5.37856
FAM135A	-5.35755
DST	-5.34589
TLN1	-5.33462
ATP5A1	-5.32092
TAGLN2	-5.31596
VRK2	-5.29814
GAPDH	-5.29774
PTBP1	-5.2703
SLC4A7	-5.26074
XPO1	-5.24192
XRCC6	-5.24192
RPS2	-5.22882
SCRIB	-5.21297
EIF4A1	-5.20593
SRPR	-5.18342
STX6	-5.16993
RPS7	-5.15644
ZBTB33	-5.14316
SLC12A2	-5.133
TRAP1	-5.09097
HSPD1	-5.07015
RUVBL1	-5.04801
YES1	-5.04439
VDAC2	-5.02587
TRIM28	-5.00372
VANGL2	-4.98505
ZC3HAV1	-4.98089
UQCRC2	-4.96185
SCAMP1	-4.96059
FAM21A	-4.9542
SLC25A5	-4.93258
HSP90AB1	-4.92292
LPHN2	-4.92267
NMT1	-4.9135
VDAC1	-4.9135
TFRC	-4.90689
ATP5B	-4.87745
RAI14	-4.87431
PRPF8	-4.87398
SLC1A5	-4.86511
RPS3	-4.86011
PKM2	-4.84576
2022-09-02	-4.84147
TOMM40	-4.8365
PSMC3	-4.81474
PSMD3	-4.81084
SNRNP200	-4.79803
VAPB	-4.79803
RAB11FIP5	-4.79025
UBXN4	-4.7851
XPOT	-4.7851
SLC25A13	-4.78136
PVRL2	-4.77241
SNX9	-4.75489
NCL	-4.752
TOMM22	-4.7314
SFPQ	-4.73036
VAPA	-4.73036
ITGA5	-4.71864
CCT5	-4.69112
ACAP2	-4.66278
HSP90AA1	-4.66266
VANGL1	-4.65335
RPS12	-4.64492
TBC1D10A	-4.64386
EPS15	-4.64386
ANK3	-4.62469
STX7	-4.6177
RAN	-4.60604
ATP5C1	-4.60496
SNX1	-4.60338
TUBA1A	-4.58857
PTPLAD1	-4.58316
TPR	-4.57362
YARS	-4.57013
AP2A2	-4.56499
CPD	-4.56499
DDX1	-4.55771
WARS	-4.54555
SQSTM1	-4.54411
PDIA6	-4.51655
UTRN	-4.50271
TUBB4A	-4.49546
PACSIN2	-4.48091
AGFG1	-4.48091
XRCC5	-4.47951
ESYT1	-4.46375
WDR44	-4.45943
FASN	-4.4576
RPL23	-4.42626
PSMD1	-4.41515
FCHO2	-4.41481
IPO7	-4.41283
SFXN1	-4.40406
RPL4	-4.39593
RPS24	-4.39593
HSPA6	-4.36947
EXOC5	-4.36947
WIPI2	-4.34346
PRDX2	-4.32572
VCPIP1	-4.32193
IGF2R	-4.29793
PLS1	-4.29793
TRIM13	-4.28901
KLC1	-4.27277
PPFIBP1	-4.27277
STX16	-4.27277
PREB	-4.27059
RBM39	-4.27059
SLC9A3R1	-4.27059
UQCRFS1	-4.27059
SRP54	-4.25135
SLC25A3	-4.24988
LMTK2	-4.24793
RPL6	-4.23651
RPN1	-4.23651
RALGAPB	-4.22265
2022-09-09	-4.22265
TUBA4A	-4.22265
PGRMC2	-4.21696
STOML2	-4.21435
RPL17	-4.21326
ZFYVE16	-4.19613
WDR48	-4.19613
STAM	-4.19613
PALM	-4.19613
RARS	-4.17354
PSMC4	-4.16993
NOTCH2	-4.16993
VCL	-4.16993
TMEM87A	-4.15356
FLNA	-4.14912
ARHGAP1	-4.14659
INPP5F	-4.14323
DDX39B	-4.13775
PDCD6IP	-4.12556
PPA1	-4.11813
STX10	-4.1152
SPTBN1	-4.1152
ITGAV	-4.1152
PLEKHA1	-4.1152
RANGAP1	-4.11214
RPL7	-4.10162
ITGA6	-4.08746
AKAP12	-4.08746
BAIAP2	-4.08746
SLC30A1	-4.08746
SRC	-4.08746
PSMD2	-4.07723
VDAC3	-4.06507
CTNND1	-4.06471
EIF4B	-4.05918
DVL3	-4.05918
ESYT2	-4.05875
CCT3	-4.05586
USP14	-4.0504
CTPS	-4.02975
PHACTR4	-4.02945
C15orf38-AP3S2	-4.02945
CAND1	-4.02379
PHB2	-4.02237
RUVBL2	-4.02
SLC6A8	-4
CDCA3	-4
STX3	-4
PABPC1	-3.98089
SF3B1	-3.98089
FLNB	-3.97404
PANX1	-3.96993
SDCBP	-3.96993
RAB11FIP2	-3.96993
TIMM50	-3.95804
SURF4	-3.94621
SLC35F2	-3.94216
SF3B3	-3.93876
PSMC5	-3.93631
SCML2	-3.93411
LARS	-3.92754
KPNA2	-3.92249
RPS17	-3.9105
SRP72	-3.9105
SEC24B	-3.90689
2022-09-07	-3.90689
RABGAP1	-3.90689
PLEKHA5	-3.90689
CCT4	-3.89904
CCT2	-3.89873
ALDH3A2	-3.89093
SAR1A	-3.8865
DDX39A	-3.87911
CCDC132	-3.8748
LSR	-3.8748
PPP2R2A	-3.87431
RPS8	-3.87431
HIST1H2BB	-3.86905
GNB2L1	-3.86713
FAM91A1	-3.8611
PRKAR2A	-3.8563
MYH9	-3.84511
ANO6	-3.84097
NF2	-3.84097
DIAPH3	-3.84097
PRAF2	-3.8365
SEC11A	-3.8365
SH3GL1	-3.8365
TUBB6	-3.8365
VAT1	-3.8365
PHGDH	-3.82916
PTPN1	-3.82406
TMEM85	-3.81122
SPAG9	-3.80735
ALDH1A2	-3.80735
PHB	-3.79883
U2AF2	-3.78471
EXOC3	-3.77955
MB21D2	-3.77294
NUMB	-3.77294
RAB23	-3.77294
PRPF19	-3.77241
SAE1	-3.76286
TOR1AIP1	-3.76286
SRP68	-3.76093
XRN1	-3.7585
SLC25A11	-3.7398
CYFIP2	-3.7366
ANKS1A	-3.7366
EFNB2	-3.7366
PDLIM5	-3.7366
HSD17B12	-3.73387
CYB5R3	-3.71864
PSMC2	-3.71864
KIRREL	-3.70044
PPP1R10	-3.70044
SIN3B	-3.70044
RPS15A	-3.68656
PARP1	-3.68201
SLC25A10	-3.67604
RPS9	-3.67544
STT3A	-3.67496
CSE1L	-3.67317
RAB11FIP1	-3.67243
EEF2	-3.67046
FAM129B	-3.66334
SPRY4	-3.66334
NAPA	-3.66334
TUBB2B	-3.64776
NCKAP1	-3.62962
UNC45A	-3.62962
SLC39A10	-3.6241
PPP2R5C	-3.6241
SNX27	-3.6241
GOPC	-3.6241
CNNM4	-3.6241
FRS2	-3.6241
DSC2	-3.6241
TUBA1C	-3.61803
ABCD3	-3.61471
RPL7A	-3.60569
LSG1	-3.60466
PRDX6	-3.60393
GGA3	-3.58496
EPB41L5	-3.58496
ATP2B4	-3.58496
RPLP0	-3.56992
RPLP2	-3.56499
IPO5	-3.56204
UBA1	-3.55851
DYNC1H1	-3.55806
C1QBP	-3.55048
STAG2	-3.54473
CFL2	-3.54473
UBA2	-3.54411
SNAP29	-3.53456
CDIPT	-3.53292
PRDX3	-3.53292
EZR	-3.53065
PSMD12	-3.52356
ACACB	-3.50338
EHBP1	-3.50208
CASK	-3.50208
RPL21	-3.4828
TACC1	-3.4828
SNX2	-3.48091
PRDX1	-3.48011
SCYL2	-3.48011
HNRNPF	-3.47021
TUBA1B	-3.46337
CANT1	-3.45943
VAMP7	-3.45943
MPP1	-3.45943
YWHAE	-3.45629
VAMP2	-3.43008
SF3A1	-3.42954
RELL1	-3.41549
STK38	-3.41549
RAB3IP	-3.41549
GAB1	-3.41549
DDX3X	-3.40599
SAR1B	-3.40338
SRPRB	-3.40338
NUDT5	-3.39593
RPL12	-3.39593
SLC25A6	-3.39593
TUBG1	-3.39593
YARS2	-3.39593
YWHAQ	-3.39593
GART	-3.38009
RPS4X	-3.37341
RPS15	-3.37215
C14orf133	-3.36877
C19orf26	-3.36877
CD276	-3.36877
APPL1	-3.36877
AP1G1	-3.36877
ROR2	-3.36877
MARK3	-3.36877
ABCB1	-3.36877
SNRPD1	-3.36152
U2AF1	-3.36152
VRK1	-3.36152
PCBP2	-3.35379
DSG2	-3.3505
RTN4	-3.32193
SMC1A	-3.32193
ZCCHC8	-3.32193
GPRC5C	-3.32193
RALGAPA1	-3.32193
SWAP70	-3.32193
SLC12A7	-3.32193
SLC12A4	-3.32193
SLC12A6	-3.32193
APBB1	-3.32193
NCK1	-3.32193
KDELR1	-3.32193
GGA2	-3.32193
PSMD6	-3.31933
RAB7A	-3.30887
SLC25A4	-3.29793
RCC2	-3.28901
SNX6	-3.28901
CD2AP	-3.27632
ABCC1	-3.27352
LZIC	-3.27352
SLC7A1	-3.27352
PSMD14	-3.27277
PSMD4	-3.27277
TOP2A	-3.27277
HSD17B10	-3.26933
SERBP1	-3.26015
NPM1	-3.25765
RAB11B	-3.24793
TECR	-3.24793
ACOT9	-3.2393
SLC6A15	-3.2391
ARL6IP5	-3.23153
SMC3	-3.23009
POR	-3.22702
ABCE1	-3.22265
STT3B	-3.22265
USP7	-3.22265
LRRC4B	-3.22188
RP2	-3.22188
EFR3B	-3.22188
GOLGA5	-3.22188
STBD1	-3.22188
SMAP2	-3.22188
UNC5B	-3.22188
SCFD1	-3.21267
TMED10	-3.21267
MCCC1	-3.2109
HNRNPD	-3.19844
UBAP2L	-3.19844
SLC25A1	-3.19613
NONO	-3.19305
PPP2CA	-3.17354
TPD52	-3.17354
ARFIP1	-3.17137
PPP2R5D	-3.17137
PEAK1	-3.16993
LRRC8A	-3.16993
ADD2	-3.16993
MICALL1	-3.16993
FNBP1	-3.16993
ZDHHC5	-3.16993
AP1M1	-3.16993
DVL2	-3.16993
UBE2N	-3.16704
ENO1	-3.16474
SERPINH1	-3.15218
PICALM	-3.14569
PNN	-3.13495
TMEM93	-3.13495
RAB3B	-3.13331
TNPO1	-3.13331
KIAA1468	-3.11603
MPP7	-3.11603
ATP6V0A1	-3.11603
PRKAB1	-3.11603
GPATCH1	-3.11603
MTMR1	-3.11603
MTMR6	-3.11603
EPN1	-3.11603
KANK2	-3.11603
CSTF2	-3.11603
RPL10A	-3.10112
SEC61A1	-3.10112
PRKCI	-3.09065
AHSA1	-3.08874
SMPD4	-3.0776
MKL2	-3.06967
OAT	-3.05889
ITGA2	-3.05832
MARVELD2	-3.05832
CS	-3.05832
SMAD4	-3.05832
LRRC1	-3.05832
2022-09-11	-3.05832
UBQLN1	-3.05832
SLC9A1	-3.05832
TOX4	-3.05832
HNRNPU	-3.05124
NCLN	-3.04801
SLC1A3	-3.04801
TPD52L2	-3.04801
NPEPPS	-3.04719
PPIA	-3.03309
PURA	-3.03309
RPSA	-3.03309
SEC23B	-3.02945
SNRPA1	-3.02945
C19orf63	-3.0276
HSPA4	-3.02079
MTHFD1	-3.00883
TEX10	-3.00406
XPO5	-3.00406
C22orf28	-3.00232
CYFIP1	-3.00125
EXOC4	-3.00085
CEP170	-3
HSPA12A	-3
GIGYF2	-3
SET	-3
MTMR9	-3
HBS1L	-3
ATP9A	-3
STEAP2	-3
TRAPPC6B	-3
SEC23A	-2.99676
RPS16	-2.98311
SNAP23	-2.98003
SKIV2L2	-2.9758
DNAJB1	-2.97548
OSBPL8	-2.9731
STIP1	-2.96569
SEC24A	-2.95734
WDR41	-2.95734
ZMPSTE24	-2.95734
UFD1L	-2.94959
PTRF	-2.93923
TTC7B	-2.93923
TBC1D14	-2.93923
GOSR1	-2.93923
SSR4	-2.93829
VMA21	-2.93829
RPL10	-2.9235
WASF2	-2.9235
ANXA2	-2.91775
MTDH	-2.91447
DDX21	-2.91342
TRIP13	-2.9105
VEZT	-2.9105
XRN2	-2.9105
RPL13	-2.90689
RSL1D1	-2.90689
VAMP3	-2.90689
STXBP3	-2.90509
PDLIM1	-2.89487
RAB21	-2.8748
FLOT2	-2.8746
SEC22B	-2.87447
VPS33B	-2.87381
DLG3	-2.87381
KLC2	-2.87381
CDC42EP1	-2.87381
KIDINS220	-2.87381
XAB2	-2.87381
PIP5K1A	-2.87381
TFCP2	-2.87381
MARK2	-2.87381
PIK3R1	-2.87381
DERL1	-2.87381
RAB3IL1	-2.87381
SPTAN1	-2.86137
RPL24	-2.84511
DOLPP1	-2.83109
TPGS1	-2.83109
SYNCRIP	-2.82466
EEF1A1	-2.82036
ATP6AP1	-2.80859
RPS3A	-2.80735
RPRD1B	-2.80735
TBCE	-2.80735
USP46	-2.80735
SYNJ1	-2.80735
EPB41L1	-2.80735
HAUS6	-2.80735
PDZD11	-2.80735
SCYL3	-2.80735
BASP1	-2.80735
SLC38A3	-2.80735
TOMM20	-2.80735
CDK5RAP3	-2.80581
NUMA1	-2.80488
RANBP1	-2.80488
SUGT1	-2.79025
RPS10	-2.787
LMNB1	-2.78416
RAB6A	-2.76223
RRM2	-2.76223
YWHAZ	-2.7585
OCLN	-2.75579
NUP133	-2.7496
PFDN5	-2.7496
CACHD1	-2.73769
HDDC2	-2.73769
SLC29A1	-2.73769
ERO1LB	-2.73769
MAVS	-2.73769
ATP6V0A2	-2.73769
HAUS8	-2.73769
PODXL2	-2.73769
C3orf75	-2.73769
FAM114A2	-2.73769
EFTUD1	-2.73769
RAB27A	-2.73769
OSBPL11	-2.73769
PPP1R12A	-2.73769
PGPEP1	-2.73769
CKAP5	-2.73697
CACYBP	-2.7366
TMEM33	-2.7366
TUBB2A	-2.71958
STAT3	-2.71796
CLTC	-2.71272
OXSR1	-2.70461
RAB5C	-2.70044
EIF3A	-2.69287
NOS1AP	-2.68834
SYAP1	-2.68781
STK39	-2.67564
PRKDC	-2.66985
ILF3	-2.66334
RG9MTD1	-2.66334
STMN1	-2.66334
GLO1	-2.66221
VPS35	-2.66221
SBF1	-2.66221
SUN2	-2.66221
SLC23A2	-2.66221
STXBP1	-2.66221
PPIH	-2.66221
RICTOR	-2.66221
BNIP2	-2.66221
MICAL3	-2.66221
TULP3	-2.66221
TNIK	-2.66221
ANKRD28	-2.66221
RHOC	-2.66221
GOLT1B	-2.66221
PPP2R5E	-2.66221
EFR3A	-2.66221
COPS3	-2.66221
MKI67	-2.6568
RPS27A	-2.65329
RFC5	-2.64689
SLC25A19	-2.64689
UBE2J1	-2.64689
CCDC47	-2.64666
STX12	-2.63947
STUB1	-2.62892
RPAP3	-2.62064
PYGL	-2.61576
SLC9A3R2	-2.60466
RBBP7	-2.58857
RPS23	-2.58857
SEC16A	-2.58857
ATP5O	-2.58496
CHD4	-2.58496
DENND4C	-2.58496
TJP1	-2.58496
NDRG3	-2.58496
SLC25A24	-2.58496
ZNF622	-2.58496
TBC1D8	-2.58496
MTR	-2.58496
PRUNE	-2.58496
EHD1	-2.58496
SNX4	-2.58496
2022-09-06	-2.58496
SLC7A2	-2.58496
APBB2	-2.58496
PRKRA	-2.58496
TBC1D22B	-2.58496
HSD17B4	-2.58393
RPL38	-2.58316
PRDX5	-2.58208
SMARCA5	-2.58208
PDCD6	-2.5624
RPS14	-2.5624
ATP2A2	-2.55948
PAICS	-2.55827
RPL15	-2.55309
CORO1B	-2.54604
ALYREF	-2.54473
PDHB	-2.54473
SLK	-2.53725
NAT10	-2.53024
PSMD7	-2.5278
RPL26	-2.5278
SPC24	-2.5278
TIMM23	-2.5278
TIMM44	-2.5278
UBR4	-2.5278
STRAP	-2.51627
DHRS7	-2.51024
AP2B1	-2.50534
EIF2AK3	-2.50335
TRIM9	-2.50335
DPYSL4	-2.50335
UBE2O	-2.50335
ATP1B1	-2.50335
GTF2A1	-2.50335
RABGAP1L	-2.50335
SH3GLB2	-2.50335
CD44	-2.50335
KIF5C	-2.50335
LRP8	-2.50335
F11R	-2.50335
PRKAR2B	-2.50335
KIAA1033	-2.50335
ZYX	-2.50335
HSBP1	-2.50335
TSPYL1	-2.50335
HAUS2	-2.50335
SLC1A4	-2.50335
MSL3	-2.50335
PARK7	-2.5025
RPP30	-2.50208
SNRPN	-2.50208
SRP14	-2.50208
SEMA4C	-2.4903
SF1	-2.49005
TMX1	-2.48203
SPCS2	-2.48011
COX4NB	-2.4769
DDRGK1	-2.4706
RPL3	-2.4706
C15orf24	-2.46806
SCAMP2	-2.46239
SGPL1	-2.46239
TMEM43	-2.46239
TSFM	-2.46239
WDR3	-2.46239
BTN3A3	-2.46061
TNPO3	-2.45943
DRG1	-2.45796
PSME3	-2.45796
MTHFD1L	-2.43008
ATP5J2-PTCD1	-2.42413
EPB41	-2.42203
NHLRC2	-2.41549
RPL13A	-2.41504
ATG2B	-2.41414
INPP1	-2.41414
TBC1D2B	-2.41414
EXOSC2	-2.41414
TMEM51	-2.41414
SPAG1	-2.41414
LRRC49	-2.41414
ORC2	-2.41414
LYSMD3	-2.41414
MSN	-2.41414
AHCYL1	-2.41414
MAPK1	-2.41414
LEMD2	-2.41414
HN1	-2.41414
HSPA2	-2.41414
YWHAH	-2.41414
FCGRT	-2.41414
CHMP6	-2.41414
SKA1	-2.41414
NCS1	-2.41414
NAP1L1	-2.40112
RRS1	-2.39593
RTCD1	-2.39593
SARNP	-2.39593
SRRT	-2.39593
VPS33A	-2.39593
LBR	-2.39025
HNRNPA1	-2.38835
DDX5	-2.38659
RPA1	-2.37618
RPL27	-2.37618
SF3B2	-2.37618
TMEM97	-2.37618
TTC1	-2.37618
ECH1	-2.37612
RPS27	-2.36877
SNX3	-2.36877
TP53	-2.36877
STX5	-2.36463
NOLC1	-2.36008
C11orf2	-2.35828
CKAP4	-2.34767
SF3B14	-2.32626
SLC30A6	-2.32626
SNRPD3	-2.32626
TUBGCP3	-2.32626
YTHDF2	-2.32626
PYGB	-2.3244
CXADR	-2.32301
CAST	-2.32193
CDC20	-2.32193
VPS37B	-2.32193
VAMP8	-2.32193
SMCR8	-2.32193
TAF7	-2.32193
CEP55	-2.32193
CLMN	-2.32193
KEAP1	-2.32193
SNAP47	-2.32193
TES	-2.32193
KIAA1549	-2.32193
USO1	-2.32193
SLC25A20	-2.32193
HINT1	-2.32193
CPVL	-2.32193
TOMM7	-2.32193
GNA13	-2.32193
VPS53	-2.32193
YWHAG	-2.32193
NUMBL	-2.32193
GPRC5A	-2.32193
PRRC1	-2.32193
TROVE2	-2.32193
CCM2	-2.32193
DTNA	-2.32193
RPL36	-2.31847
RPS26	-2.31847
HNRNPM	-2.31325
HNRNPH1	-2.312
CFL1	-2.31131
PFKP	-2.3045
COPG1	-2.29793
EPHA2	-2.29774
CAMLG	-2.29393
RPL23A	-2.28983
RPS18	-2.2836
SMC2	-2.28175
SSR1	-2.28175
GNL3	-2.27929
HIST1H2BD	-2.27424
RAB18	-2.27352
CCT8	-2.26187
RANBP3	-2.26015
RFC2	-2.26015
RPS25	-2.26015
STAT1	-2.26015
SF3A3	-2.25078
STX8	-2.25078
SUPT5H	-2.25078
VMP1	-2.25078
XPO7	-2.25078
DPM1	-2.23942
RPL8	-2.2391
ST13	-2.2391
IGF2BP1	-2.22972
EPB41L2	-2.22952
CLDN1	-2.22342
SLC5A3	-2.22342
MTMR14	-2.22342
KTN1	-2.22342
STAM2	-2.22342
WDR20	-2.22342
GNL1	-2.22342
SNX17	-2.22342
CNNM3	-2.22342
RPA3	-2.22342
ZW10	-2.22342
TMEM160	-2.22342
ST7	-2.22342
SKA3	-2.22342
ALCAM	-2.22342
CCNB1	-2.22342
VPS4B	-2.22342
CEPT1	-2.22342
PLK1	-2.22342
USP32	-2.22342
PEX14	-2.22342
SYS1	-2.22342
PLSCR3	-2.22342
THBD	-2.22342
IGBP1	-2.22342
PTPN9	-2.22342
SFT2D1	-2.22342
PSME1	-2.22188
RPL19	-2.22188
SLC16A1	-2.22188
TCOF1	-2.22188
PSMD11	-2.21168
ABCF1	-2.20726
RPS6	-2.20726
LEMD3	-2.20107
RPL27A	-2.19938
PLIN3	-2.19613
C8orf55	-2.19516
DNAJC9	-2.19516
DHX30	-2.1834
TMEM199	-2.17354
YWHAB	-2.17354
RHEB	-2.16993
STEAP3	-2.16812
RPL5	-2.15164
MRE11A	-2.15158
ARF1	-2.12805
RPL14	-2.11603
ATP7A	-2.11437
ADNP	-2.11437
ALG12	-2.11437
C1orf43	-2.11437
TOLLIP	-2.11437
NEK9	-2.11437
CHMP4B	-2.11437
DAG1	-2.11437
C16orf62	-2.11437
ARFIP2	-2.11437
COPS4	-2.11437
TFIP11	-2.11437
LMCD1	-2.11437
CLDND1	-2.11437
SREK1	-2.11437
BNIP1	-2.11437
AHCYL2	-2.11437
KLC4	-2.11437
CSNK1G3	-2.11437
PIP4K2C	-2.11437
EPHA3	-2.11437
MTFP1	-2.11437
A2M	-2.11437
SQRDL	-2.11437
CALM2	-2.11437
NXN	-2.11437
ARFGEF1	-2.11437
C2CD4C	-2.11437
DNAJC8	-2.11437
CKMT1B	-2.11437
TMEM147	-2.11437
ATL1	-2.11437
TK1	-2.11437
OLA1	-2.11437
PLCB1	-2.11437
FUNDC1	-2.11437
ANO10	-2.11437
ARVCF	-2.11437
PPAP2B	-2.11437
RAD23B	-2.11437
PLD1	-2.11437
MAP4K5	-2.11437
PTPRG	-2.11437
VPS25	-2.11437
NUP62	-2.10544
PFN1	-2.1016
PKN2	-2.1016
YBX1	-2.1016
NDUFA9	-2.09415
SLC27A2	-2.09415
H2AFY	-2.09288
DHX15	-2.09268
RAB13	-2.09192
RHOT1	-2.09192
SEC31A	-2.09192
TIMM13	-2.09192
TMEM109	-2.09192
HIST1H4J	-2.08168
IMPDH2	-2.07838
CMPK1	-2.07039
CIRBP	-2.06751
TEX264	-2.06751
DNM1L	-2.05889
EBP	-2.05832
THOC2	-2.05832
MAP4	-2.0453
ALG5	-2.04259
HNRPDL	-2.04259
TARDBP	-2.04259
CNIH4	-2.03742
GDI2	-2.03742
NSDHL	-2.03742
C11orf49	-2.0245
CTNNA1	-2.02361
DDOST	-2.01078
PRPS2	-2.00271
SMC4	-2.00271
TMCO1	-2.00271
TOR1AIP2	-2.00271
VARS	-2.00271
HSPB1	-2.00083
UQCR10	-2
TP53BP2	-2
CDC42EP4	-2
SPNS1	-2
ACBD6	-2
ARFGEF2	-2
MRPS27	-2
PCYOX1L	-2
SLC2A14	-2
KIAA0528	-2
DERL2	-2
PCYT1A	-2
JAM3	-2
EBAG9	-2
FIBP	-2
MPZL1	-2
SH3GL2	-2
FLVCR1	-2
PTPRJ	-2
SCIN	-2
ELMOD3	-2
LPP	-2
PRKACB	-2
NEBL	-2
IGSF3	-2
WDR6	-2
SAMM50	-2
ATP6V0D1	-2
GTF2F2	-2
C1orf198	-2
SNTB2	-2
MAPK9	-2
CAB39	-2
TRNT1	-2
HGS	-2
AP4S1	-2
JAG2	-2
MTX3	-2
C15orf63	-2
PTDSS1	-2
TNFRSF10B	-2
ATP6V1G2	-2
SLC1A1	-2
PDCD5	-1.99865
RAB5A	-1.99865
TAMM41	-1.99784
UBLCP1	-1.99784
PA2G4	-1.98165
NOP58	-1.97158
COX2	-1.96993
PSMD13	-1.96519
MCM6	-1.96492
SCAMP3	-1.96492
ILF2	-1.95608
RPL7L1	-1.95193
SHMT2	-1.95193
CECR5	-1.94959
PDXDC1	-1.94959
PDHA1	-1.93923
PRPF40A	-1.93923
RPL11	-1.93923
SRSF7	-1.93923
CSDE1	-1.93829
HSPA9	-1.93171
SLC25A12	-1.926
RCN1	-1.92236
SACM1L	-1.92236
SEC63	-1.92236
CAPZA2	-1.91981
FUS	-1.91981
CLCC1	-1.91711
RPL18	-1.91711
UBE2D3	-1.9105
UBE4A	-1.9105
WDR36	-1.9105
YTHDC2	-1.9105
PSME2	-1.89716
RAB2A	-1.89716
RFC4	-1.89716
ARF5	-1.8957
PTPN11	-1.8957
EPB41L3	-1.89388
DNAJA1	-1.88379
HIST1H1C	-1.88379
LNPEP	-1.87982
LRP6	-1.87578
PNP	-1.87578
PALM2-AKAP2	-1.87578
TMTC3	-1.87578
SNCA	-1.87578
LRRC16A	-1.87578
AKAP1	-1.87578
GNS	-1.87578
SLC25A15	-1.87578
RRAGC	-1.87578
EPN2	-1.87578
DLST	-1.87578
ITGA7	-1.87578
DIP2A	-1.87578
ITGB5	-1.87578
STOM	-1.87578
EIF4A2	-1.87578
ITSN2	-1.87578
TSPAN3	-1.87578
PDLIM3	-1.87578
SMG9	-1.87578
ANLN	-1.87578
ITSN1	-1.87578
TMEM9	-1.87578
MUT	-1.87578
INSR	-1.87578
SYPL2	-1.87578
CDH2	-1.87578
SPG21	-1.87578
MRPS9	-1.87578
NOSIP	-1.87578
BUB1B	-1.87578
BID	-1.87578
SFXN3	-1.87578
ECSIT	-1.87578
WDR82	-1.87578
TOM1L2	-1.87578
PCID2	-1.87447
PRKAA1	-1.87447
RPS19	-1.87381
SAP30BP	-1.87381
SSB	-1.87381
SSRP1	-1.87381
TMEM209	-1.87381
SLC30A5	-1.84944
GCN1L1	-1.84672
TARS	-1.84511
VTA1	-1.84511
SEC61G	-1.83799
UFL1	-1.83053
ASS1	-1.8273
ACSL3	-1.82466
RNPS1	-1.812
SLC38A1	-1.812
SMU1	-1.812
TIAL1	-1.812
TRAM1	-1.812
TRMT1L	-1.812
ACTN4	-1.80504
CC2D1A	-1.80504
RPL31	-1.80504
SLC2A1	-1.80504
CNP	-1.78756
DEPDC1B	-1.78523
CRKL	-1.78477
PSMC1	-1.7845
CUL4A	-1.78381
SDHA	-1.78381
SLC33A1	-1.77967
U2SURP	-1.77967
NAP1L4	-1.77658
MSH2	-1.77294
UBFD1	-1.7635
RPS13	-1.75763
PRKAG1	-1.75579
RANBP6	-1.75309
RPS20	-1.75309
TRIM25	-1.75309
DARS	-1.75261
MCM5	-1.74458
P4HB	-1.73769
RER1	-1.73769
TCERG1	-1.73769
PSPC1	-1.73725
BAG3	-1.73697
CALD1	-1.73552
BRAP	-1.73552
PRMT5	-1.73552
ARFGAP3	-1.73552
TH1L	-1.73552
DR1	-1.73552
GTF2E2	-1.73552
AFTPH	-1.73552
FAM83B	-1.73552
ZFYVE20	-1.73552
USP15	-1.73552
2022-09-08	-1.73552
RAB35	-1.73552
IL1RAP	-1.73552
NVL	-1.73552
KPNA4	-1.73552
CAMK1D	-1.73552
DBNL	-1.73552
C17orf81	-1.73552
UFSP2	-1.73552
G3BP2	-1.73552
AKAP5	-1.73552
COG1	-1.73552
WDFY1	-1.73552
CD47	-1.73552
DFNA5	-1.73552
MPV17	-1.73552
MLLT11	-1.73552
NAA38	-1.73552
POLRMT	-1.73552
CSNK1D	-1.73552
SLC25A40	-1.73552
MYO1E	-1.73552
MAPKAP1	-1.73552
UBE2D1	-1.73552
C1orf21	-1.73552
ALG3	-1.73552
CYCS	-1.73552
PRKAA2	-1.73552
PCDH7	-1.73552
C8orf86	-1.73552
FAM105A	-1.73552
SRP19	-1.73552
DCTN5	-1.73552
KLHL36	-1.73552
ARFRP1	-1.73552
AURKA	-1.73552
ERC1	-1.73552
RAC1	-1.73552
MTX2	-1.73552
UBE2G2	-1.73552
ANXA5	-1.73552
CAD	-1.73193
MCM4	-1.72355
PUS1	-1.7189
SSBP1	-1.7189
TELO2	-1.70294
TMOD3	-1.70294
TUBGCP2	-1.70294
IARS2	-1.68855
PIGU	-1.67429
SCP2	-1.67429
PHF3	-1.66895
AP1B1	-1.66524
NDUFS3	-1.66334
PRPSAP2	-1.66221
SCPEP1	-1.66221
SNW1	-1.66221
HSP90B1	-1.65972
DARS2	-1.65857
FARSA	-1.65348
PRPF4	-1.65348
SLC7A5	-1.65348
CISD2	-1.65137
ADCY9	-1.64574
CNN2	-1.64148
RAB10	-1.64148
RAP1A	-1.64148
AGPAT9	-1.63691
OPA1	-1.63691
S100A11	-1.63691
STX18	-1.6263
PCBP1	-1.62469
COPB2	-1.62224
OCIAD1	-1.61532
CDK1	-1.59718
PRDX4	-1.58857
SARS2	-1.58857
SMN2	-1.58857
SNRPD2	-1.58857
TM9SF3	-1.58857
TTK	-1.58857
WIBG	-1.58857
ZC3H15	-1.58857
NUBP2	-1.58641
ATP6V1F	-1.58586
EIF2S3	-1.58572
ATP5L	-1.58496
KIF2A	-1.58496
VTI1A	-1.58496
ZC3H11A	-1.58496
BCS1L	-1.58496
PI4K2A	-1.58496
SIRT2	-1.58496
WDR83	-1.58496
GOSR2	-1.58496
PAIP1	-1.58496
RPRD1A	-1.58496
STON2	-1.58496
DAGLA	-1.58496
BRK1	-1.58496
STIM2	-1.58496
NUPL1	-1.58496
HSPA4L	-1.58496
SMEK1	-1.58496
ANKRD17	-1.58496
RCN2	-1.58496
EEPD1	-1.58496
PTK7	-1.58496
HLA-B	-1.58496
EPHB4	-1.58496
NBEA	-1.58496
SBDS	-1.58496
LASP1	-1.58496
PSD3	-1.58496
TOM1	-1.58496
TTF2	-1.58496
CNOT10	-1.58496
BCAS3	-1.58496
PSMA5	-1.58496
TPT1	-1.58496
GNA11	-1.58496
C19orf6	-1.58496
FAM129A	-1.58496
KIAA1609	-1.58496
NANP	-1.58496
PPFIA1	-1.58496
SFT2D2	-1.58496
PARD6B	-1.58496
CLIC1	-1.58496
KIAA0040	-1.58496
SLC6A9	-1.58496
SLC30A4	-1.58496
COG7	-1.58496
SLC6A6	-1.58496
ERH	-1.58496
OTUD7B	-1.58496
TC2N	-1.58496
EFNB3	-1.58496
ABCC5	-1.58496
TXNDC9	-1.58496
OPTN	-1.58496
LAMTOR3	-1.58496
WDR7	-1.58496
MRPS28	-1.58496
EIF4E2	-1.58496
IRGQ	-1.58496
ITGA1	-1.58496
PPP1R9A	-1.58496
RAP2A	-1.58496
SNAP91	-1.58496
DOCK7	-1.58496
PIP4K2A	-1.58496
UBE2S	-1.58496
DIAPH2	-1.58496
RRAGA	-1.58496
OSBPL2	-1.58496
AARS	-1.58496
BRP44	-1.58496
RAB27B	-1.58496
SEC24C	-1.58316
AKT2	-1.58208
HAT1	-1.58208
SRPK1	-1.58208
MATR3	-1.55551
ACTR1A	-1.54898
HMOX2	-1.54168
CCT6A	-1.5321
PRKACA	-1.53107
LRRC59	-1.53024
SUB1	-1.52239
PPME1	-1.51736
DDX54	-1.50973
SULT1A1	-1.4984
DDX17	-1.49812
SKP1	-1.49299
IGF2BP2	-1.49276
NXF1	-1.48635
CAPRIN1	-1.48357
FKBP5	-1.48357
PIGS	-1.48357
RPL32	-1.48357
TBL3	-1.48357
THRAP3	-1.48357
VKORC1L1	-1.48357
DNAJA2	-1.48091
DBT	-1.47559
SSR3	-1.47335
CUL4B	-1.4706
TSNAX	-1.46435
UBE2M	-1.46435
RABL3	-1.45943
PDIA3	-1.45697
PRPS1	-1.45697
RAB9A	-1.45697
SRP9	-1.45697
KPNB1	-1.45519
BTF3	-1.45403
LARP1	-1.44449
SDHB	-1.44188
DNM2	-1.43494
RPLP1	-1.4344
MAGT1	-1.43037
LLGL1	-1.43024
C1orf226	-1.42559
CDC23	-1.41684
ATG4C	-1.41684
ADPGK	-1.41684
PIK3C3	-1.41684
ILDR2	-1.41684
CPT2	-1.41684
PGAM1	-1.41684
PGK1	-1.41684
ILK	-1.41684
JUN	-1.41684
LMBRD2	-1.41684
MTCH1	-1.41684
COMMD8	-1.41684
EXOSC4	-1.41684
PCNP	-1.41684
EFHD1	-1.41684
GSTO1	-1.41684
RAP2B	-1.41684
CADM4	-1.41684
KIF18B	-1.41684
WASL	-1.41684
RABEP1	-1.41684
TBC1D12	-1.41684
SLC41A3	-1.41684
PGP	-1.41684
C5orf51	-1.41684
PPP1R7	-1.41684
GPATCH8	-1.41684
KDM3B	-1.41684
DIABLO	-1.41684
RASAL2	-1.41684
GGA1	-1.41684
CUL5	-1.41684
MACF1	-1.41684
BRE	-1.41684
PEA15	-1.41684
OCIAD2	-1.41684
HS1BP3	-1.41684
TMEM126A	-1.41684
TMEM55B	-1.41684
MET	-1.41684
EXOC2	-1.41684
RAPH1	-1.41684
SLC35B1	-1.41684
UACA	-1.41684
THSD1	-1.41684
EIF2B2	-1.41684
DHRS13	-1.41684
SMAP1	-1.41684
ALDH2	-1.41684
CAMK2G	-1.41684
CTDSP1	-1.41684
ABR	-1.41684
TACC3	-1.41684
CCDC104	-1.41684
TMEM41A	-1.41684
ITGA4	-1.41684
NOTCH1	-1.41684
SMARCAD1	-1.41684
BLOC1S1	-1.41684
DIP2B	-1.41684
CDC16	-1.41684
STXBP2	-1.41684
AHNAK2	-1.41684
NR2C1	-1.41684
MRPS26	-1.41684
PPP1R16B	-1.41684
ILKAP	-1.41684
ME1	-1.41684
SLC35G2	-1.41684
CHCHD1	-1.41684
COPS5	-1.41684
LGALS1	-1.41684
CSNK1G2	-1.41684
FLII	-1.41684
SAP18	-1.41684
ACTR3C	-1.41684
KIFC1	-1.41684
PRPF6	-1.41504
LMAN1	-1.41468
SNRPE	-1.41414
TXN	-1.41414
USP11	-1.41414
USP39	-1.41414
MDC1	-1.40354
PLS3	-1.39052
RBMX	-1.39052
RPL35	-1.39052
MCM7	-1.38561
IPO9	-1.38497
ARL13B	-1.37573
DAZAP1	-1.37452
HSDL1	-1.37452
LRWD1	-1.37452
CCDC43	-1.36877
PGD	-1.36877
GTPBP4	-1.36725
PRIM2	-1.36463
RPL30	-1.36463
EIF3F	-1.35881
GRWD1	-1.35426
HAX1	-1.35426
RALA	-1.35426
PGRMC1	-1.34506
RPS5	-1.34506
ATP6V1B2	-1.34142
CRK	-1.33314
EEF1G	-1.33082
EIF4G1	-1.3301
SNRPG	-1.3241
TMEM115	-1.3241
TMEM205	-1.3241
TMEM38B	-1.3241
TPX2	-1.3241
UBE2I	-1.3241
VBP1	-1.3241
XIAP	-1.3241
YIPF2	-1.3241
CLPP	-1.32279
DDX19B	-1.32279
ARHGEF2	-1.32193
PCYOX1	-1.32193
ETFA	-1.31466
CUL1	-1.30217
DNAJA3	-1.28983
FAM158A	-1.28983
C9orf64	-1.28302
NUP188	-1.28302
PTRH2	-1.28302
PUF60	-1.28302
RPL37A	-1.28302
TFAM	-1.28302
MMS19	-1.27865
DDX46	-1.26959
ATAD3A	-1.26361
PCMT1	-1.26303
LPCAT3	-1.26015
SRM	-1.26015
USP19	-1.26015
CYP51A1	-1.24537
DLAT	-1.24537
FXR2	-1.24537
CCDC115	-1.24025
DHX9	-1.23744
DNAJB11	-1.22342
GFPT1	-1.22342
RAD21	-1.22342
RPL28	-1.22342
SOAT1	-1.22342
UQCRB	-1.22342
GNL2	-1.22239
IFIT5	-1.22239
PRPSAP1	-1.22239
NASP	-1.2221
ACBD5	-1.22033
SF3B5	-1.22033
HSD17B11	-1.22033
ALG10	-1.22033
TBC1D10B	-1.22033
EXOSC6	-1.22033
SLC30A7	-1.22033
TTC28	-1.22033
CCDC6	-1.22033
RQCD1	-1.22033
ACTR3	-1.22033
RINT1	-1.22033
DHX29	-1.22033
MZT2B	-1.22033
FAM50A	-1.22033
CBX8	-1.22033
WRB	-1.22033
AKAP11	-1.22033
PPIP5K2	-1.22033
PXN	-1.22033
NAF1	-1.22033
SART3	-1.22033
KALRN	-1.22033
SYTL4	-1.22033
PDS5B	-1.22033
SLC20A1	-1.22033
MTMR12	-1.22033
TAF1	-1.22033
OTUB1	-1.22033
FAM46D	-1.22033
RIC8A	-1.22033
SLC19A1	-1.22033
C22orf32	-1.22033
STK11	-1.22033
SNAPIN	-1.22033
SLC7A11	-1.22033
EIF2B5	-1.22033
LAMTOR1	-1.22033
NCAM1	-1.22033
UBXN2B	-1.22033
MAP1LC3B	-1.22033
2022-09-03	-1.22033
NCAPD2	-1.22033
BSDC1	-1.22033
TPRKB	-1.22033
ZC3H4	-1.22033
TYMS	-1.22033
MDH2	-1.22033
DLGAP5	-1.22033
SLC26A6	-1.22033
EXOSC5	-1.22033
PLDN	-1.22033
GXYLT1	-1.22033
MYADM	-1.22033
AMIGO2	-1.22033
PPAPDC2	-1.22033
DOLK	-1.22033
GBA	-1.22033
PIN4	-1.22033
RNASEH2C	-1.22033
ANAPC1	-1.22033
CALR	-1.22033
NKIRAS2	-1.22033
TMEM57	-1.22033
SLC35E1	-1.22033
LSM5	-1.22033
TMEM201	-1.22033
AP4B1	-1.22033
PPP6R3	-1.22033
TBCB	-1.22033
COMMD9	-1.22033
NDUFA12	-1.22033
NRBF2	-1.22033
CPNE3	-1.22033
DNM3	-1.22033
EIF1	-1.22033
CBX1	-1.22033
TIAM1	-1.22033
ROS1	-1.22033
BET1L	-1.22033
NDUFAF4	-1.22033
SLC25A17	-1.22033
GNAQ	-1.22033
MUC19	-1.22033
NEDD1	-1.22033
ATP5J	-1.22033
PHF21B	-1.22033
SNX30	-1.22033
TMEM214	-1.22033
C12orf57	-1.22033
MTOR	-1.22033
CD99	-1.22033
C17orf61	-1.22033
ZMYM3	-1.22033
TMEM14C	-1.22033
TFDP1	-1.22033
MAPKAPK2	-1.22033
CTTN	-1.21575
ELOVL5	-1.20756
KHDRBS1	-1.20163
SCARB2	-1.19381
ARF4	-1.19207
HLCS	-1.18677
EIF2B3	-1.18254
RAB5B	-1.18254
SARS	-1.18254
PSMA2	-1.17354
PTPMT1	-1.17354
REEP5	-1.17354
SUPT16H	-1.17354
THUMPD3	-1.17354
TMEM165	-1.17354
ADD3	-1.17229
EMD	-1.16708
EIF5A	-1.16433
HCFC1	-1.16258
RHOA	-1.16
LRPPRC	-1.15898
ATP6V1A	-1.14515
RAB3GAP2	-1.13829
RPS11	-1.1375
PPP1CB	-1.13593
SLC27A4	-1.13593
SRSF1	-1.13593
TWF1	-1.13593
UQCRQ	-1.13593
C20orf3	-1.13093
MYEF2	-1.12422
MAPRE1	-1.12366
PCNA	-1.12075
GAPVD1	-1.11603
RANBP2	-1.1157
POGZ	-1.11437
POLD3	-1.11437
PYCR2	-1.11437
RPS28	-1.11437
SCARB1	-1.11437
TMED2	-1.11437
TMED5	-1.11437
GALK1	-1.10751
OCRL	-1.10328
RARS2	-1.1016
SAMHD1	-1.1016
CDK2	-1.09851
LRRC40	-1.09356
NUDC	-1.08981
EPS15L1	-1.08829
ORC5	-1.08651
RAB7L1	-1.08651
ADAR	-1.07838
ECD	-1.07838
TBC1D15	-1.07838
RAB14	-1.078
EIF4G2	-1.07202
ANKLE2	-1.07183
SH3GLB1	-1.07183
ELP4	-1.06967
RAD50	-1.06744
PI4KA	-1.06345
AK1	-1.05832
NAMPT	-1.05404
EIF2S1	-1.02605
LMNA	-1.0169
TRA2B	-1.00541
TTN	-1.00541
UBTF	-1.00541
VPS52	-1.00541
WBP11	-1.00541
WDR5	-1.00541
ZNF326	-1.00541
ZNF74	-1.00541
PDK3	-1.00309
ACAD9	-1.00216
BRI3BP	-1
H1FX	-1
HLA-A	-1
LONP1	-1
NDUFA10	-1
PSMD8	-1
RAB1B	-1
SPAG7	-1
WDR61	-1
AKTIP	-1
PHF10	-1
ATG3	-1
EED	-1
FNBP1L	-1
PGM2L1	-1
DGKE	-1
NAPG	-1
PCDH9	-1
RABGEF1	-1
NEDD4L	-1
NAT1	-1
TUBB3	-1
CDK16	-1
ORC3	-1
FMNL2	-1
CCDC50	-1
RCOR1	-1
DHX8	-1
GBA2	-1
DNAH7	-1
TMEM65	-1
MLH1	-1
KIAA0196	-1
TBCEL	-1
ERAP2	-1
TNFAIP8	-1
NOC4L	-1
THTPA	-1
ITM2C	-1
HDGFRP2	-1
CUEDC2	-1
EPCAM	-1
RASSF8	-1
GOLGA7	-1
PSMB1	-1
WASF1	-1
HAUS3	-1
STRN4	-1
AGFG2	-1
NDEL1	-1
LAS1L	-1
PIK3R4	-1
FAM125A	-1
EYA3	-1
PARVA	-1
FRG1	-1
YIF1B	-1
CDKN2A	-1
RHBDD2	-1
ESPL1	-1
REPS1	-1
ARHGAP21	-1
UBAC2	-1
SLC26A2	-1
UBXN8	-1
NRM	-1
ABCC4	-1
PAG1	-1
SGTA	-1
LIN7C	-1
DCUN1D5	-1
EIF2C2	-1
MRPS35	-1
CISD1	-1
YEATS2	-1
MOB2	-1
PLLP	-1
LRRC8C	-1
PEX11B	-1
2022-03-01	-1
MON2	-1
NAT14	-1
YIPF3	-1
MLF2	-1
SYNGR3	-1
BCL2L13	-1
DDI2	-1
SFXN4	-1
AHCTF1	-1
PATL1	-1
UPF3B	-1
NMNAT1	-1
GRB2	-1
CPSF3L	-1
C11orf58	-1
CLASP1	-1
CTCF	-1
PXDC1	-1
APOL2	-1
IFRD1	-1
CHML	-1
OXR1	-1
COG2	-1
EDF1	-1
RSU1	-1
PRIM1	-1
GRIPAP1	-1
LYPLA2	-1
FAM54B	-1
EPN3	-1
PRC1	-1
SH3KBP1	-1
TMEM173	-1
DNAJC16	-1
DNTTIP2	-1
PEX5	-1
ITM2B	-1
RALYL	-1
SYNJ2BP	-1
PPIL4	-1
EXD2	-1
FMNL3	-1
CDKN2AIP	-1
LDLRAP1	-1
CYB5A	-1
TBC1D24	-1
PPP6C	-1
SHISA2	-1
NOL11	-1
CDC123	-1
SRI	-1
UBA6	-1
GFM1	-1
KIF4A	-1
MRPS5	-1
CLCN7	-1
DMXL1	-1
RFT1	-1
YIF1A	-1
CTDNEP1	-1
ALG6	-1
MRPS11	-1
EPHA7	-1
EPHB3	-1
TRAPPC3	-1
UTP3	-1
SYTL5	-1
FER	-1
LOC100653071	-1
ERGIC2	-1
WDR77	-1
TJP2	-1
RPS29	-1
S100A10	-1
UTP15	-1
WDR13	-1
SFTPD	-1
CDC5L	-0.998033
HDAC1	-0.998033
RAB8A	-0.997296
LRP1B	-0.995674
RPL34	-0.995674
SCAF4	-0.995674
SEC23IP	-0.995674
SNRPB2	-0.995674
GARS	-0.982031
CAPZA1	-0.974412
DNAJC11	-0.974258
PAK4	-0.971136
CNN3	-0.967153
C14orf166	-0.965059
CCT7	-0.949374
PELO	-0.946503
PGM3	-0.946503
DCTN1	-0.939227
EPRS	-0.929157
DRG2	-0.918386
HADHA	-0.911528
HIST1H2AA	-0.907251
LAMP1	-0.894037
SRR	-0.894037
BTF3L4	-0.892609
CHAMP1	-0.885633
HN1L	-0.885633
C16orf80	-0.87578
SPC25	-0.87578
TMX3	-0.87578
UBQLN2	-0.87578
USMG5	-0.87578
ATP1A1	-0.867237
DDX42	-0.85938
MYH10	-0.84944
DYNC1LI2	-0.845114
PPA2	-0.845114
RAB34	-0.845114
RPS6KA3	-0.845114
SRSF2	-0.845114
TBP	-0.845114
TOMM6	-0.845114
HNRNPK	-0.839987
RRM1	-0.829173
RRP12	-0.829173
SART1	-0.808904
SMARCD1	-0.808904
TKT	-0.808904
TOMM34	-0.808904
TSR1	-0.808904
TUBB4B	-0.808904
WDR37	-0.808904
YTHDF1	-0.808904
CTNNBL1	-0.807742
EIF2S2	-0.807742
CKB	-0.807576
KIAA0368	-0.807046
FBXO7	-0.806583
MRPL12	-0.806583
UMPS	-0.786425
NPLOC4	-0.784504
PPP1CC	-0.77967
STK24	-0.77967
TAF4	-0.77967
ARFGAP1	-0.777608
HNRNPA0	-0.772941
ITGB1	-0.759998
DAP3	-0.759446
LDHA	-0.753192
CLNS1A	-0.750288
SIPA1L2	-0.739848
UHRF1BP1	-0.739848
PNPLA8	-0.739848
PANK4	-0.739848
CSNK2A2	-0.739848
PPP3CA	-0.739848
HARS	-0.739848
FYN	-0.739848
SNX12	-0.739848
CDV3	-0.739848
OSBPL6	-0.739848
POLR3C	-0.739848
UBL4A	-0.739848
SPECC1	-0.739848
STX4	-0.739848
TOM1L1	-0.739848
USP6NL	-0.739848
LARP7	-0.739848
TMEM9B	-0.739848
IRF2BP2	-0.739848
JMJD1C	-0.739848
TRPM7	-0.739848
KDELC2	-0.739848
TRPM4	-0.739848
SUGP2	-0.739848
LAGE3	-0.739848
KCNB2	-0.739848
CMTM8	-0.739848
LOC388849	-0.739848
GCDH	-0.739848
TM9SF2	-0.739848
HIP1R	-0.739848
ERCC4	-0.739848
PPP1R2	-0.739848
EEFSEC	-0.739848
SENP2	-0.739848
TPPP	-0.739848
FAM82A2	-0.739848
CRNKL1	-0.739848
TMEM101	-0.739848
AP4M1	-0.739848
SUCLG2	-0.739848
UBE3D	-0.739848
TPI1	-0.739848
FAM134C	-0.739848
PARP16	-0.739848
KCMF1	-0.739848
TIMM8A	-0.739848
HOOK1	-0.739848
IGHMBP2	-0.739848
GNPDA1	-0.739848
SCAMP4	-0.739848
PFDN1	-0.739848
MTM1	-0.739848
MYO1D	-0.739848
TTC39A	-0.739848
PTGR1	-0.739848
TMEM68	-0.739848
PHC2	-0.739848
PTPLB	-0.739848
C2CD2L	-0.739848
FGF13	-0.739848
UBA3	-0.739848
PTPRD	-0.739848
DMAP1	-0.739848
PNISR	-0.739848
ARID3B	-0.739848
HELLS	-0.739848
MRPS6	-0.739848
BRMS1L	-0.739848
ERC2	-0.739848
FARP2	-0.739848
RAPGEF6	-0.739848
RDBP	-0.739848
MASTL	-0.739848
PDPK1	-0.739848
MED20	-0.739848
PSMA6	-0.739848
CDCA8	-0.739848
WDR45	-0.739848
AVL9	-0.739848
TBPL1	-0.739848
MED1	-0.739848
IFNGR1	-0.739848
PIP4K2B	-0.739848
NUSAP1	-0.739848
MNF1	-0.739848
GTF2E1	-0.739848
RACGAP1	-0.739848
ELAVL2	-0.739848
STX17	-0.739848
PIGT	-0.739848
SDF2	-0.739848
WRNIP1	-0.739848
MPZL2	-0.739848
TNKS1BP1	-0.739848
YIPF5	-0.739848
GON4L	-0.739848
FRAT1	-0.739848
FAM171B	-0.739848
SASS6	-0.739848
ZDHHC20	-0.739848
SLC39A6	-0.739848
PTPN14	-0.739848
SYP	-0.739848
NOMO1	-0.739848
PARG	-0.739848
RBM26	-0.739848
TMEM59	-0.739848
[truncated: 1,791 more rows]

## Sheet: F508 to Ork log2FC
F508 to Ork log2FC
PreyGene	Fold Change
EXOC3	4.63297
EPS15L1	4.37882
LRP8	3.58496
TUBB2A	3.55851
LRBA	3.54105
CPD	3.36877
HSPA6	3
KIAA1274	3
TMEM2	3
STX10	2.93923
FERMT2	2.80735
SNX1	2.67929
RAB11FIP2	2.66221
STX6	2.66221
SLC9A3R2	2.58702
IGF2R	2.58496
DEPDC1B	2.5278
CFL2	2.50335
VAMP2	2.50208
ARL13B	2.48203
STEAP3	2.46239
C1orf226	2.4454
AGFG1	2.41414
C15orf38-AP3S2	2.41414
EPS15	2.41414
GPRC5C	2.41414
RAB11FIP5	2.41414
NOS1AP	2.34978
OCLN	2.3244
EPHA2	2.32193
CBX1	2.32193
MYL12A	2.32193
STEAP2	2.32193
VANGL2	2.32193
EZR	2.28175
SLC9A3R1	2.26015
PSTPIP2	2.22342
SMAP2	2.22342
EPB41L3	2.22188
C9orf86	2.17354
SNAP23	2.15164
ADCY9	2.12789
ANO6	2.11437
EHD1	2.11437
RAB23	2.11437
SLC7A2	2.11437
TMTC3	2.11437
DSG2	2.09192
WDR11	2.07183
SEMA4C	2.06751
AP2B1	2.03111
SLC4A7	2.00271
APBB1	2
GLTSCR1	2
KIAA1549	2
PLS1	2
SFT2D1	2
SPTBN1	2
BTF3	1.99784
SCAMP1	1.96766
GDI2	1.9105
MCTS1	1.9105
PODXL	1.9105
DHPS	1.87578
MLLT4	1.87578
VPS45	1.87578
YES1	1.87578
SCRIB	1.87381
SLC6A15	1.83379
RAB11FIP1	1.82466
GORASP2	1.812
PPP2R5D	1.812
SNX6	1.812
ARFIP1	1.80504
CAPZA2	1.77967
ACTR1A	1.7635
ABCA3	1.73552
ADNP	1.73552
DST	1.73552
LRP2	1.73552
MAPK1	1.73552
NDUFA12	1.73552
NLRX1	1.73552
NXN	1.73552
PRKAR2B	1.73552
STAM	1.73552
SYS1	1.73552
VPS4B	1.73552
CLINT1	1.7266
AIP	1.70294
CXADR	1.70294
FAM134B	1.70294
YWHAZ	1.70294
LRRC8D	1.67997
UBE2L3	1.67429
PPP2CA	1.63691
MPDU1	1.58857
ZNF638	1.58857
CPNE8	1.58702
ATP6V1A	1.58496
TLN1	1.58496
AP2A2	1.58496
APPL1	1.58496
C20orf43	1.58496
CHORDC1	1.58496
COPS3	1.58496
CYCS	1.58496
DPYSL4	1.58496
EHBP1	1.58496
EIF4B	1.58496
GIGYF2	1.58496
GRAMD1A	1.58496
ITGA6	1.58496
LPCAT2	1.58496
MAPK9	1.58496
NBEA	1.58496
PDLIM5	1.58496
PGAM1	1.58496
RALGAPB	1.58496
VAMP8	1.58496
WDR44	1.58496
ZC3H4	1.58496
ZKSCAN3	1.58496
FIS1	1.58208
LPGAT1	1.58208
ACTA2	1.55827
SNAP29	1.53799
PICALM	1.53107
RCN1	1.50335
LIMA1	1.46435
PIH1D1	1.46435
PKMYT1	1.46435
EPB41L2	1.45943
HIST1H2AA	1.44896
ST13	1.44615
CNIH4	1.44188
WDR18	1.44188
ACOT2	1.41684
ADRM1	1.41684
ARL6IP4	1.41684
ATL1	1.41684
CARS	1.41684
CSTF2	1.41684
DBNL	1.41684
DNAJC8	1.41684
EIF3C	1.41684
EPCAM	1.41684
ERO1LB	1.41684
FAM135A	1.41684
INTS4	1.41684
ITGAV	1.41684
LSR	1.41684
OLA1	1.41684
PIN4	1.41684
RALGAPA1	1.41684
RFT1	1.41684
SFXN4	1.41684
SLC1A1	1.41684
STX16	1.41684
SUGP2	1.41684
TMEM57	1.41684
UBE2O	1.41684
VAMP7	1.41684
SLC6A8	1.39698
STX7	1.39322
ORC5	1.37452
PCK2	1.37452
TIAL1	1.37452
HSPA4	1.36463
STX12	1.35426
SLC35F2	1.34142
44082	1.3241
ARPC4	1.3241
OCRL	1.3241
RRM2	1.3241
TEX10	1.3241
YWHAB	1.3241
FAM91A1	1.32193
IDH2	1.32193
TOMM6	1.32193
PREB	1.30779
USP39	1.28885
KIF5B	1.28722
CHMP5	1.28302
CNN3	1.28302
HMGB1	1.28302
RER1	1.28302
SCP2	1.28302
CAP1	1.26448
TFRC	1.26303
CUL4B	1.26015
EPB41	1.26015
FIP1L1	1.26015
HEATR2	1.26015
PDZD8	1.26015
WIPI2	1.24537
SCYL2	1.22342
UHRF1	1.22342
XIAP	1.22342
PDLIM1	1.2228
ARHGAP1	1.2221
ABCB1	1.22033
ABCC4	1.22033
ATP6V0A1	1.22033
ATP9A	1.22033
C6orf72	1.22033
CALU	1.22033
CAND2	1.22033
CCDC6	1.22033
DSC2	1.22033
FECH	1.22033
ITGA2	1.22033
MICAL3	1.22033
MPP1	1.22033
MYOM2	1.22033
NANP	1.22033
PAIP1	1.22033
PDE8A	1.22033
PHF17	1.22033
PRPF38B	1.22033
RAB3D	1.22033
SBDS	1.22033
SDCBP	1.22033
SLC48A1	1.22033
SLC6A6	1.22033
SMAD2	1.22033
SRC	1.22033
STAM2	1.22033
TIA1	1.22033
TMEM8C	1.22033
TOP2B	1.22033
TSPAN3	1.22033
UBQLN1	1.22033
SLC38A2	1.19954
CHP	1.19381
GTF3C4	1.19381
SEC24C	1.19381
SLK	1.19381
SLC3A2	1.18745
ITGB1	1.17597
PLS3	1.17597
BTN3A3	1.17354
DCTN2	1.17354
FNDC3A	1.17354
METTL11A	1.17354
ND1	1.17354
RAVER1	1.17354
SH3GLB1	1.17354
TMEM87A	1.17354
UFM1	1.17354
VAMP3	1.1692
EXOC4	1.16812
UBE2K	1.16812
RRM1	1.16
CDC73	1.15272
TXNDC5	1.15272
NME1-NME2	1.14535
DDX42	1.13829
RABL3	1.13829
TEX264	1.13829
TUBA1C	1.13728
CAPN1	1.13593
CTNNA1	1.13593
EI24	1.13593
GANAB	1.13593
KRR1	1.13593
MRPL14	1.13593
NUDCD2	1.13593
PCMT1	1.13093
TPD52L2	1.12422
CNN2	1.11437
IBA57	1.11437
LPCAT1	1.11437
MTA2	1.11437
PES1	1.11437
SLC12A2	1.11437
TOR1AIP2	1.11437
NDRG1	1.08651
PFDN5	1.07724
ATP6AP1	1.06744
EIF4EBP1	1.06345
MDC1	1.06345
PDIA3	1.05556
ATP13A1	1.00541
DENND4C	1.00541
DNAJC10	1.00541
PPP1CB	1.00541
RARS2	1.00541
SGPL1	1.00541
TWF1	1.00541
UGDH	1.00541
CERS2	1.00309
SMARCC1	1.00309
PFAS	1.00216
CACYBP	1.00114
CISD2	1.00114
AP3S1	1
ATP6V1B2	1
CD2AP	1
CTNND1	1
GCLM	1
OPA1	1
SSRP1	1
ALDH2	1
ALG1	1
APPL2	1
APRT	1
ATG2B	1
ATP5J	1
C19orf6	1
C21orf59	1
C8orf86	1
CDKN2A	1
CHMP4B	1
COL6A6	1
CTSE	1
DCTD	1
DDX41	1
DVL2	1
EHD3	1
EIF1	1
ERGIC2	1
ERH	1
FAM21A	1
FAM50A	1
G3BP2	1
GFM1	1
GLT25D1	1
GLUD2	1
GRIN2B	1
GTF2IRD1	1
HBS1L	1
HN1	1
HSD17B7	1
ILKAP	1
ITGA5	1
KDELR1	1
KIAA0020	1
KIAA1731	1
KLC1	1
NVL	1
OSBPL2	1
OSGEP	1
PABPN1	1
PGP	1
PODXL2	1
POLDIP2	1
PSEN1	1
RCL1	1
RPRD1B	1
SAMD4B	1
SET	1
SGTA	1
SMAP1	1
SNCA	1
SRI	1
ST7	1
STAG2	1
STK38	1
SYPL2	1
TBC1D5	1
TBCE	1
TPI1	1
TRIM9	1
UBE2V1	1
UBIAD1	1
UTP3	1
VCL	1
VCPIP1	1
ZMYM3	1
VANGL1	0.998455
EIF3I	0.998033
FDFT1	0.998033
SNX3	0.998033
ELOVL5	0.997296
NUDT5	0.997296
BET1	0.995674
CPSF3	0.995674
EIF4E	0.995674
FLOT2	0.995674
MYO1C	0.995674
NASP	0.995674
PEX19	0.995674
REEP6	0.995674
TTN	0.995674
TXLNG	0.995674
USP19	0.995674
YWHAE	0.95977
DNAJB1	0.95316
AHNAK	0.951588
HN1L	0.946502
NUDCD3	0.946502
LEMD3	0.941684
DCXR	0.939227
EIF5	0.93557
POR	0.935551
EFHD2	0.931575
PRMT1	0.931575
ZC3HAV1	0.93005
IMPDH2	0.92925
YKT6	0.920827
AHCY	0.918386
ATP6	0.918386
CDK5RAP3	0.918386
DAP3	0.918386
DRG1	0.917113
TUBB4B	0.910035
ADD3	0.905088
CMPK1	0.905088
DAZAP1	0.905088
DYNLT1	0.905088
KIAA1429	0.905088
RAB18	0.905088
TMEM48	0.899949
ADCK3	0.894037
VAT1	0.892609
ECHDC1	0.87578
MOSPD2	0.87578
PSMD8	0.87578
SLC38A1	0.87578
LUC7L3	0.874469
SNX2	0.86542
STMN1	0.86542
AK1	0.861907
MAPRE1	0.85938
PSMC1	0.85938
NUP155	0.848574
STIP1	0.847997
STUB1	0.847585
EDC3	0.845114
MTAP	0.845114
NMD3	0.845114
PRKAR2A	0.845114
RAB10	0.845114
ASNS	0.830526
PEF1	0.829173
SUB1	0.829173
H1FX	0.82486
CDC37	0.822254
TRIM13	0.813526
ACBD3	0.808904
ALDOA	0.808904
ATP6V1C1	0.808904
ATXN7L3B	0.808904
CCDC134	0.808904
CCDC168	0.808904
DENR	0.808904
GTF2B	0.808904
HDDC3	0.808904
LARP4	0.808904
METTL7A	0.808904
MRPL47	0.808904
NCSTN	0.808904
NUP35	0.808904
PMVK	0.808904
SRRM2	0.808904
TCEB2	0.808904
TKT	0.808904
TRAM1	0.808904
UBTF	0.808904
VKORC1L1	0.808904
NMT1	0.807742
C20orf4	0.807355
FUBP1	0.807355
PRAF2	0.807355
HPRT1	0.807046
ACOT1	0.806583
ATP6V0C	0.806583
EFNB1	0.806583
ICMT	0.806583
RAB13	0.806583
RBM42	0.806583
RPL34	0.806583
SARS2	0.806583
USP9X	0.806583
FKBP4	0.802273
DPYSL3	0.786425
PRPS2	0.786425
SMPD4	0.786425
STIM1	0.786425
HSD17B4	0.784504
HMOX2	0.783806
ACADSB	0.77967
BCKDHB	0.77967
KIAA1715	0.77967
TARS	0.77967
TMEM165	0.77967
CAMLG	0.776577
SUGT1	0.774462
UQCRFS1	0.772941
DCTN1	0.767827
GTF2I	0.767827
UBE2I	0.759446
DNAJC7	0.746431
44080	0.739848
ADSL	0.739848
AGPAT5	0.739848
AIF1L	0.739848
AKAP1	0.739848
ANK3	0.739848
ANKRD28	0.739848
ARHGEF7	0.739848
ARIH2	0.739848
ATP5D	0.739848
ATP6V0A2	0.739848
BANF1	0.739848
BASP1	0.739848
BIRC6	0.739848
C15orf63	0.739848
C1orf27	0.739848
CALD1	0.739848
CANT1	0.739848
CASP2	0.739848
CCNYL2	0.739848
CEP152	0.739848
CFH	0.739848
CNOT2	0.739848
COLEC12	0.739848
COQ6	0.739848
CORO7-PAM16	0.739848
CPSF3L	0.739848
CS	0.739848
DHX8	0.739848
DNAJC3	0.739848
DPY19L3	0.739848
DVL1	0.739848
EIF2AK3	0.739848
ENDOV	0.739848
EXOC5	0.739848
EXOSC2	0.739848
EXOSC4	0.739848
FCRL6	0.739848
FLAD1	0.739848
FLII	0.739848
GALNT2	0.739848
GFOD1	0.739848
GOLT1B	0.739848
GPATCH8	0.739848
GPRC5A	0.739848
GPRC5B	0.739848
GRPEL1	0.739848
HDGFRP2	0.739848
INPP5B	0.739848
JAM3	0.739848
KCMF1	0.739848
KIF4A	0.739848
LGMN	0.739848
LOC100996470	0.739848
LRRFIP1	0.739848
MACF1	0.739848
MDH2	0.739848
MKRN2	0.739848
MLF2	0.739848
MRPL10	0.739848
MRPS11	0.739848
MRPS2	0.739848
MRPS30	0.739848
MRPS35	0.739848
N4BP1	0.739848
N4BP3	0.739848
NAA11	0.739848
NAF1	0.739848
NAT14	0.739848
NCAPD2	0.739848
NCBP2	0.739848
NDUFAF4	0.739848
NDUFB3	0.739848
NFXL1	0.739848
NOL10	0.739848
NOSIP	0.739848
NOTCH2	0.739848
NRAS	0.739848
NUPL1	0.739848
PATL1	0.739848
PDIA4	0.739848
PHF21B	0.739848
POLR3A	0.739848
PPP1R10	0.739848
PRRC2C	0.739848
PRSS2	0.739848
RAB35	0.739848
RCOR1	0.739848
RPS29	0.739848
SAMM50	0.739848
SLC25A15	0.739848
SLC25A17	0.739848
SLC30A4	0.739848
SLC30A9	0.739848
SLCO4C1	0.739848
SPG21	0.739848
SRSF8	0.739848
STIM2	0.739848
SUN5	0.739848
SYMPK	0.739848
TFCP2	0.739848
TMA16	0.739848
TMEM30A	0.739848
TMEM70	0.739848
TMOD1	0.739848
TOMM5	0.739848
TOMM7	0.739848
TPT1	0.739848
TXNDC9	0.739848
TYMS	0.739848
UBE2D1	0.739848
UBE2E2	0.739848
UFSP2	0.739848
VPS33B	0.739848
VWF	0.739848
WDR12	0.739848
WDR13	0.739848
WDR33	0.739848
WDR6	0.739848
YIF1A	0.739848
YIPF5	0.739848
YWHAG	0.739848
ZFYVE16	0.739848
TTC1	0.737687
CAPZA1	0.737378
CSDE1	0.737254
AP1B1	0.736966
HIST1H1C	0.736966
SRSF2	0.736966
TOMM34	0.736966
DNAJC1	0.735522
EEF1A2	0.735522
ELOVL1	0.735522
FAM98B	0.735522
HSPE1-MOB4	0.735522
LPCAT3	0.735522
NDUFB4	0.735522
NECAP2	0.735522
WBP11	0.735522
MTA1	0.718528
CTTN	0.711149
ATXN10	0.701896
SPCS2	0.701896
ARL6IP5	0.70044
EEF1B2	0.70044
FLNB	0.699711
EIF3G	0.697527
HSPA14	0.697527
JUP	0.697527
MAD2L1	0.697527
YWHAQ	0.696417
SKIV2L2	0.694721
DPYSL2	0.692988
DYNLRB1	0.692988
PRPF6	0.692988
SLC33A1	0.692988
WDR41	0.688553
HNRNPR	0.684874
U2AF1	0.684874
birA	0.679666
HSPH1	0.678613
MRPL12	0.678072
SRP54	0.678072
AGPAT6	0.677802
ARAF	0.676992
DDX23	0.676992
FAM213A	0.676992
GLRX3	0.676992
GNB1L	0.676992
KPNA3	0.676992
LANCL2	0.676992
LRP1B	0.676992
PPP1CA	0.676992
PSMF1	0.676992
RBM17	0.676992
TBL2	0.676992
UTP18	0.676992
EFTUD2	0.667849
ACOT7	0.666576
ADD1	0.662206
NPLOC4	0.662206
PDHA1	0.662206
PRAMEF18	0.662206
SLC1A3	0.662206
EIF3J	0.65545
KIAA1524	0.65545
MARCKS	0.65545
STX18	0.65545
UBE3C	0.65545
VAPA	0.652077
BUB3	0.650391
CBS	0.650391
CKAP5	0.650391
PSMD12	0.650391
SRP72	0.644181
SRP68	0.643694
CKB	0.641154
INA	0.63846
PGLS	0.63846
NOP56	0.637688
NDUFV2	0.636915
RANGAP1	0.633375
NAP1L1	0.632862
CORO1B	0.631082
EIF5A	0.631082
USP7	0.631082
ATP1B3	0.628263
TRIM25	0.627569
PDAP1	0.62332
TNPO1	0.62332
ABCD3	0.620326
SAR1A	0.61909
PGD	0.617298
ACOT9	0.613965
ABCE1	0.605506
SYAP1	0.601281
CYB5R3	0.601165
NPM1	0.60085
AASDHPPT	0.588574
ACTN4	0.588574
ARL3	0.588574
ATOX1	0.588574
ATPAF2	0.588574
BTF3L4	0.588574
LSM4	0.588574
NDUFB11	0.588574
OSBPL9	0.588574
PFDN6	0.588574
PI4KA	0.588574
PNKD	0.588574
QSOX2	0.588574
RBM14-RBM4	0.588574
RETSAT	0.588574
ROCK2	0.588574
SAP30BP	0.588574
TWF2	0.588574
TXLNA	0.588574
WDR81	0.588574
ZMYM6NB	0.588574
COPB2	0.586406
DHX36	0.586406
EXOSC8	0.586406
GHR	0.586406
RAP1B	0.586406
RAE1	0.585618
CLPTM1L	0.584963
DNAJB12	0.584963
JPH1	0.584963
KDSR	0.584963
LNPEP	0.584963
MRPL40	0.584963
MSH3	0.584963
NCLN	0.584963
NDUFB9	0.584963
NUP210	0.584963
NUP54	0.584963
PDXDC1	0.584963
PRDX5	0.584963
PTPN2	0.584963
RHOG	0.584963
SPG20	0.584963
VEZT	0.584963
AGPAT9	0.584241
HSPBP1	0.583932
MLEC	0.583932
NDUFAF2	0.58316
RPN2	0.579313
GSPT1	0.562849
ARL1	0.561413
BLVRA	0.559672
RTN4	0.557106
C8orf55	0.551885
RPL36	0.551885
SKP1	0.551885
NDUFS1	0.551064
TACC1	0.551064
TMEM33	0.547838
PSMD1	0.545482
DHFR	0.544733
LRRC47	0.544733
SURF4	0.542626
GCN1L1	0.538517
ANXA11	0.538355
GPR89A	0.538355
HUWE1	0.538355
MRPL41	0.538355
SPC24	0.538355
MCM2	0.535829
USP14	0.533839
MAP4	0.531069
TMEM43	0.529405
WDR61	0.529405
SNRPD1	0.525091
PDHB	0.520205
DDRGK1	0.519039
CSTF2T	0.515192
ERP29	0.515192
LCP1	0.515192
MBD3	0.515192
MXRA7	0.515192
P4HB	0.515192
PPIB	0.515192
PTGES3	0.515192
QARS	0.515192
VRK2	0.514573
GTPBP4	0.51445
H2AFZ	0.514264
HELZ	0.514264
NDUFS7	0.514264
PSMC2	0.507921
AP2M1	0.50772
NCAPG	0.503349
TFAM	0.503349
ADAR	0.502712
MTDH	0.5025
ATP6AP2	0.502076
LRPPRC	0.499828
TMPO	0.499535
PAICS	0.499425
CDC42	0.49467
DHRS7	0.49467
ISOC2	0.49467
RPS28	0.49342
PTPN1	0.49285
ILF2	0.488562
DDX50	0.4879
LAMC2	0.4879
EEF2	0.486687
AGPAT1	0.486416
EIF4G1	0.485427
RPP30	0.485427
RRP1B	0.485427
CARM1	0.480482
CKAP2	0.480482
CNOT1	0.480482
FAHD1	0.480482
FASTKD2	0.480482
FKBP11	0.480482
GSK3A	0.480482
IFIT5	0.480482
IST1	0.480482
LIG3	0.480482
LOC100507855	0.480482
LRRC57	0.480482
MAK16	0.480482
MRPL24	0.480482
NDUFB10	0.480482
PLP2	0.480482
PRIM2	0.480482
PRRC2A	0.480482
RAB8A	0.480482
SMARCD1	0.480482
SRSF10	0.480482
TMEM115	0.480482
TMX4	0.480482
TSN	0.480482
PDCD5	0.478563
BAG2	0.473354
MST4	0.473354
SLC1A5	0.470687
RFC2	0.470595
FKBP8	0.468931
NDUFA9	0.468931
TMEM93	0.466161
EIF3A	0.463089
EIF3D	0.459678
STRAP	0.459678
UQCRC1	0.459678
SEC11A	0.459432
CHTOP	0.45894
DNAJC9	0.45894
LYAR	0.45894
NAA50	0.45894
OXSR1	0.45894
PTPN11	0.45894
SENP3	0.45894
CORO1C	0.454176
EMD	0.45017
SRPR	0.449788
PFN1	0.448115
RCC2	0.447721
ARFGAP1	0.446148
ECI1	0.446148
NHP2L1	0.446148
TIPRL	0.446148
UBXN1	0.446148
COPG2	0.444932
DNM2	0.44449
ATP2B1	0.443759
BSG	0.443759
CKAP4	0.443645
DHX30	0.440573
ALDH7A1	0.438783
CECR5	0.438783
EWSR1	0.438783
NDUFA5	0.438783
SH3GL1	0.438783
HLA-A	0.435878
SCAMP3	0.432238
WARS	0.431803
AAAS	0.429542
ARF6	0.429542
CCT4	0.426891
SSR4	0.424118
ACIN1	0.41684
ACP1	0.41684
BRF1	0.41684
CLGN	0.41684
MCU	0.41684
NCKAP1	0.41684
OXA1L	0.41684
PDS5A	0.41684
POT1	0.41684
RAB7L1	0.41684
RAP2C	0.41684
RBM4	0.41684
RPL29	0.41684
SACM1L	0.41684
SART1	0.41684
SORD	0.41684
TIMM23	0.41684
PARP1	0.415162
VDAC1	0.415125
CCDC115	0.415037
DRG2	0.415037
EIF3L	0.415037
EIF4H	0.415037
HSDL2	0.415037
KIAA0564	0.415037
NME1	0.415037
PRPF31	0.415037
RPL27	0.415037
SEC23IP	0.415037
UCHL1	0.415037
IDI1	0.414522
DNAJC2	0.414136
EIF2AK2	0.414136
IDH3A	0.414136
UFD1L	0.414136
ABCC1	0.411426
ADPGK	0.411426
ADPRHL2	0.411426
AK3	0.411426
ALG3	0.411426
ALG6	0.411426
ANO8	0.411426
ANXA5	0.411426
AP1G1	0.411426
ARFIP2	0.411426
ARHGEF1	0.411426
ARRB2	0.411426
ATG4B	0.411426
ATP2C1	0.411426
ATP6V1D	0.411426
ATRX	0.411426
ATXN7L1	0.411426
AUTS2	0.411426
BCAS3	0.411426
BCKDK	0.411426
BET1L	0.411426
BNIP2	0.411426
BRAP	0.411426
BRP44	0.411426
C10orf105	0.411426
C11orf83	0.411426
C17orf62	0.411426
C19orf52	0.411426
C1orf43	0.411426
C7orf50	0.411426
C9orf142	0.411426
C9orf79	0.411426
CARS2	0.411426
CBX5	0.411426
CCAR1	0.411426
CCDC132	0.411426
CCDC88A	0.411426
CD276	0.411426
CDC123	0.411426
CDC16	0.411426
CHD1	0.411426
CHD7	0.411426
CHD8	0.411426
CHMP6	0.411426
CISD1	0.411426
CLCN7	0.411426
CLMN	0.411426
COL6A3	0.411426
CPT2	0.411426
CRNKL1	0.411426
CSNK1G3	0.411426
CTDNEP1	0.411426
CWC15	0.411426
CWC22	0.411426
CWF19L1	0.411426
CYB5A	0.411426
DCAF13	0.411426
DDX28	0.411426
DDX51	0.411426
DEFB121	0.411426
DGKE	0.411426
DHRS13	0.411426
DMAP1	0.411426
DMD	0.411426
DNAJC18	0.411426
DNTTIP2	0.411426
DOLK	0.411426
DTX3L	0.411426
EBAG9	0.411426
EGLN1	0.411426
EIF1AY	0.411426
EIF2B5	0.411426
ELAVL2	0.411426
EPHX4	0.411426
FAM105A	0.411426
FAM195B	0.411426
FAM46D	0.411426
FASTKD5	0.411426
FHOD1	0.411426
FITM2	0.411426
FRG1	0.411426
GCA	0.411426
GCAT	0.411426
GEMIN4	0.411426
GNAQ	0.411426
GOSR1	0.411426
GPATCH1	0.411426
GPR150	0.411426
GRAMD2	0.411426
GTF2F2	0.411426
GTPBP3	0.411426
GUF1	0.411426
HARS	0.411426
HAUS6	0.411426
HIST1H4G	0.411426
HOXA10	0.411426
HPS5	0.411426
HS1BP3	0.411426
ILK	0.411426
INTS5	0.411426
ITGA4	0.411426
KDELC2	0.411426
KDM1A	0.411426
KEAP1	0.411426
KRI1	0.411426
LASP1	0.411426
LDLRAP1	0.411426
LEPRE1	0.411426
LIMD1	0.411426
LMCD1	0.411426
LMTK2	0.411426
LOC100996820	0.411426
LOC101060541	0.411426
LRRC8A	0.411426
LTV1	0.411426
MAGEA6	0.411426
MAP2K4	0.411426
MAP7D3	0.411426
MARVELD2	0.411426
MAVS	0.411426
MBLAC2	0.411426
MCAM	0.411426
METAP2	0.411426
MICALL1	0.411426
MINA	0.411426
MLL5	0.411426
MOCS2	0.411426
MOV10	0.411426
MRPL17	0.411426
MRPL27	0.411426
MRPL46	0.411426
MRPL53	0.411426
MRPL54	0.411426
MRPS27	0.411426
MRPS9	0.411426
MT1A	0.411426
MTFP1	0.411426
MYH7	0.411426
MYO1A	0.411426
MYO1F	0.411426
NAA16	0.411426
NAPA	0.411426
NCK1	0.411426
ND4	0.411426
NDUFS6	0.411426
NEK9	0.411426
NIP7	0.411426
NIPAL3	0.411426
NKAP	0.411426
NOTCH1	0.411426
NR1D2	0.411426
NR2F2	0.411426
ORC2	0.411426
OSBPL11	0.411426
PANK4	0.411426
PAPSS1	0.411426
PARL	0.411426
PARS2	0.411426
PDK1	0.411426
PEBP1	0.411426
PER2	0.411426
PFDN1	0.411426
PGK1	0.411426
PGK2	0.411426
PIGT	0.411426
PIN1	0.411426
PIP4K2C	0.411426
PITPNA	0.411426
PLA2G7	0.411426
PLCXD2	0.411426
PLEK	0.411426
PLEKHA1	0.411426
PLEKHA5	0.411426
PLEKHG3	0.411426
PLK1	0.411426
PLXNA4	0.411426
PMS1	0.411426
PNPT1	0.411426
POLE4	0.411426
POLR2I	0.411426
POLR2J3	0.411426
POP1	0.411426
PPIG	0.411426
PPIH	0.411426
PPP6C	0.411426
PRKAA2	0.411426
PRKCD	0.411426
PRKCSH	0.411426
PRMT5	0.411426
PRPF38A	0.411426
PRRC1	0.411426
PSAT1	0.411426
PSMA1	0.411426
PTPN13	0.411426
PTPN9	0.411426
PTPRJ	0.411426
PVRL2	0.411426
PYCRL	0.411426
RAB27A	0.411426
RABGAP1	0.411426
RAD51	0.411426
RAF1	0.411426
RBBP6	0.411426
RBM27	0.411426
RET	0.411426
RFTN1	0.411426
RHBDD3	0.411426
RIC8A	0.411426
RICTOR	0.411426
RINT1	0.411426
RNMTL1	0.411426
ROS1	0.411426
RPA3	0.411426
RPL3L	0.411426
SCIN	0.411426
SCN11A	0.411426
SCYL3	0.411426
SEC24B	0.411426
SFT2D2	0.411426
SHC1	0.411426
SKA1	0.411426
SLC27A3	0.411426
SLC30A1	0.411426
SLC35E1	0.411426
SLC39A10	0.411426
SLC39A6	0.411426
SLIRP	0.411426
SLPI	0.411426
SMAD9	0.411426
SMC6	0.411426
SNAP47	0.411426
SNX27	0.411426
SPAG9	0.411426
SREK1	0.411426
STK4	0.411426
SUCLG2	0.411426
SUPT6H	0.411426
SV2A	0.411426
SYCP2	0.411426
TAF9B	0.411426
TAP1	0.411426
TES	0.411426
THOC5	0.411426
THTPA	0.411426
TIMM8A	0.411426
TJP1	0.411426
TK1	0.411426
TM7SF2	0.411426
TMED4	0.411426
TMEM161A	0.411426
TMEM192	0.411426
TNNI1	0.411426
TRMT2A	0.411426
TROVE2	0.411426
TSC1	0.411426
UBA5	0.411426
UBAP2	0.411426
UBE2S	0.411426
UBXN2B	0.411426
UCK1	0.411426
USP46	0.411426
UTRN	0.411426
VPS35	0.411426
YIF1B	0.411426
YLPM1	0.411426
YTHDF3	0.411426
ZC3H11A	0.411426
ZCCHC8	0.411426
ZNF423	0.411426
ZNF512	0.411426
ZNF622	0.411426
ZW10	0.411426
PTBP1	0.406125
TECR	0.404815
SAE1	0.401115
VAPB	0.399703
TAGLN2	0.39959
EIF2S3	0.395838
VDAC3	0.393772
EIF3M	0.393219
MSH6	0.393219
PRKACA	0.393219
PRPSAP2	0.393219
NUDC	0.390116
RPL30	0.388982
UBE2D3	0.388982
NNT	0.386044
SAR1B	0.386044
NACA	0.384971
WWOX	0.384945
HNRNPH3	0.381535
DKC1	0.378845
SUPT5H	0.378845
TPD52	0.378845
IPO5	0.374189
FASN	0.37288
PPA1	0.370945
CRKL	0.370756
HNRNPF	0.370353
IRS4	0.369069
UBXN4	0.365712
EIF2A	0.364633
NDUFA6	0.364633
POLR2H	0.364633
PSMD13	0.364633
SCARB1	0.364633
TSR1	0.364633
USP5	0.364633
SEC23A	0.363085
UBE2N	0.357172
FBL	0.355168
HNRNPK	0.354596
DNAJA2	0.350858
LSG1	0.350585
RPS5	0.350585
COX4NB	0.350317
PPP2R1A	0.349532
HK1	0.348064
DLAT	0.347642
MYEF2	0.347642
PHGDH	0.347173
C1QBP	0.344806
HSP90B1	0.344787
HSD17B12	0.341037
ITPA	0.340277
SEC24A	0.340277
MMGT1	0.337794
PRPF8	0.337225
HNRNPH2	0.337035
TIMM13	0.334289
PCBP1	0.331895
PABPC1	0.330064
ACAA2	0.328422
AGPAT3	0.328422
APH1A	0.328422
ARL8A	0.328422
ATG9A	0.328422
ATL2	0.328422
BAG3	0.328422
BTN3A2	0.328422
C11orf2	0.328422
CCDC43	0.328422
CDK11A	0.328422
CDK2AP1	0.328422
CELF2	0.328422
CPSF1	0.328422
CSTF1	0.328422
CTR9	0.328422
CYC1	0.328422
DHX33	0.328422
DPYSL5	0.328422
FN3KRP	0.328422
GNAI2	0.328422
GPN3	0.328422
IKBIP	0.328422
IMP3	0.328422
ITCH	0.328422
KAT7	0.328422
KATNAL1	0.328422
LCK	0.328422
LIN7A	0.328422
LIPA	0.328422
MAFG	0.328422
MAP4K4	0.328422
MBOAT7	0.328422
MRPS14	0.328422
NAE1	0.328422
NDUFS5	0.328422
NOB1	0.328422
NOL9	0.328422
ORC4	0.328422
PIGK	0.328422
POLR2C	0.328422
PSMB2	0.328422
PTGES2	0.328422
RCOR3	0.328422
RPA1	0.328422
SCAF4	0.328422
SLC30A6	0.328422
TNRC6A	0.328422
TRIM65	0.328422
TRIO	0.328422
TTC19	0.328422
UBXN7	0.328422
UFC1	0.328422
WDR5	0.328422
WIBG	0.328422
PPP2R2A	0.326761
ESYT1	0.326007
DCAF7	0.323551
PFKM	0.323551
TOP1	0.323551
LRRC40	0.322577
AP3B1	0.321928
MAPK3	0.321928
MYO1B	0.321928
NKRF	0.321928
PSMD7	0.321928
SF3B14	0.32063
HSPA1B	0.320297
ARPC3	0.318682
AUP1	0.318682
CDS2	0.318682
FAIM	0.318682
QTRTD1	0.318682
RCC1	0.318682
RPS12	0.317249
COPA	0.314522
HNRPDL	0.305279
SNRPE	0.304006
SLC25A5	0.303887
FARSA	0.302263
PSMC4	0.302226
ANKLE2	0.299769
EIF2B1	0.299769
GNPAT	0.299769
PGRMC2	0.297212
TOMM22	0.297212
DDX24	0.290818
GTF3C5	0.290818
MFSD10	0.290818
PPA2	0.290818
SNRPB2	0.290818
YTHDF2	0.290818
ZC3H15	0.290818
PUF60	0.288851
TPR	0.288851
DNAJA1	0.286241
SF3B3	0.285628
PARK7	0.284364
XRN2	0.28279
ACLY	0.282651
YARS2	0.282651
RPL8	0.280199
SRPRB	0.280199
RPS18	0.280062
APEX1	0.279926
CCDC124	0.279926
MAP1B	0.279926
NUP85	0.279926
CLTC	0.278817
RPL12	0.277994
EPHX1	0.277021
HNRNPA3	0.273516
AP3D1	0.27277
PCBP2	0.271345
PRPF19	0.271217
SSR1	0.271217
CCT3	0.268489
TTC35	0.268185
RPLP2	0.266689
CCT8	0.264787
ARL2	0.264478
PAK4	0.264478
RNPS1	0.264478
SCAMP2	0.264478
RPL28	0.263612
ABCF1	0.263034
FKBP3	0.263034
LBR	0.262883
AKAP8L	0.260152
ALKBH5	0.260152
ATP8	0.260152
ATPAF1	0.260152
C16orf80	0.260152
CAV1	0.260152
CSDA	0.260152
CXorf56	0.260152
DEPDC5	0.260152
DIDO1	0.260152
DPY30	0.260152
GNG12	0.260152
LYN	0.260152
MDN1	0.260152
NAA10	0.260152
NUDT1	0.260152
PAK2	0.260152
PHF5A	0.260152
PIGS	0.260152
PPT1	0.260152
RPF2	0.260152
SPCS1	0.260152
SUCLG1	0.260152
THUMPD3	0.260152
TRA2A	0.260152
TTYH3	0.260152
UCK2	0.260152
YTHDC1	0.260152
ERLIN2	0.256004
SRSF1	0.255333
RPS27L	0.252736
FLNA	0.251605
HDLBP	0.250962
SEC23B	0.250962
ATP6V1H	0.24807
SPTAN1	0.24807
DDX47	0.247928
KHDRBS1	0.247928
TOR1AIP1	0.246496
GARS	0.246189
RPS13	0.246189
HNRNPA1	0.245993
PTPLAD1	0.244495
RPS15	0.244495
DNM1L	0.244115
ATP2A2	0.243831
PGRMC1	0.243546
PDIA6	0.243175
VMA21	0.241008
44076	0.238587
44083	0.238587
CBR1	0.238587
SRSF9	0.238587
PYGL	0.237846
CFL1	0.236806
PCNA	0.23634
HSPA8	0.235905
ACSL3	0.234529
CNP	0.234338
COPZ1	0.234338
PUS1	0.234338
STAU1	0.234338
PSMD4	0.233328
ATP1A1	0.231451
ZMPSTE24	0.230698
RPL3	0.230449
HSPA5	0.228893
CAPZB	0.22856
TMED10	0.22856
NSFL1C	0.227586
RAB11B	0.227059
DARS	0.225637
CCDC86	0.223423
CSNK2A1	0.223423
KIAA0368	0.223423
TMEM199	0.223423
SF3A1	0.222805
CDKAL1	0.222392
EIF2B3	0.222392
HIST1H2BB	0.222341
CIRBP	0.221877
AIMP2	0.22033
CAPNS1	0.22033
CLNS1A	0.22033
CLTA	0.22033
GSTM3	0.22033
HMGB2	0.22033
MAN2C1	0.22033
MPP2	0.22033
MRPS22	0.22033
NHLRC2	0.22033
NOMO2	0.22033
NUDT16L1	0.22033
RAB3GAP1	0.22033
REEP5	0.22033
RTN3	0.22033
TSNAX	0.22033
SERPINH1	0.219449
SMC1A	0.219449
FUS	0.218215
RANBP1	0.216866
AFG3L2	0.211608
AGK	0.211608
CBX3	0.211608
TSFM	0.211608
MKI67	0.211504
VDAC2	0.208725
DSTN	0.207561
LUC7L2	0.207561
MYO6	0.207561
PDCL	0.207561
PROSC	0.207561
SRSF5	0.207561
UNC45A	0.207561
RPS11	0.206451
ARF4	0.205896
WDR3	0.205896
LRRC59	0.204787
C14orf166	0.203913
EIF4A3	0.203344
ACAT1	0.198843
KIAA0090	0.198719
TIMM50	0.198576
RUVBL1	0.196528
C20orf30	0.19651
CHCHD3	0.19651
DCAKD	0.19651
DNMT1	0.19651
HAT1	0.19651
KIF11	0.19651
LMF2	0.19651
NAP1L4	0.19651
NUCKS1	0.19651
NUP160	0.19651
PDCD4	0.19651
SLC7A5	0.19651
SOAT1	0.19651
TCEA1	0.19651
THOC3	0.19651
YTHDC2	0.19651
DARS2	0.196135
RPL31	0.196135
ATP5O	0.195521
LDHA	0.192645
EBP	0.190713
ATP5H	0.189852
RAB7A	0.188425
HIST1H2BD	0.188315
RRP12	0.184503
DDX18	0.184385
NUP62	0.184385
PSMD11	0.183254
C19orf63	0.180148
SPCS3	0.180148
RPS27A	0.177622
RPL18	0.176914
TMX1	0.176805
RPL17	0.17267
AP3M1	0.170827
CANX	0.170054
DHCR7	0.169925
KPNB1	0.168582
RPL9	0.168264
COX6C	0.168123
GLYR1	0.168123
KIF2A	0.168123
L2HGDH	0.168123
MPP6	0.168123
MRPS34	0.168123
MTPN	0.168123
NEB	0.168123
PCYOX1	0.168123
PPME1	0.168123
PSMA7	0.168123
SCPEP1	0.168123
TOE1	0.168123
VMP1	0.168123
DDX39B	0.165597
UQCRC2	0.165059
PSMD6	0.164669
RPL18A	0.163561
NOLC1	0.162578
RPL4	0.161952
SLC25A6	0.161269
HSP90AB1	0.159332
FANCI	0.158857
MMS19	0.158857
GAPDH	0.158168
VIM	0.157165
KHSRP	0.156821
SLC16A1	0.152724
UQCRB	0.152724
ILF3	0.152183
NUP88	0.152003
EIF3B	0.151642
HNRNPH1	0.151323
CHERP	0.15056
ILVBL	0.15056
SEC61B	0.15056
UBE2M	0.15056
ARF1	0.149403
SYNCRIP	0.148707
RPS7	0.148099
IQGAP1	0.146891
ATP5B	0.146846
PRDX3	0.146395
HIST1H3F	0.145149
MCM4	0.144238
FARSB	0.14401
HCFC1	0.14401
CAND1	0.142007
NAT10	0.140472
AP2A1	0.140258
FXR1	0.140258
GLS	0.140258
HLA-C	0.140258
PFDN2	0.140258
SMU1	0.140258
IARS	0.13643
ALG5	0.136126
SRP9	0.136126
C11orf49	0.131872
PSMD14	0.131872
TCERG1	0.131872
SEC63	0.130931
RPS8	0.130321
PABPC4	0.129244
RSL1D1	0.128
SARNP	0.126187
UBAP2L	0.126187
PSMC3	0.125531
BAZ1B	0.12422
CSTF3	0.12422
MTCH2	0.11909
RPL5	0.11909
ENO1	0.117764
SND1	0.117592
SLC25A3	0.11758
VCP	0.116701
HNRNPM	0.115477
LONP1	0.115477
C20orf3	0.114367
EIF3K	0.114367
RPAP3	0.114367
CCT2	0.114251
ARCN1	0.112504
RPS2	0.112316
NOP58	0.111445
PPIA	0.110743
GAR1	0.109056
PLOD1	0.109056
POLR2B	0.109056
SLC27A2	0.109056
SON	0.109056
CRK	0.108672
EIF4A1	0.107369
NDUFS3	0.104362
RPS21	0.103591
RAB14	0.101856
PSME1	0.100051
TOMM40	0.0997418
HSP90AA1	0.0992129
MKI67IP	0.0985055
STX8	0.0985055
TIMM23B	0.0985055
WDR36	0.0985055
ETF1	0.0976108
PSPC1	0.0973191
NDUFA10	0.0952525
EIF2S2	0.0951363
RPL13A	0.0943924
RAB21	0.0935602
RPL11	0.0935602
RAB5C	0.092884
CCT7	0.0925223
ABCB7	0.0922074
BRIX1	0.0922074
CYP51A1	0.0922074
GK	0.0922074
LMAN1	0.0922074
NUP188	0.0922074
PRKAG1	0.0922074
SF3B2	0.0922074
TBL3	0.0922074
HADHA	0.089811
EIF4G2	0.0892132
KPNA6	0.0892132
NAMPT	0.0877129
IGF2BP3	0.0865877
HSPA9	0.0863309
DHX9	0.0859823
MARS	0.0846828
CSE1L	0.0833789
PHB	0.0823409
UBE2J1	0.0816138
PDCD6IP	0.0811025
PRDX6	0.0801703
TUBB	0.0800431
RPSA	0.0794199
XPO1	0.0788684
RPL10	0.0783821
MAGT1	0.077243
OCIAD1	0.077243
SDHA	0.077243
ZNF74	0.077243
NPEPPS	0.0756982
G3BP1	0.075275
PSMD2	0.075275
LARS	0.0745738
RPS17	0.0740006
GMPS	0.0703893
EBNA1BP2	0.0696682
NT5DC2	0.0696682
SEC22B	0.0696682
SEC61A1	0.0696682
DHX15	0.0690564
HSD17B10	0.0690564
ETFA	0.067442
HNRNPAB	0.0659239
TRIM28	0.0646043
U2AF2	0.0617142
NARS	0.0583165
RPL38	0.05801
TXNL1	0.0577891
DDX52	0.0577155
MCM3	0.0570038
PRKDC	0.0557163
ANXA2	0.052725
EIF3E	0.0516388
KIAA1967	0.0516388
RPS16	0.0483684
FAM158A	0.0476133
DDX3X	0.0470511
RPL26	0.0468403
TUBB6	0.0468403
RAB2A	0.0467199
RPS25	0.0467199
HNRNPC	0.0458037
HSPD1	0.0427583
SFPQ	0.035336
LMNB2	0.0338303
MATR3	0.0317089
CCT5	0.0314805
LMNB1	0.0287571
ELAVL1	0.0277369
EPRS	0.024003
SNRNP200	0.0218011
EEF1G	0.0200214
RPLP1	0.0199747
ALDH3A2	0.0185103
ATP5C1	0.0178372
RPS24	0.0171042
CDK1	0.0166279
MTHFD1	0.0162007
AARS2	0
ABCB10	0
ABCF3	0
ACOT8	0
ACTR2	0
ALDH1B1	0
ANAPC7	0
AP2S1	0
APOBEC3C	0
ASPH	0
ATP13A3	0
ATP4A	0
ATP5E	0
ATP5I	0
ATP6V1G1	0
ATXN2L	0
BAX	0
BAZ1A	0
BCLAF1	0
BIRC2	0
BOP1	0
BUD31	0
BYSL	0
C12orf5	0
C16orf88	0
C19orf43	0
C1orf35	0
C2orf47	0
C9orf72	0
CAMK2D	0
CAMSAP1	0
CCDC97	0
CCT6A	0
CDK2	0
CDK5	0
CENPV	0
CHMP2B	0
CIZ1	0
CLPP	0
COPS8	0
COX15	0
COX17	0
CPOX	0
CRBN	0
CUL4A	0
DDX19B	0
DDX20	0
DDX55	0
DDX56	0
DEGS1	0
DHRS4L1	0
DLG5	0
DRAP1	0
DTYMK	0
DYNLL2	0
EIF6	0
ELP4	0
EPT1	0
ERCC2	0
EXOSC9	0
FAM120A	0
FAM194A	0
FAR1	0
FBXO17	0
FBXO22	0
FGFR1	0
FGFR1OP	0
FH	0
FKBP5	0
FLG2	0
FMR1	0
FTO	0
G6PD	0
GAPVD1	0
GEMIN5	0
GET4	0
GIPC1	0
GPI	0
GSTK1	0
GTF2F1	0
GTF2H2C	0
H2AFY2	0
HEATR6	0
HMGB3	0
HMGN1	0
HNRNPD	0
IER3IP1	0
IGFN1	0
IPO11	0
ISOC1	0
ISYNA1	0
KIF23	0
LANCL1	0
LARP1	0
LCLAT1	0
LDHB	0
LLGL1	0
LOC100508781	0
LSS	0
MAP2K1	0
MAP2K5	0
MAPT	0
MBOAT2	0
MCMBP	0
MEN1	0
MOB1A	0
MORC2	0
MPST	0
MRPL28	0
MRPL38	0
MRPL49	0
MRPS23	0
MSH5	0
MSI1	0
MTHFD2	0
MTX1	0
MYL6	0
NAA15	0
NAA25	0
NBN	0
NCAPG2	0
ND2	0
NDUFA2	0
NDUFA8	0
NDUFS4	0
NDUFS8	0
NDUFV1	0
NEFM	0
NUDT11	0
NUP153	0
NUP50	0
OSBP	0
PAPOLA	0
PDXP	0
PITPNB	0
PKN2	0
PLRG1	0
PNO1	0
POGZ	0
POLD3	0
POLDIP3	0
POLR1C	0
PPAN-P2RY11	0
PRPSAP1	0
RAB12	0
RAB34	0
RAB38	0
RAB3GAP2	0
RAD21	0
RBBP4	0
RBM10	0
RBM22	0
RFC4	0
RFC5	0
RFPL3	0
RHOT2	0
RPL21	0
RPL22	0
RPS10	0
RPS27	0
RPTOR	0
RRAGB	0
RRP15	0
RTCD1	0
SAMHD1	0
SCARB2	0
SCD	0
SEC31A	0
SF3A3	0
SGPP1	0
SHMT2	0
SLC25A10	0
SMC4	0
SNRNP40	0
SNRPD3	0
SNRPF	0
SRPK2	0
SRSF6	0
SRSF7	0
SSBP1	0
STAT1	0
STAT3	0
SYF2	0
SYNGR2	0
SYPL1	0
TAMM41	0
TBC1D15	0
TBRG4	0
TELO2	0
TFB2M	0
THBS1	0
TM9SF3	0
TMCO1	0
TMED5	0
TMEM167A	0
TMEM205	0
TMEM209	0
TMEM85	0
TMEM97	0
TOMM70A	0
TPGS1	0
TPP2	0
TRIM71	0
TRMT112	0
TRMU	0
TST	0
U2SURP	0
UBLCP1	0
UBXN6	0
UCHL5	0
UFL1	0
USP11	0
UTP20	0
VPS13C	0
VPS33A	0
WASF2	0
XKRX	0
XPO5	0
YIPF2	0
YRDC	0
ZADH2	0
ZNF598	0
RPS3	-0.00611666
DDX5	-0.00778371
DDX17	-0.0103267
GNB2L1	-0.0127408
RPN1	-0.01544
C15orf24	-0.0166279
TRAP1	-0.0171584
XPOT	-0.0191704
RAN	-0.0192362
TUFM	-0.0200852
RPL6	-0.023459
COPB1	-0.0248422
HIST1H4J	-0.0264722
RPL7	-0.0271032
DNAJA3	-0.0277369
NSDHL	-0.0282806
RPL13	-0.0316475
DLD	-0.0336118
NONO	-0.0338567
OSBPL8	-0.0361652
SLC25A4	-0.0363365
RARS	-0.0370951
CTPS	-0.0376645
DDX39A	-0.0386665
VRK1	-0.0391384
IGF2BP1	-0.0414258
NOP2	-0.0426567
CSTB	-0.0439433
RPL27A	-0.0439433
[truncated: 903 more rows]

## Sheet: WT to F508+MG132 log2FC
WT to F508+MG132 log2FC
PreyGene	FC
UBB	5.56986
ABCC3	5.49185
NBR1	4.37504
PSMB4	4.31649
PSMB5	4.20945
PSMB3	4.16993
PEX5	4.05528
HMGCR	3.67243
SUN1	3.67243
ATF6	3.55459
H2AFY2	3.55459
PSMB1	3.49185
HERPUD1	3.49185
CBS	3.45943
NME1	3.45943
MYH10	3.45396
PSMA1	3.42146
CCDC99	3.32193
PPP1R15B	3.32193
PSMA3	3.32193
UCHL1	3.24793
COASY	3.23243
KIF5A	3.16993
TAF15	3.16993
MIF	3.16993
EIF5B	3.12928
EIF6	3.12928
MAGED1	3.12928
PSMB7	3.08746
SPAG5	3.08746
LRRC49	3.07772
UBXN8	3.06609
MTR	3.04439
PEX19	3.0276
TPX2	3.00594
FSD1	3
IFT74	3
BUB1B	2.93157
AKAP11	2.92942
CBR1	2.9105
PSMA2	2.85798
RRM2B	2.85798
LPCAT4	2.85798
PFN2	2.81474
MAP1B	2.8147
PJA2	2.80735
PASK	2.80735
RIF1	2.7585
PDZD8	2.75489
SUPT16H	2.75489
ATF6B	2.75489
IPO4	2.75489
SON	2.75489
OAS3	2.75489
IRAK1	2.71958
USP33	2.71958
HSPA4L	2.70044
SERPINB1	2.70044
IBTK	2.70044
BAG5	2.70044
DMD	2.70044
FAM101B	2.64386
TPM3	2.64386
EEF1A2	2.63421
ANKHD1-EIF4EBP3	2.6177
ACBD5	2.61256
SKA2	2.58857
TCHP	2.58496
POLR2B	2.58496
RPA2	2.58496
CRMP1	2.58208
DGKH	2.54555
AARS	2.54432
TUBB4B	2.53456
MTPN	2.52356
IRS2	2.52356
TAB1	2.52356
ATG2B	2.5166
AKAP1	2.48177
WAPAL	2.45943
ADA	2.45943
NDC80	2.45943
SNX14	2.45943
LARP1B	2.45943
RASSF10	2.45943
ACOT2	2.45943
ISYNA1	2.44655
HSPA6	2.40532
TMEM57	2.39438
KIF11	2.39232
ITPR3	2.39232
UBQLN4	2.39232
ADAM17	2.39232
GLTSCR2	2.39232
HECTD2	2.39232
AOX1	2.39232
JMJD1C	2.38943
ZCCHC8	2.37156
HUWE1	2.34978
HAUS5	2.34346
ISOC1	2.34346
RNH1	2.32193
KIF20A	2.32193
MIS18A	2.32193
WDR62	2.32193
RGPD6	2.32193
CSNK1A1L	2.32193
POLR3A	2.32193
ZMYM6NB	2.32193
ERBB3	2.32193
EIF4G3	2.30455
UBE2L3	2.30455
BAG6	2.30014
PTPN13	2.28901
SUGP2	2.26015
C21orf33	2.24793
GRAMD1A	2.24793
UGGT1	2.24793
CUX1	2.24793
RRBP1	2.23243
SLC30A9	2.21435
POLR2A	2.20593
PEX3	2.17354
SNX19	2.16993
UXT	2.16993
EIF4ENIF1	2.16993
PYCR1	2.16993
MKLN1	2.16993
TBL2	2.16993
ADRM1	2.16993
ACSL4	2.16993
RYR2	2.16993
ATP1A3	2.16993
CSTB	2.16861
PSMA6	2.16704
ERC1	2.14712
KEAP1	2.1375
ATP13A1	2.13722
PSMA7	2.12422
ASCC3	2.12246
PSMA5	2.11548
CHD8	2.11214
CSRP2	2.11214
TMX2	2.11214
TTC37	2.11214
UBXN7	2.11214
DPYSL3	2.09268
PRRC2C	2.08746
MAP7D3	2.08746
DHX36	2.08746
YRDC	2.08746
FLNC	2.08746
ATG7	2.08746
2022-09-15	2.08746
CARM1	2.08746
UBXN2A	2.08746
VPS37A	2.08746
IKBKAP	2.08746
KCNJ8	2.08746
TMEM161A	2.08746
ACP1	2.08746
PCNT	2.08746
PFAS	2.06507
PFKL	2.06198
ACOT7	2.06077
ANKRD17	2.05889
FAIM	2.04801
NOP16	2.04801
CCDC104	2.04259
RRP1B	2.01504
TAF7	2
GATAD2B	2
KNTC1	2
MCL1	2
TRABD	2
GLT25D1	2
EN1	2
TOP2B	2
PMPCB	2
GEMIN5	1.98603
PCK2	1.98089
AKAP8L	1.97548
BCLAF1	1.97548
TFIP11	1.9731
GTF3C1	1.96059
GLRX3	1.9542
BRAP	1.9369
UHRF1	1.90895
GTSE1	1.90689
SELS	1.90689
SUGP1	1.90689
2022-03-06	1.90689
TAP2	1.90689
PPP4C	1.90689
GMNN	1.90689
ABCC9	1.90689
FAM53C	1.90689
KIAA0319	1.90689
C6orf72	1.90689
ABTB2	1.90689
ATXN2	1.90401
CHORDC1	1.90401
ENO2	1.90401
TTC28	1.86713
UPF1	1.86713
PEX14	1.86404
BAG2	1.85798
INCENP	1.84511
URI1	1.84511
RBBP4	1.8365
RINT1	1.82406
YTHDC2	1.80735
KIAA1244	1.80735
HAUS1	1.80735
LTV1	1.80735
CCDC85C	1.80735
HAUS4	1.80735
ARMC10	1.80735
PSMD10	1.80735
DBN1	1.80735
ALMS1	1.80735
ZNF318	1.80735
MRPL18	1.80735
BACH1	1.80735
MOV10	1.80735
CBX5	1.80735
PDE8A	1.80735
KIAA0564	1.80735
NUP153	1.79665
DIDO1	1.78371
NUP98	1.78371
USP5	1.77967
MFN2	1.7585
STK3	1.7585
TSG101	1.7585
CDC5L	1.75554
SEC63	1.74719
NEK9	1.74361
PRMT1	1.71958
TCEB1	1.71958
TBK1	1.70918
CPNE1	1.70044
DEGS1	1.70044
PLOD1	1.70044
LANCL1	1.70044
ACADVL	1.70044
LANCL2	1.70044
RAP1B	1.70044
DDX19A	1.70044
RBM27	1.70044
ATXN3	1.70044
LRRFIP1	1.70044
CIRH1A	1.70044
POP7	1.70044
ANP32B	1.70044
CENPV	1.70044
PCM1	1.70044
IFT81	1.70044
DIS3L	1.70044
CPT1B	1.70044
PAIP2	1.70044
CENPH	1.70044
PBK	1.70044
GPRIN1	1.70044
C19orf25	1.67604
CLPB	1.67604
EIF4EBP1	1.67604
EYA4	1.67604
NUP210	1.67604
HPRT1	1.66297
WDR92	1.65247
MKI67	1.6466
TXNDC5	1.64386
YIF1A	1.64386
CYP51A1	1.64158
CEP170	1.62936
MYH9	1.62936
PUF60	1.62593
MLLT11	1.62203
AHCY	1.61607
SLC27A4	1.61607
HSPH1	1.59187
FAR1	1.58857
DDX24	1.58702
TOP1	1.58702
CUEDC2	1.58496
DDB1	1.58496
DGKE	1.58496
PDCD11	1.58496
PTGES3	1.58496
MCMBP	1.58496
POLD2	1.58496
ZNF638	1.58496
MRPL37	1.58496
FAM8A1	1.58496
PPIL1	1.58496
PALLD	1.58496
NME7	1.58496
MIA3	1.58496
PRKCD	1.58496
KDM5C	1.58496
TRIP6	1.58496
NEDD8-MDP1	1.58496
UBE2L6	1.58496
TRIM59	1.58496
ALDH9A1	1.58496
PRPS1L1	1.58496
LGALS4	1.58496
NUP210L	1.58496
RECQL	1.58365
MCTS1	1.58316
BAZ1B	1.56071
EIF3I	1.55794
FARSA	1.55245
CNOT10	1.54432
ERLIN2	1.54432
PPP1CA	1.54006
GMPS	1.53952
SNRNP70	1.53456
USP10	1.53456
C1orf43	1.52949
LMF2	1.52356
PSMC6	1.52356
KIAA0368	1.52136
NOC3L	1.51241
CPSF2	1.50808
MSI1	1.50808
PRRC2A	1.50808
UBL4A	1.50808
TPR	1.50681
TMEM48	1.5045
RAE1	1.5025
CKAP5	1.49825
CCNT1	1.49546
CEP89	1.49546
DNAJA4	1.49546
G6PD	1.49546
KCTD12	1.49546
KIAA0586	1.49546
UBAP2	1.49546
EXOSC7	1.49005
TACC3	1.49005
ATXN2L	1.48177
CALD1	1.47393
GET4	1.45943
NCKAP5L	1.45943
GLE1	1.45943
LIMD1	1.45943
TAF9B	1.45943
METAP2	1.45943
POC5	1.45943
NSA2	1.45943
OSGEP	1.45943
PEX13	1.45943
CPSF4	1.45943
ORMDL1	1.45943
C11orf10	1.45943
ACSF3	1.45943
INTS5	1.45943
TPP2	1.45943
TPGS1	1.44556
BRE	1.44114
CXorf56	1.44114
HDAC2	1.44022
PRR11	1.43008
TWF2	1.43008
NUP107	1.42739
PPIA	1.42673
ISOC2	1.41954
SMPD4	1.40251
C20orf30	1.39593
CAMK2B	1.39593
PARD3	1.39593
PSMB6	1.39593
SLC25A21	1.39593
TMEM106C	1.39593
UBXN6	1.39593
EIF2C2	1.39232
MAP4	1.39232
UBAC2	1.39232
TMEM209	1.37411
LOC101060252	1.36923
RRM2	1.36829
MSH5	1.36463
POLD1	1.36463
YTHDF1	1.36463
ASNS	1.36016
INF2	1.35194
DVL3	1.35021
SMARCE1	1.34761
MAT2A	1.32193
NOL11	1.32193
YIF1B	1.32193
ZNF598	1.32193
ADI1	1.32193
DNAJC18	1.32193
SREBF2	1.32193
ATP7B	1.32193
LZTFL1	1.32193
PDIA4	1.32193
ALG1	1.32193
GNB1	1.32193
BTRC	1.32193
SMTN	1.32193
ALS2CR11	1.32193
PAF1	1.32193
C1orf9	1.32193
TACO1	1.32193
MSH3	1.32193
DLG5	1.32193
CASC5	1.32193
RANBP9	1.32193
HECTD1	1.32193
HIP1	1.32193
METTL13	1.32193
SLU7	1.32193
CEP192	1.32193
E2F6	1.32193
NOM1	1.32193
PEX16	1.32193
C15orf23	1.32193
GHDC	1.32193
HAUS7	1.32193
TBL1Y	1.32193
GAB2	1.32193
MAP1A	1.32193
C11orf84	1.32193
JAG1	1.32193
ZCCHC3	1.32193
ITPR1	1.32193
SQLE	1.32193
GSTM3	1.32193
GCAT	1.32193
HIST3H3	1.32193
NUFIP2	1.31601
VARS	1.31378
C12orf5	1.30323
GLYR1	1.30323
PIGK	1.30323
LARP1	1.30146
CSK	1.29414
KIF23	1.29414
PPP1CB	1.29414
LIG3	1.28901
REEP4	1.28901
RPRD2	1.28901
STK4	1.28901
TBRG4	1.28901
TRIP12	1.28901
WDR26	1.28901
SARS2	1.2854
ELAC2	1.2836
ANKLE2	1.28011
SPG20	1.26448
KPNA3	1.26015
DPYSL5	1.2506
KIF4A	1.24793
QARS	1.24793
RHBDD2	1.24793
FAM98A	1.2391
FLNA	1.2388
DYNC1H1	1.23747
GIGYF2	1.22882
C19orf6	1.22239
ARL2	1.21867
TP53BP2	1.20945
DVL2	1.20511
DPYSL4	1.19709
PARP1	1.18835
RANBP2	1.18442
SQSTM1	1.18381
TUBA1B	1.18049
ADSL	1.17354
ATG4B	1.17354
CCDC94	1.17354
CETN2	1.17354
DENR	1.17354
MKI67IP	1.17354
NAA16	1.17354
TRMT112	1.17354
VPS26A	1.17354
DLGAP5	1.17199
DBNL	1.17137
SEC23IP	1.17137
FXR1	1.17104
ERGIC2	1.16993
EXD2	1.16993
FMR1	1.16993
RBM17	1.16993
STAU1	1.16993
UPF3B	1.16993
TTLL12	1.16993
C1orf35	1.16993
YLPM1	1.16993
BIRC6	1.16993
RTF1	1.16993
RIOK1	1.16993
SUMO1	1.16993
KIF1B	1.16993
PLXNB2	1.16993
ANAPC5	1.16993
ZWINT	1.16993
ADCY3	1.16993
PPP6R1	1.16993
C16orf58	1.16993
RNF40	1.16993
PIN1	1.16993
ARID4B	1.16993
ATP13A2	1.16993
SLIRP	1.16993
PTPN23	1.16993
VPS28	1.16993
MLL	1.16993
RRP1	1.16993
CGRRF1	1.16993
SNF8	1.16993
ANAPC16	1.16993
RPP25L	1.16993
KIAA0664	1.16993
MAT2B	1.16993
CAMSAP1	1.16993
MAZ	1.16993
SLC6A18	1.16993
POLR1A	1.16993
CEP63	1.16993
USP30	1.16993
MRPL43	1.16993
BNC2	1.16993
ASCC1	1.16993
CRYBG3	1.16993
ADAM8	1.16993
SYNE2	1.16993
INTS12	1.16993
AGPAT5	1.16993
AMFR	1.16993
GPS1	1.16993
UBAC1	1.16993
AATF	1.16993
CEP97	1.16993
RIOK2	1.16993
OSBPL3	1.16993
C1orf177	1.16993
TNFRSF18	1.16993
RABEP1	1.16812
KDM1A	1.16704
RALY	1.16704
SRRM2	1.16704
WRNIP1	1.16704
NUP214	1.15381
ABCD3	1.15016
PRKDC	1.14451
MAGED2	1.12928
ACAT1	1.12686
TSNAX	1.12422
USP15	1.12246
BUB3	1.11548
STIM1	1.11161
TOP2A	1.11093
PIGU	1.10943
CSTF2T	1.10672
AAAS	1.10434
ARHGEF2	1.10434
DDX23	1.1016
FBXO22	1.1016
NCAPD2	1.1016
PHF21B	1.1016
SART1	1.1016
IARS	1.0972
DIMT1	1.09509
ERLIN1	1.09509
HSPA1B	1.09423
GART	1.08896
GLUD1	1.08746
PKMYT1	1.08746
TTK	1.08746
RBM14	1.08314
UBE2O	1.08161
FAF2	1.07973
EXOSC2	1.07772
PSMA4	1.07183
CRNKL1	1.06751
EXOSC3	1.06751
TRPM7	1.06751
HM13	1.06077
DYNLT1	1.05889
RHOT2	1.05889
SNRPF	1.05889
SRSF2	1.05889
SUCLA2	1.05889
PYCR2	1.05556
SF3B2	1.05389
ALDH3A2	1.05158
NUDCD3	1.04836
ARFGAP2	1.04801
C2orf29	1.04801
COPS2	1.04801
DNAAF2	1.04801
EHMT2	1.04801
FTO	1.04801
GNG12	1.04801
LARS2	1.04801
MRPL22	1.04801
MRPS7	1.04801
N4BP2	1.04801
NUDT1	1.04801
RBM25	1.04801
ZFR	1.04801
USP11	1.0453
STRAP	1.04475
EXOSC4	1.04259
SMAP1	1.04259
CLMN	1.03562
TFCP2	1.03308
MAPKAPK2	1.0276
NUP88	1.0276
POLR1C	1.0276
RDH11	1.0276
USP9X	1.0276
HSPA9	1.02498
RPL28	1.0245
SKA3	1.0245
EIF2AK3	1.02021
PSMB2	1.02021
GTF3C3	1.01937
DCTN1	1.01497
LRWD1	1.01492
SIN3B	1.01381
NUP133	1.00735
MGEA5	1.00627
ATP2A2	1.00328
AASDHPPT	1
ACLY	1
CDKN2A	1
CHCHD3	1
CISD1	1
COG2	1
DNAJC16	1
NAA10	1
PSIP1	1
RAVER1	1
TUBB3	1
YWHAZ	1
RRP7A	1
DUSP3	1
SPTLC2	1
GTPBP2	1
STRN3	1
OFD1	1
PLCG1	1
EGLN1	1
SPANXA1	1
FAM160A2	1
PPP6R2	1
C6orf120	1
KATNB1	1
HSPA14	1
GSR	1
CSTF1	1
TMEM131	1
DCTN4	1
MRPS14	1
GGCX	1
TNRC6B	1
HMMR	1
KRI1	1
FAM120A	1
NGLY1	1
QRICH1	1
TMX4	1
CNOT3	1
C10orf88	1
CEP85	1
KIF20B	1
OGT	1
ATP2C1	1
FAM54A	1
NSL1	1
RRP15	1
MRPL11	1
FBXW11	1
TRMT5	1
UBE2C	1
CEP44	1
C14orf49	1
UTP6	1
FGF14	1
KIAA0101	1
DNMT1	1
CYB5R1	1
TXLNG	1
COX17	1
RAP1GAP2	1
KIAA1430	1
IFT20	1
KATNA1	1
CEBPZ	1
KIAA0100	1
TRAF3IP1	1
CRB1	1
MAD2L1BP	1
ZC3HC1	1
LATS1	1
KIF14	1
APRT	1
GMFB	1
LRRIQ3	1
P2RX4	1
ZMYND8	1
MTUS1	1
MAP3K10	1
DHRS4	1
COBL	1
SLC35E2B	1
USP24	1
ATP4A	1
SNRPA	1
RAD51	1
GNE	1
ASXL1	1
TEX2	1
TRMT1	1
NUDT16L1	1
TMEM208	1
MAP7D1	1
MGA	1
PPP1R13B	1
PPAT	1
C7orf46	1
PEPD	1
TTC30B	1
RAD23A	1
BUB1	1
TARS2	1
LIN9	1
PM20D2	1
GPR125	1
RBM10	1
TIMM23B	1
ASCC2	1
CLSTN3	1
ACACB	0.997016
EIF4A2	0.982201
WDR5	0.975478
HEATR1	0.973096
EWSR1	0.964918
UBE2G2	0.964918
CBX3	0.963474
PIH1D1	0.963474
PSMC1	0.96145
C17orf49	0.960592
CPSF1	0.960592
GNAI2	0.960592
LARP7	0.960592
NOL6	0.960592
PTCD3	0.960592
RACGAP1	0.960592
BCAS2	0.954196
STUB1	0.95316
LMAN1	0.949896
ANAPC1	0.949595
DCTPP1	0.949595
ZC3H4	0.949595
FLNB	0.948645
HNRNPC	0.944357
EIF3CL	0.943416
SERBP1	0.942515
MTA1	0.938599
RAB34	0.938599
GSPT1	0.931575
EPRS	0.930894
PSMC5	0.930824
UFD1L	0.928107
MYO6	0.924362
NUDC	0.923995
PSMC2	0.917989
MTHFD1L	0.917538
ARHGEF7	0.910502
BMS1	0.910502
BRIP1	0.910502
COPS6	0.910502
CTR9	0.910502
DCP1B	0.910502
GBF1	0.910502
HSPE1-MOB4	0.910502
KIAA0020	0.910502
MGMT	0.910502
MRPS2	0.910502
NPC1	0.910502
PMF1	0.910502
PRMT3	0.910502
PURB	0.910502
TRIM56	0.910502
ZDBF2	0.910502
CLASP1	0.906891
KIF1A	0.906891
MRPS5	0.906891
PPP6C	0.906891
SMCHD1	0.906891
YWHAB	0.906891
CCNB1	0.90586
TBL3	0.90586
HNRNPUL2	0.905088
KIAA1967	0.896409
EEF1D	0.893085
DDX18	0.892383
PRDX1	0.892017
PCMT1	0.890771
HNRNPL	0.886954
BNIP1	0.885633
LARP4B	0.885633
TRIM13	0.884523
NOSIP	0.879107
ERH	0.874469
FTSJ3	0.874469
ZC3H11A	0.874469
DPCD	0.867133
MAD2L1	0.867133
SEH1L	0.867133
CHD4	0.863498
RPAP3	0.859473
BCCIP	0.857981
HLA-C	0.857981
TACC1	0.854166
LETM1	0.84944
PRMT5	0.84944
XIAP	0.84944
EPS15	0.847997
SRPK1	0.847997
VEZT	0.847997
BAZ1A	0.845114
DCAKD	0.845114
EIF4E	0.845114
NUSAP1	0.845114
RBM26	0.845114
RDBP	0.845114
RELA	0.845114
RPS6KA1	0.845114
WDR45	0.845114
WLS	0.845114
SKP1	0.840685
DUT	0.839829
EPPK1	0.838164
VCPIP1	0.837943
PTBP1	0.837906
RPRD1B	0.836501
TXN	0.833792
FNDC3A	0.83289
EFHD1	0.831088
MTAP	0.831088
HNRNPA3	0.830075
EIF4G1	0.827163
RCC1	0.82466
HIST1H4J	0.820393
HSPA4	0.819761
HNRNPK	0.812914
UBA1	0.811426
CHERP	0.807355
CHTOP	0.807355
DNTTIP2	0.807355
EIF3G	0.807355
ESPL1	0.807355
GFM1	0.807355
HBS1L	0.807355
PPM1G	0.807355
RANBP3	0.807355
SNAP47	0.807355
U2SURP	0.807355
UTP18	0.807355
ZC3H15	0.807355
2022-03-05	0.807355
PDE3B	0.807355
DNAH6	0.807355
LUZP1	0.807355
DVL1	0.807355
GJC1	0.807355
BRCC3	0.807355
CARS2	0.807355
LSM14B	0.807355
SIKE1	0.807355
WRAP73	0.807355
LPPR2	0.807355
LOC100652741	0.807355
CIAO1	0.807355
CWC22	0.807355
SUDS3	0.807355
SYNJ2	0.807355
PPPDE1	0.807355
NSMCE1	0.807355
KIAA1671	0.807355
RABL5	0.807355
ZNF768	0.807355
UTP14A	0.807355
KCNQ5	0.807355
IWS1	0.807355
THADA	0.807355
GPSM1	0.807355
MAP7	0.807355
CNOT2	0.807355
ANKRD46	0.807355
NAV1	0.807355
COG5	0.807355
PPP2R3A	0.807355
NOX5	0.807355
RPS19BP1	0.807355
UBE2A	0.807355
RBM11	0.807355
BANF1	0.807355
CCNB2	0.807355
HMGB3	0.807355
LRFN1	0.807355
LIMD2	0.807355
ARV1	0.807355
MXRA5	0.807355
PER1	0.807355
STRN	0.807355
TCF20	0.807355
DHX38	0.807355
HLTF	0.807355
FAM188A	0.807355
SLC27A3	0.807355
BTN3A1	0.807355
ARHGEF11	0.807355
HERC3	0.807355
MRPS24	0.807355
SIGLEC5	0.807355
TCTEX1D1	0.807355
SPTBN5	0.807355
N4BP1	0.807355
HINT3	0.807355
DDX59	0.807355
GPR111	0.807355
ZFAND5	0.807355
JMY	0.807355
CCAR1	0.807355
RING1	0.807355
PPM1L	0.807355
TMEM135	0.807355
RBFOX2	0.807355
CENPF	0.807355
BLM	0.807355
DDR1	0.807355
NRBP1	0.807355
POLR3D	0.807355
MOB4	0.807355
C5orf15	0.807355
LOC101060345	0.807355
ITGB6	0.807355
CNO	0.807355
FASTKD5	0.807355
STXBP4	0.807355
TAB2	0.807355
MDN1	0.807355
GNB1L	0.807355
ACO2	0.807355
COMMD3	0.807355
RFX1	0.807355
SPHKAP	0.807355
MEF2BNB-MEF2B	0.807355
AGXT2L1	0.807355
EIF1B	0.807355
FAM208B	0.807355
OIP5	0.807355
ACY1	0.807355
FAM192A	0.807355
NUF2	0.807355
NUP43	0.807355
GGCT	0.807355
THUMPD1	0.807355
TBC1D9B	0.807355
LAMA1	0.807355
SHC4	0.807355
BIN3	0.807355
TYW1	0.807355
CCDC25	0.807355
TMEM39A	0.807355
SKIV2L2	0.803865
HSPA1L	0.800551
ADCY9	0.798742
ATP6V0C	0.797226
ILF3	0.796087
TMOD3	0.792524
ILF2	0.788496
BRD4	0.78804
C17orf81	0.78804
LSM12	0.78804
PRKAA2	0.78804
TMEM38B	0.78804
CAPZA1	0.785495
LONP1	0.784271
RPS27	0.780979
CBX1	0.77967
GPX4	0.77967
POLR2H	0.77967
KTN1	0.776577
ST7	0.776577
SLC9A1	0.774574
TMEM199	0.77259
RPL18	0.764711
C19orf43	0.758499
C19orf52	0.758499
CDC27	0.758499
GRIP1	0.758499
HMGB1	0.758499
LTN1	0.758499
PDCD2L	0.758499
PPIL3	0.758499
PRPF3	0.758499
TAPT1	0.758499
WASH1	0.758499
ZWILCH	0.758499
FAM49B	0.754888
PFDN2	0.754888
AURKB	0.753085
RPS6	0.750939
PGRMC1	0.750022
HAUS6	0.747234
RBMX	0.747234
SMARCA5	0.744161
ARL3	0.743614
POLD3	0.743614
HNRNPR	0.741949
HYOU1	0.739129
MBD3	0.736966
GFPT1	0.730774
RNPS1	0.730774
PCCA	0.728089
HNRNPM	0.727168
DNAJB6	0.723909
RPS26	0.723043
RPL5	0.722827
WDR36	0.722466
FLAD1	0.719584
OSBPL6	0.719584
PANK4	0.719584
PDLIM7	0.719584
PLAA	0.719584
SASS6	0.719584
VPS13C	0.719584
NAP1L4	0.714246
ANLN	0.709182
BID	0.709182
SNRNP40	0.709182
STOM	0.709182
MCCC2	0.707728
RPS21	0.706105
PRPF40A	0.70463
RPL11	0.70463
CLCN7	0.70044
MLH1	0.70044
SRSF9	0.70044
GTF2I	0.695346
TBC1D15	0.694207
PSMD1	0.693374
RPS28	0.692988
EIF1	0.686561
EXOSC5	0.686561
LSM5	0.686561
OTUB1	0.686561
SAFB	0.686561
UQCRC1	0.686561
ACTA1	0.684498
THRAP3	0.683468
EXOSC10	0.680776
DPYSL2	0.68012
HNRNPH1	0.675579
NAE1	0.670623
SAP18	0.670623
TRA2B	0.670623
KHSRP	0.666757
SYNCRIP	0.665883
TMEM165	0.662965
PRPF8	0.657112
CAMK2D	0.656795
GAK	0.656795
SAFB2	0.656795
SRP19	0.656795
UBE2I	0.656795
CAPZB	0.652077
TEX264	0.652077
JPH1	0.647782
C22orf28	0.647715
HNRNPH2	0.644777
C1orf198	0.643856
RPS23	0.643856
USE1	0.643856
MARS	0.643146
RAB3GAP1	0.64052
DCAF7	0.634558
DDX6	0.626783
FKBP4	0.62284
ELAVL1	0.622058
NOP2	0.619865
SGPL1	0.61804
TRAP1	0.611348
AGPAT9	0.611013
PSMD2	0.609332
RPS15A	0.608809
FASN	0.608232
EFTUD2	0.602665
NCL	0.600904
APOOL	0.588574
CFDP1	0.588574
CLTA	0.588574
CLU	0.588574
CNOT8	0.588574
COMT	0.588574
DHX35	0.588574
EI24	0.588574
FHOD1	0.588574
GNL3L	0.588574
IGF1R	0.588574
MRPS23	0.588574
NGDN	0.588574
PHKA1	0.588574
RFC3	0.588574
RPS27L	0.588574
SPATA5	0.588574
UBIAD1	0.588574
UCK2	0.588574
WDR81	0.588574
NEDD1	0.587025
PUM1	0.587025
SCD	0.587025
SNAPIN	0.587025
CSNK1D	0.586406
GNPAT	0.586406
RBM15	0.586406
NUP50	0.586073
YWHAH	0.585864
NAT10	0.58524
PRDX3	0.585211
ACAA2	0.584963
AHCTF1	0.584963
ALDOA	0.584963
C11orf58	0.584963
C15orf63	0.584963
CDK11A	0.584963
DNAJC1	0.584963
FAU	0.584963
GRB2	0.584963
HAT1	0.584963
LIN7C	0.584963
MLF2	0.584963
NUP155	0.584963
NUPL1	0.584963
PLRG1	0.584963
RCC2	0.584963
RCOR1	0.584963
SF3B4	0.584963
SGTA	0.584963
SRSF10	0.584963
SHCBP1	0.584963
ITPR2	0.584963
PPP3CB	0.584963
SNTB1	0.584963
LRG1	0.584963
XRCC1	0.584963
C20orf43	0.584963
SLC2A8	0.584963
SCOC	0.584963
CETN3	0.584963
TIMM17A	0.584963
SLTM	0.584963
VPS18	0.584963
TTI2	0.584963
GMDS	0.584963
MPHOSPH9	0.584963
ATP6V1D	0.584963
TMCO7	0.584963
REXO4	0.584963
COMMD6	0.584963
TNFRSF10D	0.584963
NOL10	0.584963
ALG9	0.584963
ATP5D	0.584963
NUS1	0.584963
ALG11	0.584963
LRIG2	0.584963
ITIH3	0.584963
NCSTN	0.584963
XK	0.584963
LRRC41	0.584963
RB1	0.584963
APC	0.584963
JMJD6	0.584963
CALCOCO2	0.584963
LOC100294033	0.584963
HMGCL	0.584963
FASLG	0.584963
AAGAB	0.584963
ACVR2B	0.584963
BCAT1	0.584963
POLR2L	0.584963
TRIM33	0.584963
MKRN2	0.584963
C18orf1	0.584963
YBX2	0.584963
CBLB	0.584963
C8orf42	0.584963
SUCLG1	0.584963
TTC16	0.584963
HMGXB4	0.584963
HAGH	0.584963
NACA2	0.584963
PGK2	0.584963
LOC389831	0.584963
UBE2E2	0.584963
DTNBP1	0.584963
MARCO	0.584963
TRRAP	0.584963
HTT	0.584963
FKBP15	0.584963
STK31	0.584963
LAMA2	0.584963
LCN10	0.584963
CNTLN	0.584963
PAPOLB	0.584963
C12orf26	0.584963
FAM83H	0.584963
FOS	0.584963
MAG	0.584963
TP53BP1	0.584963
CHAD	0.584963
ARMC6	0.584963
DNAH3	0.584963
AATK	0.584963
ZNF644	0.584963
CYP20A1	0.584963
FMNL1	0.584963
LOC646862	0.584963
LTBP2	0.584963
C10orf28	0.584963
IVL	0.584963
PXDNL	0.584963
UBR7	0.584963
SEC62	0.584963
POLI	0.584963
SAMD1	0.584963
MAPK8IP3	0.584963
SLC26A11	0.584963
SMAD2	0.584963
KIF26B	0.584963
CEP152	0.584963
PIK3R2	0.584963
NAGK	0.584963
LOC100508781	0.584963
POLR2I	0.584963
SYMPK	0.584963
M6PR	0.584963
CRTC1	0.584963
GPX1	0.584963
DGCR14	0.584963
GCFC1	0.584963
NKX2-1	0.584963
TLE3	0.584963
TRIM4	0.584963
ABCA13	0.584963
ZNF536	0.584963
IQCB1	0.584963
SESN2	0.584963
IKBKB	0.584963
TRMT11	0.584963
RFC1	0.584963
ANXA1	0.584963
SORBS1	0.584963
SPATS2	0.584963
AMOTL1	0.584963
TBKBP1	0.584963
KIAA0391	0.584963
CDKN2AIPNL	0.584963
OR5M10	0.584963
RBX1	0.584963
LCOR	0.584963
WFS1	0.584963
CENPM	0.584963
FAM96B	0.584963
TMC7	0.584963
PRRC2B	0.584963
COL5A1	0.584963
FAM186A	0.584963
TRIM10	0.584963
DCHS2	0.584963
DGKZ	0.584963
SYNGR2	0.584963
RBM33	0.584963
PLEKHG1	0.584963
ZC2HC1C	0.584963
PIK3C2A	0.584963
ZNF300	0.584963
MRPS17	0.584963
TRIL	0.584963
TDRD6	0.584963
LILRB5	0.584963
KIF2C	0.584963
IAH1	0.584963
RAB32	0.584963
HIST2H2AA4	0.584963
NEFL	0.584963
MFF	0.584963
OBSL1	0.584963
RPL36A	0.584963
ADCY6	0.584963
COPS8	0.584963
ARRB2	0.584963
REEP2	0.584963
AQP8	0.584963
ZNF281	0.584963
GOT2	0.584963
CHRNA5	0.584963
IRF2BP1	0.584963
PPAN-P2RY11	0.584963
SH3RF1	0.584963
HSD17B8	0.584963
RBM5	0.584963
RBM34	0.584963
MRPL20	0.584963
RNF185	0.584963
MEF2D	0.584963
LRRK2	0.584963
CASS4	0.584963
PHLDB2	0.584963
FAM188B	0.584963
PIK3C2B	0.584963
VARS2	0.584963
MAFG	0.584963
EPS8L2	0.584963
SPOCK2	0.584963
C3	0.584963
POLK	0.584963
LIMCH1	0.584963
HDAC8	0.584963
NME3	0.584963
MBD5	0.584963
MYOD1	0.584963
EIF1AY	0.584963
C14orf166B	0.584963
ACPP	0.584963
C7orf72	0.584963
CAMK1	0.584963
KCNG1	0.584963
FNDC3B	0.584963
NOP14	0.584963
PCDHGA12	0.584963
MAPK3	0.584963
PAN3	0.584963
FNIP1	0.584963
CWC15	0.584963
FAT2	0.584963
LOC101060683	0.584963
ZMAT5	0.584963
MYO1H	0.584963
DOHH	0.584963
FZD5	0.584963
PIM3	0.584963
DDX21	0.584835
HCFC1	0.584656
HNRNPA0	0.584611
HAX1	0.584335
ALDH7A1	0.583932
PLK1	0.583932
TRMT1L	0.583932
C16orf80	0.583652
SRSF1	0.583652
USMG5	0.583652
ATP13A3	0.58316
DIABLO	0.58316
IK	0.58316
JUN	0.58316
KDM3B	0.58316
ZNF207	0.58316
BOP1	0.58208
COPS7A	0.58208
MOB1A	0.58208
MPP5	0.58208
MRS2	0.58208
NOL9	0.58208
PFDN1	0.58208
RAPGEF6	0.58208
RBM14-RBM4	0.58208
SIN3A	0.58208
SMARCC2	0.58208
SNX5	0.58208
TBC1D5	0.58208
PKM2	0.581369
HDLBP	0.572251
SMC3	0.569226
RPL23A	0.568147
PYGB	0.563792
CTTN	0.562373
HIST1H1C	0.560056
RPL19	0.559483
RPS20	0.557995
GNB2L1	0.556393
HN1L	0.554589
UBAP2L	0.553567
DDX50	0.552627
PABPC4	0.552452
PLS3	0.550197
MCCC1	0.549539
CDC37	0.548797
SNRNP200	0.545434
ASS1	0.543537
MKL2	0.541373
C1QBP	0.53952
AIMP1	0.531465
LUC7L2	0.531465
PAICS	0.529195
SPCS2	0.528379
GAPVD1	0.527824
HNRNPU	0.52756
IRS4	0.525256
SAP30BP	0.518504
ACTR2	0.516537
DKC1	0.516537
XPO7	0.507719
USP7	0.50527
YWHAE	0.504305
DOCK7	0.5025
SBDS	0.5025
RANGAP1	0.498806
RPL27	0.498678
CAD	0.495151
RPS4X	0.495151
RRP12	0.492755
ATP2B1	0.491596
ZNF74	0.490051
ALDH1B1	0.487038
COG3	0.483739
PDCL	0.483739
ADSS	0.48011
BET1L	0.48011
C17orf61	0.48011
COMMD4	0.48011
DYNLL2	0.48011
EXOSC6	0.48011
MRPL24	0.48011
ROS1	0.48011
SPCS1	0.48011
SPTLC1	0.48011
SMARCA4	0.477017
G3BP1	0.474567
GPATCH1	0.468931
PCCB	0.468373
RPL10	0.465938
ABCC4	0.459432
ACTL6A	0.459432
CDC123	0.459432
DNAJC2	0.459432
DSTN	0.459432
H1FX	0.459432
KIAA1715	0.459432
RPL24	0.459432
SET	0.459432
SMNDC1	0.459432
SPAG9	0.459432
SRSF4	0.459432
TXNDC12	0.459432
MSH6	0.454405
NDUFS1	0.454405
GRWD1	0.453091
PDHA1	0.453091
CPSF6	0.450848
GBAS	0.450848
FKBP8	0.450548
EIF5A	0.449775
FIP1L1	0.446148
UBQLN2	0.446148
IMPDH2	0.44518
PSMD13	0.444436
SMC4	0.443845
RPL15	0.439458
LRPPRC	0.437952
DHX15	0.434937
LARP4	0.434403
RAC1	0.434403
CDKAL1	0.432737
ALYREF	0.432547
COPE	0.432238
MAVS	0.432238
BRMS1L	0.430077
CCDC168	0.430077
CDCA8	0.430077
CORO7-PAM16	0.430077
CYTB	0.430077
FLYWCH2	0.430077
IRF2BP2	0.430077
MNF1	0.430077
MRPL40	0.430077
MRPS22	0.430077
MYO1D	0.430077
NEDD4	0.430077
OSBP2	0.430077
PNISR	0.430077
SIPA1L2	0.430077
SORD	0.430077
TOMM70A	0.430077
TXLNA	0.430077
WDR18	0.430077
RAB1B	0.429988
EEF1B2	0.428661
NUP62	0.42582
ACTN4	0.421979
TCOF1	0.421979
EDC3	0.420434
FKBP3	0.420434
UBR4	0.418325
DNM1L	0.41684
BCL2L2-PABPN1	0.415038
CECR5	0.415038
GOSR2	0.415038
RAP2C	0.415038
TPT1	0.415038
TTF2	0.415038
TUFM	0.415038
UBE2S	0.415038
SSRP1	0.411589
CHMP7	0.409195
TUBGCP2	0.409195
SFPQ	0.406305
ATP6AP2	0.40439
RPL3	0.403722
IGF2BP1	0.400538
XRN1	0.399931
IGF2BP2	0.39689
AGPAT2	0.395929
ASPSCR1	0.395929
CRBN	0.395929
CSDA	0.395929
FAM83G	0.395929
PGLS	0.395929
PML	0.395929
PRKCSH	0.395929
RBM7	0.395929
RNF2	0.395929
STARD3NL	0.395929
TARBP1	0.395929
TOP3A	0.395929
TRIM26	0.395929
UBE3A	0.395929
WDR70	0.395929
PSMD12	0.395301
HNRNPUL1	0.393219
RPS8	0.392481
MTA2	0.392317
RBBP7	0.392317
SEC13	0.392317
TRNT1	0.392317
ALDH2	0.390515
CSNK2B	0.390515
HMGA1	0.390515
SNRPC	0.390515
RPLP2	0.389209
PSPC1	0.383761
HNRNPD	0.383642
EIF3D	0.382702
SF3A3	0.382189
HSP90B1	0.378512
WDR82	0.372147
EEF1G	0.369621
PFKM	0.369234
DHX30	0.367083
CDS2	0.364633
DHX29	0.364633
FSCN1	0.364633
INA	0.364633
NKRF	0.364633
RIC8A	0.364633
EIF3E	0.364572
PEF1	0.36154
PGAM5	0.36154
RPS25	0.357552
SEC24C	0.357552
RPSA	0.356342
CLCC1	0.355905
STX18	0.355905
RPL7A	0.354901
DRG2	0.354632
PRKAR2B	0.354632
RPS3	0.354184
LARS	0.353748
CDK1	0.352719
PFDN5	0.351995
LENG8	0.351941
SNRPG	0.351941
FANCI	0.350858
XRN2	0.350497
NONO	0.350033
DYNLRB1	0.349776
NASP	0.345587
ADNP	0.345065
COPS4	0.345065
EDC4	0.3434
HSPA5	0.33931
COPS3	0.337794
DDRGK1	0.333901
NXF1	0.332712
CACYBP	0.329484
ZBTB33	0.328054
AGPAT6	0.321928
ARPC3	0.321928
C20orf4	0.321928
DDX20	0.321928
DHX8	0.321928
EIF4E2	0.321928
LUC7L	0.321928
MRPS11	0.321928
NDUFV1	0.321928
NUDCD2	0.321928
PPIL4	0.321928
RCN2	0.321928
REPS1	0.321928
ST13	0.321928
TMED9	0.321928
TSN	0.321928
YY1	0.321928
MYH14	0.321928
FAM21C	0.321928
YTHDF3	0.321928
KIRREL2	0.321928
ANKRD52	0.321928
ADGB	0.321928
LOC100131608	0.321928
NT5DC2	0.321928
SLC35G1	0.321928
ZNF384	0.321928
ZNF626	0.321928
FAM107B	0.321928
PSPN	0.321928
NME4	0.321928
ZCWPW2	0.321928
C12orf45	0.321928
PEG10	0.321928
PIAS2	0.321928
DFFA	0.321928
FBXO30	0.321928
ANKRD13C	0.321928
NIT1	0.321928
RPA4	0.321928
DRAP1	0.321928
HSPG2	0.321928
VPS13D	0.321928
CEP290	0.321928
CASP7	0.321928
ACVR1C	0.321928
CEP164	0.321928
CXorf26	0.321928
BAG4	0.321928
SERPINB11	0.321928
TMBIM6	0.321928
BCOR	0.321928
AP4E1	0.321928
PVRL1	0.321928
PAN2	0.321928
LMX1B	0.321928
EIF2AK4	0.321928
CLCN5	0.321928
DNA2	0.321928
PSMG1	0.321928
AKAP2	0.321928
TRAPPC2L	0.321928
AHDC1	0.321928
GCH1	0.321928
POU6F2	0.321928
CCDC37	0.321928
RASGEF1C	0.321928
MTRF1	0.321928
PPCS	0.321928
ZC3H3	0.321928
USP34	0.321928
PLEKHG3	0.321928
PNMA2	0.321928
SMC6	0.321928
GPR126	0.321928
EGR1	0.321928
SP1	0.321928
C6orf106	0.321928
MS4A5	0.321928
AFF3	0.321928
CCDC69	0.321928
C9orf9	0.321928
IZUMO2	0.321928
PSMD5	0.321928
TBC1D9	0.321928
C10orf118	0.321928
CR1	0.321928
RPAP1	0.321928
COPS7B	0.321928
XYLT2	0.321928
PLXNA3	0.321928
MAGEB3	0.321928
IQCK	0.321928
PDE4DIP	0.321928
LYPLA1	0.321928
NRP1	0.321928
CTSH	0.321928
FRK	0.321928
ARSH	0.321928
HYDIN	0.321928
CREB3L1	0.321928
C20orf11	0.321928
PIKFYVE	0.321928
CHRND	0.321928
CA11	0.321928
TMEM132C	0.321928
SSC5D	0.321928
USP49	0.321928
ACBD7	0.321928
C16orf71	0.321928
PAX2	0.321928
NPRL3	0.321928
ANKRD26	0.321928
KSR1	0.321928
PVR	0.321928
CDK5RAP2	0.321928
MFSD6L	0.321928
WBP4	0.321928
IPCEF1	0.321928
NEO1	0.321928
MAGEA11	0.321928
WDR65	0.321928
CNTROB	0.321928
USH1C	0.321928
FAT1	0.321928
C9orf125	0.321928
COQ6	0.321928
NRG1	0.321928
GKN2	0.321928
GUCY1B3	0.321928
HLA-DRB3	0.321928
DNAH5	0.321928
SPG11	0.321928
DEFB104B	0.321928
RHCG	0.321928
C12orf56	0.321928
ODZ3	0.321928
MYO5C	0.321928
CPNE6	0.321928
TPM4	0.321928
BCKDK	0.321928
COQ5	0.321928
LLPH	0.321928
ELMO2	0.321928
MIB1	0.321928
DUSP14	0.321928
EXOC6	0.321928
CYP11A1	0.321928
SLC22A23	0.321928
PTER	0.321928
POFUT1	0.321928
SENP1	0.321928
GALNT8	0.321928
IKBKG	0.321928
BAX	0.321928
KIAA2013	0.321928
C1orf174	0.321928
C1orf27	0.321928
ZNF295	0.321928
TMEM30A	0.321928
SLC25A25	0.321928
WHSC2	0.321928
MYO19	0.321928
SPEN	0.321928
SRPK2	0.321928
MARCKSL1	0.321928
GAMT	0.321928
C1orf122	0.321928
CARHSP1	0.321928
PPP1R3F	0.321928
SMPD2	0.321928
SCAF1	0.321928
PPP1R9B	0.321928
CHEK2	0.321928
COG6	0.321928
B3GNT7	0.321928
C1orf65	0.321928
TBC1D20	0.321928
SERINC1	0.321928
FAM207A	0.321928
MAP2K4	0.321928
WWP1	0.321928
USP47	0.321928
PLA2G2F	0.321928
SHROOM2	0.321928
GDI1	0.321928
SLC16A10	0.321928
CHPF2	0.321928
TRIM27	0.321928
ISCA1	0.321928
PTGIS	0.321928
GJA1	0.321928
FADS1	0.321928
FAM190B	0.321928
QPCT	0.321928
FCGBP	0.321928
OR11L1	0.321928
TRANK1	0.321928
KRAS	0.321928
SAA2-SAA4	0.321928
ZNF284	0.321928
DOPEY1	0.321928
ZNF354B	0.321928
NDUFS5	0.321928
DCD	0.321928
CCRL2	0.321928
TRIM32	0.321928
C12orf51	0.321928
SNX25	0.321928
THBS1	0.321928
MRPL38	0.321928
NKTR	0.321928
SHC1	0.321928
GNB5	0.321928
ZNF682	0.321928
GIGYF1	0.321928
ZIC5	0.321928
CNTN2	0.321928
PDIA5	0.321928
NPHS1	0.321928
JPH2	0.321928
FGFR1OP2	0.321928
TTC5	0.321928
DCDC2	0.321928
CYBRD1	0.321928
STARD13	0.321928
FDPS	0.321928
ERMAP	0.321928
LOC101060651	0.321928
NCKIPSD	0.321928
NADKD1	0.321928
LOC100653058	0.321928
VEGFB	0.321928
KDM3A	0.321928
SLC39A11	0.321928
NT5C2	0.321928
TYW1B	0.321928
IP6K1	0.321928
LRFN2	0.321928
RUNDC1	0.321928
IREB2	0.321928
COL19A1	0.321928
QTRTD1	0.321928
ARHGAP33	0.321928
CYTH1	0.321928
PRPF18	0.321928
CACNA1B	0.321928
C15orf2	0.321928
SNX29	0.321928
GAD2	0.321928
IFT140	0.321928
FBXO45	0.321928
TRPC6	0.321928
RNPEPL1	0.321928
LPPR4	0.321928
IFLTD1	0.321928
OR6S1	0.321928
LOC100653113	0.321928
CEP57L1	0.321928
MFSD1	0.321928
ZNF665	0.321928
PDGFC	0.321928
PMP2	0.321928
GOLGA3	0.321928
LOC100996290	0.321928
KHNYN	0.321928
TPSG1	0.321928
SHPRH	0.321928
PTCHD4	0.321928
CAPN11	0.321928
EML3	0.321928
RFX6	0.321928
KIAA0922	0.321928
SLC22A3	0.321928
MAP4K3	0.321928
TRPV3	0.321928
TADA3	0.321928
IDH1	0.321928
POTEI	0.321928
ABCB11	0.321928
CDK9	0.321928
RDH14	0.321928
C1orf86	0.321928
TDRKH	0.321928
PRAMEF15	0.321928
POM121C	0.321928
MUL1	0.321928
GKAP1	0.321928
AGAP8	0.321928
CREBBP	0.321928
IFIT2	0.321928
NUBPL	0.321928
RPS6KC1	0.321928
SYT9	0.321928
PCSK5	0.321928
OBSCN	0.321928
LCN9	0.321928
PRPF38A	0.321928
UBE2J2	0.321928
CLIC4	0.321928
MFN1	0.321928
SETD1A	0.321928
LRCH1	0.321928
PAFAH1B1	0.321928
DCAF8	0.321928
KIF15	0.321928
MMAB	0.321928
CALU	0.321928
DICER1	0.321928
DEF6	0.321928
PNPT1	0.321928
PPHLN1	0.321928
TTC17	0.321928
C6orf195	0.321928
RABIF	0.321928
TGFBI	0.321928
RHBDD3	0.321928
E2F5	0.321928
BBX	0.321928
HGD	0.321928
FLT1	0.321928
PCDH12	0.321928
C4orf27	0.321928
PHYHIPL	0.321928
ACSM5	0.321928
GIT1	0.321928
WDR33	0.321928
BAK1	0.321928
TRAPPC1	0.321928
ATPAF1	0.321928
CEP78	0.321928
ARAP1	0.321928
FNBP4	0.321928
GPHN	0.321928
TRIP4	0.321928
CACNB4	0.321928
SPIRE1	0.321928
FAM96A	0.321928
ND5	0.321928
ACSM1	0.321928
FAM49A	0.321928
TSHZ2	0.321928
MRPL45	0.321928
GP5	0.321928
IQGAP3	0.321928
NR3C1	0.321928
KCNJ11	0.321928
PHF2	0.321928
MFSD2A	0.321928
RNF5	0.321928
RUFY3	0.321928
GGT7	0.321928
COIL	0.321928
MYOM2	0.321928
GLUL	0.321928
C5orf34	0.321928
TARSL2	0.321928
SECISBP2	0.321928
DLC1	0.321928
NUFIP1	0.321928
ZFYVE9	0.321928
C3orf19	0.321928
NECAP1	0.321928
SNAPC1	0.321928
OXA1L	0.321928
GFRA1	0.321928
ASB6	0.321928
GFRAL	0.321928
HBXIP	0.321928
PRRT3	0.321928
WDR34	0.321928
PKHD1	0.321928
FANCB	0.321928
ATP4B	0.321928
ABL1	0.321928
NEMF	0.321928
FN3KRP	0.321928
C15orf44	0.321928
CTRB1	0.321928
RAB40C	0.321928
GRIA3	0.321928
TCP11L1	0.321928
FAM179B	0.321928
CGN	0.321928
TMEM132D	0.321928
CAMTA2	0.321928
C3orf38	0.321928
NFYA	0.321928
DSN1	0.321928
NEK4	0.321928
AK8	0.321928
PITPNM1	0.321928
DONSON	0.321928
LOH12CR1	0.321928
SCGB1D1	0.321928
NTN4	0.321928
MYEOV2	0.321928
MORN1	0.321928
KIN	0.321928
NEK10	0.321928
[truncated: 2,693 more rows]

## Sheet: F508+MG132 to Ork+MG132 log2FC
F508+MG132 to Ork+MG132 log2FC
PreyGene	Fold Change
TUBA1C	5.70044
ACACA	3.97796
ACTA2	3.52356
HIST2H2AB	3.24793
PPP1CC	3.18982
RAB2B	3.04439
RAB1A	2.85798
AK2	2.66297
PABPN1	2.52356
PAPOLA	2.49185
PRDX4	2.39232
ITGA5	2.32193
PGK1	2.32193
PTPRG	2.32193
NHP2L1	2.24793
SCAMP1	2.20163
PUS7	2.08746
ALG9	2.05889
PITPNB	2.05889
CDV3	2
NUDCD2	1.926
TDRKH	1.926
NDUFA8	1.90689
MORF4L2	1.90689
EIF3C	1.90689
HNRNPAB	1.89812
TMED10	1.87447
HDGF	1.848
WDR77	1.80735
PSMF1	1.80735
SFXN4	1.80735
ACOT1	1.7885
VAT1	1.7885
UFM1	1.77761
PGAM1	1.76553
STX8	1.76553
CCDC50	1.75489
RCN1	1.75489
COPS8	1.73697
RAB8A	1.71621
BET1	1.7137
ANXA11	1.70044
TARS2	1.70044
CTPS2	1.70044
OCLN	1.70044
ATP6	1.70044
UBP1	1.70044
FAM177A1	1.67807
MTMR6	1.67807
MTFP1	1.66297
NAA15	1.66297
ANO6	1.65711
LSM14A	1.63743
LCP1	1.62619
ATP6V1E1	1.58496
LPP	1.58496
SLC25A10	1.58496
SUB1	1.58496
AHCYL1	1.58496
MORF4L1	1.58496
FAM134B	1.58496
RBPJ	1.58496
SMARCC1	1.58496
RBM12	1.58496
CAMK2G	1.58496
AASS	1.58496
LRRC57	1.58496
ATIC	1.58496
GDPD1	1.58496
PLEKHG5	1.58496
SREK1	1.58496
RBM4	1.58496
TYW1	1.51457
DYNC1LI2	1.5025
ADI1	1.48543
CALU	1.48543
GLRX5	1.48543
MAPK1IP1L	1.48543
TOMM34	1.48543
URB1	1.48543
SPCS3	1.46566
RAB4A	1.45943
EML4	1.45943
LRRC1	1.45943
ACTR3	1.45943
AURKA	1.45943
CKS2	1.45943
ITPA	1.45943
SPAG1	1.45943
FTSJD2	1.45943
SRSF12	1.45943
AGPAT3	1.45943
HLA-B	1.45943
TUBA3D	1.45943
SRRM2	1.45066
AUP1	1.43741
ARFGAP3	1.42884
ABHD12	1.41504
TFAM	1.41504
DNAJB11	1.38702
BAX	1.37851
CKAP2	1.37851
MTX3	1.37851
NMD3	1.37851
TAF4	1.37851
CCDC25	1.36257
CAPRIN1	1.35364
PTRH2	1.34792
VBP1	1.34395
FAM213A	1.32193
SNCA	1.32193
TM9SF3	1.32193
AGFG1	1.32193
FH	1.32193
HRAS	1.32193
RPF2	1.32193
NDUFS8	1.32193
KRR1	1.32193
MRPL55	1.32193
GNA11	1.32193
C11orf67	1.32193
OR8S1	1.32193
SNAPC4	1.32193
ENTPD3	1.32193
ERP44	1.32193
ECHS1	1.32193
FYN	1.32193
NDUFB4	1.32193
ZFAND6	1.32193
LETMD1	1.32193
ZNF225	1.32193
TMEM48	1.31647
MTCH2	1.29956
C1orf27	1.26303
LOC101059922	1.26303
MMAB	1.26303
TM9SF4	1.26303
NOC2L	1.24793
TMEM201	1.24793
AIP	1.24101
KDSR	1.24101
PRDX5	1.23563
PCNA	1.23266
AAGAB	1.22239
CCDC124	1.22239
HMGB1	1.22239
NDUFAF2	1.22239
SORD	1.22239
MCAM	1.20163
APEX1	1.19265
MARCKS	1.19265
PDE3B	1.19265
SMAP2	1.19265
UFSP2	1.19265
LPCAT3	1.18442
RAB9A	1.18442
GSR	1.16993
PEX3	1.16993
RCOR1	1.16993
AHCYL2	1.16993
APOB	1.16993
IZUMO4	1.16993
CD63	1.16993
TMEM173	1.16993
EFHA1	1.16993
ORC4	1.16993
MRFAP1	1.16993
TTC4	1.16993
WDR73	1.16993
SLFN14	1.16993
PXN	1.16993
PPIL2	1.16993
C20orf27	1.16993
CREB3L2	1.16993
VKORC1L1	1.16993
DDHD2	1.16993
PDLIM1	1.15754
EDF1	1.152
CDC73	1.1375
GNB1	1.1375
LYPLAL1	1.1375
MYH14	1.1375
NDUFB9	1.1375
PDIA3	1.1375
PDLIM3	1.1375
PFDN4	1.1375
PHF6	1.1375
PRPF38B	1.1375
PTER	1.1375
TBC1D20	1.1375
HLA-A	1.13124
MAPK3	1.11548
PPAN-P2RY11	1.11548
RRAGB	1.11548
SRM	1.11548
ACADVL	1.10692
CEPT1	1.08746
CSTF3	1.08746
GTF3C4	1.08746
SNAP23	1.08746
UBIAD1	1.08746
RAE1	1.08246
CTNNA1	1.078
HN1	1.078
DNAJC18	1.07039
PACSIN2	1.07039
MRPL12	1.06413
PROSC	1.06413
TSR1	1.06413
EIF4E	1.05889
TARS	1.05445
CHP	1.04439
BCAP31	1.03395
ATG9A	1
BCAT1	1
C21orf59	1
CYB5R1	1
FAM114A2	1
GORASP2	1
GOSR1	1
GPHN	1
IAH1	1
JAGN1	1
LSM14B	1
MACF1	1
NUBP1	1
NUP35	1
PGLS	1
POLRMT	1
PPA2	1
PPAT	1
PTPLB	1
RAB7A	1
SLC25A22	1
SPTLC1	1
STX12	1
TYMS	1
PSMD9	1
TMCO1	1
MAP4K4	1
RNF20	1
ARID1A	1
INPP5F	1
AIG1	1
FAM162A	1
PSMC3IP	1
MOCS2	1
ERO1L	1
ACTR10	1
GSTO1	1
SWAP70	1
MED20	1
HTRA2	1
SELRC1	1
STAT5B	1
MAN1A2	1
CYB5R4	1
C1orf212	1
CARS	1
PRKCA	1
MPP2	1
MUT	1
MZT2B	1
NIPA1	1
IL18R1	1
IQUB	1
IL1RAP	1
PREP	1
VSIG8	1
RAB31	1
CPPED1	1
CMC1	1
TRUB1	1
PITRM1	1
FAM115A	1
ELAVL2	1
LAGE3	1
ENSA	1
SLC7A2	1
AKR7A2	1
HEG1	1
TMEM41A	1
CANT1	1
DPF2	1
CTCFL	1
SLC6A15	0.973033
C1orf198	0.970854
SOAT1	0.963474
CDC42	0.95818
VMP1	0.949374
CLCN7	0.943416
RTN4	0.941583
FTO	0.932886
2022-03-02	0.925999
RAB5B	0.925999
SMG9	0.925999
C19orf43	0.917538
DIS3	0.917538
H2AFZ	0.917538
NDUFS3	0.917538
TXLNA	0.917538
OCIAD1	0.910733
USE1	0.910733
ARL8A	0.906891
FAR1	0.906891
VRK1	0.906891
EIF1	0.900464
RAB11B	0.900464
RPLP1	0.899071
SRSF7	0.89812
AGPAT9	0.89503
CCNB2	0.893085
GCDH	0.893085
PPM1L	0.893085
ZFAND5	0.893085
PLS3	0.890376
CDCA3	0.887525
AHCY	0.883186
COPB2	0.878694
DPY30	0.874469
FARP1	0.874469
GNA13	0.874469
LAS1L	0.874469
MAPRE1	0.874469
SLTM	0.874469
TMED5	0.874469
EHD4	0.862496
STK38	0.862496
TXNDC12	0.862496
ADAM17	0.85561
LUC7L3	0.85561
UBE2I	0.85561
ARPC4	0.847997
ASPH	0.847997
ATP5F1	0.847997
C1orf122	0.847997
CHMP2B	0.847997
DFFA	0.847997
FECH	0.847997
GAD2	0.847997
HBXIP	0.847997
ND2	0.847997
PGP	0.847997
PHF2	0.847997
QTRTD1	0.847997
RNASEH2C	0.847997
SLC25A17	0.847997
SLC39A14	0.847997
SP1	0.847997
SUMO3	0.847997
TES	0.847997
UQCRC1	0.847997
C20orf30	0.836501
TOP1	0.836501
CDCA8	0.830075
CHMP5	0.830075
CORO7-PAM16	0.830075
DCTPP1	0.830075
DNAJC1	0.830075
AGPAT6	0.824913
ACSL3	0.814444
RRM2	0.809115
COMT	0.807355
DUSP3	0.807355
GGCX	0.807355
GTF2F2	0.807355
JUN	0.807355
TCHP	0.807355
ETFB	0.807355
CDK4	0.807355
FGR	0.807355
ELP3	0.807355
ATL2	0.807355
GOPC	0.807355
SLC12A6	0.807355
TRAM1	0.807355
ZADH2	0.807355
TPD52L1	0.807355
C10orf35	0.807355
INPP5K	0.807355
GOLGA7	0.807355
TBPL1	0.807355
HSD17B11	0.807355
PRRC1	0.807355
RPRD1A	0.807355
EIF2B4	0.807355
FAM195B	0.807355
CCDC101	0.807355
CEP104	0.807355
RECQL5	0.807355
RBMS3	0.807355
WDR12	0.807355
SREBF1	0.807355
CKS1B	0.807355
TOE1	0.807355
CNTN4	0.807355
BIRC5	0.807355
BRD2	0.807355
ARL13B	0.807355
UBE2V1	0.807355
SNX17	0.807355
TMEM237	0.807355
GRAMD4	0.807355
SC5DL	0.807355
MEA1	0.807355
ORMDL3	0.807355
TMEM59	0.807355
HIVEP1	0.807355
SYNRG	0.807355
CAPN12	0.807355
ZNF462	0.807355
FMO3	0.807355
CCDC28A	0.807355
C12orf57	0.807355
NRBF2	0.807355
UFC1	0.807355
HK2	0.807355
SHMT1	0.807355
ACAP2	0.807355
THOC6	0.807355
CCDC86	0.807355
C7orf50	0.807355
BPNT1	0.807355
LOC101060541	0.807355
TXNDC9	0.807355
TMEM56	0.807355
DNAJC12	0.807355
PSEN1	0.807355
VTN	0.807355
ART3	0.807355
MRPL49	0.807355
COL4A1	0.807355
BTN2A2	0.807355
HERC2	0.807355
DCTN5	0.807355
ZNF239	0.807355
PSAT1	0.807355
PRPF39	0.807355
HSPE1	0.807355
TRMT2A	0.807355
MRPL47	0.807355
CCNI2	0.807355
PTPRO	0.807355
PRKG1	0.807355
NDUFA11	0.807355
METTL11A	0.807355
PDAP1	0.796467
RHOA	0.796467
ARHGDIA	0.793549
SACM1L	0.793549
ATXN2L	0.792195
CDC123	0.788496
H1FX	0.788496
SAR1B	0.785875
COX4I1	0.784271
HIST1H2BB	0.781926
ACO2	0.777608
CSDA	0.777608
MGST2	0.777608
MXRA7	0.777608
ATP6V1F	0.765535
NCK1	0.765535
PAF1	0.765535
RAP1A	0.765535
TOLLIP	0.765535
STOML2	0.764512
VAPB	0.76275
SEC61G	0.758992
ACLY	0.754888
EIF2A	0.754888
NUP54	0.754888
PTPN11	0.754888
RPL31	0.75336
HPRT1	0.752072
SCIN	0.752072
HDAC1	0.748461
FARSB	0.744743
ANXA1	0.736966
ATG3	0.736966
BLVRA	0.736966
CMAS	0.736966
EFNB1	0.736966
G6PD	0.736966
GRB2	0.736966
HARS	0.736966
HIST1H2BD	0.736966
LMCD1	0.736966
NANP	0.736966
NCBP1	0.736966
PAK2	0.736966
PLD3	0.736966
PPIL1	0.736966
PPP3CB	0.736966
PPP6C	0.736966
PRR11	0.736966
PRUNE	0.736966
SCP2	0.736966
TMEM43	0.736966
WDR18	0.736966
SLC1A5	0.733213
DDRGK1	0.732188
BAG3	0.729352
ANXA2	0.725378
GPR89A	0.720846
NME1-NME2	0.720846
C15orf38-AP3S2	0.719892
PPP2R5D	0.719892
HMOX2	0.7176
ALDH2	0.716207
CALM2	0.716207
DHRS7	0.713696
PSME1	0.713696
BASP1	0.710493
SNRPE	0.710493
RRS1	0.706269
ISOC1	0.704544
ANO10	0.70044
CYB5A	0.70044
EIF4H	0.70044
METTL7A	0.70044
PRPF4B	0.70044
PSIP1	0.70044
SPRY4	0.70044
TK1	0.70044
CRK	0.696165
EFHD2	0.685891
PRDX2	0.682428
EIF5	0.681824
BAG4	0.678072
C1orf43	0.678072
CARHSP1	0.678072
CIAPIN1	0.678072
DNAJB14	0.678072
DTYMK	0.678072
EIF3H	0.678072
ERMP1	0.678072
FADS1	0.678072
FAM190B	0.678072
FBXO17	0.678072
FHL1	0.678072
GEMIN7	0.678072
INTS7	0.678072
KHDRBS3	0.678072
KIF1A	0.678072
LYPLA1	0.678072
NAT14	0.678072
NT5C3	0.678072
PPP1R9B	0.678072
RBM28	0.678072
RHBDD3	0.678072
RPA3	0.678072
RRP8	0.678072
SEC23B	0.678072
SIRT2	0.678072
SMCHD1	0.678072
SPEN	0.678072
SREBF2	0.678072
TMCC3	0.678072
TRIM9	0.678072
UBA3	0.678072
YTHDF3	0.678072
ISOC2	0.676386
PREB	0.671377
KIF22	0.662965
MIF	0.662965
MKI67IP	0.662965
PGRMC1	0.660911
HSPBP1	0.658963
ARHGAP1	0.657112
YKT6	0.655554
FUS	0.655089
ACTR2	0.652077
ANKRD46	0.652077
CYB5B	0.652077
NUP43	0.652077
PCK2	0.652077
RAD23B	0.652077
RBFOX2	0.652077
RING1	0.652077
TTC1	0.652077
NPM1	0.649093
DNAJB1	0.63743
KIF1B	0.63743
OSBPL2	0.63743
PIN1	0.63743
TAPT1	0.63743
RRM2B	0.633872
SLC27A2	0.633872
FGFR1OP	0.632268
GNG12	0.628031
ARL6IP5	0.626185
XIAP	0.624491
RPLP2	0.623233
CORO1B	0.622299
CENPV	0.621488
CLIC1	0.621488
DDX19A	0.621488
ILVBL	0.621488
KIFC1	0.621488
ROS1	0.621488
SSRP1	0.621488
HNRNPR	0.617752
DBNL	0.616671
LPGAT1	0.616671
NPM3	0.616671
DYNLRB1	0.612977
RPL4	0.606658
CSRP2	0.605721
LBR	0.598509
2022-09-09	0.597902
HSD17B10	0.596935
ARCN1	0.592122
ABCC5	0.584963
ACAA2	0.584963
ACAD9	0.584963
ARMC6	0.584963
ATP5H	0.584963
CC2D1A	0.584963
CDS2	0.584963
CMTM8	0.584963
CTNNBL1	0.584963
DCTN4	0.584963
DDX55	0.584963
DHRS13	0.584963
DLAT	0.584963
DNMT1	0.584963
DOHH	0.584963
KIF2C	0.584963
MCMBP	0.584963
MRTO4	0.584963
NME7	0.584963
PFDN1	0.584963
PM20D2	0.584963
PRMT1	0.584963
PRRC2B	0.584963
RAB23	0.584963
RRP7A	0.584963
SGTA	0.584963
SMARCC2	0.584963
SNRPD2	0.584963
SUCLG1	0.584963
THRAP3	0.584963
TMEM209	0.584963
TMX3	0.584963
TSN	0.584963
TXLNG	0.584963
UBA1	0.584963
UCHL1	0.584963
UCHL5	0.584963
UQCRB	0.584963
RAB33B	0.584963
CLASP2	0.584963
SRSF5	0.584963
MIOS	0.584963
VWA3B	0.584963
STX17	0.584963
TBX6	0.584963
ZAK	0.584963
ACP2	0.584963
ATG13	0.584963
FAM73A	0.584963
CYP2C19	0.584963
LIN7A	0.584963
SDF2L1	0.584963
SYNGR3	0.584963
GLOD4	0.584963
CDC42EP1	0.584963
MCTP1	0.584963
PDK3	0.584963
PTPN9	0.584963
RETSAT	0.584963
TREML2	0.584963
CEP41	0.584963
SPAG7	0.584963
MRPS25	0.584963
PIK3R4	0.584963
ZNF514	0.584963
RNF121	0.584963
TUBGCP4	0.584963
FKBP1A	0.584963
C11orf54	0.584963
MEPCE	0.584963
POLR2M	0.584963
SCARB1	0.584963
MAP1S	0.584963
MPP7	0.584963
C9orf114	0.584963
CPA5	0.584963
LIMS1	0.584963
ASUN	0.584963
POMT1	0.584963
THRA	0.584963
TMC4	0.584963
PHF5A	0.584963
EIF3J	0.584963
NFYC	0.584963
PRMT10	0.584963
HMOX1	0.584963
TULP3	0.584963
VPS4A	0.584963
KIF3A	0.584963
SRSF6	0.584963
PEA15	0.584963
PDCD10	0.584963
KDELR2	0.584963
CCDC51	0.584963
FAM63A	0.584963
TAF6	0.584963
PPP3R1	0.584963
POLR1D	0.584963
CIZ1	0.584963
FAM208A	0.584963
KIRREL	0.584963
ERICH1	0.584963
CCS	0.584963
SpyCatcher03	0.584963
CWC27	0.584963
EPCAM	0.584963
KDM2B	0.584963
NLE1	0.584963
SLC25A24	0.584963
ATP5J	0.584963
NHSL1	0.584963
PTGES2	0.584963
FAM71E2	0.584963
CALML5	0.584963
CDHR2	0.584963
GUCY1A2	0.584963
SDK1	0.584963
ATG4A	0.584963
USP4	0.584963
NDE1	0.584963
MLX	0.584963
OXTR	0.584963
SORBS3	0.584963
SYPL1	0.584963
MRPL53	0.584963
AGAP7	0.584963
YTHDC1	0.584963
HELQ	0.584963
FBXO46	0.584963
PTPRU	0.584963
DDX51	0.584963
PELP1	0.584963
NLRX1	0.584963
SLC35B4	0.584963
FITM2	0.584963
ADAM10	0.584963
FAM75D1	0.584963
CORO1A	0.584963
CXXC1	0.584963
SNX8	0.584963
TMTC2	0.584963
PSKH2	0.584963
IMP4	0.584963
2022-09-14	0.584963
RPS10-NUDT3	0.584963
ALG8	0.584963
UBE2T	0.584963
DNAJC17	0.584963
DAK	0.584963
BLOC1S2	0.584963
MYCBP2	0.584963
LOC100132705	0.584963
ALOX5AP	0.584963
PITPNM2	0.584963
LOC101060231	0.584963
C8orf38	0.584963
MYO5A	0.584963
CNOT6	0.584963
NPAS2	0.584963
EIF4B	0.569366
VAMP3	0.568284
RPN2	0.567229
ECI1	0.567041
FKBP3	0.565597
VCL	0.565597
FARSA	0.56242
EMD	0.562191
GRAMD1A	0.559427
PRPF4	0.559427
SLC6A8	0.559427
ETF1	0.557482
EIF4EBP1	0.556393
MCTS1	0.554589
VMA21	0.553936
TMPO	0.553833
ARPC3	0.552541
SAFB	0.552541
SUGT1	0.552541
UBE4A	0.552541
TMEM199	0.549339
LRRC59	0.547488
PTCD3	0.547488
TIMM13	0.547488
RAB18	0.543142
ANKLE2	0.541894
ILF3	0.540568
PEX13	0.540568
PPP6R3	0.540568
SRSF4	0.540568
PLIN3	0.536053
TXNL1	0.535332
BSG	0.534336
CXorf56	0.534336
YWHAQ	0.532874
ELOVL5	0.530515
HSPA4	0.530515
LNPEP	0.530515
NECAP2	0.530515
TJP1	0.530515
HSPB1	0.527247
RPS3A	0.527247
RPS17	0.524267
BRI3BP	0.523562
LIMA1	0.523562
UBE2J1	0.521953
PPIA	0.521427
ARF6	0.520832
MTPN	0.520832
SYAP1	0.516791
birA	0.514869
AP3S1	0.514573
BRIX1	0.514573
BTN3A1	0.514573
CNNM3	0.514573
COX7A2	0.514573
CSNK2A2	0.514573
GJC1	0.514573
LSR	0.514573
PIN4	0.514573
POGZ	0.514573
PRIM2	0.514573
PRPS2	0.514573
PUS1	0.514573
SLC25A21	0.514573
TMED2	0.514573
TOM1L1	0.514573
PCMT1	0.512951
TUBB4B	0.511899
CBR1	0.510962
EWSR1	0.509014
EIF2B1	0.50696
RBBP4	0.50696
SLC33A1	0.505235
ACAT1	0.503766
UBXN8	0.503766
CERS2	0.5025
CHMP4B	0.5025
DENR	0.5025
DHX29	0.5025
RBM26	0.5025
RPS6KA3	0.5025
SLC25A1	0.5025
TH1L	0.5025
TRIP6	0.5025
WLS	0.5025
SNAP29	0.499571
ACP1	0.4975
SEC63	0.4975
VAMP2	0.494765
ENO1	0.494494
NPLOC4	0.491536
CYP51A1	0.490635
ACSS1	0.485427
ACVR1C	0.485427
ALG1	0.485427
C14orf142	0.485427
C1orf86	0.485427
CEP290	0.485427
CHCHD2	0.485427
CLK3	0.485427
DAZAP1	0.485427
DUSP14	0.485427
ELMO2	0.485427
GFM2	0.485427
GSTM3	0.485427
IKBIP	0.485427
MYO5C	0.485427
NCS1	0.485427
NDUFS7	0.485427
NDUFV1	0.485427
NR2C2	0.485427
NUDT4	0.485427
OTUB1	0.485427
PCID2	0.485427
PPCS	0.485427
PPP1R2	0.485427
PSMG3	0.485427
PTBP3	0.485427
QKI	0.485427
RABL3	0.485427
RANBP1	0.485427
RPL14	0.485427
SLC25A6	0.485427
SNX27	0.485427
SRC	0.485427
STX6	0.485427
SYNM	0.485427
TADA3	0.485427
TBC1D10B	0.485427
TBC1D5	0.485427
TMEM147	0.485427
TMOD3	0.485427
TPM4	0.485427
UBE2K	0.485427
UBFD1	0.485427
ZC3H18	0.485427
POR	0.481869
SEC22B	0.478654
NUP98	0.476438
HNRNPH3	0.472068
PDLIM5	0.471306
PFN1	0.467126
SRP19	0.465664
RHEB	0.463947
SCFD1	0.463947
SEC23A	0.463947
CSTF1	0.459432
DHX16	0.459432
HSPA14	0.459432
RBM10	0.459432
RRP15	0.459432
SLC35G2	0.459432
SLC7A5	0.459432
TMX1	0.459432
ZW10	0.459432
ABCF1	0.456378
MOSPD2	0.456378
PUF60	0.455679
C20orf3	0.452512
SSBP1	0.452512
UBL4A	0.452512
CAPZA1	0.450393
CORO1C	0.449803
ABRACL	0.447459
CPSF4	0.447459
FLAD1	0.447459
MMGT1	0.447459
ORMDL1	0.447459
RHOG	0.447459
HNRNPF	0.443919
ADAR	0.443607
SHMT2	0.443607
TRIM13	0.442943
CDKAL1	0.442518
SND1	0.43995
NUDT21	0.438121
C19orf25	0.436099
LENG8	0.436099
PIP5K1A	0.436099
SSR3	0.436099
TAGLN2	0.435281
LMAN1	0.432441
RAB34	0.430634
SERPINB1	0.428843
ATP5L	0.427421
CNP	0.427421
UFD1L	0.42553
ABCE1	0.424498
HN1L	0.422691
UBXN4	0.418226
ACPP	0.415038
ATP5D	0.415038
ATP6V1D	0.415038
BCLAF1	0.415038
C8orf42	0.415038
CDKN2AIPNL	0.415038
COMMD8	0.415038
CWC15	0.415038
DARS2	0.415038
DDI2	0.415038
DEK	0.415038
DLGAP5	0.415038
EIF5A	0.415038
EXOSC9	0.415038
FAM134C	0.415038
FAM158A	0.415038
FAM50A	0.415038
FLYWCH2	0.415038
FNDC3B	0.415038
GBA2	0.415038
GCFC1	0.415038
ITPRIP	0.415038
MDH2	0.415038
OSBPL11	0.415038
PLS1	0.415038
POLR2L	0.415038
PRPF3	0.415038
PTGES3	0.415038
RCN2	0.415038
RDBP	0.415038
RPL32	0.415038
SFXN2	0.415038
SLC35E1	0.415038
SMEK1	0.415038
STXBP3	0.415038
SUPT5H	0.415038
TFCP2	0.415038
TLE3	0.415038
TMC7	0.415038
TOMM70A	0.415038
TTC16	0.415038
UBAC1	0.415038
VTA1	0.415038
DPYSL4	0.408085
RPS12	0.408085
TTC35	0.406506
DARS	0.402098
LMNB2	0.402098
ESYT2	0.401363
C20orf4	0.400538
EDC3	0.400538
EXOSC10	0.399607
CSTB	0.398549
SLC30A6	0.398549
LMNB1	0.397336
RDH11	0.395929
SMN2	0.395929
PDIA6	0.393481
RPLP0	0.393011
NMT1	0.391768
CISD2	0.389947
FAM91A1	0.389042
ATXN3	0.387023
CPT1B	0.387023
EXOSC6	0.387023
TMEM97	0.387023
KHSRP	0.386355
AGPAT1	0.378512
BMS1	0.378512
BTF3L4	0.378512
EMG1	0.378512
FXR2	0.378512
GHDC	0.378512
MRPS11	0.378512
PLEKHA1	0.378512
PRMT3	0.378512
RTN3	0.378512
SLC2A1	0.378512
TBCB	0.378512
KIAA1274	0.377235
CACYBP	0.376854
TEX264	0.373458
RAB11FIP1	0.371969
TRA2B	0.371969
CAP1	0.369234
PGAM5	0.369234
RPL27A	0.369234
SF3B14	0.369234
CAPN2	0.36257
CTSB	0.36257
FAM208B	0.36257
GGA1	0.36257
GNB1L	0.36257
GPSM1	0.36257
LSM2	0.36257
STRN4	0.36257
TBCE	0.36257
TMEM135	0.36257
TRAPPC3	0.36257
UBE2A	0.36257
UBE3A	0.36257
PRDX1	0.361739
PTPLAD1	0.359184
ACTG1	0.358631
ALDH3A2	0.356694
POLR2E	0.356144
SNRPF	0.356144
LPCAT1	0.353637
DNAAF2	0.347923
DNAJC10	0.347923
LDHB	0.347923
OSGEP	0.347923
RASSF10	0.347923
WASF2	0.347923
TUBB	0.347247
TIPRL	0.345775
NUP155	0.343954
UBE2G2	0.343954
C1QBP	0.342555
GANAB	0.341037
MAPK1	0.341037
HNRNPA3	0.33985
AP3M1	0.338802
CSNK2A1	0.337035
PEX19	0.337035
HNRNPA2B1	0.334419
TMEM38B	0.334419
CLCC1	0.331844
LOC101060252	0.331206
ACOT7	0.330917
NUDC	0.330149
SEC24B	0.330149
ELAVL1	0.329308
PIH1D1	0.329308
AAAS	0.328623
RAB14	0.328623
EPS15L1	0.327575
VRK2	0.32681
SFXN1	0.325875
CAMK1D	0.321928
CEBPZ	0.321928
COX17	0.321928
ECSIT	0.321928
EGLN1	0.321928
GGA3	0.321928
HSP90B1	0.321928
LETM1	0.321928
MRPS23	0.321928
NGDN	0.321928
PEPD	0.321928
PRDX6	0.321928
PRPSAP2	0.321928
SAR1A	0.321928
SNRPB2	0.321928
UBE2C	0.321928
VPS13A	0.321928
MTA3	0.321928
GNAI1	0.321928
KIF5C	0.321928
HERC5	0.321928
RAB25	0.321928
MMP16	0.321928
TAF1D	0.321928
KIAA1109	0.321928
ZNF268	0.321928
RNF170	0.321928
ZC3H7A	0.321928
MPHOSPH10	0.321928
ERCC3	0.321928
SLC41A3	0.321928
CTNNB1	0.321928
SFT2D2	0.321928
SENP6	0.321928
CYP4X1	0.321928
PAWR	0.321928
CHCHD4	0.321928
SV2A	0.321928
RNASEH2A	0.321928
ITGA6	0.321928
MTPAP	0.321928
STK11IP	0.321928
LOC100287477	0.321928
UBE3D	0.321928
ANKMY2	0.321928
WDR75	0.321928
C1orf31	0.321928
ANAPC10	0.321928
KLHL15	0.321928
LOX	0.321928
PHKB	0.321928
TSC22D3	0.321928
C3orf78	0.321928
ACSL1	0.321928
WDR52	0.321928
PPID	0.321928
DUSP12	0.321928
LMTK2	0.321928
CCL21	0.321928
TP53I11	0.321928
MIS12	0.321928
ITGA1	0.321928
ARPC1A	0.321928
JUND	0.321928
FANCM	0.321928
OTUD5	0.321928
GRPEL1	0.321928
GALNT2	0.321928
PHKG2	0.321928
EXOSC1	0.321928
TRAPPC6B	0.321928
VTI1B	0.321928
PPWD1	0.321928
MED23	0.321928
KIFAP3	0.321928
RAD18	0.321928
PCDHB16	0.321928
IGSF1	0.321928
TEP1	0.321928
TMCO4	0.321928
ATP8B3	0.321928
LOC101060092	0.321928
RGS22	0.321928
FAM179A	0.321928
ATF3	0.321928
SSU72	0.321928
ANK2	0.321928
MYO1F	0.321928
MOB3A	0.321928
ABCB8	0.321928
CDH9	0.321928
NT5DC1	0.321928
OTUD7B	0.321928
CBFA2T3	0.321928
MCAT	0.321928
ADAM30	0.321928
UBE3B	0.321928
HEATR8	0.321928
WDFY3	0.321928
BNIP3	0.321928
ERN2	0.321928
PPP1R15A	0.321928
RNF150	0.321928
PQBP1	0.321928
BPTF	0.321928
TULP4	0.321928
STX4	0.321928
NIPBL	0.321928
EPN2	0.321928
MYBL2	0.321928
MUC4	0.321928
DUS1L	0.321928
BBS2	0.321928
STRA8	0.321928
PRX	0.321928
LRRC66	0.321928
NDUFB11	0.321928
CD72	0.321928
CBL	0.321928
MAP1LC3B	0.321928
ZNF215	0.321928
GLCE	0.321928
SRRM4	0.321928
ADAM9	0.321928
ERG	0.321928
MYH6	0.321928
PPFIBP1	0.321928
HAL	0.321928
TMA16	0.321928
NAA30	0.321928
C7orf43	0.321928
TMCO2	0.321928
BDP1	0.321928
OR4F29	0.321928
SOBP	0.321928
FAM189B	0.321928
CDH18	0.321928
RGS9BP	0.321928
LGR6	0.321928
ZFHX2	0.321928
KLHL26	0.321928
KBTBD11	0.321928
MYH11	0.321928
RAB12	0.321928
MAPRE3	0.321928
BAZ2A	0.321928
SMG1	0.321928
CBFB	0.321928
TMEM222	0.321928
FNTA	0.321928
ZNF335	0.321928
RTTN	0.321928
CCDC87	0.321928
KCNG3	0.321928
GAS7	0.321928
SUZ12	0.321928
TSC1	0.321928
EFCAB6	0.321928
PHF15	0.321928
TYR	0.321928
TMEM211	0.321928
NTHL1	0.321928
USP8	0.321928
MRPL46	0.321928
GPR180	0.321928
C19orf54	0.321928
SLC12A7	0.321928
TRMT6	0.321928
TNIP1	0.321928
OTUD6B	0.321928
SMU1	0.321928
IMP3	0.321928
ULK3	0.321928
SYT11	0.321928
RBPJL	0.321928
TMED7-TICAM2	0.321928
SUPT6H	0.321928
BOLA1	0.321928
YIPF6	0.321928
THSD1	0.321928
TXNDC15	0.321928
FNBP1	0.321928
IVNS1ABP	0.321928
SDAD1	0.321928
RRAS2	0.321928
NFXL1	0.321928
MCM10	0.321928
SCAP	0.321928
ATRN	0.321928
LAMTOR2	0.321928
DNAAF1	0.321928
RBM20	0.321928
FOXC1	0.321928
DAG1	0.321928
SLAIN2	0.321928
ATR	0.321928
MAGEA6	0.321928
TRAIP	0.321928
ASRGL1	0.321928
OXSM	0.321928
PYCRL	0.321928
ARMC5	0.321928
DUS2L	0.321928
HIRIP3	0.321928
NEIL3	0.321928
MKS1	0.321928
CDCP1	0.321928
KLF15	0.321928
SPG21	0.321928
BZW2	0.321928
PRKCG	0.321928
LRRC8B	0.321928
EGFR	0.321928
PPOX	0.321928
FTSJD1	0.321928
ANGPT2	0.321928
ANXA6	0.321928
PNLIPRP2	0.321928
ATAD5	0.321928
PLXND1	0.321928
NDUFB5	0.321928
LTF	0.321928
NUDT12	0.321928
ARHGAP11A	0.321928
VAV1	0.321928
ZNF711	0.321928
MRPL2	0.321928
TNFSF8	0.321928
NINL	0.321928
ZDHHC12	0.321928
ACOT13	0.321928
OR51T1	0.321928
HDAC5	0.321928
PCDH7	0.321928
LMAN2	0.321928
TTF1	0.321928
SLC39A3	0.321928
REL	0.321928
DHX34	0.321928
RHOBTB3	0.321928
PCDH8	0.321928
TRIM2	0.321928
FRY	0.321928
MLIP	0.321928
TTC12	0.321928
CENPK	0.321928
PTPRD	0.321928
PLEKHG4B	0.321928
SPTBN4	0.321928
UQCC	0.321928
TSSC1	0.321928
ZNF557	0.321928
AKIP1	0.321928
TRIB1	0.321928
PPP1R3B	0.321928
ERO1LB	0.321928
SPARCL1	0.321928
TMED4	0.321928
KCNC2	0.321928
MAP3K15	0.321928
OR11H4	0.321928
MAMLD1	0.321928
PLA2R1	0.321928
CDH23	0.321928
NAA11	0.321928
NDUFA7	0.321928
MICU1	0.321928
NSRP1	0.321928
ZBTB38	0.321928
MANEAL	0.321928
SORT1	0.321928
CD99	0.321928
WAC	0.321928
C2CD4C	0.321928
SOX5	0.321928
ND4	0.321928
NPEPL1	0.321928
ZRANB2	0.321928
ALDOC	0.321928
SLBP	0.321928
UTS2R	0.321928
DYNC1I2	0.321928
RFTN1	0.321928
TCEB3	0.321928
DR1	0.321928
PIP4K2A	0.321928
CHEK1	0.321928
LRRC8E	0.321928
PMM2	0.321928
TBC1D23	0.321928
RBBP6	0.321928
ZCCHC11	0.321928
ATG4C	0.321928
DDX60L	0.321928
MPG	0.321928
FOXO1	0.321928
KCMF1	0.321928
HSPB8	0.321928
NACC1	0.321928
MTF1	0.321928
KIF2B	0.321928
GFPT2	0.321928
BABAM1	0.321928
KLB	0.321928
HSBP1	0.321928
DEAF1	0.321928
HEXB	0.321928
METAP1	0.321928
SLC41A2	0.321928
ATP9A	0.321928
EBNA1BP2	0.321928
INVS	0.321928
ZNF808	0.321928
KLC4	0.321928
DNAH8	0.321928
C17orf85	0.321928
ACAN	0.321928
TKT	0.321928
AKT2	0.321928
INSR	0.321928
MID1	0.321928
MRPS12	0.321928
LPAR4	0.321928
USP17L7	0.321928
ADRBK1	0.321928
TBCEL	0.321928
CGGBP1	0.321928
GLS2	0.321928
ZNF680	0.321928
ZNF155	0.321928
UTY	0.321928
ANKRD62	0.321928
PRMT7	0.321928
MPHOSPH6	0.321928
PTK6	0.321928
NOS3	0.321928
ARMC3	0.321928
MTMR3	0.321928
RANBP17	0.321928
CCP110	0.321928
LOC100288332	0.321928
WRB	0.321928
PKD1L2	0.321928
PEAK1	0.321928
ZGPAT	0.321928
PAAF1	0.321928
COX6C	0.321928
ZNF610	0.321928
IMPA1	0.321928
ANKRD36C	0.321928
MUDENG	0.321928
C9orf78	0.321928
SNTB2	0.321928
ADCY7	0.321928
FRMD1	0.321928
ADAMTSL1	0.321928
AP3B2	0.321928
ROCK1	0.321928
BCL10	0.321928
C7orf10	0.321928
BUTR1	0.321928
CLDN14	0.321928
TMCO6	0.321928
PWP2	0.321928
TTC34	0.321928
TOR1A	0.321928
DPEP1	0.321928
G0S2	0.321928
HOXA1	0.321928
ZNF280A	0.321928
TMEM177	0.321928
MPI	0.321928
SYNE1	0.321928
MYEOV	0.321928
TMEM176B	0.321928
PKD2L2	0.321928
TMEM223	0.321928
CYP4A11	0.321928
ULK4	0.321928
KIAA0355	0.321928
LOC101060589	0.321928
FAM20B	0.321928
ATP2A3	0.321928
GPBP1L1	0.321928
LCTL	0.321928
CERS4	0.321928
C4orf32	0.321928
LRRD1	0.321928
SH2D2A	0.321928
TTC9C	0.321928
WDR49	0.321928
ANAPC4	0.321928
C9	0.321928
IGFL3	0.321928
MBNL1	0.321928
CENPE	0.321928
SYT8	0.321928
SLC35A3	0.321928
RALA	0.321928
DAPK3	0.321928
GOLPH3	0.321928
GTF2H2C	0.321928
C12orf44	0.321928
ANKFY1	0.321928
DDX49	0.321928
PDZD4	0.321928
DGAT1	0.321928
ZNF444	0.321928
C15orf52	0.321928
ZMAT1	0.321928
ROBO3	0.321928
FASTKD2	0.321928
USP16	0.321928
PHC3	0.321928
TOMM40L	0.321928
NUB1	0.321928
AHNAK2	0.321928
BLOC1S1	0.321928
LOC388210	0.321928
CBR3	0.321928
HIGD2A	0.321928
MARK1	0.321928
POU2F3	0.321928
SKP2	0.321928
HCN2	0.321928
PPP1R3G	0.321928
EXOC7	0.321928
NCEH1	0.321928
ZNF224	0.321928
PI4KB	0.321928
NFS1	0.321928
PKP2	0.321928
NF2	0.321928
GAL3ST2	0.321928
GTF3C2	0.321928
FAM190A	0.321928
LHX9	0.321928
CDC42BPG	0.321928
UNC5D	0.321928
MSX1	0.321928
STOML3	0.321928
ARHGAP5	0.321928
TCEB2	0.321928
PCGF5	0.321928
MAGEB6	0.321928
ANKRD5	0.321928
LCMT1	0.321928
ITM2C	0.321928
VSTM5	0.321928
PITX1	0.321928
PKD1	0.321928
C1orf222	0.321928
GRIA2	0.321928
MINA	0.321928
C1orf144	0.321928
PWWP2B	0.321928
SMEK2	0.321928
HEATR5B	0.321928
UPK3BL	0.321928
PET112	0.321928
HDAC7	0.321928
CTTNBP2	0.321928
MCM9	0.321928
UAP1	0.321928
PDSS2	0.321928
LOC100652824	0.321928
GON4L	0.321928
COL6A1	0.321928
RP1L1	0.321928
VPS25	0.321928
TAOK1	0.321928
SOGA2	0.321928
SPPL2A	0.321928
BFAR	0.321928
INO80	0.321928
GATAD2A	0.321928
ETAA1	0.321928
BARHL1	0.321928
DNASE1L3	0.321928
SYN1	0.321928
DPP8	0.321928
HCRTR1	0.321928
HEPACAM2	0.321928
ALCAM	0.321928
FCGR3A	0.321928
REV3L	0.321928
IRS1	0.321928
LYST	0.321928
C2orf69	0.321928
TXNL4A	0.321928
P2RY2	0.321928
CDK2	0.315502
S100A11	0.314873
TMEM93	0.314109
SF3A3	0.313158
SSR4	0.313158
ARL3	0.311944
IGF2BP2	0.310929
CAPZA2	0.30895
KIAA1598	0.308122
NOP56	0.308122
SEC13	0.308122
SAE1	0.306661
UBXN2A	0.304855
CDC37	0.29956
ECI2	0.29956
KARS	0.29956
PDHB	0.29956
POP7	0.29956
SPCS1	0.29956
IDH2	0.295456
SET	0.295456
SMPD4	0.293914
CPSF6	0.293731
EEF1E1	0.293731
CGRRF1	0.289507
CYC1	0.289507
CYTB	0.289507
EIF2S3	0.289507
MTMR9	0.289507
RFC5	0.289507
SLC3A2	0.289507
TAMM41	0.289507
TCEA1	0.289507
TUBB2B	0.289507
UBQLN1	0.289507
WWOX	0.289507
YWHAZ	0.289507
NSFL1C	0.288626
IGF2BP3	0.287802
MAT2A	0.286881
ARFGAP1	0.285402
PSPC1	0.284977
ATP6V1B2	0.283793
CLPP	0.2824
CNIH4	0.280108
NARS	0.280108
POLDIP3	0.280108
RPL13	0.280108
SCD	0.280108
TPD52	0.280108
ATF6	0.278301
LMNA	0.27711
CAST	0.275634
GTF3C5	0.275634
SRP54	0.274175
C3orf75	0.273018
DGKE	0.273018
MSH5	0.273018
FUBP3	0.271302
PRDX3	0.271302
ATP2A2	0.270648
RPL27	0.267933
KHDRBS1	0.267284
CKAP4	0.265012
2022-09-11	0.263034
ARHGEF18	0.263034
ARIH2	0.263034
ASB6	0.263034
C14orf133	0.263034
C2orf89	0.263034
CDK7	0.263034
CHRND	0.263034
COIL	0.263034
COQ6	0.263034
CPT2	0.263034
CXorf26	0.263034
DPY19L1	0.263034
EBF2	0.263034
EEA1	0.263034
FBXO30	0.263034
FOXO6	0.263034
GDI1	0.263034
GGT7	0.263034
GNG4	0.263034
HEXIM1	0.263034
IDH3A	0.263034
LCLAT1	0.263034
MS4A5	0.263034
MTMR14	0.263034
NAA20	0.263034
NAA38	0.263034
NAPA	0.263034
ND6	0.263034
NEK4	0.263034
NUBPL	0.263034
PAFAH1B1	0.263034
PAN2	0.263034
PDE4DIP	0.263034
PSMG1	0.263034
PTGIS	0.263034
RAB21	0.263034
RAB39A	0.263034
RNMT	0.263034
SCD5	0.263034
SDF2	0.263034
SEC16A	0.263034
SUN2	0.263034
TIMM8A	0.263034
TMED8	0.263034
TRANK1	0.263034
TRIM32	0.263034
TYW1B	0.263034
UBE2J2	0.263034
WBP11	0.263034
ZMAT2	0.263034
PPA1	0.260652
FBL	0.258312
CCT8	0.256994
ATXN10	0.255257
BCAS2	0.255257
DCP1A	0.255257
DUT	0.255257
EZR	0.255257
PFKM	0.255257
RCC2	0.253757
SCAMP3	0.253757
IGF2R	0.251539
PFDN6	0.251539
RPS18	0.249978
YARS	0.248498
CBX1	0.247928
CLGN	0.247928
FSD1	0.247928
HSPA2	0.247928
KPNA3	0.247928
TSNAX	0.247928
AARS	0.245756
ATP6V1H	0.245113
HNRNPH2	0.243271
DSTN	0.241008
LIMD1	0.241008
RER1	0.241008
SMARCD1	0.241008
UQCR11	0.241008
EEF1A1	0.240613
PTPN1	0.239338
NONO	0.238865
CBX3	0.23816
CANX	0.235488
PTBP1	0.235251
DHX36	0.234465
PAICS	0.234465
RPL7	0.234465
SYNCRIP	0.233591
JPH1	0.231326
MCM5	0.231326
PICALM	0.231326
PIGU	0.231326
DCAF7	0.229482
RPS5	0.22741
VDAC1	0.227234
RPS20	0.226276
U2AF2	0.226276
RARS	0.225881
ASNS	0.22556
TMEM111	0.224123
ALDOA	0.222392
ALG11	0.222392
C11orf58	0.222392
C14orf102	0.222392
CNN2	0.222392
CTBP1	0.222392
GMDS	0.222392
GPX1	0.222392
HAT1	0.222392
IDH3G	0.222392
IQCB1	0.222392
JMJD6	0.222392
MAFG	0.222392
MGST3	0.222392
MTCH1	0.222392
NME3	0.222392
NUPL1	0.222392
POLI	0.222392
PRMT5	0.222392
RBM34	0.222392
RBM5	0.222392
RFT1	0.222392
ROR2	0.222392
RPL22	0.222392
RPL36A	0.222392
SENP2	0.222392
SH3KBP1	0.222392
SLC1A4	0.222392
STK24	0.222392
TOR1AIP1	0.222392
TRMT11	0.222392
TRMT112	0.222392
UBE2E2	0.222392
VPS18	0.222392
RUVBL1	0.221415
ST13	0.21864
LARS	0.216811
CHORDC1	0.214125
PHB	0.213514
EFHD1	0.211504
MYL6	0.211504
RPL28	0.211504
WDR82	0.211504
COPS3	0.209453
HP1BP3	0.209453
USP14	0.209453
SURF4	0.209096
GOLGA5	0.208587
AGK	0.206451
C17orf49	0.206451
HMGB2	0.206451
RPL35A	0.206451
HNRNPA1	0.203872
WDR36	0.203533
CSNK1D	0.201634
FBXO22	0.201634
MIS18A	0.201634
THOC2	0.201634
UBQLN2	0.201634
YIF1B	0.201634
DDX18	0.200299
TIMM50	0.199309
NOP2	0.197037
SLC16A1	0.197037
RPS6	0.194816
ESYT1	0.193429
2022-03-05	0.192645
ACADSB	0.192645
ACIN1	0.192645
AGPAT2	0.192645
AIMP2	0.192645
ANKRD28	0.192645
CHTOP	0.192645
FAM188A	0.192645
FIS1	0.192645
GGCT	0.192645
GPD2	0.192645
GTF2F1	0.192645
HMGB3	0.192645
KIF2A	0.192645
MRPS21	0.192645
NCAM1	0.192645
NSMCE1	0.192645
PATL1	0.192645
PFKP	0.192645
RAB3B	0.192645
SCAMP4	0.192645
TMEM126A	0.192645
TOMM7	0.192645
USP19	0.192645
VPS45	0.192645
WDR83	0.192645
API5	0.188445
HSPA6	0.188109
SEC24A	0.186413
PSMD4	0.185867
ADA	0.184425
EXOSC4	0.184425
RPL30	0.184425
TIMM44	0.184425
TMEM109	0.184425
STIP1	0.183446
KIAA0319	0.180572
LSM5	0.180572
TAP2	0.180572
PGRMC2	0.179634
ATP6AP1	0.178706
LSM12	0.176878
ALDH18A1	0.176498
DNM2	0.17585
TNPO1	0.175087
ACBD3	0.173332
PA2G4	0.172837
G3BP1	0.172467
ATP2C1	0.169925
BNIP1	0.169925
C14orf49	0.169925
CAPN1	0.169925
CEP85	0.169925
CISD1	0.169925
EIF3L	0.169925
EN1	0.169925
GOSR2	0.169925
KIAA0101	0.169925
MRPL11	0.169925
NAA10	0.169925
TECR	0.169925
TEX2	0.169925
UCK2	0.169925
VAMP7	0.169925
WDR81	0.169925
YWHAE	0.169925
ZC3HC1	0.169925
DHX15	0.167727
FKBP4	0.165737
ITGB1	0.165059
RAD50	0.165059
HSPA1B	0.16484
GAPVD1	0.163499
MAP2K1	0.163499
SAP30BP	0.162271
DRG1	0.161751
MYEF2	0.160465
SMARCE1	0.160465
TTK	0.160465
MAGT1	0.158698
RPS2	0.157044
ATP2B1	0.156119
EIF6	0.156119
EPHX1	0.156119
ATP5O	0.155651
ASF1B	0.155278
IGF2BP1	0.155278
RECQL	0.155278
C1orf35	0.152003
C9orf86	0.152003
EXOSC2	0.152003
LARP4	0.152003
PFDN2	0.152003
RBM42	0.152003
REEP5	0.152003
RPL26	0.152003
SLC27A4	0.152003
SRPK1	0.152003
CCT5	0.150025
HSD17B4	0.149378
STX5	0.149378
RANGAP1	0.147557
PSMD12	0.147226
RPL35	0.146841
2022-09-07	0.14439
LLGL1	0.14439
NUP88	0.14439
SLC30A5	0.14439
TUBG1	0.14439
GART	0.144157
SLC25A13	0.143735
TACC1	0.142353
UQCRFS1	0.141356
MARS	0.140598
CRKL	0.137504
LZTFL1	0.137504
SNRPN	0.137504
VANGL1	0.135655
CFL1	0.13493
NPEPPS	0.131912
HNRNPL	0.130061
CTTN	0.129283
HLCS	0.128324
HSPA5	0.128048
ADD1	0.127756
EIF4G2	0.127379
ZC3HAV1	0.127379
HNRNPU	0.127304
ACTBL2	0.125531
ARFGAP2	0.125531
GET4	0.125531
GLMN	0.125531
HSDL2	0.125531
NAA50	0.125531
NUDT1	0.125531
PDLIM7	0.125531
PLAA	0.125531
SASS6	0.125531
UBE2D3	0.125531
ZFR	0.125531
PKM2	0.124031
DEPDC1B	0.123989
PARP1	0.123989
SERBP1	0.123575
RANBP3	0.123382
HSPA1L	0.118882
PSMC2	0.118263
ARF4	0.115477
BAIAP2	0.115477
CAV1	0.115477
H1F0	0.115477
PCNP	0.115477
STMN1	0.115477
TMEM205	0.115477
EEF1B2	0.113657
TCP1	0.113147
AHSA1	0.113009
NCL	0.111814
RPL6	0.111361
CMPK1	0.111031
COASY	0.111031
SPCS2	0.111031
FKBP8	0.108934
BUB3	0.106915
C12orf23	0.106915
GK	0.106915
PDXP	0.106915
RACGAP1	0.106915
USO1	0.106915
ABCF2	0.103093
FAM49B	0.103093
LUC7L2	0.103093
USP10	0.103093
LDHA	0.10188
[truncated: 2,714 more rows]
