# Supplementary material for: Proximity Profiling of the CFTR Interaction Landscape in Response to Orkambi
Source: Int J Mol Sci. 2022 Feb 23;23(5):2442. doi: 10.3390/ijms23052442 (PMC8910062; doi:10.3390/ijms23052442)
Supplement: Supplementary file 1 [file ijms-23-02442-s001.zip › SuppDataset7_NEW.xlsx]

## Sheet: Sheet1
Bait	Prey	PreyGene	Spec	SpecSum	AvgSpec	NumReplicates	ctrlCounts	AvgP	MaxP	TopoAvgP	TopoMaxP	SaintScore	FoldChange	BFDR
F508_O	SAV_STRAV	SAV_STRAV	708|595|1028	2331	777	3	0|0|0|0|0|0|0|0|0|0|0|0|0|0|0|0	1	1	1	1	1	7770	0
F508_O	ISOC1	ISOC1	8|8|10	26	8.67	3	5|1|2|0|1|1|0|0|2|1|0|0|1|2|0|0	0.99	1	0.99	1	0.99	8.67	0
F508_O	CANX	CANX	108|98|103	309	103	3	30|9|12|15|20|14|19|21|10|10|25|20|25|21|9|10	1	1	1	1	1	6.1	0
F508_O	DCAF7	DCAF7	13|15|15	43	14.33	3	4|0|4|4|4|5|3|5|6|7|8|6|8|7|4|4	0.88	0.97	0.88	0.97	0.88	2.9	0.01
F508_O	TIMM13	TIMM13	20|25|20	65	21.67	3	0|0|0|0|0|0|0|0|0|0|0|0|0|0|0|0	1	1	1	1	1	216.67	0
F508_O	PPA1	PPA1	70|70|95	235	78.33	3	25|7|25|17|19|22|31|23|15|24|29|33|26|32|16|15	0.98	1	0.98	1	0.98	3.49	0
F508_O	HSPBP1	HSPBP1	18|13|15	46	15.33	3	0|0|1|0|1|0|0|0|0|0|1|1|1|0|1|1	1	1	1	1	1	35.05	0
F508_O	SPCS3	SPCS3	30|30|18	78	26	3	3|0|0|0|0|0|3|2|2|1|0|0|0|0|0|2	1	1	1	1	1	32	0
F508_O	SDHB	SDHB	8|8|8	24	8	3	0|0|1|1|2|3|0|2|0|0|0|0|0|0|0|0	1	1	1	1	1	14.22	0
F508_O	SCAMP1	SCAMP1	88|90|40	218	72.67	3	2|0|0|1|0|0|2|3|8|7|0|0|0|0|2|6	1	1	1	1	1	37.51	0
F508_O	GARS	GARS	53|55|60	168	56	3	15|6|5|5|7|4|7|12|2|3|6|6|7|5|4|2	1	1	1	1	1	9.33	0
F508_O	RER1	RER1	15|13|8	36	12	3	4|0|1|2|1|2|1|0|0|4|2|2|2|3|3|1	1	1	1	1	1	6.86	0
F508_O	PTPLAD1	PTPLAD1	100|93|105	298	99.33	3	22|13|23|17|23|13|25|25|22|19|35|34|33|30|34|28	1	1	1	1	1	4.01	0
F508_O	RG9MTD1	RG9MTD1	13|10|23	46	15.33	3	5|2|0|0|2|2|1|2|3|0|3|3|3|0|3|3	1	1	1	1	1	7.67	0
F508_O	KRR1	KRR1	10|5|5	20	6.67	3	2|2|0|0|0|1|0|3|0|0|0|0|0|0|2|1	0.99	1	0.99	1	0.99	9.7	0
F508_O	SRSF1	SRSF1	30|25|30	85	28.33	3	17|1|7|4|7|1|4|8|2|4|8|6|10|11|6|4	1	1	1	1	1	4.53	0
F508_O	RPS18	RPS18	58|55|50	163	54.33	3	5|0|6|8|9|8|7|5|2|2|7|6|10|8|3|4	1	1	1	1	1	9.66	0
F508_O	DHCR7	DHCR7	13|18|30	61	20.33	3	4|0|2|2|3|0|0|0|0|2|2|3|3|4|2|3	1	1	1	1	1	10.84	0
F508_O	IGF2R	IGF2R	8|8|23	39	13	3	0|0|0|0|0|0|0|0|3|0|0|1|0|0|0|0	1	1	1	1	1	52	0
F508_O	NNT	NNT	35|23|20	78	26	3	4|0|6|4|7|3|1|0|1|0|5|4|4|4|0|2	1	1	1	1	1	9.24	0
F508_O	POR	POR	35|48|73	156	52	3	2|3|0|0|0|0|0|2|0|0|0|0|0|0|0|0	1	1	1	1	1	118.86	0
F508_O	DDRGK1	DDRGK1	33|20|48	101	33.67	3	4|2|0|1|0|0|1|2|2|1|0|1|2|2|3|5	1	1	1	1	1	20.72	0
F508_O	DCTPP1	DCTPP1	8|3|13	24	8	3	2|0|0|0|1|1|3|3|1|2|1|1|3|2|0|0	0.84	1	0.84	1	0.84	6.4	0.01
F508_O	CCDC86	CCDC86	8|10|10	28	9.33	3	0|0|0|2|4|4|2|4|0|0|0|0|2|2|0|1	0.99	0.99	0.99	0.99	0.99	7.11	0
F508_O	TMEM43	TMEM43	10|5|10	25	8.33	3	0|2|0|0|1|0|1|0|0|0|0|0|0|0|0|1	1	1	1	1	1	26.67	0
F508_O	NUP85	NUP85	15|10|10	35	11.67	3	9|3|1|0|4|0|0|3|1|2|3|6|5|5|5|6	0.85	0.99	0.85	0.99	0.85	3.52	0.01
F508_O	RPS5	RPS5	40|28|18	86	28.67	3	13|2|5|4|0|4|6|5|11|10|15|11|11|8|0|0	0.77	1	0.77	1	0.77	4.37	0.01
F508_O	VAMP8	VAMP8	5|5|5	15	5	3	0|0|0|1|0|0|0|0|0|0|0|0|0|0|0|1	1	1	1	1	1	40	0
F508_O	HNRNPH3	HNRNPH3	25|30|45	100	33.33	3	4|2|3|0|3|5|4|7|5|4|4|2|3|2|0|3	1	1	1	1	1	10.46	0
F508_O	ESYT1	ESYT1	145|115|178	438	146	3	54|32|26|34|23|20|31|29|47|39|36|29|41|41|42|42	1	1	1	1	1	4.13	0
F508_O	NTPCR	NTPCR	38|38|43	119	39.67	3	16|5|6|3|7|8|4|6|1|4|2|0|3|2|0|0	1	1	1	1	1	9.47	0
F508_O	RPS12	RPS12	115|115|155	385	128.33	3	12|9|9|6|9|10|16|17|25|25|12|12|11|6|0|5	1	1	1	1	1	11.16	0
F508_O	SEC23B	SEC23B	20|15|20	55	18.33	3	11|0|6|4|7|5|4|5|13|9|0|1|0|0|5|5	0.91	0.98	0.91	0.98	0.91	3.91	0
F508_O	C1orf226	C1orf226	103|88|75	266	88.67	3	0|0|0|0|0|0|0|0|0|0|0|0|0|0|0|0	1	1	1	1	1	886.67	0
F508_O	GPR89A	GPR89A	13|8|13	34	11.33	3	4|3|3|1|0|0|3|1|2|5|1|2|0|1|0|0	0.99	1	0.99	1	0.99	6.97	0
F508_O	HNRNPF	HNRNPF	118|103|115	336	112	3	41|30|42|38|31|35|41|41|46|47|21|17|19|24|22|27	0.93	1	0.93	1	0.93	3.43	0
F508_O	CECR5	CECR5	20|8|13	41	13.67	3	4|1|1|2|0|4|1|1|0|0|3|1|3|2|1|0	1	1	1	1	1	9.11	0
F508_O	ANKLE2	ANKLE2	13|10|10	33	11	3	2|0|1|1|0|1|0|3|8|10|1|1|3|2|2|0	0.95	0.98	0.95	0.98	0.95	5.03	0
F508_O	SRP14	SRP14	15|18|28	61	20.33	3	6|4|2|3|5|4|11|7|5|9|7|6|8|5|6|7	0.84	1	0.84	1	0.84	3.42	0.01
F508_O	GAR1	GAR1	10|8|10	28	9.33	3	4|0|2|2|1|1|1|4|0|0|0|0|0|0|1|0	1	1	1	1	1	9.33	0
F508_O	ATP6AP2	ATP6AP2	23|18|38	79	26.33	3	0|0|0|0|0|0|0|0|0|0|0|0|0|0|0|0	1	1	1	1	1	263.33	0
F508_O	AGPAT1	AGPAT1	23|33|25	81	27	3	0|0|0|0|0|0|0|0|0|0|1|0|0|0|0|0	1	1	1	1	1	270	0
F508_O	TMX1	TMX1	23|20|15	58	19.33	3	0|0|0|0|1|0|2|1|4|2|0|0|0|1|0|0	1	1	1	1	1	28.12	0
F508_O	FIS1	FIS1	8|5|18	31	10.33	3	0|0|0|0|0|0|0|0|1|0|0|0|0|0|0|0	1	1	1	1	1	103.33	0
F508_O	MARCKS	MARCKS	5|5|10	20	6.67	3	0|0|0|0|0|0|0|0|0|0|2|1|0|5|1|1	0.97	1	0.97	1	0.97	10.67	0
F508_O	IMMT	IMMT	18|18|13	49	16.33	3	4|1|4|4|6|5|0|0|0|1|2|2|2|5|0|2	1	1	1	1	1	6.88	0
F508_O	GLS	GLS	8|5|8	21	7	3	0|0|1|0|0|0|0|0|0|0|0|1|0|0|0|0	1	1	1	1	1	56	0
F508_O	SDHA	SDHA	18|18|5	41	13.67	3	1|3|2|0|0|2|1|2|2|2|2|2|3|1|0|0	0.96	1	0.96	1	0.96	9.51	0
F508_O	TOE1	TOE1	5|3|8	16	5.33	3	1|0|0|0|0|0|2|3|0|0|0|0|0|0|0|1	0.97	1	0.97	1	0.97	12.19	0
F508_O	HEATR2	HEATR2	5|5|13	23	7.67	3	4|1|2|0|1|2|3|2|0|0|1|1|1|2|0|0	0.96	1	0.96	1	0.96	6.13	0
F508_O	NOC2L	NOC2L	20|8|8	36	12	3	3|0|1|0|1|3|0|0|6|4|5|7|7|4|0|4	0.78	1	0.78	1	0.78	4.27	0.01
F508_O	RPL34	RPL34	8|10|10	28	9.33	3	4|0|3|4|2|3|2|5|1|0|5|5|5|3|3|0	0.92	0.98	0.92	0.98	0.92	3.32	0
F508_O	SPCS2	SPCS2	23|25|10	58	19.33	3	2|1|0|0|0|0|0|0|1|2|0|0|0|0|0|0	1	1	1	1	1	51.56	0
F508_O	UQCRFS1	UQCRFS1	38|33|25	96	32	3	7|4|4|3|1|2|5|2|0|0|0|4|3|6|3|4	1	1	1	1	1	10.67	0
F508_O	DYNC1LI1	DYNC1LI1	5|8|8	21	7	3	3|0|1|3|0|1|4|2|1|0|2|1|0|5|3|0	0.91	0.98	0.91	0.98	0.91	4.31	0
F508_O	SSR1	SSR1	28|28|25	81	27	3	2|2|0|2|0|0|1|2|3|1|0|1|0|0|0|0	1	1	1	1	1	30.86	0
F508_O	SLC1A3	SLC1A3	15|13|13	41	13.67	3	2|0|2|3|2|4|1|0|0|0|2|1|1|3|0|0	1	1	1	1	1	10.41	0
F508_O	ATP13A1	ATP13A1	5|3|5	13	4.33	3	4|0|0|0|0|0|0|1|1|0|0|0|0|0|0|0	0.97	0.98	0.97	0.98	0.97	11.56	0
F508_O	COX5B	COX5B	20|15|8	43	14.33	3	1|0|0|0|0|0|0|0|0|0|0|0|0|0|0|0	1	1	1	1	1	143.33	0
F508_O	STX7	STX7	40|33|25	98	32.67	3	6|0|0|0|0|0|0|1|3|4|0|0|0|0|0|0	1	1	1	1	1	37.33	0
F508_O	ATP6AP1	ATP6AP1	28|35|40	103	34.33	3	1|0|0|1|0|0|0|0|1|1|0|0|0|0|0|0	1	1	1	1	1	137.33	0
F508_O	CCDC47	CCDC47	158|140|133	431	143.67	3	8|3|2|2|5|0|6|3|13|14|1|1|4|4|0|3	1	1	1	1	1	33.31	0
F508_O	OSBPL8	OSBPL8	28|30|33	91	30.33	3	20|2|4|9|9|5|6|5|6|8|13|13|15|12|4|3	0.96	0.99	0.96	0.99	0.96	3.62	0
F508_O	PTPN2	PTPN2	5|3|8	16	5.33	3	0|0|0|0|0|0|1|2|3|5|0|0|0|0|4|3	0.85	0.98	0.85	0.98	0.85	4.74	0.01
F508_O	PARK7	PARK7	63|50|20	133	44.33	3	10|0|12|8|11|6|4|6|3|5|2|0|7|6|2|3	0.99	1	0.99	1	0.99	8.35	0
F508_O	APEX1	APEX1	13|15|8	36	12	3	6|5|0|0|0|1|9|5|6|6|0|0|1|0|3|3	0.87	0.98	0.87	0.98	0.87	4.27	0.01
F508_O	VAT1	VAT1	23|15|20	58	19.33	3	1|0|0|0|0|1|0|2|2|1|0|0|0|0|0|0	1	1	1	1	1	44.19	0
F508_O	ZMPSTE24	ZMPSTE24	30|15|15	60	20	3	7|2|3|2|0|0|2|1|0|0|1|0|0|1|0|0	1	1	1	1	1	16.84	0
F508_O	NDUFS7	NDUFS7	10|20|13	43	14.33	3	2|0|0|0|0|0|2|4|2|0|0|1|1|1|3|0	1	1	1	1	1	14.33	0
F508_O	SNAP23	SNAP23	28|28|38	94	31.33	3	4|2|2|1|3|2|7|8|7|8|3|2|3|3|4|4	1	1	1	1	1	7.96	0
F508_O	HMOX2	HMOX2	18|13|40	71	23.67	3	1|0|0|0|0|0|0|0|4|3|1|0|2|1|0|0	1	1	1	1	1	31.56	0
F508_O	OPA1	OPA1	5|5|13	23	7.67	3	2|0|0|1|0|0|1|3|0|0|0|0|0|0|0|0	0.99	1	0.99	1	0.99	17.52	0
F508_O	ETFA	ETFA	40|30|33	103	34.33	3	14|4|5|2|3|2|0|0|2|5|7|4|3|7|7|4	1	1	1	1	1	7.96	0
F508_O	TFRC	TFRC	38|43|93	174	58	3	0|0|3|1|3|0|2|2|0|0|0|1|0|0|0|0	1	1	1	1	1	77.33	0
F508_O	TM9SF3	TM9SF3	15|15|15	45	15	3	2|3|4|4|2|0|3|5|2|2|3|3|3|2|2|2	1	1	1	1	1	5.71	0
F508_O	COX5A	COX5A	13|10|5	28	9.33	3	2|1|0|0|0|0|3|3|3|3|0|0|0|0|1|0	0.98	1	0.98	1	0.98	9.33	0
F508_O	NSDHL	NSDHL	40|43|35	118	39.33	3	10|7|8|7|7|11|6|10|13|12|9|10|10|11|7|8	1	1	1	1	1	4.31	0
F508_O	NIPSNAP1	NIPSNAP1	10|13|5	28	9.33	3	2|0|0|0|0|0|0|0|1|2|1|1|0|0|0|1	1	1	1	1	1	18.67	0
F508_O	CYB5R3	CYB5R3	48|40|23	111	37	3	21|2|6|9|9|9|11|7|10|9|10|8|7|12|3|3	0.77	1	0.77	1	0.77	4.35	0.01
F508_O	DNAJB12	DNAJB12	8|3|5	16	5.33	3	0|0|0|0|0|0|0|0|0|0|0|0|0|0|0|0	1	1	1	1	1	53.33	0
F508_O	SRP9	SRP9	18|18|13	49	16.33	3	4|0|3|2|2|2|3|4|3|2|0|0|0|0|2|2	1	1	1	1	1	9.01	0
F508_O	SURF4	SURF4	53|53|55	161	53.67	3	25|24|28|21|22|18|12|10|10|8|17|16|23|20|8|4	0.87	0.94	0.87	0.94	0.87	3.23	0.01
F508_O	HYOU1	HYOU1	43|38|50	131	43.67	3	19|10|11|15|9|4|4|5|1|0|9|10|11|8|2|2	1	1	1	1	1	5.82	0
F508_O	CKAP4	CKAP4	125|115|93	333	111	3	26|4|15|14|16|13|25|30|13|10|17|14|19|14|1|2	1	1	1	1	1	7.62	0
F508_O	ST13	ST13	28|28|13	69	23	3	2|0|0|0|0|0|4|6|3|2|0|0|0|3|3|2	1	1	1	1	1	14.72	0
F508_O	SCP2	SCP2	8|10|18	36	12	3	0|0|0|0|0|0|0|0|0|0|0|0|0|0|0|0	1	1	1	1	1	120	0
F508_O	BRI3BP	BRI3BP	5|5|5	15	5	3	0|0|0|0|0|0|0|0|0|0|0|0|0|3|0|0	1	1	1	1	1	26.67	0
F508_O	DDOST	DDOST	53|40|60	153	51	3	23|7|11|9|10|8|13|11|9|12|18|16|22|19|7|5	0.98	1	0.98	1	0.98	4.08	0
F508_O	HADHA	HADHA	65|60|75	200	66.67	3	15|3|1|4|3|2|5|7|2|1|1|0|3|4|1|2	1	1	1	1	1	19.75	0
F508_O	AIP	AIP	5|15|5	25	8.33	3	0|0|0|0|0|0|0|1|1|2|0|0|0|0|0|0	1	1	1	1	1	33.33	0
F508_O	DHX30	DHX30	48|38|50	136	45.33	3	15|3|7|10|7|8|9|12|6|7|14|11|9|9|0|3	1	1	1	1	1	5.58	0
F508_O	ATP6V1F	ATP6V1F	13|13|10	36	12	3	0|0|0|0|0|0|2|1|3|4|0|0|0|0|0|1	1	1	1	1	1	17.45	0
F508_O	VANGL1	VANGL1	15|20|28	63	21	3	0|0|0|0|0|0|2|2|3|4|0|0|0|0|0|1	1	1	1	1	1	28	0
F508_O	VDAC3	VDAC3	105|138|85	328	109.33	3	32|0|22|19|21|21|28|28|24|23|29|27|20|23|14|16	1	1	1	1	1	5.04	0
F508_O	RPN2	RPN2	120|90|108	318	106	3	49|27|34|20|22|28|26|29|11|14|37|33|41|43|13|16	0.79	1	0.79	1	0.79	3.83	0.01
F508_O	EPHX1	EPHX1	15|15|20	50	16.67	3	0|0|0|0|0|0|0|0|0|0|0|0|0|0|0|0	1	1	1	1	1	166.67	0
F508_O	GRAMD1A	GRAMD1A	5|5|5	15	5	3	3|0|0|0|1|0|1|2|1|0|0|0|0|0|0|0	0.99	0.99	0.99	0.99	0.99	10	0
F508_O	STIM1	STIM1	10|10|20	40	13.33	3	7|3|1|2|0|2|0|0|3|2|1|1|0|1|2|0	0.99	1	0.99	1	0.99	8.53	0
F508_O	MCTS1	MCTS1	10|8|13	31	10.33	3	6|3|0|0|0|0|4|2|4|2|0|1|0|0|0|0	0.98	1	0.98	1	0.98	7.52	0
F508_O	BCAP31	BCAP31	5|5|8	18	6	3	1|0|0|1|1|2|0|0|0|0|1|0|2|0|3|3	0.98	1	0.98	1	0.98	6.86	0
F508_O	RBM42	RBM42	10|10|8	28	9.33	3	1|0|0|0|0|0|0|0|3|3|0|0|0|0|0|0	1	1	1	1	1	21.33	0
F508_O	UCHL1	UCHL1	8|8|8	24	8	3	1|0|3|4|2|2|1|2|1|0|2|3|4|3|1|3	0.98	0.98	0.98	0.98	0.98	4	0
F508_O	PSMC3	PSMC3	78|65|120	263	87.67	3	18|10|19|19|22|25|13|12|11|16|16|15|19|19|5|12	1	1	1	1	1	5.59	0
F508_O	TOMM34	TOMM34	10|15|5	30	10	3	3|0|1|1|3|1|3|1|3|2|0|0|0|1|3|6	0.9	1	0.9	1	0.9	5.71	0.01
F508_O	ATP5F1	ATP5F1	25|28|8	61	20.33	3	2|0|0|1|4|2|0|0|0|0|0|1|1|0|0|0	1	1	1	1	1	29.58	0
F508_O	SLC38A2	SLC38A2	55|45|48	148	49.33	3	7|6|0|2|2|4|6|3|2|2|2|4|3|4|1|0	1	1	1	1	1	16.44	0
F508_O	PDIA3	PDIA3	18|28|15	61	20.33	3	9|3|5|7|6|6|1|2|4|3|3|7|9|7|2|4	0.99	1	0.99	1	0.99	4.17	0
F508_O	DNAJC1	DNAJC1	5|5|8	18	6	3	0|0|0|0|0|0|0|0|0|0|0|0|0|0|0|0	1	1	1	1	1	60	0
F508_O	CCDC115	CCDC115	8|5|10	23	7.67	3	0|0|0|0|0|0|0|0|2|4|0|0|0|0|3|2	0.98	1	0.98	1	0.98	11.15	0
F508_O	AGPAT9	AGPAT9	18|18|33	69	23	3	0|0|0|0|0|0|0|0|0|0|0|0|0|0|0|0	1	1	1	1	1	230	0
F508_O	SLC25A1	SLC25A1	40|33|33	106	35.33	3	11|0|9|5|8|7|10|11|5|9|14|13|12|12|7|3	1	1	1	1	1	4.16	0
F508_O	MAGT1	MAGT1	15|13|13	41	13.67	3	3|4|0|0|0|3|0|3|2|1|0|0|0|0|1|1	1	1	1	1	1	12.15	0
F508_O	MATR3	MATR3	133|113|93	339	113	3	39|22|19|29|20|24|27|23|31|38|34|34|32|35|38|36	1	1	1	1	1	3.76	0
F508_O	NUDCD2	NUDCD2	10|5|5	20	6.67	3	0|0|0|0|1|0|2|4|8|10|0|0|0|0|0|0	0.87	0.96	0.87	0.96	0.87	4.27	0.01
F508_O	SAR1A	SAR1A	33|30|38	101	33.67	3	8|1|5|2|3|2|8|7|4|5|3|2|2|3|3|2	1	1	1	1	1	8.98	0
F508_O	ANXA11	ANXA11	8|5|20	33	11	3	0|0|0|0|0|0|2|3|0|0|0|0|0|0|0|0	1	1	1	1	1	35.2	0
F508_O	CPD	CPD	25|23|23	71	23.67	3	3|0|0|0|0|0|0|0|4|4|0|0|0|0|2|4	1	1	1	1	1	22.27	0
F508_O	NDUFV2	NDUFV2	20|18|25	63	21	3	0|1|0|1|0|1|0|3|0|0|0|0|0|2|3|2	1	1	1	1	1	25.85	0
F508_O	MTHFD1	MTHFD1	148|158|138	444	148	3	48|17|45|47|40|41|39|42|16|15|63|56|51|52|19|23	0.96	1	0.96	1	0.96	3.86	0
F508_O	LSG1	LSG1	33|25|28	86	28.67	3	2|2|3|7|7|7|12|13|18|20|4|5|6|4|5|5	0.93	0.99	0.93	0.99	0.93	3.82	0
F508_O	MTDH	MTDH	43|38|40	121	40.33	3	23|5|17|16|10|9|12|13|12|16|11|15|13|21|20|15	0.83	1	0.83	1	0.83	2.83	0.01
F508_O	TXNDC5	TXNDC5	18|13|13	44	14.67	3	3|2|0|1|3|2|3|1|0|0|3|2|2|1|1|2	1	1	1	1	1	9.03	0
F508_O	STT3A	STT3A	50|30|63	143	47.67	3	11|6|13|5|11|14|9|8|5|5|6|8|11|10|6|13	1	1	1	1	1	5.41	0
F508_O	MCM5	MCM5	55|73|68	196	65.33	3	18|1|13|18|13|3|18|18|8|12|9|11|12|18|15|16	1	1	1	1	1	5.15	0
F508_O	UBXN4	UBXN4	63|35|63	161	53.67	3	4|2|3|2|1|2|0|0|5|5|2|3|2|5|3|4	1	1	1	1	1	19.97	0
F508_O	RAB11FIP5	RAB11FIP5	5|13|15	33	11	3	0|0|0|0|1|0|1|0|1|1|3|0|1|0|2|2	1	1	1	1	1	14.67	0
F508_O	C20orf3	C20orf3	13|5|8	26	8.67	3	3|2|0|1|1|0|0|0|0|0|0|2|0|0|0|0	0.99	1	0.99	1	0.99	15.41	0
F508_O	LRRC47	LRRC47	28|38|15	81	27	3	4|0|0|2|0|1|1|2|4|6|0|0|0|2|0|1	1	1	1	1	1	18.78	0
F508_O	FAR1	FAR1	5|3|18	26	8.67	3	0|0|1|0|0|0|1|1|1|3|2|4|0|2|2|3	0.81	1	0.81	1	0.81	6.93	0.01
F508_O	TECR	TECR	20|43|43	106	35.33	3	5|1|6|9|6|7|5|3|1|1|8|8|10|10|6|6	1	1	1	1	1	6.14	0
F508_O	RRP7A	RRP7A	8|3|8	19	6.33	3	4|1|1|1|1|0|0|0|2|0|1|2|0|1|3|0	0.89	1	0.89	1	0.89	5.96	0.01
F508_O	ND1	ND1	5|3|8	16	5.33	3	4|0|0|0|2|0|2|0|0|0|0|0|0|0|0|0	0.96	1	0.96	1	0.96	10.67	0
F508_O	COX2	COX2	30|23|35	88	29.33	3	18|6|7|4|11|9|3|5|10|6|2|7|8|6|4|9	0.98	1	0.98	1	0.98	4.08	0
F508_O	PSMD7	PSMD7	10|5|15	30	10	3	0|0|2|0|0|0|0|0|0|0|3|2|3|2|0|1	0.99	1	0.99	1	0.99	12.31	0
F508_O	ECI2	ECI2	10|13|8	31	10.33	3	5|2|5|5|2|2|2|0|0|0|4|4|4|5|2|2	0.94	1	0.94	1	0.94	3.76	0
F508_O	NDUFA13	NDUFA13	20|28|28	76	25.33	3	7|1|2|0|0|0|0|0|0|0|5|5|4|6|3|4	1	1	1	1	1	10.95	0
F508_O	NDUFS2	NDUFS2	23|18|13	54	18	3	2|0|1|0|1|0|3|2|1|1|4|2|4|3|2|2	1	1	1	1	1	10.29	0
F508_O	COX7A2	COX7A2	15|10|10	35	11.67	3	3|0|0|1|0|1|4|4|3|4|2|3|3|3|0|1	1	1	1	1	1	5.83	0
F508_O	EIF2B3	EIF2B3	15|18|13	46	15.33	3	0|1|0|0|0|0|6|7|1|1|0|1|0|0|1|1	1	1	1	1	1	12.91	0
F508_O	NDUFB4	NDUFB4	13|3|3	19	6.33	3	0|0|0|0|0|0|0|0|0|0|0|0|0|0|0|0	1	1	1	1	1	63.33	0
F508_O	TMEM48	TMEM48	20|15|28	63	21	3	1|1|0|0|0|0|1|0|0|1|1|0|3|5|0|0	1	1	1	1	1	25.85	0
F508_O	MRPL12	MRPL12	15|18|20	53	17.67	3	0|2|0|0|0|0|0|0|0|0|0|0|0|0|0|0	1	1	1	1	1	141.33	0
F508_O	MMGT1	MMGT1	20|18|15	53	17.67	3	0|0|0|0|0|0|0|0|0|0|0|0|0|0|0|0	1	1	1	1	1	176.67	0
F508_O	IDH3B	IDH3B	10|10|10	30	10	3	11|2|3|2|2|3|0|1|4|2|3|2|2|2|3|2	0.92	0.92	0.92	0.92	0.92	3.64	0
F508_O	IDH2	IDH2	10|10|10	30	10	3	2|0|1|0|3|0|5|0|0|0|3|0|0|2|0|0	0.99	0.99	0.99	0.99	0.99	10	0
F508_O	SRPRB	SRPRB	23|25|30	78	26	3	4|0|1|1|3|1|4|7|7|8|5|5|5|7|6|3	1	1	1	1	1	6.21	0
F508_O	PSMD11	PSMD11	38|30|30	98	32.67	3	10|5|9|7|8|5|4|6|9|9|4|6|7|7|12|14	1	1	1	1	1	4.28	0
F508_O	PEG10	PEG10	8|5|3	16	5.33	3	0|0|0|0|0|0|1|2|3|2|0|0|0|0|0|0	0.96	1	0.96	1	0.96	10.67	0
F508_O	STX12	STX12	18|13|20	51	17	3	0|0|0|0|0|0|0|0|0|3|0|0|0|0|0|0	1	1	1	1	1	90.67	0
F508_O	RAB11FIP1	RAB11FIP1	23|23|45	91	30.33	3	4|2|5|3|3|4|1|0|7|7|3|6|4|4|8|7	1	1	1	1	1	7.14	0
F508_O	LDHB	LDHB	33|33|23	89	29.67	3	12|3|7|5|5|6|6|4|9|8|8|8|7|3|3|5	1	1	1	1	1	4.79	0
F508_O	PGRMC2	PGRMC2	70|98|80	248	82.67	3	21|2|7|5|7|10|8|10|24|23|8|10|13|11|21|23	1	1	1	1	1	6.52	0
F508_O	ECI1	ECI1	10|13|8	31	10.33	3	5|1|0|0|0|0|0|0|0|0|0|0|0|0|0|0	1	1	1	1	1	27.56	0
F508_O	PDZD8	PDZD8	8|5|10	23	7.67	3	2|0|0|0|0|0|1|0|3|3|0|0|0|0|0|1	0.99	1	0.99	1	0.99	12.27	0
F508_O	GORASP2	GORASP2	13|5|10	28	9.33	3	4|1|0|0|0|0|0|7|7|7|0|0|0|0|3|0	0.88	0.98	0.88	0.98	0.88	5.15	0.01
F508_O	EIF2S2	EIF2S2	38|35|38	111	37	3	10|5|9|6|5|9|11|10|18|14|7|7|7|8|7|10	1	1	1	1	1	4.14	0
F508_O	AFG3L2	AFG3L2	13|15|20	48	16	3	6|0|0|3|1|0|6|2|6|0|6|5|4|3|3|2	0.99	1	0.99	1	0.99	5.45	0
F508_O	SLC33A1	SLC33A1	18|18|10	46	15.33	3	1|0|0|0|0|0|1|0|0|2|0|0|0|0|1|1	1	1	1	1	1	40.89	0
F508_O	PSME2	PSME2	15|10|13	38	12.67	3	6|2|3|5|0|1|0|2|0|0|4|1|5|7|0|0	0.98	0.99	0.98	0.99	0.98	5.63	0
F508_O	DCXR	DCXR	10|23|18	51	17	3	0|0|0|0|0|0|0|0|0|0|0|0|0|0|0|0	1	1	1	1	1	170	0
F508_O	AGPAT6	AGPAT6	28|13|33	74	24.67	3	0|0|0|0|0|0|0|1|0|0|0|0|0|0|0|0	1	1	1	1	1	246.67	0
F508_O	GSR	GSR	8|10|8	26	8.67	3	0|0|0|0|0|0|0|0|0|0|0|0|0|0|0|0	1	1	1	1	1	86.67	0
F508_O	STT3B	STT3B	18|25|23	66	22	3	5|0|6|2|2|2|4|6|0|2|2|3|5|3|0|0	1	1	1	1	1	8.38	0
F508_O	SMC1A	SMC1A	58|58|55	171	57	3	19|5|19|13|15|17|16|22|20|15|14|18|16|14|12|16	1	1	1	1	1	3.63	0
F508_O	PSME1	PSME1	25|23|20	68	22.67	3	6|1|2|2|2|0|7|8|11|12|0|0|1|0|1|5	0.99	0.99	0.99	0.99	0.99	6.25	0
F508_O	HSDL2	HSDL2	8|5|10	23	7.67	3	3|1|1|1|1|0|0|3|1|2|2|3|5|4|0|1	0.91	1	0.91	1	0.91	4.38	0.01
F508_O	CERS2	CERS2	13|5|10	28	9.33	3	3|0|1|1|1|1|0|0|0|0|0|2|1|1|1|3	0.99	1	0.99	1	0.99	9.96	0
F508_O	EXOC3	EXOC3	73|55|113	241	80.33	3	2|3|1|0|2|1|2|0|3|3|1|2|0|1|6|6	1	1	1	1	1	38.95	0
F508_O	ATP5J2-PTCD1	ATP5J2-PTCD1	30|28|43	101	33.67	3	10|9|9|7|9|7|8|6|4|6|10|8|9|9|0|2	1	1	1	1	1	4.77	0
F508_O	RPS17	RPS17	55|50|38	143	47.67	3	13|10|15|13|10|10|12|25|13|9|14|15|13|10|2|0	0.98	1	0.98	1	0.98	4.14	0
F508_O	FAM158A	FAM158A	58|40|48	146	48.67	3	0|0|0|0|0|0|0|0|0|0|0|0|0|0|0|0	1	1	1	1	1	486.67	0
F508_O	SLC35F2	SLC35F2	40|30|18	88	29.33	3	0|0|0|0|0|0|0|0|0|0|0|0|0|0|0|0	1	1	1	1	1	293.33	0
F508_O	HSPD1	HSPD1	353|330|250	933	311	3	93|36|57|59|45|50|44|38|10|18|79|74|73|78|22|18	1	1	1	1	1	6.27	0
F508_O	LRPPRC	LRPPRC	48|43|48	139	46.33	3	13|8|8|13|14|18|1|4|0|1|8|9|12|5|2|3	1	1	1	1	1	6.23	0
F508_O	PFAS	PFAS	18|10|15	43	14.33	3	1|0|0|1|0|0|2|1|2|2|1|3|1|2|0|2	1	1	1	1	1	12.74	0
F508_O	NDUFS1	NDUFS1	28|30|38	96	32	3	6|0|1|0|3|2|6|3|2|3|3|2|0|6|2|6	1	1	1	1	1	11.38	0
F508_O	NUP35	NUP35	5|3|3	11	3.67	3	0|0|0|0|0|0|0|0|1|0|0|0|0|0|0|0	1	1	1	1	1	36.67	0
F508_O	SARNP	SARNP	18|20|15	53	17.67	3	3|1|0|0|0|0|3|5|4|3|1|0|1|0|8|6	1	1	1	1	1	8.08	0
F508_O	SCARB2	SCARB2	8|3|8	19	6.33	3	2|0|0|0|0|0|0|0|0|0|0|0|0|0|0|0	1	1	1	1	1	50.67	0
F508_O	SERPINH1	SERPINH1	55|60|55	170	56.67	3	19|4|14|10|13|12|10|10|10|8|24|30|24|27|16|17	0.99	1	0.99	1	0.99	3.66	0
F508_O	PRDX3	PRDX3	70|78|53	201	67	3	14|6|7|8|13|6|7|12|3|3|6|4|8|7|2|5	1	1	1	1	1	9.66	0
F508_O	SSR4	SSR4	35|30|55	120	40	3	19|4|5|5|9|1|3|9|7|8|13|10|12|10|6|8	1	1	1	1	1	4.96	0
F508_O	OCLN	OCLN	30|30|20	80	26.67	3	0|0|0|0|0|0|0|0|2|0|0|0|0|0|0|0	1	1	1	1	1	213.33	0
F508_O	UBE2D3	UBE2D3	10|10|15	35	11.67	3	4|0|3|5|4|5|4|2|0|0|4|3|4|3|0|0	0.98	1	0.98	1	0.98	4.55	0
F508_O	PCNA	PCNA	53|35|38	126	42	3	7|2|5|3|8|4|14|9|6|11|2|3|2|2|5|3	1	1	1	1	1	7.81	0
F508_O	MCM2	MCM2	15|15|35	65	21.67	3	9|0|5|1|4|5|6|2|1|2|8|6|8|10|5|3	0.93	1	0.93	1	0.93	4.62	0
F508_O	PODXL	PODXL	13|5|13	31	10.33	3	0|0|0|0|0|0|0|0|0|0|0|0|0|0|0|0	1	1	1	1	1	103.33	0
F508_O	TIMM44	TIMM44	23|10|18	51	17	3	4|3|4|4|8|4|4|4|2|5|3|3|5|4|1|1	0.92	1	0.92	1	0.92	4.61	0
F508_O	LPCAT1	LPCAT1	8|3|15	26	8.67	3	4|1|1|1|0|0|0|0|1|0|2|2|2|2|0|0	0.9	1	0.9	1	0.9	8.67	0.01
F508_O	BCKDHB	BCKDHB	8|5|10	23	7.67	3	7|1|2|3|1|1|1|0|0|0|2|0|3|2|0|0	0.93	0.99	0.93	0.99	0.93	5.33	0
F508_O	RAB7A	RAB7A	90|80|68	238	79.33	3	12|5|6|4|2|0|3|7|6|4|8|3|6|6|3|4	1	1	1	1	1	16.07	0
F508_O	ADCK3	ADCK3	10|8|8	26	8.67	3	2|0|4|1|3|2|4|3|1|3|5|1|1|1|4|4	0.95	0.99	0.95	0.99	0.95	3.56	0
F508_O	TUFM	TUFM	190|158|180	528	176	3	52|13|40|39|45|35|52|44|47|54|72|72|67|53|25|32	0.8	1	0.8	1	0.8	3.8	0.01
F508_O	RAB23	RAB23	10|10|5	25	8.33	3	0|0|0|0|0|0|0|1|4|3|0|0|0|0|0|0	0.99	1	0.99	1	0.99	16.67	0
F508_O	UBE2I	UBE2I	13|13|23	49	16.33	3	5|1|7|6|4|5|2|2|0|0|6|5|4|0|6|2	0.99	1	0.99	1	0.99	4.75	0
F508_O	UBE2J1	UBE2J1	13|8|18	39	13	3	0|0|0|0|0|0|2|0|2|0|0|0|0|0|0|0	1	1	1	1	1	52	0
F508_O	SEC22B	SEC22B	13|18|15	46	15.33	3	8|2|5|5|4|4|4|4|6|5|3|3|4|4|6|6	0.96	1	0.96	1	0.96	3.36	0
F508_O	HNRNPH1	HNRNPH1	155|160|155	470	156.67	3	55|33|67|62|52|59|40|40|43|45|47|47|38|53|22|27	1	1	1	1	1	3.43	0
F508_O	SEC23A	SEC23A	20|23|40	83	27.67	3	0|6|7|0|5|0|7|6|8|7|1|2|0|3|6|6	1	1	1	1	1	6.92	0
F508_O	BSG	BSG	30|25|23	78	26	3	7|2|1|2|0|2|3|2|0|1|7|4|5|3|2|3	1	1	1	1	1	9.45	0
F508_O	SEC24C	SEC24C	13|8|13	34	11.33	3	4|2|7|4|5|4|1|0|0|0|3|3|4|5|0|0	0.92	0.99	0.92	0.99	0.92	4.32	0
F508_O	LMNB2	LMNB2	38|45|20	103	34.33	3	11|0|2|3|0|3|10|11|5|6|1|0|2|0|0|0	0.99	1	0.99	1	0.99	10.17	0
F508_O	IDI1	IDI1	15|20|28	63	21	3	2|1|0|0|0|2|4|4|2|1|4|6|3|2|0|1	1	1	1	1	1	10.5	0
F508_O	GPRC5C	GPRC5C	18|13|3	34	11.33	3	0|0|0|0|0|0|0|0|0|0|0|0|0|0|0|0	1	1	1	1	1	113.33	0
F508_O	LRRC59	LRRC59	50|58|55	163	54.33	3	27|1|13|12|14|12|34|31|18|16|12|10|12|13|16|14	0.77	0.97	0.77	0.97	0.77	3.41	0.01
F508_O	DARS2	DARS2	43|40|48	131	43.67	3	4|0|5|10|11|10|2|5|3|3|4|5|5|9|3|0	1	1	1	1	1	8.84	0
F508_O	ABCB7	ABCB7	15|8|10	33	11	3	3|2|3|0|3|1|0|0|0|1|0|0|0|0|0|0	1	1	1	1	1	13.54	0
F508_O	AGPS	AGPS	8|10|8	26	8.67	3	4|0|0|0|0|0|0|0|0|0|0|0|0|1|0|2	1	1	1	1	1	19.81	0
F508_O	AK1	AK1	18|13|13	44	14.67	3	5|1|1|3|1|2|2|0|0|2|3|2|3|3|0|0	1	1	1	1	1	8.38	0
F508_O	ATP1B3	ATP1B3	33|20|25	78	26	3	7|0|3|4|3|1|2|2|2|1|0|2|0|0|0|1	1	1	1	1	1	14.86	0
F508_O	ATP5O	ATP5O	60|55|55	170	56.67	3	16|6|12|12|11|16|6|5|4|5|6|5|11|13|0|0	1	1	1	1	1	7.08	0
F508_O	CBR1	CBR1	8|8|10	26	8.67	3	2|1|0|0|0|0|0|0|1|1|0|0|0|0|2|3	1	1	1	1	1	13.87	0
F508_O	COX4I1	COX4I1	25|25|15	65	21.67	3	4|0|1|0|0|1|4|5|2|2|1|1|2|1|0|1	1	1	1	1	1	13.87	0
F508_O	CSTB	CSTB	28|25|20	73	24.33	3	4|0|5|3|3|3|9|6|0|0|4|4|2|3|2|2	1	1	1	1	1	7.79	0
F508_O	RRP1	RRP1	8|10|10	28	9.33	3	1|0|0|0|0|0|0|1|0|2|0|0|0|0|0|0	1	1	1	1	1	37.33	0
F508_O	DPM1	DPM1	28|23|45	96	32	3	16|8|0|4|7|6|9|7|7|5|9|7|14|9|8|7	0.97	1	0.97	1	0.97	4.16	0
F508_O	EIF2B1	EIF2B1	15|5|13	33	11	3	4|0|0|4|4|0|0|2|0|0|3|4|3|0|1|0	0.93	1	0.93	1	0.93	7.04	0
F508_O	EIF2S3	EIF2S3	48|38|33	119	39.67	3	13|2|12|13|8|13|14|16|17|14|7|10|9|5|8|15	0.99	1	0.99	1	0.99	3.61	0
F508_O	ETFB	ETFB	13|15|10	38	12.67	3	2|0|0|0|0|0|0|1|1|2|1|1|1|0|1|1	1	1	1	1	1	18.42	0
F508_O	FKBP4	FKBP4	53|48|63	164	54.67	3	12|3|11|11|15|7|10|7|8|8|6|8|10|12|5|4	1	1	1	1	1	6.38	0
F508_O	HADHB	HADHB	33|33|45	111	37	3	0|0|0|1|2|0|3|2|0|4|0|2|1|1|0|3	1	1	1	1	1	31.16	0
F508_O	HMGB1	HMGB1	15|15|5	35	11.67	3	5|1|0|0|0|0|4|2|2|3|0|0|0|0|5|6	0.9	1	0.9	1	0.9	6.67	0.01
F508_O	HPRT1	HPRT1	33|28|20	81	27	3	4|2|4|3|6|4|8|5|1|1|5|2|5|3|0|0	1	1	1	1	1	8.15	0
F508_O	DNAJA1	DNAJA1	35|38|45	118	39.33	3	14|4|11|6|7|6|13|8|11|9|8|5|10|8|7|12	1	1	1	1	1	4.53	0
F508_O	KPNA2	KPNA2	58|30|35	123	41	3	21|8|13|7|10|7|3|3|1|2|8|3|7|9|12|11	0.99	1	0.99	1	0.99	5.25	0
F508_O	MAD2L1	MAD2L1	8|10|8	26	8.67	3	1|0|1|3|2|1|3|1|5|7|0|0|1|2|0|0	0.96	0.98	0.96	0.98	0.96	5.14	0
F508_O	PHB	PHB	108|108|93	309	103	3	33|15|24|24|26|25|29|17|19|17|47|42|38|36|17|17	1	1	1	1	1	3.87	0
F508_O	PTPN1	PTPN1	65|60|58	183	61	3	17|0|4|1|5|2|8|5|11|18|5|7|7|7|14|11	1	1	1	1	1	8	0
F508_O	RCN1	RCN1	15|13|8	36	12	3	1|0|1|0|1|0|0|0|0|0|0|0|0|1|0|0	1	1	1	1	1	48	0
F508_O	RPL26	RPL26	25|23|23	71	23.67	3	9|0|7|8|8|8|9|8|9|8|11|12|13|12|9|12	0.93	0.99	0.93	0.99	0.93	2.65	0
F508_O	RPL27A	RPL27A	20|23|30	73	24.33	3	8|0|6|5|8|7|7|9|5|4|10|9|11|11|7|6	0.99	1	0.99	1	0.99	3.45	0
F508_O	RPL38	RPL38	38|35|48	121	40.33	3	13|0|11|9|6|9|6|9|3|3|15|18|14|14|7|7	1	1	1	1	1	4.48	0
F508_O	RPN1	RPN1	80|78|65	223	74.33	3	29|5|22|18|21|9|20|22|25|20|20|29|22|20|17|13	1	1	1	1	1	3.81	0
F508_O	RPS11	RPS11	33|35|38	106	35.33	3	10|2|10|8|10|13|9|9|10|14|8|10|10|7|5|6	1	1	1	1	1	4.01	0
F508_O	RPS13	RPS13	55|60|53	168	56	3	11|5|11|6|15|11|11|8|0|0|16|13|16|16|4|4	1	1	1	1	1	6.1	0
F508_O	RPS15	RPS15	93|80|125	298	99.33	3	28|29|19|14|17|15|41|41|18|27|15|12|14|17|4|6	1	1	1	1	1	5.01	0
F508_O	RPS16	RPS16	75|83|63	221	73.67	3	22|3|19|20|16|21|24|19|19|21|30|32|30|28|9|12	0.89	1	0.89	1	0.89	3.63	0.01
F508_O	RPS19	RPS19	38|30|23	91	30.33	3	7|0|7|5|6|6|5|4|2|1|8|5|8|8|4|4	1	1	1	1	1	6.07	0
F508_O	RPS21	RPS21	23|25|18	66	22	3	4|4|4|2|4|6|7|7|8|7|4|5|5|6|5|5	1	1	1	1	1	4.24	0
F508_O	RPS28	RPS28	33|33|23	89	29.67	3	6|0|6|3|6|3|10|11|5|6|6|7|6|7|4|4	1	1	1	1	1	5.27	0
F508_O	RRM1	RRM1	28|30|30	88	29.33	3	1|0|0|0|0|0|1|0|2|2|0|3|1|2|0|0	1	1	1	1	1	39.11	0
F508_O	STX10	STX10	18|20|13	51	17	3	0|0|0|0|0|0|0|0|0|3|0|0|0|0|0|0	1	1	1	1	1	90.67	0
F508_O	HSP90B1	HSP90B1	83|83|63	229	76.33	3	23|3|15|16|25|20|11|12|4|5|35|32|35|32|2|2	0.95	1	0.95	1	0.95	4.49	0
F508_O	TTC1	TTC1	13|18|13	44	14.67	3	2|1|0|0|0|1|2|3|4|4|2|1|0|2|2|1	1	1	1	1	1	9.39	0
F508_O	UMPS	UMPS	10|8|10	28	9.33	3	1|0|0|1|0|0|0|0|0|0|0|1|0|0|0|2	1	1	1	1	1	29.87	0
F508_O	VRK1	VRK1	28|30|25	83	27.67	3	15|6|3|5|2|0|17|10|6|7|5|6|4|4|1|3	0.99	1	0.99	1	0.99	4.71	0
F508_O	YARS	YARS	63|68|70	201	67	3	23|6|16|24|24|20|19|16|15|18|32|29|26|32|4|6	0.89	0.99	0.89	0.99	0.89	3.46	0.01
F508_O	CSTF3	CSTF3	10|5|8	23	7.67	3	1|0|0|0|1|0|0|0|2|3|0|0|2|0|0|1	0.99	1	0.99	1	0.99	12.27	0
F508_O	EMD	EMD	110|120|108	338	112.67	3	16|11|14|16|11|13|15|15|21|22|10|10|14|11|15|14	1	1	1	1	1	7.91	0
F508_O	C19orf63	C19orf63	28|30|20	78	26	3	0|0|0|0|0|0|0|0|0|0|0|0|0|0|0|0	1	1	1	1	1	260	0
F508_O	RHOG	RHOG	5|5|5	15	5	3	2|0|2|0|1|0|0|0|1|1|0|0|1|0|0|0	1	1	1	1	1	10	0
F508_O	UQCRC1	UQCRC1	25|10|13	48	16	3	3|0|1|0|0|2|0|0|0|0|2|4|5|6|0|0	0.99	1	0.99	1	0.99	11.13	0
F508_O	IARS2	IARS2	18|15|10	43	14.33	3	4|3|3|2|3|4|4|6|5|5|0|0|2|0|0|0	0.99	1	0.99	1	0.99	5.59	0
F508_O	ARHGAP1	ARHGAP1	40|38|38	116	38.67	3	2|0|0|0|0|2|2|4|9|9|0|0|0|0|7|7	1	1	1	1	1	14.73	0
F508_O	BAG2	BAG2	18|20|18	56	18.67	3	5|1|12|5|6|3|2|5|5|6|5|4|3|6|6|5	1	1	1	1	1	3.78	0
F508_O	COX6C	COX6C	5|5|5	15	5	3	0|0|0|0|0|0|0|0|0|0|0|0|0|0|0|0	1	1	1	1	1	50	0
F508_O	EFNB1	EFNB1	8|13|8	29	9.67	3	0|0|0|0|0|0|1|0|3|0|0|0|0|0|0|0	1	1	1	1	1	38.67	0
F508_O	EIF2S1	EIF2S1	20|25|40	85	28.33	3	9|3|4|4|6|3|12|12|8|9|5|4|8|5|4|7	0.99	1	0.99	1	0.99	4.4	0
F508_O	NDUFA10	NDUFA10	33|18|20	71	23.67	3	7|3|6|3|8|6|5|1|0|0|10|12|12|10|7|9	0.84	1	0.84	1	0.84	3.82	0.01
F508_O	NDUFS3	NDUFS3	33|25|43	101	33.67	3	10|3|5|2|3|6|3|4|2|4|7|5|10|6|3|6	1	1	1	1	1	6.82	0
F508_O	SLC9A3R1	SLC9A3R1	20|23|10	53	17.67	3	1|0|0|0|0|0|0|1|1|1|0|0|0|0|3|5	1	1	1	1	1	23.56	0
F508_O	STX8	STX8	5|13|13	31	10.33	3	0|0|0|0|0|0|0|0|0|0|0|0|0|0|4|3	0.99	1	0.99	1	0.99	23.62	0
F508_O	ATP6V1H	ATP6V1H	15|8|18	41	13.67	3	8|3|3|7|3|4|3|2|4|4|2|1|2|3|2|2	0.84	1	0.84	1	0.84	4.13	0.01
F508_O	NDUFA5	NDUFA5	13|8|20	41	13.67	3	7|0|4|5|2|1|0|0|0|0|2|2|8|6|2|0	0.93	1	0.93	1	0.93	5.61	0
F508_O	RPL7L1	RPL7L1	18|25|23	66	22	3	9|5|5|5|4|3|5|6|1|3|8|5|6|8|5|5	1	1	1	1	1	4.24	0
F508_O	DNAJA2	DNAJA2	40|40|40	120	40	3	14|7|6|12|4|3|11|10|21|18|7|12|9|7|10|9	1	1	1	1	1	4	0
F508_O	LMAN1	LMAN1	10|10|13	33	11	3	2|0|1|0|0|0|0|0|1|0|0|0|2|0|2|0	1	1	1	1	1	22	0
F508_O	PDIA6	PDIA6	100|118|98	316	105.33	3	33|15|27|13|21|21|12|9|4|3|15|11|16|14|12|10	1	1	1	1	1	7.14	0
F508_O	NAMPT	NAMPT	80|90|120	290	96.67	3	40|16|26|21|21|25|19|22|15|15|28|27|30|32|13|12	1	1	1	1	1	4.27	0
F508_O	STX6	STX6	13|8|20	41	13.67	3	0|0|0|0|0|0|0|0|0|0|0|0|0|0|0|0	1	1	1	1	1	136.67	0
F508_O	ADCY9	ADCY9	20|15|45	80	26.67	3	0|0|0|0|0|0|0|0|0|0|0|0|0|0|0|0	1	1	1	1	1	266.67	0
F508_O	ATP5H	ATP5H	65|45|65	175	58.33	3	16|9|5|11|8|10|6|7|0|0|7|10|9|9|0|0	1	1	1	1	1	8.72	0
F508_O	CLPP	CLPP	18|8|8	34	11.33	3	5|0|6|0|7|3|0|0|1|0|4|5|3|3|1|0	0.9	1	0.9	1	0.9	4.77	0.01
F508_O	MAT2A	MAT2A	25|33|28	86	28.67	3	6|0|10|7|8|6|3|5|2|2|4|5|5|9|0|0	1	1	1	1	1	6.37	0
F508_O	COX4NB	COX4NB	83|83|83	249	83	3	1|0|0|1|0|0|0|1|0|0|1|1|0|0|2|0	1	1	1	1	1	189.71	0
F508_O	FKBP8	FKBP8	30|38|15	83	27.67	3	7|0|6|0|5|7|2|4|2|2|3|1|1|0|0|1	1	1	1	1	1	10.8	0
F508_O	PSMD4	PSMD4	38|33|40	111	37	3	15|5|11|10|11|6|8|8|14|17|10|15|15|12|10|11	1	1	1	1	1	3.33	0
F508_O	ARL6IP5	ARL6IP5	50|60|78	188	62.67	3	9|1|6|3|3|2|4|2|3|3|0|0|0|0|2|2	1	1	1	1	1	25.07	0
F508_O	HELZ	HELZ	15|13|15	43	14.33	3	3|1|5|8|5|6|3|1|4|4|2|5|4|8|1|0	0.99	0.99	0.99	0.99	0.99	3.82	0
F508_O	MRPL14	MRPL14	10|5|5	20	6.67	3	1|0|1|0|0|1|0|0|0|0|0|0|0|0|0|0	1	1	1	1	1	35.56	0
F508_O	STUB1	STUB1	50|50|50	150	50	3	6|5|12|10|10|9|3|5|11|12|4|6|8|6|5|6	1	1	1	1	1	6.78	0
F508_O	WDR18	WDR18	15|10|15	40	13.33	3	4|0|2|0|0|0|8|5|6|6|3|2|1|3|0|0	0.97	0.99	0.97	0.99	0.97	5.33	0
F508_O	STEAP3	STEAP3	20|15|13	48	16	3	0|0|0|0|0|0|0|0|1|1|0|1|0|1|0|0	1	1	1	1	1	64	0
F508_O	CISD2	CISD2	35|30|23	88	29.33	3	2|0|0|0|0|0|0|1|0|0|1|0|0|0|0|0	1	1	1	1	1	117.33	0
F508_O	PGRMC1	PGRMC1	30|45|30	105	35	3	12|4|10|6|5|7|10|7|3|4|16|12|15|11|2|5	1	1	1	1	1	4.34	0
F508_O	SCAMP2	SCAMP2	8|5|10	23	7.67	3	1|0|0|0|0|0|0|0|0|0|0|0|0|0|0|0	1	1	1	1	1	76.67	0
F508_O	YKT6	YKT6	123|103|123	349	116.33	3	25|2|8|4|6|8|35|34|22|29|9|9|12|12|38|40	1	1	1	1	1	6.35	0
F508_O	STIP1	STIP1	43|40|45	128	42.67	3	7|0|6|6|6|3|5|4|9|12|13|11|9|11|8|6	1	1	1	1	1	5.89	0
F508_O	RPSA	RPSA	38|53|43	134	44.67	3	11|1|6|7|11|7|12|8|10|10|7|4|6|4|9|8	1	1	1	1	1	5.91	0
F508_O	CHP	CHP	13|10|10	33	11	3	0|0|0|0|0|0|0|0|0|0|0|0|0|0|0|0	1	1	1	1	1	110	0
F508_O	PRAF2	PRAF2	30|30|38	98	32.67	3	2|0|3|0|1|2|0|0|0|0|1|1|1|3|0|0	1	1	1	1	1	37.33	0
F508_O	SEC63	SEC63	40|35|33	108	36	3	8|0|0|0|2|3|6|2|1|1|5|4|3|4|10|8	1	1	1	1	1	10.11	0
F508_O	SLC3A2	SLC3A2	65|63|70	198	66	3	3|1|1|1|0|0|2|2|0|2|0|0|0|0|4|2	1	1	1	1	1	58.67	0
F508_O	RABL3	RABL3	15|13|20	48	16	3	0|0|0|0|0|0|0|0|3|2|0|0|0|0|0|0	1	1	1	1	1	51.2	0
F508_O	VMA21	VMA21	33|33|25	91	30.33	3	0|0|0|0|0|0|0|0|1|1|0|0|0|0|0|0	1	1	1	1	1	242.67	0
F508_O	IMPDH2	IMPDH2	28|30|35	93	31	3	3|0|5|5|5|4|1|4|1|0|2|2|6|5|0|2	1	1	1	1	1	11.02	0
F508_O	FDFT1	FDFT1	18|10|20	48	16	3	0|0|0|0|0|1|0|0|0|0|0|0|0|0|1|1	1	1	1	1	1	85.33	0
F508_O	LETM1	LETM1	20|5|5	30	10	3	0|0|0|0|0|0|0|0|0|0|0|0|0|0|0|0	1	1	1	1	1	100	0
F508_O	PEF1	PEF1	8|10|15	33	11	3	5|4|2|0|1|0|5|5|0|1|3|4|4|4|0|0	0.95	1	0.95	1	0.95	4.63	0
F508_O	PGLS	PGLS	8|18|3	29	9.67	3	0|0|0|0|0|0|2|0|0|0|0|0|1|0|0|0	1	1	1	1	1	51.56	0
F508_O	PREB	PREB	88|70|83	241	80.33	3	6|0|0|0|0|0|0|2|0|5|0|0|0|0|0|1	1	1	1	1	1	91.81	0
F508_O	ARFIP1	ARFIP1	18|18|28	64	21.33	3	5|0|2|2|4|3|8|8|10|12|2|2|3|3|4|2	0.99	1	0.99	1	0.99	4.88	0
F508_O	CLPX	CLPX	18|18|20	56	18.67	3	6|1|0|4|4|4|2|3|2|2|4|0|0|2|0|0	1	1	1	1	1	8.78	0
F508_O	STOML2	STOML2	40|35|43	118	39.33	3	17|9|7|13|6|9|4|8|1|1|10|9|9|9|0|1	1	1	1	1	1	5.57	0
F508_O	HNRNPH2	HNRNPH2	58|60|55	173	57.67	3	17|12|26|21|17|18|1|10|0|11|12|15|12|15|0|0	1	1	1	1	1	4.93	0
F508_O	SAR1B	SAR1B	28|23|28	79	26.33	3	3|0|0|0|0|0|0|0|0|0|0|0|0|0|0|0	1	1	1	1	1	140.44	0
F508_O	GNPAT	GNPAT	10|10|13	33	11	3	3|5|4|3|4|2|0|2|3|2|1|0|0|1|0|0	1	1	1	1	1	5.87	0
F508_O	DIMT1	DIMT1	13|15|18	46	15.33	3	2|0|2|2|5|2|6|1|0|0|5|2|3|0|2|0	1	1	1	1	1	7.67	0
F508_O	MTCH2	MTCH2	23|18|15	56	18.67	3	9|8|8|10|10|8|0|0|1|0|2|0|0|3|0|3	0.96	0.99	0.96	0.99	0.96	4.82	0
F508_O	SEC11A	SEC11A	25|33|18	76	25.33	3	4|5|6|0|0|0|5|1|3|4|0|0|0|2|2|3	1	1	1	1	1	11.58	0
F508_O	TTC35	TTC35	153|120|133	406	135.33	3	3|5|0|0|0|0|0|0|3|5|2|0|0|1|2|2	1	1	1	1	1	94.14	0
F508_O	PSMD6	PSMD6	23|28|35	86	28.67	3	10|2|2|7|6|2|4|5|7|7|2|5|6|6|4|4	1	1	1	1	1	5.81	0
F508_O	RAB21	RAB21	20|18|35	73	24.33	3	11|3|6|5|4|5|3|7|12|12|7|7|6|6|3|1	0.94	1	0.94	1	0.94	3.97	0
F508_O	MLEC	MLEC	13|18|15	46	15.33	3	10|0|2|0|2|3|0|1|0|0|2|4|8|5|0|2	0.98	0.99	0.98	0.99	0.98	6.29	0
F508_O	LPGAT1	LPGAT1	13|5|13	31	10.33	3	1|1|0|0|0|0|2|1|2|0|0|0|0|0|0|0	1	1	1	1	1	23.62	0
F508_O	NSA2	NSA2	8|5|10	23	7.67	3	2|0|0|0|0|0|1|1|1|2|3|3|3|1|2|2	0.97	1	0.97	1	0.97	5.84	0
F508_O	TXNDC12	TXNDC12	15|18|20	53	17.67	3	7|0|2|1|0|0|6|2|0|0|0|0|0|0|0|0	1	1	1	1	1	15.7	0
F508_O	HSD17B12	HSD17B12	50|40|45	135	45	3	18|8|6|4|6|7|7|7|10|11|20|19|19|15|11|12	1	1	1	1	1	4	0
F508_O	TMEM85	TMEM85	33|30|40	103	34.33	3	0|0|0|0|0|0|0|0|0|0|0|0|0|0|0|0	1	1	1	1	1	343.33	0
F508_O	C8orf55	C8orf55	20|13|15	48	16	3	0|0|1|2|3|1|0|0|0|0|4|3|2|4|0|1	1	1	1	1	1	12.19	0
F508_O	DHRS7	DHRS7	43|40|65	148	49.33	3	0|0|0|0|0|0|0|0|0|0|0|0|0|0|2|3	1	1	1	1	1	157.87	0
F508_O	COPZ1	COPZ1	15|18|10	43	14.33	3	6|5|3|6|5|7|3|5|4|4|4|2|1|6|5|2	0.77	1	0.77	1	0.77	3.37	0.01
F508_O	DNAJB11	DNAJB11	13|13|13	39	13	3	2|0|0|0|0|0|0|0|1|1|0|1|0|1|0|1	1	1	1	1	1	29.71	0
F508_O	FAM134B	FAM134B	5|8|13	26	8.67	3	0|0|0|0|0|0|0|0|0|0|0|0|0|0|0|0	1	1	1	1	1	86.67	0
F508_O	ACOT9	ACOT9	43|33|40	116	38.67	3	14|9|7|4|7|8|6|2|3|2|8|5|9|7|2|1	1	1	1	1	1	6.58	0
F508_O	SRSF5	SRSF5	10|10|10	30	10	3	2|0|0|1|0|0|0|0|0|0|0|0|0|0|0|0	1	1	1	1	1	53.33	0
F508_O	AGK	AGK	18|18|13	49	16.33	3	8|2|9|7|8|8|4|5|0|1|1|1|4|6|3|5	0.9	0.99	0.9	0.99	0.9	3.63	0.01
F508_O	CHCHD3	CHCHD3	5|5|3	13	4.33	3	1|0|0|0|0|0|1|0|0|0|1|1|1|1|0|0	0.99	1	0.99	1	0.99	11.56	0
F508_O	TMEM111	TMEM111	103|108|83	294	98	3	3|1|0|0|0|0|1|0|7|4|1|0|0|1|2|1	1	1	1	1	1	74.67	0
F508_O	CDKAL1	CDKAL1	30|25|43	98	32.67	3	6|1|2|0|1|2|4|3|9|6|0|0|0|0|5|6	1	1	1	1	1	11.61	0
F508_O	YARS2	YARS2	20|18|25	63	21	3	13|8|4|2|5|4|2|7|5|3|7|3|3|3|2|0	0.99	1	0.99	1	0.99	4.73	0
F508_O	CNP	CNP	15|13|15	43	14.33	3	4|0|4|5|2|0|1|1|2|0|0|3|2|4|3|0	1	1	1	1	1	7.4	0
F508_O	TMED10	TMED10	25|30|23	78	26	3	5|1|1|1|0|0|2|3|3|2|1|3|2|4|0|0	1	1	1	1	1	14.86	0
F508_O	C15orf24	C15orf24	70|75|68	213	71	3	1|0|0|0|0|0|0|0|0|0|0|0|0|0|0|0	1	1	1	1	1	710	0
F508_O	TOMM22	TOMM22	78|83|88	249	83	3	39|19|12|24|38|33|22|15|19|26|22|18|23|24|19|27	1	1	1	1	1	3.49	0
F508_O	SMPD4	SMPD4	10|8|23	41	13.67	3	0|0|0|0|0|0|1|0|0|0|0|0|0|0|2|0	1	1	1	1	1	72.89	0
F508_O	PPIA	PPIA	50|38|40	128	42.67	3	9|1|13|9|13|13|14|14|14|16|14|10|15|11|6|8	1	1	1	1	1	3.79	0
F508_O	GNAS	GNAS	33|28|23	84	28	3	7|0|2|3|5|4|5|5|5|3|3|5|6|7|10|6	1	1	1	1	1	5.89	0
F508_O	GNAI3	GNAI3	8|5|3	16	5.33	3	2|0|0|1|0|0|0|0|0|0|0|0|0|0|0|0	0.99	1	0.99	1	0.99	28.44	0
F508_O	MYH10	MYH10	45|45|45	135	45	3	0|0|4|5|0|0|0|0|0|0|0|0|0|0|0|0	1	1	1	1	1	80	0
F508_O	AAAS	AAAS	25|23|23	71	23.67	3	2|0|3|2|5|2|2|4|1|2|0|2|2|2|1|2	1	1	1	1	1	11.83	0
F508_O	TUBB2A	TUBB2A	3|63|45	111	37	3	0|0|0|0|0|0|0|0|0|0|2|2|0|1|0|0	0.99	1	0.99	1	0.99	118.4	0
F508_O	MST4	MST4	15|15|25	55	18.33	3	1|1|1|1|5|7|2|1|2|5|4|5|4|3|1|0	1	1	1	1	1	6.82	0
F508_O	HSP90AA1	HSP90AA1	265|273|245	783	261	3	83|7|70|63|57|66|70|74|38|34|67|62|72|62|35|31	1	1	1	1	1	4.69	0
F508_O	RPL13	RPL13	30|33|45	108	36	3	8|5|11|13|11|10|9|8|7|6|16|21|15|14|10|8	0.92	1	0.92	1	0.92	3.35	0
F508_O	SLC25A4	SLC25A4	30|23|40	93	31	3	4|2|3|2|5|3|2|6|0|0|4|3|4|3|4|0	1	1	1	1	1	11.02	0
F508_O	ITPA	ITPA	15|18|8	41	13.67	3	4|0|0|0|3|1|1|0|1|3|0|2|1|0|0|0	1	1	1	1	1	13.67	0
F508_O	PDHB	PDHB	28|20|28	76	25.33	3	12|2|6|7|8|6|8|10|7|2|7|6|8|7|5|5	1	1	1	1	1	3.82	0
F508_O	NPEPPS	NPEPPS	73|73|93	239	79.67	3	28|5|9|9|12|15|13|14|10|11|12|15|11|10|16|16	1	1	1	1	1	6.19	0
F508_O	UBE2K	UBE2K	13|10|15	38	12.67	3	0|0|0|0|0|0|0|0|0|0|0|0|0|0|0|0	1	1	1	1	1	126.67	0
F508_O	TRIM13	TRIM13	55|53|48	156	52	3	0|0|0|0|0|0|0|0|0|0|0|0|0|0|0|0	1	1	1	1	1	520	0
F508_O	SCAMP3	SCAMP3	25|13|23	61	20.33	3	3|0|3|1|2|3|0|0|0|3|0|3|3|3|4|4	1	1	1	1	1	10.17	0
F508_O	TACC1	TACC1	33|30|33	96	32	3	14|0|7|7|8|10|2|3|7|9|6|3|1|4|10|11	1	1	1	1	1	5.02	0
F508_O	ABCB10	ABCB10	13|5|8	26	8.67	3	4|0|1|2|2|2|0|0|1|1|0|0|0|0|0|2	0.98	1	0.98	1	0.98	9.24	0
F508_O	TSFM	TSFM	18|20|10	48	16	3	10|0|6|0|7|6|2|3|0|1|9|4|3|9|0|0	0.82	0.99	0.82	0.99	0.82	4.27	0.01
F508_O	VAMP2	VAMP2	30|33|15	78	26	3	1|0|0|2|0|0|0|0|7|8|5|5|4|2|12|8	0.99	1	0.99	1	0.99	7.7	0
F508_O	VAMP3	VAMP3	30|53|23	106	35.33	3	13|0|5|0|3|5|7|7|14|13|6|5|6|6|8|11	0.98	1	0.98	1	0.98	5.19	0
F508_O	DNAJB6	DNAJB6	18|15|20	53	17.67	3	3|0|1|1|5|4|2|2|1|0|2|2|1|2|4|2	1	1	1	1	1	8.83	0
F508_O	MYL6	MYL6	23|20|23	66	22	3	7|4|9|6|2|3|2|0|3|0|3|6|3|4|2|2	1	1	1	1	1	6.29	0
F508_O	RBM28	RBM28	8|5|13	26	8.67	3	4|0|0|1|1|0|1|2|1|1|2|3|3|4|0|1	0.95	1	0.95	1	0.95	5.78	0
F508_O	GK	GK	13|10|10	33	11	3	2|0|0|0|0|0|2|0|0|0|0|2|1|0|0|0	1	1	1	1	1	25.14	0
F508_O	RAB11B	RAB11B	43|33|38	114	38	3	4|0|3|3|3|1|4|2|0|0|4|0|5|4|4|7	1	1	1	1	1	13.82	0
F508_O	TEX264	TEX264	20|10|18	48	16	3	0|0|0|0|0|0|0|0|0|0|0|0|0|0|0|1	1	1	1	1	1	160	0
F508_O	SLC9A3R2	SLC9A3R2	38|30|30	98	32.67	3	0|0|0|0|0|0|0|0|0|0|0|0|0|0|0|0	1	1	1	1	1	326.67	0
F508_O	VRK2	VRK2	43|43|58	144	48	3	2|0|0|0|0|0|0|0|5|5|0|0|0|0|5|4	1	1	1	1	1	36.57	0
F508_O	ITGB1	ITGB1	50|38|35	123	41	3	3|0|0|0|0|0|1|0|1|1|0|0|0|0|3|2	1	1	1	1	1	59.64	0
F508_O	RAB14	RAB14	33|33|38	104	34.67	3	13|3|9|7|15|12|3|4|2|3|7|9|7|12|6|9	1	1	1	1	1	4.58	0
F508_O	RAB34	RAB34	15|23|23	61	20.33	3	2|3|2|1|1|1|2|4|0|0|0|0|1|2|0|3	1	1	1	1	1	14.79	0
F508_O	SLC25A10	SLC25A10	33|30|30	93	31	3	6|6|2|3|5|5|8|2|3|9|1|3|0|2|3|1	1	1	1	1	1	8.41	0
F508_O	RHOT2	RHOT2	15|10|13	38	12.67	3	2|1|1|2|0|2|2|3|4|5|2|2|1|2|1|0	1	1	1	1	1	6.76	0
F508_O	RHOA	RHOA	38|20|20	78	26	3	3|2|1|2|0|2|5|2|5|3|2|5|5|6|1|1	1	1	1	1	1	9.24	0
F508_O	RAP2C	RAP2C	8|3|3	14	4.67	3	5|0|0|0|0|0|0|1|0|0|0|0|0|0|0|0	0.97	0.99	0.97	0.99	0.97	12.44	0
F508_O	NUP93	NUP93	35|43|38	116	38.67	3	23|5|7|6|16|9|9|14|9|9|18|14|12|15|16|17	0.83	1	0.83	1	0.83	3.11	0.01
F508_O	TMEM2	TMEM2	13|18|23	54	18	3	0|0|0|0|0|0|0|0|0|0|0|0|0|0|0|0	1	1	1	1	1	180	0
F508_O	ISOC2	ISOC2	50|40|58	148	49.33	3	5|3|7|9|4|5|4|2|0|0|12|9|9|9|0|0	1	1	1	1	1	10.12	0
F508_O	EHD4	EHD4	8|5|8	21	7	3	0|0|0|1|1|0|1|0|3|5|1|3|1|1|1|1	0.96	0.99	0.96	0.99	0.96	5.89	0
F508_O	SLC25A11	SLC25A11	55|55|85	195	65	3	26|6|19|20|20|19|16|22|14|14|27|23|20|21|10|10	0.99	1	0.99	1	0.99	3.62	0
F508_O	ATP1A1	ATP1A1	108|128|95	331	110.33	3	34|12|18|13|8|7|16|14|11|17|11|12|14|12|15|19	1	1	1	1	1	7.58	0
F508_O	ANO6	ANO6	13|8|5	26	8.67	3	0|0|0|0|0|0|0|0|0|0|0|0|0|0|0|0	1	1	1	1	1	86.67	0
F508_O	SLC6A8	SLC6A8	48|45|25	118	39.33	3	0|0|0|0|0|0|1|1|1|0|0|0|0|0|2|2	1	1	1	1	1	89.9	0
F508_O	KIAA0090	KIAA0090	405|405|445	1255	418.33	3	16|5|1|2|4|4|6|5|5|10|0|5|0|5|4|4	1	1	1	1	1	88.07	0
F508_O	AIFM1	AIFM1	25|23|18	66	22	3	3|0|0|0|0|0|1|2|6|5|2|2|1|1|10|5	1	1	1	1	1	9.26	0
F508_O	TMEM199	TMEM199	8|13|8	29	9.67	3	0|0|0|0|0|0|0|0|0|0|0|0|0|0|0|0	1	1	1	1	1	96.67	0
F508_O	MOSPD2	MOSPD2	8|8|5	21	7	3	0|0|0|0|0|0|0|0|0|0|0|0|0|0|0|0	1	1	1	1	1	70	0
F508_O	HM13	HM13	30|33|23	86	28.67	3	11|0|3|1|3|3|3|1|0|3|8|8|5|5|3|4	1	1	1	1	1	7.52	0
F508_O	SRPR	SRPR	60|53|58	171	57	3	9|5|6|7|5|6|11|10|12|9|7|10|4|7|3|2	1	1	1	1	1	8.07	0
F508_O	SFXN1	SFXN1	65|63|60	188	62.67	3	31|12|18|15|21|24|14|11|15|14|26|28|29|25|8|8	0.94	0.99	0.94	0.99	0.94	3.35	0
F508_O	SLC25A13	SLC25A13	83|68|80	231	77	3	42|22|16|24|21|24|20|17|19|21|16|16|11|16|19|16	1	1	1	1	1	3.85	0
F508_O	NUP155	NUP155	38|30|38	106	35.33	3	16|5|10|4|13|9|7|7|7|7|6|8|5|7|9|10	1	1	1	1	1	4.35	0
F508_O	RTN4	RTN4	48|35|35	118	39.33	3	21|7|10|10|17|8|10|14|10|12|12|7|9|13|14|13	1	1	1	1	1	3.37	0
F508_O	ATP2A2	ATP2A2	150|150|143	443	147.67	3	65|29|40|33|24|22|47|43|38|44|44|49|50|54|18|18	1	1	1	1	1	3.82	0
F508_O	HLA-A	HLA-A	23|20|8	51	17	3	0|0|0|0|0|0|1|3|1|0|0|0|0|0|2|0	1	1	1	1	1	38.86	0
F508_O	HLA-C	HLA-C	5|8|8	21	7	3	0|0|0|0|0|0|0|0|0|0|0|0|0|0|0|0	1	1	1	1	1	70	0
F508_O	H2AFZ	H2AFZ	13|20|10	43	14.33	3	0|0|6|4|4|5|6|6|0|0|0|5|6|5|4|6	0.88	1	0.88	1	0.88	4.02	0.01
F508_O	PYGL	PYGL	28|28|53	109	36.33	3	14|8|8|6|9|9|2|1|6|10|10|10|10|13|2|1	1	1	1	1	1	4.89	0
F508_O	SLC37A4	SLC37A4	8|5|3	16	5.33	3	2|0|1|2|1|1|1|2|2|2|0|0|1|1|2|0	0.86	1	0.86	1	0.86	4.74	0.01
F508_O	ALDH1B1	ALDH1B1	8|8|20	36	12	3	5|3|5|3|3|2|1|2|2|2|3|1|1|4|0|1	0.96	1	0.96	1	0.96	5.05	0
F508_O	NOS1AP	NOS1AP	70|75|103	248	82.67	3	0|0|0|0|0|0|0|0|0|0|0|0|0|0|0|0	1	1	1	1	1	826.67	0
F508_O	LDHA	LDHA	50|38|25	113	37.67	3	21|9|8|6|9|8|6|4|6|7|8|7|15|10|5|4	0.93	1	0.93	1	0.93	4.53	0
F508_O	DNAJC7	DNAJC7	40|50|33	123	41	3	0|0|0|1|0|0|2|4|6|6|1|0|2|2|2|6	1	1	1	1	1	20.5	0
F508_O	CNDP2	CNDP2	13|18|28	59	19.67	3	3|4|2|1|0|0|3|0|2|1|0|3|0|1|3|0	1	1	1	1	1	13.68	0
F508_O	LMNA	LMNA	20|30|15	65	21.67	3	11|0|3|6|2|3|1|2|0|0|2|4|3|4|1|0	0.99	1	0.99	1	0.99	8.25	0
F508_O	ATAD3A	ATAD3A	65|53|43	161	53.67	3	16|0|7|12|7|6|9|6|5|6|13|15|13|12|7|6	1	1	1	1	1	6.13	0
F508_O	PDHA1	PDHA1	15|10|15	40	13.33	3	3|0|0|0|2|3|2|2|2|4|0|0|2|0|0|1	1	1	1	1	1	10.16	0
F508_O	ARL13B	ARL13B	20|30|13	63	21	3	0|0|0|0|0|0|0|1|2|1|0|0|0|0|0|0	1	1	1	1	1	84	0
F508_O	DNM2	DNM2	40|40|35	115	38.33	3	8|0|5|2|5|4|3|4|5|10|6|3|6|9|0|0	1	1	1	1	1	8.76	0
F508_O	TMEM87A	TMEM87A	8|3|5	16	5.33	3	0|0|0|0|0|0|0|0|0|0|0|0|0|0|0|2	1	1	1	1	1	42.67	0
F508_O	ACTBL2	ACTBL2	3|3|8	14	4.67	3	4|0|0|1|1|1|0|0|0|2|0|0|2|2|2|1	0.81	1	0.81	1	0.81	4.67	0.01
F508_O	RPS10	RPS10	43|33|55	131	43.67	3	22|0|11|10|12|11|12|13|0|0|9|7|11|11|0|0	0.99	1	0.99	1	0.99	5.42	0
F508_O	PRDX5	PRDX5	13|8|18	39	13	3	0|0|1|1|1|1|0|0|0|0|0|0|0|2|0|0	1	1	1	1	1	34.67	0
F508_O	EPHA2	EPHA2	45|45|53	143	47.67	3	9|3|7|5|8|5|7|9|15|13|6|3|6|6|4|1	1	1	1	1	1	7.13	0
F508_O	SLC6A15	SLC6A15	43|45|48	136	45.33	3	1|0|1|0|1|1|2|6|10|7|0|0|0|0|3|2	1	1	1	1	1	21.33	0
F508_O	MTHFD1L	MTHFD1L	13|10|28	51	17	3	5|0|3|2|5|5|2|2|5|7|1|1|2|2|2|0	0.99	1	0.99	1	0.99	6.18	0
F508_O	TPD52L2	TPD52L2	15|20|18	53	17.67	3	5|1|1|3|4|2|6|6|8|0|5|7|4|8|11|7	0.95	1	0.95	1	0.95	3.62	0
F508_O	PRPSAP2	PRPSAP2	15|15|15	45	15	3	6|2|1|0|2|0|3|6|5|4|3|4|6|6|0|4	1	1	1	1	1	4.62	0
F508_O	LRBA	LRBA	155|130|203	488	162.67	3	10|4|45|37|51|39|15|18|27|27|33|44|39|41|19|23	1	1	1	1	1	5.51	0
F508_O	NBEA	NBEA	3|5|8	16	5.33	3	0|0|1|0|0|1|0|4|0|0|1|0|0|0|0|0	0.97	1	0.97	1	0.97	12.19	0
F508_O	RAP1B	RAP1B	5|8|18	31	10.33	3	5|3|4|2|1|3|0|0|0|0|4|5|0|5|0|1	0.8	1	0.8	1	0.8	5.01	0.01
F508_O	RAB5C	RAB5C	55|50|48	153	51	3	9|4|8|5|8|5|9|11|5|11|8|8|8|8|7|5	1	1	1	1	1	6.86	0
F508_O	RAB5A	RAB5A	18|15|18	51	17	3	7|0|4|0|3|2|7|8|6|0|7|6|4|0|4|3	0.99	1	0.99	1	0.99	4.46	0
F508_O	RAB5B	RAB5B	5|8|3	16	5.33	3	2|2|0|2|2|1|0|0|0|0|1|2|2|3|0|0	0.88	1	0.88	1	0.88	5.02	0.01
F508_O	ELAVL1	ELAVL1	38|38|48	124	41.33	3	16|0|11|9|10|15|18|18|10|18|16|14|15|18|14|7	0.89	1	0.89	1	0.89	3.16	0.01
F508_O	TOR1AIP1	TOR1AIP1	35|50|35	120	40	3	5|0|1|2|0|0|4|4|5|2|2|0|2|2|14|11	1	1	1	1	1	11.85	0
F508_O	UQCR10	UQCR10	8|10|8	26	8.67	3	3|0|2|1|3|2|2|4|1|1|3|4|5|4|2|2	0.95	0.99	0.95	0.99	0.95	3.56	0
F508_O	ACSL3	ACSL3	25|33|35	93	31	3	4|0|0|0|0|0|4|0|6|5|0|4|0|2|7|5	1	1	1	1	1	13.41	0
F508_O	ARF6	ARF6	23|23|25	71	23.67	3	6|3|5|5|6|3|3|6|7|5|3|6|2|4|3|5	1	1	1	1	1	5.26	0
F508_O	CXADR	CXADR	5|10|10	25	8.33	3	0|0|0|0|0|0|0|0|0|0|0|0|0|0|0|0	1	1	1	1	1	83.33	0
F508_O	DEK	DEK	25|28|28	81	27	3	12|0|4|1|3|5|1|2|7|8|3|4|5|3|8|7	1	1	1	1	1	5.92	0
F508_O	HSD17B4	HSD17B4	43|43|63	149	49.67	3	6|3|6|0|4|5|3|0|0|1|1|2|3|2|0|1	1	1	1	1	1	21.48	0
F508_O	SLC25A3	SLC25A3	90|105|85	280	93.33	3	22|12|15|12|16|6|19|24|16|14|17|20|15|16|5|6	1	1	1	1	1	6.35	0
F508_O	PSMC2	PSMC2	48|48|58	154	51.33	3	10|7|17|16|20|17|15|15|21|24|22|20|23|20|6|16	0.93	1	0.93	1	0.93	3.05	0
F508_O	RAB2A	RAB2A	23|23|28	74	24.67	3	8|0|9|4|6|6|6|7|4|7|6|6|6|7|4|5	1	1	1	1	1	4.34	0
F508_O	RPL18	RPL18	50|38|35	123	41	3	14|0|13|14|13|7|17|10|15|10|7|9|10|14|14|16	1	1	1	1	1	3.58	0
F508_O	RPL31	RPL31	45|40|45	130	43.33	3	9|1|6|10|11|10|12|12|12|6|11|11|11|13|9|9	1	1	1	1	1	4.53	0
F508_O	RPLP1	RPLP1	68|53|53	174	58	3	10|9|8|8|8|10|11|7|8|5|9|8|13|9|11|11	1	1	1	1	1	6.4	0
F508_O	SNX3	SNX3	18|13|18	49	16.33	3	2|0|0|0|0|0|1|3|4|3|0|0|0|0|3|3	1	1	1	1	1	13.75	0
F508_O	TFAM	TFAM	13|18|5	36	12	3	2|0|0|0|0|0|2|1|0|1|0|0|2|0|0|1	1	1	1	1	1	21.33	0
F508_O	UBE2N	UBE2N	25|25|23	73	24.33	3	6|0|5|3|5|3|3|6|2|2|3|4|4|4|2|1	1	1	1	1	1	7.35	0
F508_O	MCM3	MCM3	75|73|103	251	83.67	3	24|15|22|17|11|10|20|21|16|15|12|13|17|24|13|10	1	1	1	1	1	5.15	0
F508_O	ALDH3A2	ALDH3A2	63|50|80	193	64.33	3	16|7|11|9|13|11|19|27|23|20|18|16|12|15|10|12	1	1	1	1	1	4.31	0
F508_O	OAT	OAT	45|53|65	163	54.33	3	10|7|13|11|13|12|0|5|1|1|9|4|8|7|1|1	1	1	1	1	1	8.44	0
F508_O	ACP1	ACP1	5|5|3	13	4.33	3	0|0|0|0|0|0|0|0|0|0|0|0|0|0|0|0	1	1	1	1	1	43.33	0
F508_O	HSD17B10	HSD17B10	93|60|55	208	69.33	3	35|17|26|16|19|23|15|16|8|14|16|18|21|18|10|12	0.98	1	0.98	1	0.98	3.91	0
F508_O	VAPB	VAPB	20|25|20	65	21.67	3	9|4|2|3|5|4|5|9|7|9|6|5|3|4|11|11	1	1	1	1	1	3.57	0
F508_O	VAPA	VAPA	53|53|53	159	53	3	23|9|5|12|2|4|6|12|12|9|10|12|8|8|12|9	1	1	1	1	1	5.54	0
F508_O	ATP2B1	ATP2B1	23|23|33	79	26.33	3	9|3|0|0|3|6|0|2|3|5|0|0|6|5|1|0	1	1	1	1	1	9.8	0
F508_O	HIST1H1D	HIST1H1D	13|13|8	34	11.33	3	0|0|0|0|0|4|7|5|22|0|0|0|0|0|2|0	0.92	0.96	0.92	0.96	0.92	4.53	0
F508_O	SAE1	SAE1	28|28|20	76	25.33	3	10|11|7|5|3|2|14|14|12|9|5|8|8|4|6|6	0.77	1	0.77	1	0.77	3.27	0.01
F508_O	LMNB1	LMNB1	128|133|113	374	124.67	3	30|11|13|13|14|8|25|26|16|14|21|24|23|26|5|5	1	1	1	1	1	7.28	0
F508_O	SLC1A5	SLC1A5	65|55|115	235	78.33	3	20|8|15|18|18|18|8|17|24|20|17|18|18|20|13|14	1	1	1	1	1	4.71	0
F508_O	UQCRB	UQCRB	13|15|15	43	14.33	3	0|0|0|0|0|0|0|0|0|0|0|0|0|0|0|0	1	1	1	1	1	143.33	0
F508_O	EI24	EI24	5|8|8	21	7	3	0|0|0|0|0|0|0|0|0|0|0|0|0|0|1|0	1	1	1	1	1	70	0
F508_O	MXRA7	MXRA7	8|8|3	19	6.33	3	3|0|0|1|0|0|3|1|0|0|0|0|1|0|0|0	0.96	1	0.96	1	0.96	11.26	0
F508_O	PSMC4	PSMC4	85|63|70	218	72.67	3	33|20|28|32|20|16|9|5|9|15|13|16|11|11|5|8	1	1	1	1	1	4.63	0
F508_O	DSTN	DSTN	13|8|10	31	10.33	3	4|0|0|2|2|0|3|0|5|3|3|0|2|1|0|0	0.99	1	0.99	1	0.99	6.61	0
F508_O	ERP29	ERP29	5|5|8	18	6	3	0|0|0|0|0|0|0|0|0|0|0|0|0|0|0|0	1	1	1	1	1	60	0
F508_O	YWHAQ	YWHAQ	38|33|40	111	37	3	9|9|11|13|5|8|8|7|9|8|8|10|8|9|0|1	1	1	1	1	1	4.81	0
F508_O	ERLIN2	ERLIN2	33|38|30	101	33.67	3	22|0|7|6|13|8|17|10|11|9|2|3|9|6|9|9	0.96	1	0.96	1	0.96	3.82	0
F508_O	LRP8	LRP8	25|30|28	83	27.67	3	0|0|0|0|0|0|0|0|0|0|0|0|0|0|0|0	1	1	1	1	1	276.67	0
F508_O	GDI2	GDI2	15|5|10	30	10	3	3|0|0|2|1|0|0|0|1|1|0|0|1|0|0|0	1	1	1	1	1	17.78	0
F508_O	PCK2	PCK2	8|8|10	26	8.67	3	3|0|0|0|0|0|0|0|0|0|0|0|0|0|0|0	1	1	1	1	1	46.22	0
F508_O	DYNLRB1	DYNLRB1	15|18|13	46	15.33	3	0|0|0|0|0|0|0|5|0|8|0|2|0|0|0|0	1	1	1	1	1	16.36	0
F508_O	WWOX	WWOX	213|200|253	666	222	3	91|24|50|50|66|45|18|37|44|54|75|82|77|80|45|43	0.86	1	0.86	1	0.86	4.03	0.01
F508_O	LEMD3	LEMD3	30|43|40	113	37.67	3	10|5|3|4|2|2|10|13|16|17|2|0|0|2|13|14	0.99	1	0.99	1	0.99	5.33	0
F508_O	ARL8B	ARL8B	13|10|10	33	11	3	0|0|0|0|4|0|2|0|0|0|0|4|0|0|0|0	1	1	1	1	1	17.6	0
F508_O	DDX56	DDX56	5|8|8	21	7	3	2|3|0|0|1|0|2|0|3|4|0|0|0|0|6|3	0.91	0.96	0.91	0.96	0.91	4.67	0
F508_O	RPL28	RPL28	30|23|15	68	22.67	3	4|2|0|4|8|6|6|4|6|6|10|9|9|8|0|6	0.88	1	0.88	1	0.88	4.12	0.01
F508_O	PFN2	PFN2	25|28|43	96	32	3	11|2|10|7|6|5|8|12|3|2|11|10|12|13|0|0	0.98	1	0.98	1	0.98	4.57	0
F508_O	P4HB	P4HB	8|3|8	19	6.33	3	2|0|1|3|1|2|1|1|0|0|2|4|2|4|0|0	0.79	0.99	0.79	0.99	0.79	4.41	0.01
F508_O	DYNLT1	DYNLT1	10|8|13	31	10.33	3	3|0|0|1|0|0|3|5|2|1|3|2|2|4|0|0	0.99	1	0.99	1	0.99	6.36	0
F508_O	SEC61B	SEC61B	8|5|5	18	6	3	0|0|0|1|0|0|0|0|0|0|0|0|0|0|0|0	1	1	1	1	1	60	0
F508_O	VANGL2	VANGL2	5|8|18	31	10.33	3	0|0|0|0|0|0|0|0|0|1|0|0|0|0|0|0	1	1	1	1	1	103.33	0
F508_O	TNPO1	TNPO1	10|13|20	43	14.33	3	6|1|0|6|2|6|3|2|1|0|8|4|7|6|2|0	0.9	1	0.9	1	0.9	4.25	0.01
F508_O	KIAA1429	KIAA1429	10|8|13	31	10.33	3	6|3|1|4|0|0|3|3|2|4|0|1|1|0|2|0	0.98	1	0.98	1	0.98	5.51	0
F508_O	TMEM97	TMEM97	8|5|8	21	7	3	4|0|0|2|4|0|0|1|2|1|2|2|3|3|3|5	0.83	0.98	0.83	0.98	0.83	3.5	0.01
F508_O	SPTBN1	SPTBN1	5|8|10	23	7.67	3	4|2|2|0|3|1|3|0|0|3|0|0|0|3|0|2	0.95	1	0.95	1	0.95	5.33	0
F508_O	KIAA1549	KIAA1549	10|3|10	23	7.67	3	0|0|0|0|0|0|0|0|0|0|0|0|0|0|0|0	1	1	1	1	1	76.67	0
F508_O	COPB2	COPB2	8|13|10	31	10.33	3	3|0|3|1|1|1|2|3|6|5|1|3|3|2|1|4	0.98	1	0.98	1	0.98	4.24	0
F508_O	STK39	STK39	10|5|8	23	7.67	3	8|3|3|1|0|2|0|0|3|1|1|2|4|5|0|0	0.79	0.97	0.79	0.97	0.79	3.72	0.01
F508_O	RAB11FIP2	RAB11FIP2	15|5|20	40	13.33	3	0|0|0|0|0|0|0|0|5|7|0|0|0|0|0|0	0.98	1	0.98	1	0.98	17.78	0
F508_O	RPS27L	RPS27L	25|23|23	71	23.67	3	2|0|1|1|1|0|2|7|0|1|3|2|2|10|10|0	1	1	1	1	1	9.02	0
F508_O	TMED2	TMED2	8|3|8	19	6.33	3	3|0|0|1|0|0|0|0|0|0|1|0|0|0|0|0	0.99	1	0.99	1	0.99	20.27	0
F508_O	PKMYT1	PKMYT1	8|5|8	21	7	3	0|0|0|0|0|0|0|0|0|0|0|0|0|0|0|0	1	1	1	1	1	70	0
F508_O	OXSR1	OXSR1	3|8|10	21	7	3	1|0|1|4|2|0|2|2|2|2|1|0|1|1|2|1	0.8	1	0.8	1	0.8	5.09	0.01
F508_O	MTHFD2	MTHFD2	8|8|3	19	6.33	3	1|0|0|1|0|0|0|0|0|0|0|0|0|0|0|0	1	1	1	1	1	50.67	0
F508_O	IDH3A	IDH3A	8|10|15	33	11	3	0|0|0|0|0|0|0|0|0|0|0|0|1|0|0|0	1	1	1	1	1	110	0
F508_O	CDS2	CDS2	8|8|3	19	6.33	3	4|3|0|0|0|1|0|0|0|0|0|0|0|0|0|0	0.97	0.99	0.97	0.99	0.97	12.67	0
F508_O	CYCS	CYCS	8|3|5	16	5.33	3	0|0|0|0|0|0|0|0|0|0|0|0|0|0|0|0	1	1	1	1	1	53.33	0
F508_O	SMARCC1	SMARCC1	13|10|5	28	9.33	3	4|0|0|0|3|0|2|0|0|3|0|3|0|1|3|3	0.95	1	0.95	1	0.95	6.79	0
F508_O	LPCAT3	LPCAT3	3|10|5	18	6	3	3|2|2|0|1|0|0|0|0|0|0|0|1|0|0|0	0.96	1	0.96	1	0.96	10.67	0
F508_O	AP2S1	AP2S1	3|3|10	16	5.33	3	4|0|0|0|0|0|1|0|0|0|0|0|0|0|0|0	0.97	1	0.97	1	0.97	17.07	0
F508_O	MOGS	MOGS	10|8|13	31	10.33	3	7|2|2|2|2|4|7|5|2|0|1|1|0|1|1|1	0.94	0.99	0.94	0.99	0.94	4.35	0
F508_O	MAPK3	MAPK3	8|15|8	31	10.33	3	1|1|1|0|0|0|0|2|1|0|0|0|0|0|0|0	1	1	1	1	1	27.56	0
F508_O	PCYOX1	PCYOX1	3|3|10	16	5.33	3	0|0|0|0|0|0|0|0|0|0|0|0|0|0|0|0	1	1	1	1	1	53.33	0
F508_O	SFT2D1	SFT2D1	8|10|5	23	7.67	3	0|0|0|0|0|0|0|0|0|0|0|0|0|0|0|0	1	1	1	1	1	76.67	0
F508_O	MCU	MCU	3|3|8	14	4.67	3	0|0|0|0|0|0|1|0|0|0|0|0|0|0|0|0	1	1	1	1	1	46.67	0
F508_O	SLC7A2	SLC7A2	3|10|13	26	8.67	3	0|0|0|0|0|0|0|0|0|1|0|0|0|0|0|0	1	1	1	1	1	86.67	0
F508_O	DENR	DENR	5|3|3	11	3.67	3	0|0|0|0|0|0|0|0|1|2|0|0|0|0|0|1	0.99	1	0.99	1	0.99	14.67	0
F508_O	CHTOP	CHTOP	5|13|3	21	7	3	3|0|0|0|2|0|2|3|3|1|0|0|1|1|3|3	0.77	1	0.77	1	0.77	5.09	0.01
F508_O	ATP6V0C	ATP6V0C	13|5|10	28	9.33	3	0|0|0|0|0|0|0|0|0|0|1|0|0|0|1|1	1	1	1	1	1	49.78	0
F508_O	TMEM165	TMEM165	3|10|10	23	7.67	3	3|0|2|1|0|0|0|0|3|2|0|1|0|1|0|0	0.94	1	0.94	1	0.94	9.44	0
F508_O	CAMLG	CAMLG	25|8|20	53	17.67	3	4|3|2|0|0|0|3|0|4|3|0|0|2|0|0|0	0.99	1	0.99	1	0.99	13.46	0
F508_O	GCLM	GCLM	5|3|15	23	7.67	3	0|0|0|0|0|0|0|0|0|0|1|0|0|1|0|0	1	1	1	1	1	61.33	0
F508_O	MSI1	MSI1	3|5|3	11	3.67	3	0|1|0|1|0|0|1|2|0|0|0|0|0|0|0|0	0.99	1	0.99	1	0.99	11.73	0
F508_O	NDUFA4	NDUFA4	5|8|5	18	6	3	1|0|3|3|2|2|1|1|1|0|0|0|1|1|0|0	0.98	1	0.98	1	0.98	6	0
F508_O	RPL37A	RPL37A	33|15|23	71	23.67	3	6|3|4|6|2|2|6|4|1|3|3|5|4|5|0|0	1	1	1	1	1	7.01	0
F508_O	CDC42	CDC42	50|43|55	148	49.33	3	15|13|4|4|4|11|10|14|4|6|6|4|5|7|0|0	1	1	1	1	1	7.38	0
F508_O	FADS2	FADS2	3|3|5	11	3.67	3	0|0|0|0|0|0|0|0|0|0|0|0|0|1|0|0	1	1	1	1	1	36.67	0
F508_O	BET1	BET1	3|8|8	19	6.33	3	1|0|0|0|0|0|2|1|5|6|0|0|0|0|0|0	0.92	0.98	0.92	0.98	0.92	6.76	0
F508_O	GNG12	GNG12	3|3|3	9	3	3	3|1|0|2|1|2|0|0|0|0|0|0|0|0|0|0	0.9	0.9	0.9	0.9	0.9	5.33	0.01
F508_O	SPTLC1	SPTLC1	3|3|5	11	3.67	3	2|0|0|0|0|0|0|0|0|0|0|0|0|1|0|0	0.99	1	0.99	1	0.99	19.56	0
F508_O	SSR3	SSR3	23|23|20	66	22	3	7|3|4|4|2|2|1|0|6|7|2|3|3|5|0|3	1	1	1	1	1	6.77	0
F508_O	TRAM1	TRAM1	3|5|3	11	3.67	3	0|0|0|0|0|0|0|0|0|0|0|0|0|0|0|0	1	1	1	1	1	36.67	0
F508_O	CLCC1	CLCC1	3|15|30	48	16	3	1|1|0|0|0|0|0|0|0|0|3|2|5|2|0|0	0.93	1	0.93	1	0.93	18.29	0
F508_O	MPDU1	MPDU1	5|13|5	23	7.67	3	4|0|0|0|2|0|0|1|1|0|4|3|4|1|4|0	0.87	1	0.87	1	0.87	5.11	0.01
F508_O	MRPS34	MRPS34	5|5|5	15	5	3	0|0|0|1|4|4|0|1|1|0|0|0|2|1|0|0	0.94	0.94	0.94	0.94	0.94	5.71	0
F508_O	TMEM109	TMEM109	10|18|10	38	12.67	3	5|0|2|0|5|3|4|4|5|5|3|3|4|4|4|6	0.88	1	0.88	1	0.88	3.56	0.01
F508_O	SCARB1	SCARB1	5|3|8	16	5.33	3	0|0|0|0|0|0|0|0|0|0|0|0|0|0|0|0	1	1	1	1	1	53.33	0
F508_O	FAHD1	FAHD1	3|3|5	11	3.67	3	0|0|0|0|0|0|0|0|0|0|0|0|0|0|0|0	1	1	1	1	1	36.67	0
F508_O	RETSAT	RETSAT	3|3|3	9	3	3	0|0|0|0|0|0|0|0|0|0|0|0|1|0|0|0	1	1	1	1	1	30	0
F508_O	FKBP11	FKBP11	5|3|3	11	3.67	3	0|0|0|0|0|0|1|1|1|0|0|0|0|0|0|0	0.99	1	0.99	1	0.99	19.56	0
F508_O	C12orf23	C12orf23	3|5|3	11	3.67	3	1|0|1|2|2|0|0|0|0|0|0|2|0|0|0|0	0.95	0.99	0.95	0.99	0.95	7.33	0
F508_O	CDK5RAP3	CDK5RAP3	10|15|10	35	11.67	3	7|5|5|6|1|1|2|3|5|2|3|2|2|3|0|0	0.96	1	0.96	1	0.96	3.97	0
F508_O	KDSR	KDSR	5|5|5	15	5	3	0|0|0|0|0|0|0|0|0|0|0|0|0|0|0|0	1	1	1	1	1	50	0
F508_O	SCD	SCD	5|8|5	18	6	3	0|0|0|0|0|1|1|1|1|1|1|1|0|0|4|3	0.97	1	0.97	1	0.97	6.86	0
F508_O	KIAA0564	KIAA0564	8|5|10	23	7.67	3	0|1|0|2|0|0|0|0|0|0|0|0|0|0|0|0	1	1	1	1	1	40.89	0
F508_O	IBA57	IBA57	8|8|10	26	8.67	3	0|0|0|0|0|0|0|0|0|0|0|0|0|0|0|0	1	1	1	1	1	86.67	0
F508_O	SRSF6	SRSF6	5|10|3	18	6	3	3|0|1|0|0|1|0|1|0|0|3|0|1|0|2|0	0.94	1	0.94	1	0.94	8	0
F508_O	GSTK1	GSTK1	3|8|3	14	4.67	3	6|0|0|0|0|2|0|0|0|0|1|1|0|0|0|0	0.92	0.99	0.92	0.99	0.92	7.47	0
F508_O	UFM1	UFM1	3|5|8	16	5.33	3	4|0|2|0|0|0|0|0|0|0|0|0|1|1|2|3	0.92	0.99	0.92	0.99	0.92	6.56	0
F508_O	FNDC3A	FNDC3A	3|5|8	16	5.33	3	0|0|0|0|0|0|0|0|0|0|0|0|3|1|0|2	0.98	1	0.98	1	0.98	14.22	0
F508_O	VPS45	VPS45	3|5|13	21	7	3	1|0|0|0|0|0|3|2|1|2|0|0|0|0|0|0	0.96	1	0.96	1	0.96	12.44	0
F508_O	SLC6A6	SLC6A6	3|3|5	11	3.67	3	0|0|0|0|0|0|0|0|0|0|0|0|0|0|0|0	1	1	1	1	1	36.67	0
F508_O	ATPAF2	ATPAF2	3|3|3	9	3	3	1|0|0|1|0|0|0|0|1|0|0|0|0|1|0|0	0.98	0.98	0.98	0.98	0.98	12	0
F508_O	MFSD10	MFSD10	8|5|8	21	7	3	1|2|4|1|2|1|0|1|0|0|0|0|0|0|0|0	0.99	1	0.99	1	0.99	9.33	0
F508_O	ATP9A	ATP9A	3|3|5	11	3.67	3	0|0|0|0|0|0|0|0|0|0|0|0|0|0|0|0	1	1	1	1	1	36.67	0
F508_O	JPH1	JPH1	5|8|3	16	5.33	3	1|0|0|1|1|1|1|0|1|3|0|1|0|0|2|1	0.93	1	0.93	1	0.93	6.56	0
F508_O	SH3GLB1	SH3GLB1	3|5|8	16	5.33	3	4|2|0|0|1|0|2|1|2|0|0|0|0|2|0|2	0.88	1	0.88	1	0.88	5.33	0.01
F508_O	ARPC3	ARPC3	5|5|8	18	6	3	2|3|3|1|0|3|3|4|3|2|0|0|0|2|0|0	0.86	0.99	0.86	0.99	0.86	3.69	0.01
F508_O	OXA1L	OXA1L	5|3|5	13	4.33	3	0|0|0|0|0|0|0|0|0|0|1|0|0|0|2|2	0.99	1	0.99	1	0.99	13.87	0
F508_O	ZMYM3	ZMYM3	3|3|3	9	3	3	0|0|0|0|0|0|0|0|0|2|0|0|0|0|0|0	0.99	0.99	0.99	0.99	0.99	24	0
F508_O	PLP2	PLP2	3|3|5	11	3.67	3	0|0|0|0|0|0|0|0|0|0|0|0|0|0|0|0	1	1	1	1	1	36.67	0
F508_O	ARL6IP4	ARL6IP4	3|8|3	14	4.67	3	0|0|0|0|0|0|3|3|1|2|0|0|0|0|0|0	0.93	1	0.93	1	0.93	8.3	0
F508_O	MYEF2	MYEF2	3|13|13	29	9.67	3	5|0|1|0|0|1|0|0|2|0|1|0|0|0|1|0	0.95	1	0.95	1	0.95	14.06	0
F508_O	LIG1	LIG1	8|8|8	24	8	3	6|5|4|3|1|0|0|0|1|0|1|0|0|0|3|2	0.95	0.95	0.95	0.95	0.95	4.92	0
F508_O	UQCR11	UQCR11	3|3|5	11	3.67	3	0|0|0|0|0|0|0|0|0|0|0|0|0|0|0|0	1	1	1	1	1	36.67	0
F508_O	NOM1	NOM1	3|8|8	19	6.33	3	0|1|0|0|1|0|2|2|1|1|1|1|2|1|0|0	0.94	1	0.94	1	0.94	7.79	0
F508_O	SLC1A1	SLC1A1	3|8|3	14	4.67	3	1|0|0|0|0|0|0|0|0|0|0|0|0|0|0|0	1	1	1	1	1	46.67	0
F508_O	SEMA4C	SEMA4C	13|20|13	46	15.33	3	0|0|0|0|0|0|0|0|0|0|0|0|0|0|0|0	1	1	1	1	1	153.33	0
F508_O	LAMC2	LAMC2	8|5|15	28	9.33	3	0|0|0|0|0|0|0|0|0|0|0|2|0|0|0|0	1	1	1	1	1	74.67	0
F508_O	EBP	EBP	10|13|10	33	11	3	0|0|0|2|0|0|0|0|0|0|2|0|0|0|0|0	1	1	1	1	1	44	0
F508_O	TMX4	TMX4	3|3|5	11	3.67	3	1|0|0|0|0|0|0|0|1|1|0|0|0|0|0|0	0.99	1	0.99	1	0.99	19.56	0
F508_O	RAD21	RAD21	5|10|5	20	6.67	3	2|1|1|2|2|1|3|3|4|3|1|4|0|0|0|2	0.79	1	0.79	1	0.79	3.68	0.01
F508_O	NCSTN	NCSTN	3|5|3	11	3.67	3	0|0|0|0|0|0|0|0|0|0|0|0|0|0|0|0	1	1	1	1	1	36.67	0
F508_O	PMVK	PMVK	3|3|5	11	3.67	3	1|0|0|0|1|0|0|0|1|0|0|0|0|0|0|1	0.99	1	0.99	1	0.99	14.67	0
F508_O	REEP5	REEP5	5|3|3	11	3.67	3	0|0|0|0|0|0|0|0|0|0|0|0|0|0|0|0	1	1	1	1	1	36.67	0
F508_O	WDR81	WDR81	3|3|3	9	3	3	0|0|2|1|0|1|3|1|0|0|1|0|0|1|0|0	0.88	0.88	0.88	0.88	0.88	4.8	0.01
F508_O	RARS2	RARS2	5|5|3	13	4.33	3	3|2|2|0|0|0|1|1|0|0|1|0|0|0|0|0	0.95	0.98	0.95	0.98	0.95	6.93	0
F508_O	SGTA	SGTA	3|3|3	9	3	3	0|0|0|0|0|0|0|0|0|0|0|0|0|0|0|0	1	1	1	1	1	30	0
F508_O	DHCR24	DHCR24	3|5|3	11	3.67	3	0|0|1|2|1|2|0|0|0|0|1|0|0|0|0|0	0.96	1	0.96	1	0.96	8.38	0
F508_O	PIN4	PIN4	3|8|3	14	4.67	3	1|0|0|0|0|0|4|4|0|0|0|0|0|0|1|0	0.92	0.99	0.92	0.99	0.92	7.47	0
F508_O	NDUFA6	NDUFA6	3|5|8	16	5.33	3	0|0|0|0|0|1|0|0|0|0|1|0|0|0|0|0	1	1	1	1	1	42.67	0
F508_O	YRDC	YRDC	3|3|8	14	4.67	3	0|0|0|0|2|0|1|0|0|0|0|0|0|0|0|0	0.99	1	0.99	1	0.99	24.89	0
F508_O	LNPEP	LNPEP	8|5|3	16	5.33	3	3|0|0|0|0|0|0|0|0|0|0|1|1|1|0|0	0.98	1	0.98	1	0.98	14.22	0
F508_O	TMEM38B	TMEM38B	3|5|3	11	3.67	3	1|1|0|0|0|0|1|1|0|0|0|0|0|0|0|0	0.99	1	0.99	1	0.99	14.67	0
F508_O	SACM1L	SACM1L	3|3|8	14	4.67	3	0|0|0|1|1|0|0|0|0|0|0|0|0|0|0|0	1	1	1	1	1	37.33	0
F508_O	SUCLA2	SUCLA2	5|3|10	18	6	3	0|0|2|0|2|0|0|1|0|1|1|1|1|2|0|0	0.95	1	0.95	1	0.95	8.73	0
F508_O	MRPL40	MRPL40	3|3|10	16	5.33	3	3|3|1|0|0|2|2|2|0|0|0|0|0|0|0|0	0.87	1	0.87	1	0.87	6.56	0.01
F508_O	SLC38A1	SLC38A1	10|8|3	21	7	3	0|0|0|0|0|0|0|3|0|0|0|0|0|0|0|0	0.99	1	0.99	1	0.99	37.33	0
F508_O	TMEM93	TMEM93	25|30|10	65	21.67	3	0|0|0|0|0|0|0|0|0|0|0|0|0|0|0|0	1	1	1	1	1	216.67	0
F508_O	ATP6	ATP6	13|13|10	36	12	3	4|0|2|0|2|2|3|3|1|0|3|2|3|3|0|0	1	1	1	1	1	6.86	0
F508_O	SRSF10	SRSF10	3|5|3	11	3.67	3	4|0|0|0|2|0|3|3|0|2|0|1|0|0|0|0	0.82	0.93	0.82	0.93	0.82	3.91	0.01
F508_O	ACADSB	ACADSB	5|5|13	23	7.67	3	3|0|0|0|1|0|1|0|0|0|2|2|2|2|0|0	0.98	1	0.98	1	0.98	9.44	0
F508_O	SLC12A2	SLC12A2	5|10|10	25	8.33	3	2|1|0|0|0|0|0|0|0|0|0|0|0|0|1|1	1	1	1	1	1	26.67	0
F508_O	C20orf43	C20orf43	8|3|5	16	5.33	3	0|0|0|0|0|0|3|5|7|5|0|0|0|0|0|1	0.81	0.96	0.81	0.96	0.81	4.06	0.01
F508_O	GBAS	GBAS	5|5|3	13	4.33	3	1|0|0|1|0|0|0|0|0|0|2|0|6|3|0|0	0.9	0.94	0.9	0.94	0.9	5.33	0.01
F508_O	GSTM3	GSTM3	3|5|3	11	3.67	3	1|0|2|1|2|1|0|0|1|0|0|0|0|0|0|1	0.94	0.99	0.94	0.99	0.94	6.52	0
F508_O	RFT1	RFT1	3|3|8	14	4.67	3	0|0|0|0|0|0|0|0|0|0|0|0|0|0|0|0	1	1	1	1	1	46.67	0
F508_O	ATOX1	ATOX1	3|3|3	9	3	3	0|0|0|0|0|0|0|0|0|0|0|0|0|0|0|0	1	1	1	1	1	30	0
F508_O	ICMT	ICMT	10|8|10	28	9.33	3	0|0|0|0|0|0|0|0|0|0|1|2|1|0|0|0	1	1	1	1	1	37.33	0
F508_O	PHF6	PHF6	3|5|5	13	4.33	3	2|0|0|0|0|0|0|0|2|0|0|0|0|1|2|0	0.97	0.99	0.97	0.99	0.97	9.9	0
F508_O	ALDH7A1	ALDH7A1	3|18|20	41	13.67	3	2|0|0|0|1|0|4|2|1|0|1|0|0|0|2|3	0.9	1	0.9	1	0.9	13.67	0.01
F508_O	PRAMEF18	PRAMEF18	15|13|13	41	13.67	3	5|0|0|0|0|3|0|0|0|0|0|0|0|0|0|0	1	1	1	1	1	27.33	0
F508_O	EPCAM	EPCAM	3|3|8	14	4.67	3	0|0|0|0|0|0|0|0|0|0|0|0|0|0|0|0	1	1	1	1	1	46.67	0
F508_O	FAM127B	FAM127B	3|8|8	19	6.33	3	0|0|0|0|0|0|0|0|0|0|0|0|0|0|0|0	1	1	1	1	1	63.33	0
F508_O	KIAA1715	KIAA1715	3|8|13	24	8	3	0|0|0|0|0|0|0|0|0|0|0|0|0|0|0|0	1	1	1	1	1	80	0
F508_O	GNB1L	GNB1L	5|3|5	13	4.33	3	0|0|0|0|0|0|0|0|0|0|0|0|0|0|0|0	1	1	1	1	1	43.33	0
F508_O	VKORC1L1	VKORC1L1	3|3|5	11	3.67	3	1|1|1|1|1|0|1|0|0|0|0|1|1|2|0|0	0.92	0.99	0.92	0.99	0.92	5.87	0
F508_O	ZNF74	ZNF74	13|13|15	41	13.67	3	0|0|0|0|0|0|0|0|0|0|0|0|0|0|0|0	1	1	1	1	1	136.67	0
F508_O	LANCL2	LANCL2	3|8|3	14	4.67	3	0|0|0|0|1|1|0|0|0|0|1|1|1|0|2|0	0.96	1	0.96	1	0.96	10.67	0
F508_O	TAF4	TAF4	10|13|10	33	11	3	4|0|0|0|0|0|2|0|0|0|0|0|0|1|0|0	1	1	1	1	1	25.14	0
F508_O	ELOVL5	ELOVL5	10|10|13	33	11	3	2|1|2|1|2|3|2|4|4|3|4|4|2|5|0|6	0.98	1	0.98	1	0.98	3.91	0
F508_O	NEB	NEB	3|8|5	16	5.33	3	0|0|0|0|0|0|0|0|0|0|0|0|0|0|0|0	1	1	1	1	1	53.33	0
F508	SAV_STRAV	SAV_STRAV	1520|1230|1180	3930	1310	3	0|0|0|0|0|0|0|0|0|0|0|0|0|0|0|0	1	1	1	1	1	13100	0
F508	CANX	CANX	180|185|180	545	181.67	3	30|9|12|15|20|14|19|21|10|10|25|20|25|21|9|10	1	1	1	1	1	10.77	0
F508	COASY	COASY	25|35|35	95	31.67	3	5|4|4|5|7|3|9|9|7|5|1|3|3|4|4|5	1	1	1	1	1	6.5	0
F508	TIMM13	TIMM13	30|25|45	100	33.33	3	0|0|0|0|0|0|0|0|0|0|0|0|0|0|0|0	1	1	1	1	1	333.33	0
F508	SMC2	SMC2	85|70|40	195	65	3	9|0|10|12|17|15|8|16|22|11|13|11|14|21|11|9	0.99	1	0.99	1	0.99	5.23	0
F508	PPA1	PPA1	135|140|85	360	120	3	25|7|25|17|19|22|31|23|15|24|29|33|26|32|16|15	1	1	1	1	1	5.35	0
F508	TAF4	TAF4	20|30|45	95	31.67	3	4|0|0|0|0|0|2|0|0|0|0|0|0|1|0|0	1	1	1	1	1	72.38	0
F508	LAMP1	LAMP1	10|15|5	30	10	3	0|0|0|0|0|0|0|0|0|0|0|0|0|0|0|0	1	1	1	1	1	100	0
F508	SUCLA2	SUCLA2	25|5|10	40	13.33	3	0|0|2|0|2|0|0|1|0|1|1|1|1|2|0|0	1	1	1	1	1	19.39	0
F508	SPCS3	SPCS3	35|30|70	135	45	3	3|0|0|0|0|0|3|2|2|1|0|0|0|0|0|2	1	1	1	1	1	55.38	0
F508	HIST1H4J	HIST1H4J	250|265|295	810	270	3	73|4|51|44|41|41|81|84|55|54|84|86|83|82|57|57	1	1	1	1	1	4.42	0
F508	SDHB	SDHB	10|25|15	50	16.67	3	0|0|1|1|2|3|0|2|0|0|0|0|0|0|0|0	1	1	1	1	1	29.63	0
F508	SLC16A1	SLC16A1	20|25|30	75	25	3	8|3|7|12|5|6|2|4|4|6|12|10|12|8|3|5	0.97	1	0.97	1	0.97	3.74	0
F508	SCAMP1	SCAMP1	30|40|30	100	33.33	3	2|0|0|1|0|0|2|3|8|7|0|0|0|0|2|6	1	1	1	1	1	17.2	0
F508	GARS	GARS	115|115|50	280	93.33	3	15|6|5|5|7|4|7|12|2|3|6|6|7|5|4|2	1	1	1	1	1	15.56	0
F508	PTPLAD1	PTPLAD1	210|185|105	500	166.67	3	22|13|23|17|23|13|25|25|22|19|35|34|33|30|34|28	1	1	1	1	1	6.73	0
F508	RG9MTD1	RG9MTD1	40|40|20	100	33.33	3	5|2|0|0|2|2|1|2|3|0|3|3|3|0|3|3	1	1	1	1	1	16.67	0
F508	SRSF1	SRSF1	25|35|80	140	46.67	3	17|1|7|4|7|1|4|8|2|4|8|6|10|11|6|4	1	1	1	1	1	7.47	0
F508	HNRNPUL2	HNRNPUL2	20|35|30	85	28.33	3	8|2|4|7|6|4|10|6|7|6|3|4|6|8|3|4	1	1	1	1	1	5.15	0
F508	RPS18	RPS18	85|90|90	265	88.33	3	5|0|6|8|9|8|7|5|2|2|7|6|10|8|3|4	1	1	1	1	1	15.7	0
F508	DHCR7	DHCR7	40|30|35	105	35	3	4|0|2|2|3|0|0|0|0|2|2|3|3|4|2|3	1	1	1	1	1	18.67	0
F508	NNT	NNT	40|40|35	115	38.33	3	4|0|6|4|7|3|1|0|1|0|5|4|4|4|0|2	1	1	1	1	1	13.63	0
F508	FARSB	FARSB	50|40|85	175	58.33	3	10|0|6|8|9|4|13|15|14|13|16|14|13|11|3|4	1	1	1	1	1	6.1	0
F508	PA2G4	PA2G4	150|150|140	440	146.67	3	43|4|32|27|34|27|50|43|53|54|43|47|42|44|34|31	1	1	1	1	1	3.86	0
F508	POR	POR	65|60|30	155	51.67	3	2|3|0|0|0|0|0|2|0|0|0|0|0|0|0|0	1	1	1	1	1	118.1	0
F508	DDRGK1	DDRGK1	70|55|10	135	45	3	4|2|0|1|0|0|1|2|2|1|0|1|2|2|3|5	1	1	1	1	1	27.69	0
F508	NUP85	NUP85	30|15|10	55	18.33	3	9|3|1|0|4|0|0|3|1|2|3|6|5|5|5|6	0.92	1	0.92	1	0.92	5.53	0
F508	PUM1	PUM1	20|20|30	70	23.33	3	7|2|4|5|7|3|2|3|8|9|6|6|5|3|3|5	1	1	1	1	1	4.79	0
F508	RPS5	RPS5	45|60|25	130	43.33	3	13|2|5|4|0|4|6|5|11|10|15|11|11|8|0|0	0.99	1	0.99	1	0.99	6.6	0
F508	MARS	MARS	125|125|65	315	105	3	29|12|26|23|27|30|23|31|28|37|22|24|22|23|17|21	0.89	1	0.89	1	0.89	4.25	0.01
F508	HNRPDL	HNRPDL	55|45|55	155	51.67	3	17|9|12|10|10|16|23|24|15|20|14|14|19|14|8|9	1	1	1	1	1	3.53	0
F508	HNRNPD	HNRNPD	85|70|80	235	78.33	3	30|16|20|23|19|12|37|32|29|29|27|28|32|30|19|20	0.81	1	0.81	1	0.81	3.11	0.01
F508	HNRNPM	HNRNPM	350|380|335	1065	355	3	85|34|60|63|62|64|75|81|51|56|86|80|74|89|38|37	1	1	1	1	1	5.49	0
F508	RPS9	RPS9	230|220|230	680	226.67	3	25|4|32|30|32|33|27|34|20|19|39|44|39|40|28|23	1	1	1	1	1	7.73	0
F508	ESYT1	ESYT1	245|250|200	695	231.67	3	54|32|26|34|23|20|31|29|47|39|36|29|41|41|42|42	1	1	1	1	1	6.55	0
F508	NTPCR	NTPCR	90|70|120	280	93.33	3	16|5|6|3|7|8|4|6|1|4|2|0|3|2|0|0	1	1	1	1	1	22.29	0
F508	USMG5	USMG5	25|15|20	60	20	3	6|0|5|5|4|3|3|3|3|3|6|3|4|4|3|0	1	1	1	1	1	5.82	0
F508	RPS12	RPS12	215|230|170	615	205	3	12|9|9|6|9|10|16|17|25|25|12|12|11|6|0|5	1	1	1	1	1	17.83	0
F508	POLR2E	POLR2E	20|15|20	55	18.33	3	5|2|3|3|3|3|6|8|6|6|5|4|4|2|4|4	1	1	1	1	1	4.31	0
F508	SEC23B	SEC23B	30|35|25	90	30	3	11|0|6|4|7|5|4|5|13|9|0|1|0|0|5|5	1	1	1	1	1	6.4	0
F508	RRS1	RRS1	45|45|60	150	50	3	10|9|5|3|1|0|6|12|6|3|6|5|6|8|4|6	1	1	1	1	1	8.89	0
F508	HNRNPF	HNRNPF	180|150|185	515	171.67	3	41|30|42|38|31|35|41|41|46|47|21|17|19|24|22|27	1	1	1	1	1	5.26	0
F508	CECR5	CECR5	25|20|10	55	18.33	3	4|1|1|2|0|4|1|1|0|0|3|1|3|2|1|0	1	1	1	1	1	12.22	0
F508	ANKLE2	ANKLE2	15|15|20	50	16.67	3	2|0|1|1|0|1|0|3|8|10|1|1|3|2|2|0	0.99	1	0.99	1	0.99	7.62	0
F508	RPS24	RPS24	155|130|115	400	133.33	3	32|9|21|27|25|28|25|28|33|28|46|44|38|40|14|12	1	1	1	1	1	4.74	0
F508	AP2M1	AP2M1	30|25|25	80	26.67	3	9|2|9|6|11|10|7|5|7|7|7|12|10|9|5|6	1	1	1	1	1	3.5	0
F508	MOGS	MOGS	15|20|40	75	25	3	7|2|2|2|2|4|7|5|2|0|1|1|0|1|1|1	1	1	1	1	1	10.53	0
F508	SRP14	SRP14	50|55|40	145	48.33	3	6|4|2|3|5|4|11|7|5|9|7|6|8|5|6|7	1	1	1	1	1	8.14	0
F508	GAR1	GAR1	15|15|20	50	16.67	3	4|0|2|2|1|1|1|4|0|0|0|0|0|0|1|0	1	1	1	1	1	16.67	0
F508	ATP6AP2	ATP6AP2	55|30|20	105	35	3	0|0|0|0|0|0|0|0|0|0|0|0|0|0|0|0	1	1	1	1	1	350	0
F508	ARHGEF2	ARHGEF2	40|30|15	85	28.33	3	9|2|0|0|9|6|5|4|1|2|2|8|5|6|0|0	0.99	1	0.99	1	0.99	7.68	0
F508	RPS2	RPS2	215|250|200	665	221.67	3	60|14|50|51|38|36|61|48|77|58|51|60|59|48|28|35	1	1	1	1	1	4.58	0
F508	TMX1	TMX1	30|35|35	100	33.33	3	0|0|0|0|1|0|2|1|4|2|0|0|0|1|0|0	1	1	1	1	1	48.48	0
F508	PRPF40A	PRPF40A	45|55|50	150	50	3	15|8|9|8|9|10|16|18|13|18|8|15|13|9|14|13	1	1	1	1	1	4.08	0
F508	RPL10A	RPL10A	100|80|60	240	80	3	32|3|17|13|18|18|14|33|9|5|23|24|16|16|9|12	0.99	1	0.99	1	0.99	4.89	0
F508	RPL7	RPL7	180|190|155	525	175	3	38|14|26|27|37|29|22|29|30|27|43|45|35|42|20|19	1	1	1	1	1	5.8	0
F508	RPL8	RPL8	30|50|45	125	41.67	3	10|8|13|6|8|12|7|11|8|6|14|18|15|11|14|10	1	1	1	1	1	3.9	0
F508	KHSRP	KHSRP	140|145|135	420	140	3	31|0|22|20|24|16|29|26|40|43|42|38|33|40|31|31	1	1	1	1	1	4.81	0
F508	TRAP1	TRAP1	325|300|210	835	278.33	3	69|26|56|54|41|56|43|43|40|47|88|84|87|82|21|20	0.99	1	0.99	1	0.99	5.2	0
F508	NSF	NSF	50|35|30	115	38.33	3	8|0|7|5|6|2|2|7|6|14|4|4|4|4|7|8	1	1	1	1	1	6.97	0
F508	MYBBP1A	MYBBP1A	195|165|175	535	178.33	3	66|28|31|28|25|30|52|50|44|50|42|46|52|49|32|28	1	1	1	1	1	4.37	0
F508	NOC2L	NOC2L	40|40|30	110	36.67	3	3|0|1|0|1|3|0|0|6|4|5|7|7|4|0|4	1	1	1	1	1	13.04	0
F508	RPL35A	RPL35A	20|25|35	80	26.67	3	5|0|4|5|4|4|4|3|3|4|6|7|8|9|3|3	1	1	1	1	1	5.93	0
F508	RPL36	RPL36	25|20|15	60	20	3	3|0|4|6|5|4|7|3|3|1|4|6|6|6|6|5	1	1	1	1	1	4.64	0
F508	SPCS2	SPCS2	25|20|20	65	21.67	3	2|1|0|0|0|0|0|0|1|2|0|0|0|0|0|0	1	1	1	1	1	57.78	0
F508	UQCRFS1	UQCRFS1	30|50|25	105	35	3	7|4|4|3|1|2|5|2|0|0|0|4|3|6|3|4	1	1	1	1	1	11.67	0
F508	NACA	NACA	50|60|55	165	55	3	9|1|5|8|8|5|14|17|22|19|15|17|10|11|16|16	1	1	1	1	1	4.56	0
F508	DDX54	DDX54	140|90|55	285	95	3	43|12|18|14|7|10|15|11|4|2|12|19|16|12|4|0	1	1	1	1	1	7.64	0
F508	DYNC1LI1	DYNC1LI1	25|15|5	45	15	3	3|0|1|3|0|1|4|2|1|0|2|1|0|5|3|0	0.92	1	0.92	1	0.92	9.23	0
F508	PFN2	PFN2	50|60|95	205	68.33	3	11|2|10|7|6|5|8|12|3|2|11|10|12|13|0|0	1	1	1	1	1	9.76	0
F508	RPL6	RPL6	340|300|275	915	305	3	62|40|50|55|49|44|63|61|25|19|89|81|80|86|23|26	1	1	1	1	1	5.72	0
F508	RPLP0	RPLP0	150|145|155	450	150	3	24|5|11|13|19|18|29|23|29|21|22|20|23|20|18|21	1	1	1	1	1	7.59	0
F508	SSR1	SSR1	55|40|35	130	43.33	3	2|2|0|2|0|0|1|2|3|1|0|1|0|0|0|0	1	1	1	1	1	49.52	0
F508	ASS1	ASS1	100|95|55	250	83.33	3	7|1|2|0|5|3|16|12|38|32|11|14|16|9|0|0	1	1	1	1	1	8.03	0
F508	COX5B	COX5B	40|50|20	110	36.67	3	1|0|0|0|0|0|0|0|0|0|0|0|0|0|0|0	1	1	1	1	1	366.67	0
F508	STX7	STX7	30|15|20	65	21.67	3	6|0|0|0|0|0|0|1|3|4|0|0|0|0|0|0	1	1	1	1	1	24.76	0
F508	ATP6AP1	ATP6AP1	30|40|20	90	30	3	1|0|0|1|0|0|0|0|1|1|0|0|0|0|0|0	1	1	1	1	1	120	0
F508	CCDC47	CCDC47	335|370|225	930	310	3	8|3|2|2|5|0|6|3|13|14|1|1|4|4|0|3	1	1	1	1	1	71.88	0
F508	RPL21	RPL21	130|120|125	375	125	3	20|11|27|31|25|29|3|5|10|6|27|30|27|26|5|4	1	1	1	1	1	6.99	0
F508	CAD	CAD	180|155|105	440	146.67	3	23|6|26|18|28|17|27|24|18|17|27|22|23|24|5|7	1	1	1	1	1	7.52	0
F508	PARK7	PARK7	75|80|60	215	71.67	3	10|0|12|8|11|6|4|6|3|5|2|0|7|6|2|3	1	1	1	1	1	13.49	0
F508	DDX39B	DDX39B	285|260|180	725	241.67	3	47|15|36|24|31|30|59|53|62|62|50|48|52|55|45|44	1	1	1	1	1	5.42	0
F508	VAT1	VAT1	20|25|10	55	18.33	3	1|0|0|0|0|1|0|2|2|1|0|0|0|0|0|0	1	1	1	1	1	41.9	0
F508	ZMPSTE24	ZMPSTE24	60|35|5	100	33.33	3	7|2|3|2|0|0|2|1|0|0|1|0|0|1|0|0	0.96	1	0.96	1	0.96	28.07	0
F508	SLC25A19	SLC25A19	25|25|15	65	21.67	3	0|0|1|1|1|0|0|0|0|0|2|0|0|1|0|0	1	1	1	1	1	57.78	0
F508	NDUFS7	NDUFS7	25|20|10	55	18.33	3	2|0|0|0|0|0|2|4|2|0|0|1|1|1|3|0	1	1	1	1	1	18.33	0
F508	HMOX2	HMOX2	20|45|10	75	25	3	1|0|0|0|0|0|0|0|4|3|1|0|2|1|0|0	1	1	1	1	1	33.33	0
F508	ETFA	ETFA	75|80|40	195	65	3	14|4|5|2|3|2|0|0|2|5|7|4|3|7|7|4	1	1	1	1	1	15.07	0
F508	TFRC	TFRC	55|45|35	135	45	3	0|0|3|1|3|0|2|2|0|0|0|1|0|0|0|0	1	1	1	1	1	60	0
F508	DIS3	DIS3	50|75|30	155	51.67	3	17|0|6|9|10|10|5|11|11|8|12|13|12|10|14|14	0.98	1	0.98	1	0.98	5.1	0
F508	MTPAP	MTPAP	10|10|10	30	10	3	1|0|1|2|0|0|1|2|2|2|0|0|0|3|0|0	1	1	1	1	1	11.43	0
F508	TM9SF3	TM9SF3	40|30|20	90	30	3	2|3|4|4|2|0|3|5|2|2|3|3|3|2|2|2	1	1	1	1	1	11.43	0
F508	COX5A	COX5A	35|20|25	80	26.67	3	2|1|0|0|0|0|3|3|3|3|0|0|0|0|1|0	1	1	1	1	1	26.67	0
F508	SRRT	SRRT	40|55|20	115	38.33	3	8|1|1|4|3|5|1|1|10|8|3|4|4|5|6|3	1	1	1	1	1	9.15	0
F508	TOMM40	TOMM40	120|130|85	335	111.67	3	32|17|32|31|34|25|13|11|4|6|27|29|38|37|11|11	0.99	1	0.99	1	0.99	4.99	0
F508	NSDHL	NSDHL	80|85|75	240	80	3	10|7|8|7|7|11|6|10|13|12|9|10|10|11|7|8	1	1	1	1	1	8.77	0
F508	NIPSNAP1	NIPSNAP1	20|25|15	60	20	3	2|0|0|0|0|0|0|0|1|2|1|1|0|0|0|1	1	1	1	1	1	40	0
F508	SRP9	SRP9	30|30|25	85	28.33	3	4|0|3|2|2|2|3|4|3|2|0|0|0|0|2|2	1	1	1	1	1	15.63	0
F508	PSMC6	PSMC6	50|35|25	110	36.67	3	8|0|6|7|7|6|8|9|6|8|9|10|11|11|4|4	1	1	1	1	1	5.15	0
F508	HYOU1	HYOU1	100|100|70	270	90	3	19|10|11|15|9|4|4|5|1|0|9|10|11|8|2|2	1	1	1	1	1	12	0
F508	CKAP4	CKAP4	155|165|165	485	161.67	3	26|4|15|14|16|13|25|30|13|10|17|14|19|14|1|2	1	1	1	1	1	11.1	0
F508	ST13	ST13	15|10|15	40	13.33	3	2|0|0|0|0|0|4|6|3|2|0|0|0|3|3|2	0.99	1	0.99	1	0.99	8.53	0
F508	RAD50	RAD50	115|100|30	245	81.67	3	13|12|10|13|10|8|3|0|0|3|7|3|8|9|0|0	1	1	1	1	1	13.2	0
F508	DDOST	DDOST	130|95|100	325	108.33	3	23|7|11|9|10|8|13|11|9|12|18|16|22|19|7|5	1	1	1	1	1	8.67	0
F508	HADHA	HADHA	145|150|80	375	125	3	15|3|1|4|3|2|5|7|2|1|1|0|3|4|1|2	1	1	1	1	1	37.04	0
F508	NDUFV1	NDUFV1	15|15|10	40	13.33	3	4|2|1|2|0|1|0|0|0|0|0|0|1|1|0|0	1	1	1	1	1	17.78	0
F508	HSP90AB1	HSP90AB1	600|585|470	1655	551.67	3	117|12|90|88|86|90|96|95|72|64|126|125|120|107|55|62	1	1	1	1	1	6.28	0
F508	ATP6V1F	ATP6V1F	65|40|15	120	40	3	0|0|0|0|0|0|2|1|3|4|0|0|0|0|0|1	1	1	1	1	1	58.18	0
F508	VDAC3	VDAC3	155|170|170	495	165	3	32|0|22|19|21|21|28|28|24|23|29|27|20|23|14|16	1	1	1	1	1	7.61	0
F508	EPHX1	EPHX1	25|30|25	80	26.67	3	0|0|0|0|0|0|0|0|0|0|0|0|0|0|0|0	1	1	1	1	1	266.67	0
F508	DDX39A	DDX39A	275|290|180	745	248.33	3	37|12|31|23|30|38|43|41|53|51|47|49|50|48|41|35	1	1	1	1	1	6.32	0
F508	BCAP31	BCAP31	15|20|20	55	18.33	3	1|0|0|1|1|2|0|0|0|0|1|0|2|0|3|3	1	1	1	1	1	20.95	0
F508	RBM42	RBM42	10|5|10	25	8.33	3	1|0|0|0|0|0|0|0|3|3|0|0|0|0|0|0	0.99	1	0.99	1	0.99	19.05	0
F508	PSMC3	PSMC3	185|175|120	480	160	3	18|10|19|19|22|25|13|12|11|16|16|15|19|19|5|12	1	1	1	1	1	10.2	0
F508	ALDH18A1	ALDH18A1	305|325|215	845	281.67	3	64|16|59|40|63|61|35|30|27|32|69|75|75|68|32|33	1	1	1	1	1	5.79	0
F508	ATP5F1	ATP5F1	80|50|15	145	48.33	3	2|0|0|1|4|2|0|0|0|0|0|1|1|0|0|0	1	1	1	1	1	70.3	0
F508	SLC38A2	SLC38A2	60|45|15	120	40	3	7|6|0|2|2|4|6|3|2|2|2|4|3|4|1|0	1	1	1	1	1	13.33	0
F508	PITHD1	PITHD1	10|20|15	45	15	3	0|0|0|0|0|0|0|0|0|0|0|0|0|0|0|0	1	1	1	1	1	150	0
F508	AGPAT9	AGPAT9	20|40|25	85	28.33	3	0|0|0|0|0|0|0|0|0|0|0|0|0|0|0|0	1	1	1	1	1	283.33	0
F508	SLC25A1	SLC25A1	90|75|55	220	73.33	3	11|0|9|5|8|7|10|11|5|9|14|13|12|12|7|3	1	1	1	1	1	8.63	0
F508	LONP1	LONP1	60|65|40	165	55	3	14|13|13|10|7|6|5|6|4|3|16|12|14|20|0|2	1	1	1	1	1	6.07	0
F508	ALG5	ALG5	25|30|30	85	28.33	3	3|0|0|1|1|3|1|0|1|1|0|0|1|1|0|0	1	1	1	1	1	34.87	0
F508	AIMP1	AIMP1	15|10|20	45	15	3	2|1|6|6|3|8|4|4|2|2|4|0|6|7|5|3	0.85	1	0.85	1	0.85	3.81	0.01
F508	MATR3	MATR3	270|235|155	660	220	3	39|22|19|29|20|24|27|23|31|38|34|34|32|35|38|36	1	1	1	1	1	7.32	0
F508	SAR1A	SAR1A	50|45|30	125	41.67	3	8|1|5|2|3|2|8|7|4|5|3|2|2|3|3|2	1	1	1	1	1	11.11	0
F508	NDUFV2	NDUFV2	25|25|25	75	25	3	0|1|0|1|0|1|0|3|0|0|0|0|0|2|3|2	1	1	1	1	1	30.77	0
F508	MTHFD1	MTHFD1	320|285|270	875	291.67	3	48|17|45|47|40|41|39|42|16|15|63|56|51|52|19|23	1	1	1	1	1	7.6	0
F508	MTDH	MTDH	60|65|40	165	55	3	23|5|17|16|10|9|12|13|12|16|11|15|13|21|20|15	0.97	1	0.97	1	0.97	3.86	0
F508	TMEM33	TMEM33	15|10|25	50	16.67	3	6|0|7|4|6|8|2|1|1|0|5|4|6|6|6|3	0.78	1	0.78	1	0.78	4.1	0.01
F508	DDX27	DDX27	40|35|45	120	40	3	16|5|8|8|9|10|18|16|18|11|6|7|6|5|16|9	1	1	1	1	1	3.81	0
F508	CTSB	CTSB	25|25|10	60	20	3	0|2|0|0|0|0|0|0|0|0|0|2|2|0|1|0	1	1	1	1	1	45.71	0
F508	CYP51A1	CYP51A1	30|20|10	60	20	3	1|1|0|0|2|1|1|1|0|0|1|0|1|1|0|0	1	1	1	1	1	32	0
F508	RPS20	RPS20	35|35|65	135	45	3	10|0|12|12|9|12|8|7|12|11|11|12|9|10|14|14	1	1	1	1	1	4.42	0
F508	C12orf23	C12orf23	15|5|5	25	8.33	3	1|0|1|2|2|0|0|0|0|0|0|2|0|0|0|0	1	1	1	1	1	16.67	0
F508	STT3A	STT3A	105|105|110	320	106.67	3	11|6|13|5|11|14|9|8|5|5|6|8|11|10|6|13	1	1	1	1	1	12.1	0
F508	SLC27A2	SLC27A2	25|15|10	50	16.67	3	0|0|0|0|0|0|0|0|0|0|0|0|0|0|0|0	1	1	1	1	1	166.67	0
F508	PHGDH	PHGDH	180|185|135	500	166.67	3	45|25|32|31|35|29|31|37|24|27|50|49|42|39|3|6	1	1	1	1	1	5.28	0
F508	SRPR	SRPR	95|80|70	245	81.67	3	9|5|6|7|5|6|11|10|12|9|7|10|4|7|3|2	1	1	1	1	1	11.56	0
F508	MCM5	MCM5	200|160|95	455	151.67	3	18|1|13|18|13|3|18|18|8|12|9|11|12|18|15|16	1	1	1	1	1	11.95	0
F508	EBNA1BP2	EBNA1BP2	35|30|20	85	28.33	3	11|1|8|4|9|6|7|12|0|0|9|7|9|10|1|1	0.96	1	0.96	1	0.96	4.77	0
F508	SLC25A13	SLC25A13	255|265|170	690	230	3	42|22|16|24|21|24|20|17|19|21|16|16|11|16|19|16	1	1	1	1	1	11.5	0
F508	UBXN4	UBXN4	75|105|65	245	81.67	3	4|2|3|2|1|2|0|0|5|5|2|3|2|5|3|4	1	1	1	1	1	30.39	0
F508	UFL1	UFL1	15|25|10	50	16.67	3	7|4|1|0|2|3|5|3|8|7|1|0|2|2|6|6	0.88	1	0.88	1	0.88	4.68	0.01
F508	C20orf3	C20orf3	20|20|5	45	15	3	3|2|0|1|1|0|0|0|0|0|0|2|0|0|0|0	0.99	1	0.99	1	0.99	26.67	0
F508	LRRC47	LRRC47	35|60|10	105	35	3	4|0|0|2|0|1|1|2|4|6|0|0|0|2|0|1	1	1	1	1	1	24.35	0
F508	TECR	TECR	65|55|35	155	51.67	3	5|1|6|9|6|7|5|3|1|1|8|8|10|10|6|6	1	1	1	1	1	8.99	0
F508	NUP62	NUP62	65|80|60	205	68.33	3	17|10|22|24|20|12|12|11|14|17|22|23|20|23|9|2	1	1	1	1	1	4.24	0
F508	COX2	COX2	55|70|60	185	61.67	3	18|6|7|4|11|9|3|5|10|6|2|7|8|6|4|9	1	1	1	1	1	8.58	0
F508	ALDH1B1	ALDH1B1	25|20|25	70	23.33	3	5|3|5|3|3|2|1|2|2|2|3|1|1|4|0|1	1	1	1	1	1	9.82	0
F508	ECI2	ECI2	25|20|25	70	23.33	3	5|2|5|5|2|2|2|0|0|0|4|4|4|5|2|2	1	1	1	1	1	8.48	0
F508	NDUFA13	NDUFA13	55|55|65	175	58.33	3	7|1|2|0|0|0|0|0|0|0|5|5|4|6|3|4	1	1	1	1	1	25.23	0
F508	NDUFS2	NDUFS2	45|45|40	130	43.33	3	2|0|1|0|1|0|3|2|1|1|4|2|4|3|2|2	1	1	1	1	1	24.76	0
F508	COX7A2	COX7A2	30|35|30	95	31.67	3	3|0|0|1|0|1|4|4|3|4|2|3|3|3|0|1	1	1	1	1	1	15.83	0
F508	LEMD3	LEMD3	35|35|40	110	36.67	3	10|5|3|4|2|2|10|13|16|17|2|0|0|2|13|14	0.99	1	0.99	1	0.99	5.19	0
F508	TMEM48	TMEM48	25|15|20	60	20	3	1|1|0|0|0|0|1|0|0|1|1|0|3|5|0|0	1	1	1	1	1	24.62	0
F508	MRPL12	MRPL12	20|15|25	60	20	3	0|2|0|0|0|0|0|0|0|0|0|0|0|0|0|0	1	1	1	1	1	160	0
F508	SMARCB1	SMARCB1	15|5|10	30	10	3	1|0|0|0|0|0|0|0|0|0|0|0|0|0|0|0	1	1	1	1	1	100	0
F508	MMGT1	MMGT1	30|25|25	80	26.67	3	0|0|0|0|0|0|0|0|0|0|0|0|0|0|0|0	1	1	1	1	1	266.67	0
F508	SRPRB	SRPRB	45|40|40	125	41.67	3	4|0|1|1|3|1|4|7|7|8|5|5|5|7|6|3	1	1	1	1	1	9.95	0
F508	GPD2	GPD2	15|10|35	60	20	3	3|4|0|2|1|1|0|0|0|0|0|0|0|0|0|0	1	1	1	1	1	29.09	0
F508	PSMD11	PSMD11	70|75|25	170	56.67	3	10|5|9|7|8|5|4|6|9|9|4|6|7|7|12|14	1	1	1	1	1	7.43	0
F508	RFC2	RFC2	25|15|10	50	16.67	3	8|5|6|6|4|4|5|3|1|0|3|5|7|5|2|3	0.81	1	0.81	1	0.81	3.98	0.01
F508	LDHB	LDHB	75|80|20	175	58.33	3	12|3|7|5|5|6|6|4|9|8|8|8|7|3|3|5	1	1	1	1	1	9.43	0
F508	PGRMC2	PGRMC2	140|125|135	400	133.33	3	21|2|7|5|7|10|8|10|24|23|8|10|13|11|21|23	1	1	1	1	1	10.51	0
F508	CBS	CBS	20|15|20	55	18.33	3	10|2|7|6|8|4|7|5|11|9|4|2|6|6|3|3	0.86	1	0.86	1	0.86	3.15	0.01
F508	NDUFAF2	NDUFAF2	15|5|5	25	8.33	3	1|0|0|0|0|0|0|1|0|0|0|0|0|0|0|0	1	1	1	1	1	66.67	0
F508	EIF2S2	EIF2S2	55|50|100	205	68.33	3	10|5|9|6|5|9|11|10|18|14|7|7|7|8|7|10	1	1	1	1	1	7.65	0
F508	SLC33A1	SLC33A1	15|25|10	50	16.67	3	1|0|0|0|0|0|1|0|0|2|0|0|0|0|1|1	1	1	1	1	1	44.44	0
F508	PSME2	PSME2	60|35|5	100	33.33	3	6|2|3|5|0|1|0|2|0|0|4|1|5|7|0|0	0.79	1	0.79	1	0.79	14.81	0.01
F508	AGPAT6	AGPAT6	55|20|10	85	28.33	3	0|0|0|0|0|0|0|1|0|0|0|0|0|0|0|0	1	1	1	1	1	283.33	0
F508	GSR	GSR	20|50|25	95	31.67	3	0|0|0|0|0|0|0|0|0|0|0|0|0|0|0|0	1	1	1	1	1	316.67	0
F508	STT3B	STT3B	70|55|40	165	55	3	5|0|6|2|2|2|4|6|0|2|2|3|5|3|0|0	1	1	1	1	1	20.95	0
F508	PSME1	PSME1	55|55|15	125	41.67	3	6|1|2|2|2|0|7|8|11|12|0|0|1|0|1|5	0.98	1	0.98	1	0.98	11.49	0
F508	SRSF7	SRSF7	65|50|55	170	56.67	3	17|1|6|6|12|13|17|20|11|12|11|10|6|9|12|12	1	1	1	1	1	5.18	0
F508	IGF2BP3	IGF2BP3	45|40|60	145	48.33	3	15|14|12|9|16|11|17|11|17|19|16|12|17|17|8|14	1	1	1	1	1	3.44	0
F508	ATP5J2-PTCD1	ATP5J2-PTCD1	75|80|60	215	71.67	3	10|9|9|7|9|7|8|6|4|6|10|8|9|9|0|2	1	1	1	1	1	10.15	0
F508	RPS17	RPS17	95|125|50	270	90	3	13|10|15|13|10|10|12|25|13|9|14|15|13|10|2|0	1	1	1	1	1	7.83	0
F508	ATAD1	ATAD1	25|25|10	60	20	3	4|0|0|3|0|2|0|5|0|3|0|0|0|1|1|2	1	1	1	1	1	15.24	0
F508	FAM158A	FAM158A	115|130|35	280	93.33	3	0|0|0|0|0|0|0|0|0|0|0|0|0|0|0|0	1	1	1	1	1	933.33	0
F508	SLC35F2	SLC35F2	35|15|10	60	20	3	0|0|0|0|0|0|0|0|0|0|0|0|0|0|0|0	1	1	1	1	1	200	0
F508	HSPD1	HSPD1	765|730|315	1810	603.33	3	93|36|57|59|45|50|44|38|10|18|79|74|73|78|22|18	1	1	1	1	1	12.16	0
F508	LRPPRC	LRPPRC	70|70|50	190	63.33	3	13|8|8|13|14|18|1|4|0|1|8|9|12|5|2|3	1	1	1	1	1	8.52	0
F508	NDUFS1	NDUFS1	45|55|25	125	41.67	3	6|0|1|0|3|2|6|3|2|3|3|2|0|6|2|6	1	1	1	1	1	14.81	0
F508	AUP1	AUP1	10|10|5	25	8.33	3	0|0|0|0|0|0|0|0|0|0|0|0|0|0|0|0	1	1	1	1	1	83.33	0
F508	RBM15	RBM15	15|25|30	70	23.33	3	13|0|0|3|4|0|2|8|1|2|2|3|3|5|1|2	0.99	1	0.99	1	0.99	7.62	0
F508	PRDX1	PRDX1	245|245|260	750	250	3	51|8|65|51|50|53|61|63|57|67|80|77|65|66|58|52	1	1	1	1	1	4.33	0
F508	SARNP	SARNP	40|35|20	95	31.67	3	3|1|0|0|0|0|3|5|4|3|1|0|1|0|8|6	1	1	1	1	1	14.48	0
F508	PRDX2	PRDX2	140|150|120	410	136.67	3	37|12|39|39|23|21|49|47|39|45|34|35|35|36|17|30	1	1	1	1	1	4.06	0
F508	PLOD1	PLOD1	10|15|25	50	16.67	3	6|1|7|6|5|4|0|0|0|0|0|2|4|5|0|1	0.97	1	0.97	1	0.97	6.5	0
F508	PPP5C	PPP5C	20|10|10	40	13.33	3	0|0|0|0|0|0|0|0|0|0|0|0|0|0|0|0	1	1	1	1	1	133.33	0
F508	SERPINH1	SERPINH1	105|120|65	290	96.67	3	19|4|14|10|13|12|10|10|10|8|24|30|24|27|16|17	1	1	1	1	1	6.24	0
F508	PRDX3	PRDX3	90|100|170	360	120	3	14|6|7|8|13|6|7|12|3|3|6|4|8|7|2|5	1	1	1	1	1	17.3	0
F508	SSR4	SSR4	75|70|30	175	58.33	3	19|4|5|5|9|1|3|9|7|8|13|10|12|10|6|8	1	1	1	1	1	7.24	0
F508	PCNA	PCNA	75|50|85	210	70	3	7|2|5|3|8|4|14|9|6|11|2|3|2|2|5|3	1	1	1	1	1	13.02	0
F508	RBM39	RBM39	160|155|80	395	131.67	3	32|13|16|9|12|12|35|34|47|32|20|16|16|13|13|22	0.99	1	0.99	1	0.99	6.16	0
F508	MYEF2	MYEF2	15|15|10	40	13.33	3	5|0|1|0|0|1|0|0|2|0|1|0|0|0|1|0	1	1	1	1	1	19.39	0
F508	TIMM44	TIMM44	55|75|20	150	50	3	4|3|4|4|8|4|4|4|2|5|3|3|5|4|1|1	1	1	1	1	1	13.56	0
F508	ZNF326	ZNF326	25|20|60	105	35	3	5|0|4|8|2|2|5|4|5|8|9|5|7|10|4|4	1	1	1	1	1	6.83	0
F508	RAB7A	RAB7A	135|130|150	415	138.33	3	12|5|6|4|2|0|3|7|6|4|8|3|6|6|3|4	1	1	1	1	1	28.02	0
F508	TUFM	TUFM	350|390|330	1070	356.67	3	52|13|40|39|45|35|52|44|47|54|72|72|67|53|25|32	1	1	1	1	1	7.69	0
F508	PRPSAP2	PRPSAP2	20|15|30	65	21.67	3	6|2|1|0|2|0|3|6|5|4|3|4|6|6|0|4	1	1	1	1	1	6.67	0
F508	STX5	STX5	45|25|5	75	25	3	1|0|1|0|0|1|0|0|0|4|0|0|0|0|3|2	0.99	1	0.99	1	0.99	33.33	0
F508	LBR	LBR	155|170|135	460	153.33	3	58|33|36|27|33|33|41|51|55|43|40|45|47|48|29|36	1	1	1	1	1	3.75	0
F508	SEC22B	SEC22B	25|40|20	85	28.33	3	8|2|5|5|4|4|4|4|6|5|3|3|4|4|6|6	1	1	1	1	1	6.21	0
F508	HNRNPH1	HNRNPH1	260|260|325	845	281.67	3	55|33|67|62|52|59|40|40|43|45|47|47|38|53|22|27	1	1	1	1	1	6.17	0
F508	SEC23A	SEC23A	35|35|55	125	41.67	3	0|6|7|0|5|0|7|6|8|7|1|2|0|3|6|6	1	1	1	1	1	10.42	0
F508	DDX18	DDX18	90|55|60	205	68.33	3	27|2|13|6|14|8|21|16|15|15|18|12|19|23|14|17	1	1	1	1	1	4.56	0
F508	BSG	BSG	50|45|15	110	36.67	3	7|2|1|2|0|2|3|2|0|1|7|4|5|3|2|3	1	1	1	1	1	13.33	0
F508	TMX3	TMX3	10|10|5	25	8.33	3	0|0|0|0|0|0|0|0|0|0|0|0|0|0|1|0	1	1	1	1	1	83.33	0
F508	DDX52	DDX52	45|30|35	110	36.67	3	7|6|8|0|5|5|11|12|6|8|0|9|2|5|11|8	1	1	1	1	1	5.7	0
F508	LMNB2	LMNB2	60|70|70	200	66.67	3	11|0|2|3|0|3|10|11|5|6|1|0|2|0|0|0	1	1	1	1	1	19.75	0
F508	RPL13A	RPL13A	80|85|115	280	93.33	3	15|11|20|14|12|11|15|14|19|21|29|30|28|21|8|7	1	1	1	1	1	5.43	0
F508	IDI1	IDI1	35|35|20	90	30	3	2|1|0|0|0|2|4|4|2|1|4|6|3|2|0|1	1	1	1	1	1	15	0
F508	LRRC59	LRRC59	100|90|90	280	93.33	3	27|1|13|12|14|12|34|31|18|16|12|10|12|13|16|14	1	1	1	1	1	5.86	0
F508	DARS2	DARS2	85|70|70	225	75	3	4|0|5|10|11|10|2|5|3|3|4|5|5|9|3|0	1	1	1	1	1	15.19	0
F508	ABCB7	ABCB7	20|30|10	60	20	3	3|2|3|0|3|1|0|0|0|1|0|0|0|0|0|0	1	1	1	1	1	24.62	0
F508	SRRM1	SRRM1	35|30|35	100	33.33	3	15|8|3|3|4|6|9|6|0|1|5|4|5|5|2|0	1	1	1	1	1	7.02	0
F508	CEBPZ	CEBPZ	10|20|35	65	21.67	3	16|6|2|3|0|0|0|0|0|1|4|0|0|2|5|4	0.96	1	0.96	1	0.96	8.06	0
F508	AGPS	AGPS	20|30|15	65	21.67	3	4|0|0|0|0|0|0|0|0|0|0|0|0|1|0|2	1	1	1	1	1	49.52	0
F508	AK1	AK1	20|15|5	40	13.33	3	5|1|1|3|1|2|2|0|0|2|3|2|3|3|0|0	0.91	1	0.91	1	0.91	7.62	0
F508	ARF4	ARF4	40|40|35	115	38.33	3	6|0|0|4|4|2|10|7|14|14|14|12|13|12|7|9	1	1	1	1	1	4.79	0
F508	ATP1B3	ATP1B3	45|30|20	95	31.67	3	7|0|3|4|3|1|2|2|2|1|0|2|0|0|0|1	1	1	1	1	1	18.1	0
F508	ATP5O	ATP5O	120|110|65	295	98.33	3	16|6|12|12|11|16|6|5|4|5|6|5|11|13|0|0	1	1	1	1	1	12.29	0
F508	CIRBP	CIRBP	30|50|25	105	35	3	12|9|5|4|4|3|21|15|12|8|7|7|7|5|5|3	0.92	1	0.92	1	0.92	4.41	0
F508	COX4I1	COX4I1	50|45|60	155	51.67	3	4|0|1|0|0|1|4|5|2|2|1|1|2|1|0|1	1	1	1	1	1	33.07	0
F508	CSRP2	CSRP2	15|30|35	80	26.67	3	4|0|2|2|2|3|4|3|5|4|5|6|9|8|0|1	1	1	1	1	1	7.36	0
F508	CSTB	CSTB	70|35|45	150	50	3	4|0|5|3|3|3|9|6|0|0|4|4|2|3|2|2	1	1	1	1	1	16	0
F508	RRP1	RRP1	30|30|25	85	28.33	3	1|0|0|0|0|0|0|1|0|2|0|0|0|0|0|0	1	1	1	1	1	113.33	0
F508	DAD1	DAD1	25|25|45	95	31.67	3	6|0|5|4|4|4|5|4|6|3|3|0|3|2|2|3	1	1	1	1	1	9.38	0
F508	DPM1	DPM1	90|75|80	245	81.67	3	16|8|0|4|7|6|9|7|7|5|9|7|14|9|8|7	1	1	1	1	1	10.62	0
F508	DUT	DUT	55|50|65	170	56.67	3	15|8|6|7|9|2|20|19|21|23|8|9|10|9|15|11	1	1	1	1	1	4.72	0
F508	EEF1G	EEF1G	120|130|100	350	116.67	3	16|6|18|15|15|17|29|29|28|46|28|31|26|31|23|25	1	1	1	1	1	4.87	0
F508	EIF3F	EIF3F	55|45|25	125	41.67	3	11|2|11|7|8|6|11|13|10|12|13|10|13|12|11|15	0.86	1	0.86	1	0.86	4.04	0.01
F508	ETFB	ETFB	20|25|35	80	26.67	3	2|0|0|0|0|0|0|1|1|2|1|1|1|0|1|1	1	1	1	1	1	38.79	0
F508	FKBP4	FKBP4	45|60|75	180	60	3	12|3|11|11|15|7|10|7|8|8|6|8|10|12|5|4	1	1	1	1	1	7.01	0
F508	GALK1	GALK1	45|30|10	85	28.33	3	4|6|3|6|4|2|3|0|1|2|4|2|3|1|2|2	1	1	1	1	1	10.07	0
F508	HADHB	HADHB	85|85|60	230	76.67	3	0|0|0|1|2|0|3|2|0|4|0|2|1|1|0|3	1	1	1	1	1	64.56	0
F508	HPRT1	HPRT1	30|30|25	85	28.33	3	4|2|4|3|6|4|8|5|1|1|5|2|5|3|0|0	1	1	1	1	1	8.55	0
F508	DNAJA1	DNAJA1	85|65|40	190	63.33	3	14|4|11|6|7|6|13|8|11|9|8|5|10|8|7|12	1	1	1	1	1	7.29	0
F508	HSPB1	HSPB1	25|35|10	70	23.33	3	0|0|1|0|2|2|0|0|0|0|4|4|5|3|3|3	1	1	1	1	1	13.83	0
F508	KPNA2	KPNA2	95|115|50	260	86.67	3	21|8|13|7|10|7|3|3|1|2|8|3|7|9|12|11	1	1	1	1	1	11.09	0
F508	PHB	PHB	220|180|180	580	193.33	3	33|15|24|24|26|25|29|17|19|17|47|42|38|36|17|17	1	1	1	1	1	7.26	0
F508	POLR2B	POLR2B	20|10|20	50	16.67	3	3|1|3|3|3|7|6|5|4|6|6|5|2|3|5|5	0.79	1	0.79	1	0.79	3.98	0.01
F508	PTPN1	PTPN1	95|70|90	255	85	3	17|0|4|1|5|2|8|5|11|18|5|7|7|7|14|11	1	1	1	1	1	11.15	0
F508	RANBP1	RANBP1	65|60|45	170	56.67	3	21|0|14|7|11|9|6|9|16|17|9|8|8|10|12|14	1	1	1	1	1	5.3	0
F508	RPL12	RPL12	75|85|60	220	73.33	3	21|4|22|12|18|20|27|20|17|15|24|23|24|24|18|21	1	1	1	1	1	3.78	0
F508	RPL24	RPL24	85|85|145	315	105	3	15|0|17|11|20|22|15|16|16|17|24|22|19|22|11|16	1	1	1	1	1	6.39	0
F508	RPL26	RPL26	50|55|30	135	45	3	9|0|7|8|8|8|9|8|9|8|11|12|13|12|9|12	1	1	1	1	1	5.03	0
F508	RPL27A	RPL27A	50|35|65	150	50	3	8|0|6|5|8|7|7|9|5|4|10|9|11|11|7|6	1	1	1	1	1	7.08	0
F508	RPL30	RPL30	20|15|15	50	16.67	3	9|2|5|5|5|6|6|5|6|9|5|6|8|7|4|3	0.82	1	0.82	1	0.82	2.93	0.01
F508	RPL32	RPL32	35|25|25	85	28.33	3	5|0|4|3|5|3|5|6|6|5|7|4|6|5|4|4	1	1	1	1	1	6.3	0
F508	RPL38	RPL38	85|95|50	230	76.67	3	13|0|11|9|6|9|6|9|3|3|15|18|14|14|7|7	1	1	1	1	1	8.52	0
F508	RPN1	RPN1	160|170|120	450	150	3	29|5|22|18|21|9|20|22|25|20|20|29|22|20|17|13	1	1	1	1	1	7.69	0
F508	RPS11	RPS11	80|40|60	180	60	3	10|2|10|8|10|13|9|9|10|14|8|10|10|7|5|6	1	1	1	1	1	6.81	0
F508	RPS15	RPS15	165|235|100	500	166.67	3	28|29|19|14|17|15|41|41|18|27|15|12|14|17|4|6	1	1	1	1	1	8.41	0
F508	RPS16	RPS16	140|160|125	425	141.67	3	22|3|19|20|16|21|24|19|19|21|30|32|30|28|9|12	1	1	1	1	1	6.97	0
F508	RPS19	RPS19	80|65|80	225	75	3	7|0|7|5|6|6|5|4|2|1|8|5|8|8|4|4	1	1	1	1	1	15	0
F508	RPS21	RPS21	40|40|40	120	40	3	4|4|4|2|4|6|7|7|8|7|4|5|5|6|5|5	1	1	1	1	1	7.71	0
F508	RPS23	RPS23	35|35|65	135	45	3	8|4|8|5|5|7|5|3|5|5|13|13|12|7|8|6	1	1	1	1	1	6.32	0
F508	RPS25	RPS25	30|50|60	140	46.67	3	10|3|9|10|8|10|12|15|10|11|0|0|3|3|9|10	1	1	1	1	1	6.07	0
F508	RPS8	RPS8	165|175|175	515	171.67	3	39|3|48|45|43|30|39|38|44|38|54|53|49|49|35|33	1	1	1	1	1	4.29	0
F508	RRM1	RRM1	15|20|35	70	23.33	3	1|0|0|0|0|0|1|0|2|2|0|3|1|2|0|0	1	1	1	1	1	31.11	0
F508	HSP90B1	HSP90B1	125|115|115	355	118.33	3	23|3|15|16|25|20|11|12|4|5|35|32|35|32|2|2	1	1	1	1	1	6.96	0
F508	TTC1	TTC1	10|20|15	45	15	3	2|1|0|0|0|1|2|3|4|4|2|1|0|2|2|1	1	1	1	1	1	9.6	0
F508	UMPS	UMPS	30|20|10	60	20	3	1|0|0|1|0|0|0|0|0|0|0|1|0|0|0|2	1	1	1	1	1	64	0
F508	VDAC1	VDAC1	205|215|180	600	200	3	35|2|28|20|23|26|38|38|29|43|47|36|32|45|23|22	1	1	1	1	1	6.57	0
F508	VRK1	VRK1	50|65|55	170	56.67	3	15|6|3|5|2|0|17|10|6|7|5|6|4|4|1|3	1	1	1	1	1	9.65	0
F508	YARS	YARS	190|170|100	460	153.33	3	23|6|16|24|24|20|19|16|15|18|32|29|26|32|4|6	1	1	1	1	1	7.91	0
F508	ESYT2	ESYT2	45|30|25	100	33.33	3	16|4|6|5|7|7|5|7|15|9|3|5|0|5|10|9	0.99	1	0.99	1	0.99	4.72	0
F508	C19orf70	C19orf70	35|30|15	80	26.67	3	8|6|5|4|0|0|0|0|0|0|3|5|5|6|0|0	0.99	1	0.99	1	0.99	10.16	0
F508	DARS	DARS	95|85|100	280	93.33	3	29|0|18|19|14|17|21|19|13|16|22|20|24|26|8|13	1	1	1	1	1	5.35	0
F508	ACAT1	ACAT1	50|35|35	120	40	3	12|5|13|14|10|11|12|13|6|7|10|6|13|10|3|2	1	1	1	1	1	4.35	0
F508	ALDH3A2	ALDH3A2	110|125|145	380	126.67	3	16|7|11|9|13|11|19|27|23|20|18|16|12|15|10|12	1	1	1	1	1	8.48	0
F508	CSTF3	CSTF3	20|10|10	40	13.33	3	1|0|0|0|1|0|0|0|2|3|0|0|2|0|0|1	1	1	1	1	1	21.33	0
F508	CTBP1	CTBP1	15|35|15	65	21.67	3	4|0|0|1|0|0|1|0|0|0|0|0|1|0|1|2	1	1	1	1	1	34.67	0
F508	EMD	EMD	145|190|155	490	163.33	3	16|11|14|16|11|13|15|15|21|22|10|10|14|11|15|14	1	1	1	1	1	11.46	0
F508	C19orf63	C19orf63	40|40|55	135	45	3	0|0|0|0|0|0|0|0|0|0|0|0|0|0|0|0	1	1	1	1	1	450	0
F508	UQCRC1	UQCRC1	25|25|15	65	21.67	3	3|0|1|0|0|2|0|0|0|0|2|4|5|6|0|0	1	1	1	1	1	15.07	0
F508	IARS2	IARS2	30|35|30	95	31.67	3	4|3|3|2|3|4|4|6|5|5|0|0|2|0|0|0	1	1	1	1	1	12.36	0
F508	ARHGAP1	ARHGAP1	40|30|20	90	30	3	2|0|0|0|0|2|2|4|9|9|0|0|0|0|7|7	1	1	1	1	1	11.43	0
F508	BAG2	BAG2	25|15|35	75	25	3	5|1|12|5|6|3|2|5|5|6|5|4|3|6|6|5	0.99	1	0.99	1	0.99	5.06	0
F508	DDX5	DDX5	275|295|335	905	301.67	3	64|31|53|47|51|48|76|71|88|82|61|67|52|58|56|57	1	1	1	1	1	5.02	0
F508	EIF2S1	EIF2S1	75|50|75	200	66.67	3	9|3|4|4|6|3|12|12|8|9|5|4|8|5|4|7	1	1	1	1	1	10.36	0
F508	FARSA	FARSA	80|65|55	200	66.67	3	29|7|21|18|19|15|20|19|17|28|8|11|9|14|10|5	1	1	1	1	1	4.27	0
F508	PRDX6	PRDX6	160|140|210	510	170	3	34|9|15|24|19|19|47|42|61|47|21|21|24|17|19|25	1	1	1	1	1	6.13	0
F508	NDUFA10	NDUFA10	60|35|35	130	43.33	3	7|3|6|3|8|6|5|1|0|0|10|12|12|10|7|9	1	1	1	1	1	7	0
F508	NDUFS3	NDUFS3	80|50|55	185	61.67	3	10|3|5|2|3|6|3|4|2|4|7|5|10|6|3|6	1	1	1	1	1	12.49	0
F508	TXNL1	TXNL1	320|285|360	965	321.67	3	34|9|56|56|63|56|3|1|0|1|111|102|98|99|0|6	1	1	1	1	1	7.41	0
F508	NDUFB8	NDUFB8	10|5|10	25	8.33	3	0|0|0|0|0|0|0|0|0|0|0|0|0|0|0|0	1	1	1	1	1	83.33	0
F508	TIMM50	TIMM50	85|120|85	290	96.67	3	29|3|20|20|24|14|13|21|21|15|27|22|23|26|15|19	1	1	1	1	1	4.96	0
F508	SMC3	SMC3	105|100|70	275	91.67	3	29|9|21|21|21|17|18|17|17|11|16|21|21|19|19|26	1	1	1	1	1	4.84	0
F508	RPL7L1	RPL7L1	65|55|65	185	61.67	3	9|5|5|5|4|3|5|6|1|3|8|5|6|8|5|5	1	1	1	1	1	11.89	0
F508	CFL1	CFL1	125|105|120	350	116.67	3	37|19|21|17|27|21|36|44|31|32|31|28|29|30|18|24	1	1	1	1	1	4.19	0
F508	DNAJA2	DNAJA2	80|75|30	185	61.67	3	14|7|6|12|4|3|11|10|21|18|7|12|9|7|10|9	0.93	1	0.93	1	0.93	6.17	0
F508	LMAN1	LMAN1	15|30|15	60	20	3	2|0|1|0|0|0|0|0|1|0|0|0|2|0|2|0	1	1	1	1	1	40	0
F508	PDIA6	PDIA6	210|185|135	530	176.67	3	33|15|27|13|21|21|12|9|4|3|15|11|16|14|12|10	1	1	1	1	1	11.98	0
F508	NAMPT	NAMPT	255|200|90	545	181.67	3	40|16|26|21|21|25|19|22|15|15|28|27|30|32|13|12	1	1	1	1	1	8.03	0
F508	RHEB	RHEB	55|45|30	130	43.33	3	8|0|10|5|9|8|5|9|4|5|4|6|5|6|6|6	1	1	1	1	1	7.22	0
F508	ATP5H	ATP5H	120|120|65	305	101.67	3	16|9|5|11|8|10|6|7|0|0|7|10|9|9|0|0	1	1	1	1	1	15.2	0
F508	CLPP	CLPP	30|20|15	65	21.67	3	5|0|6|0|7|3|0|0|1|0|4|5|3|3|1|0	1	1	1	1	1	9.12	0
F508	GNB2L1	GNB2L1	190|205|170	565	188.33	3	60|13|47|41|50|34|26|34|48|45|63|60|57|55|34|32	1	1	1	1	1	4.31	0
F508	COX4NB	COX4NB	170|135|80	385	128.33	3	1|0|0|1|0|0|0|1|0|0|1|1|0|0|2|0	1	1	1	1	1	293.33	0
F508	FKBP8	FKBP8	40|25|50	115	38.33	3	7|0|6|0|5|7|2|4|2|2|3|1|1|0|0|1	1	1	1	1	1	14.96	0
F508	PSMD4	PSMD4	65|70|50	185	61.67	3	15|5|11|10|11|6|8|8|14|17|10|15|15|12|10|11	1	1	1	1	1	5.54	0
F508	SCD	SCD	15|10|10	35	11.67	3	0|0|0|0|0|1|1|1|1|1|1|1|0|0|4|3	1	1	1	1	1	13.33	0
F508	ARL6IP5	ARL6IP5	100|85|40	225	75	3	9|1|6|3|3|2|4|2|3|3|0|0|0|0|2|2	1	1	1	1	1	30	0
F508	HELZ	HELZ	15|15|25	55	18.33	3	3|1|5|8|5|6|3|1|4|4|2|5|4|8|1|0	1	1	1	1	1	4.89	0
F508	RBM25	RBM25	25|10|70	105	35	3	8|4|5|2|4|0|2|0|0|2|4|5|3|3|2|0	0.98	1	0.98	1	0.98	12.73	0
F508	NCL	NCL	270|260|195	725	241.67	3	53|26|47|47|39|37|72|71|62|69|62|57|63|57|36|37	1	1	1	1	1	4.63	0
F508	HNRNPAB	HNRNPAB	60|70|70	200	66.67	3	26|13|22|25|11|16|32|31|15|13|17|20|18|20|7|9	0.98	1	0.98	1	0.98	3.62	0
F508	STUB1	STUB1	70|60|30	160	53.33	3	6|5|12|10|10|9|3|5|11|12|4|6|8|6|5|6	1	1	1	1	1	7.23	0
F508	PGRMC1	PGRMC1	45|30|100	175	58.33	3	12|4|10|6|5|7|10|7|3|4|16|12|15|11|2|5	1	1	1	1	1	7.24	0
F508	YKT6	YKT6	125|115|120	360	120	3	25|2|8|4|6|8|35|34|22|29|9|9|12|12|38|40	1	1	1	1	1	6.55	0
F508	HNRNPA0	HNRNPA0	120|130|55	305	101.67	3	24|0|17|19|17|10|21|20|14|16|20|21|21|24|13|15	1	1	1	1	1	5.98	0
F508	TMED2	TMED2	15|10|15	40	13.33	3	3|0|0|1|0|0|0|0|0|0|1|0|0|0|0|0	1	1	1	1	1	42.67	0
F508	SEC61B	SEC61B	15|10|5	30	10	3	0|0|0|1|0|0|0|0|0|0|0|0|0|0|0|0	1	1	1	1	1	100	0
F508	SF3A3	SF3A3	65|65|35	165	55	3	14|0|10|6|9|5|15|12|19|14|11|10|16|11|8|11	1	1	1	1	1	5.15	0
F508	STIP1	STIP1	50|40|45	135	45	3	7|0|6|6|6|3|5|4|9|12|13|11|9|11|8|6	1	1	1	1	1	6.21	0
F508	CDC37	CDC37	40|40|35	115	38.33	3	12|8|12|16|12|16|7|10|24|23|9|9|11|11|7|4	0.84	0.98	0.84	0.98	0.84	3.21	0.01
F508	RPSA	RPSA	60|85|105	250	83.33	3	11|1|6|7|11|7|12|8|10|10|7|4|6|4|9|8	1	1	1	1	1	11.02	0
F508	PRAF2	PRAF2	40|40|25	105	35	3	2|0|3|0|1|2|0|0|0|0|1|1|1|3|0|0	1	1	1	1	1	40	0
F508	PROSC	PROSC	15|15|20	50	16.67	3	2|2|1|0|0|0|7|5|2|4|2|1|3|4|0|3	1	1	1	1	1	7.41	0
F508	SEC63	SEC63	90|85|20	195	65	3	8|0|0|0|2|3|6|2|1|1|5|4|3|4|10|8	1	1	1	1	1	18.25	0
F508	SLC3A2	SLC3A2	70|45|50	165	55	3	3|1|1|1|0|0|2|2|0|2|0|0|0|0|4|2	1	1	1	1	1	48.89	0
F508	VMA21	VMA21	75|50|25	150	50	3	0|0|0|0|0|0|0|0|1|1|0|0|0|0|0|0	1	1	1	1	1	400	0
F508	SRM	SRM	30|25|25	80	26.67	3	6|0|4|0|5|9|1|3|0|0|4|3|3|2|5|5	1	1	1	1	1	8.53	0
F508	TMEM209	TMEM209	10|5|15	30	10	3	0|0|0|0|0|0|0|0|0|0|0|2|0|0|0|0	1	1	1	1	1	80	0
F508	TARDBP	TARDBP	90|100|60	250	83.33	3	23|10|9|11|16|15|18|14|14|18|11|12|13|9|8|9	1	1	1	1	1	6.35	0
F508	NDUFA9	NDUFA9	55|35|25	115	38.33	3	14|7|4|13|13|10|9|7|5|6|7|9|10|13|7|6	1	1	1	1	1	4.38	0
F508	IMPDH2	IMPDH2	20|20|50	90	30	3	3|0|5|5|5|4|1|4|1|0|2|2|6|5|0|2	1	1	1	1	1	10.67	0
F508	AHSA1	AHSA1	160|145|85	390	130	3	27|7|17|10|24|21|24|26|35|33|30|25|24|25|42|38	0.99	1	0.99	1	0.99	5.1	0
F508	LETM1	LETM1	25|30|15	70	23.33	3	0|0|0|0|0|0|0|0|0|0|0|0|0|0|0|0	1	1	1	1	1	233.33	0
F508	PUS1	PUS1	30|25|15	70	23.33	3	6|2|7|6|6|3|7|3|6|7|5|6|4|4|2|1	0.99	1	0.99	1	0.99	4.98	0
F508	PREB	PREB	50|70|65	185	61.67	3	6|0|0|0|0|0|0|2|0|5|0|0|0|0|0|1	1	1	1	1	1	70.48	0
F508	CLPX	CLPX	55|70|10	135	45	3	6|1|0|4|4|4|2|3|2|2|4|0|0|2|0|0	0.99	1	0.99	1	0.99	21.18	0
F508	STOML2	STOML2	85|105|65	255	85	3	17|9|7|13|6|9|4|8|1|1|10|9|9|9|0|1	1	1	1	1	1	12.04	0
F508	HEATR1	HEATR1	25|20|15	60	20	3	13|12|4|4|7|5|6|6|6|6|4|3|4|4|7|5	0.81	1	0.81	1	0.81	3.33	0.01
F508	HNRNPH2	HNRNPH2	100|90|80	270	90	3	17|12|26|21|17|18|1|10|0|11|12|15|12|15|0|0	1	1	1	1	1	7.7	0
F508	MCM6	MCM6	115|130|65	310	103.33	3	23|8|16|9|8|14|30|29|24|26|23|22|17|24|20|20	1	1	1	1	1	5.28	0
F508	DIMT1	DIMT1	45|40|20	105	35	3	2|0|2|2|5|2|6|1|0|0|5|2|3|0|2|0	1	1	1	1	1	17.5	0
F508	MTCH2	MTCH2	35|30|35	100	33.33	3	9|8|8|10|10|8|0|0|1|0|2|0|0|3|0|3	1	1	1	1	1	8.6	0
F508	SEC11A	SEC11A	45|20|40	105	35	3	4|5|6|0|0|0|5|1|3|4|0|0|0|2|2|3	1	1	1	1	1	16	0
F508	TTC35	TTC35	245|225|200	670	223.33	3	3|5|0|0|0|0|0|0|3|5|2|0|0|1|2|2	1	1	1	1	1	155.36	0
F508	PSMD6	PSMD6	45|75|30	150	50	3	10|2|2|7|6|2|4|5|7|7|2|5|6|6|4|4	1	1	1	1	1	10.13	0
F508	EIF4A3	EIF4A3	150|100|65	315	105	3	33|15|24|22|20|20|23|27|22|22|34|25|32|24|13|7	0.79	1	0.79	1	0.79	4.63	0.01
F508	RAB21	RAB21	35|60|40	135	45	3	11|3|6|5|4|5|3|7|12|12|7|7|6|6|3|1	1	1	1	1	1	7.35	0
F508	TTC37	TTC37	25|15|5	45	15	3	3|0|2|3|1|1|5|4|3|1|3|3|1|0|0|1	0.87	1	0.87	1	0.87	7.74	0.01
F508	NSA2	NSA2	25|25|25	75	25	3	2|0|0|0|0|0|1|1|1|2|3|3|3|1|2|2	1	1	1	1	1	19.05	0
F508	TXNDC12	TXNDC12	15|25|85	125	41.67	3	7|0|2|1|0|0|6|2|0|0|0|0|0|0|0|0	1	1	1	1	1	37.04	0
F508	HSD17B12	HSD17B12	70|80|60	210	70	3	18|8|6|4|6|7|7|7|10|11|20|19|19|15|11|12	1	1	1	1	1	6.22	0
F508	TMEM85	TMEM85	70|75|60	205	68.33	3	0|0|0|0|0|0|0|0|0|0|0|0|0|0|0|0	1	1	1	1	1	683.33	0
F508	NOP58	NOP58	140|80|75	295	98.33	3	34|18|17|12|17|18|23|22|17|14|28|24|32|30|14|10	1	1	1	1	1	4.77	0
F508	DHRS7	DHRS7	70|80|55	205	68.33	3	0|0|0|0|0|0|0|0|0|0|0|0|0|0|2|3	1	1	1	1	1	218.67	0
F508	SF3B14	SF3B14	25|35|25	85	28.33	3	10|1|5|5|5|1|8|8|13|15|8|8|6|11|6|13	0.97	1	0.97	1	0.97	3.69	0
F508	DNAJB11	DNAJB11	35|25|20	80	26.67	3	2|0|0|0|0|0|0|0|1|1|0|1|0|1|0|1	1	1	1	1	1	60.95	0
F508	RPL14	RPL14	35|45|55	135	45	3	11|0|12|9|8|9|15|10|17|14|11|12|12|9|13|14	1	1	1	1	1	4.09	0
F508	ACOT9	ACOT9	75|30|40	145	48.33	3	14|9|7|4|7|8|6|2|3|2|8|5|9|7|2|1	1	1	1	1	1	8.23	0
F508	STAU1	STAU1	20|25|25	70	23.33	3	9|5|6|8|4|7|13|13|9|9|11|7|10|10|3|5	0.85	1	0.85	1	0.85	2.89	0.01
F508	CYB5B	CYB5B	20|30|5	55	18.33	3	3|2|1|0|0|0|0|0|0|0|1|0|0|0|1|0	1	1	1	1	1	36.67	0
F508	SRSF5	SRSF5	15|10|25	50	16.67	3	2|0|0|1|0|0|0|0|0|0|0|0|0|0|0|0	1	1	1	1	1	88.89	0
F508	TMEM38B	TMEM38B	20|10|10	40	13.33	3	1|1|0|0|0|0|1|1|0|0|0|0|0|0|0|0	1	1	1	1	1	53.33	0
F508	TMEM111	TMEM111	210|260|175	645	215	3	3|1|0|0|0|0|1|0|7|4|1|0|0|1|2|1	1	1	1	1	1	163.81	0
F508	PRPF4B	PRPF4B	15|10|20	45	15	3	8|0|0|0|2|0|3|3|2|2|0|0|2|2|0|0	0.99	1	0.99	1	0.99	10	0
F508	CDKAL1	CDKAL1	60|50|55	165	55	3	6|1|2|0|1|2|4|3|9|6|0|0|0|0|5|6	1	1	1	1	1	19.56	0
F508	YARS2	YARS2	35|40|25	100	33.33	3	13|8|4|2|5|4|2|7|5|3|7|3|3|3|2|0	1	1	1	1	1	7.51	0
F508	CNP	CNP	20|30|20	70	23.33	3	4|0|4|5|2|0|1|1|2|0|0|3|2|4|3|0	1	1	1	1	1	12.04	0
F508	TMED10	TMED10	40|50|40	130	43.33	3	5|1|1|1|0|0|2|3|3|2|1|3|2|4|0|0	1	1	1	1	1	24.76	0
F508	C15orf24	C15orf24	145|175|110	430	143.33	3	1|0|0|0|0|0|0|0|0|0|0|0|0|0|0|0	1	1	1	1	1	1433.33	0
F508	TOMM22	TOMM22	170|135|95	400	133.33	3	39|19|12|24|38|33|22|15|19|26|22|18|23|24|19|27	1	1	1	1	1	5.61	0
F508	SMPD4	SMPD4	20|15|5	40	13.33	3	0|0|0|0|0|0|1|0|0|0|0|0|0|0|2|0	1	1	1	1	1	71.11	0
F508	HIST1H3F	HIST1H3F	15|25|40	80	26.67	3	6|6|0|3|10|7|12|14|0|2|0|2|0|2|6|5	0.92	1	0.92	1	0.92	5.69	0
F508	PPIA	PPIA	70|80|85	235	78.33	3	9|1|13|9|13|13|14|14|14|16|14|10|15|11|6|8	1	1	1	1	1	6.96	0
F508	PFKP	PFKP	85|135|110	330	110	3	29|5|17|17|19|16|13|14|21|20|27|27|26|24|19|15	1	1	1	1	1	5.7	0
F508	CLCC1	CLCC1	35|40|25	100	33.33	3	1|1|0|0|0|0|0|0|0|0|3|2|5|2|0|0	1	1	1	1	1	38.1	0
F508	LUC7L2	LUC7L2	20|15|15	50	16.67	3	9|1|6|3|5|6|8|7|6|6|2|4|2|3|4|1	0.99	1	0.99	1	0.99	3.65	0
F508	HNRNPC	HNRNPC	130|145|175	450	150	3	32|0|25|21|23|18|36|47|21|26|22|25|23|27|25|23	1	1	1	1	1	6.09	0
F508	GNAS	GNAS	50|80|60	190	63.33	3	7|0|2|3|5|4|5|5|5|3|3|5|6|7|10|6	1	1	1	1	1	13.33	0
F508	ARCN1	ARCN1	55|50|65	170	56.67	3	21|7|13|13|14|12|19|23|27|27|9|11|12|14|22|19	0.95	1	0.95	1	0.95	3.45	0
F508	OCIAD1	OCIAD1	25|15|35	75	25	3	4|4|0|1|1|0|10|5|10|13|1|1|0|1|8|7	0.96	1	0.96	1	0.96	6.06	0
F508	MYH9	MYH9	500|375|80	955	318.33	3	29|11|28|26|28|10|22|24|46|50|10|14|18|10|11|19	0.95	1	0.95	1	0.95	14.31	0
F508	MYH10	MYH10	430|385|25	840	280	3	0|0|4|5|0|0|0|0|0|0|0|0|0|0|0|0	1	1	1	1	1	497.78	0
F508	AAAS	AAAS	35|45|20	100	33.33	3	2|0|3|2|5|2|2|4|1|2|0|2|2|2|1|2	1	1	1	1	1	16.67	0
F508	TUBB2B	TUBB2B	185|155|60	400	133.33	3	11|0|12|7|12|14|25|15|17|19|14|9|14|12|23|21	1	1	1	1	1	9.48	0
F508	RPS26	RPS26	45|50|40	135	45	3	13|8|12|10|13|10|9|9|11|11|12|15|13|8|5|7	1	1	1	1	1	4.34	0
F508	HSP90AA1	HSP90AA1	545|520|395	1460	486.67	3	83|7|70|63|57|66|70|74|38|34|67|62|72|62|35|31	1	1	1	1	1	8.74	0
F508	RPL13	RPL13	80|55|85	220	73.33	3	8|5|11|13|11|10|9|8|7|6|16|21|15|14|10|8	1	1	1	1	1	6.82	0
F508	IMMT	IMMT	55|40|20	115	38.33	3	4|1|4|4|6|5|0|0|0|1|2|2|2|5|0|2	1	1	1	1	1	16.14	0
F508	SLC25A5	SLC25A5	140|145|190	475	158.33	3	34|3|37|27|36|34|26|25|34|36|50|43|41|44|53|57	1	1	1	1	1	4.37	0
F508	SLC25A4	SLC25A4	40|65|85	190	63.33	3	4|2|3|2|5|3|2|6|0|0|4|3|4|3|4|0	1	1	1	1	1	22.52	0
F508	PDHB	PDHB	25|30|45	100	33.33	3	12|2|6|7|8|6|8|10|7|2|7|6|8|7|5|5	1	1	1	1	1	5.03	0
F508	RPS3	RPS3	380|405|370	1155	385	3	83|11|77|64|70|54|55|62|72|70|98|88|88|84|78|78	1	1	1	1	1	5.44	0
F508	MYL12B	MYL12B	45|50|40	135	45	3	19|6|7|8|13|8|17|16|14|14|9|9|10|9|8|11	1	1	1	1	1	4.04	0
F508	NPEPPS	NPEPPS	180|170|100	450	150	3	28|5|9|9|12|15|13|14|10|11|12|15|11|10|16|16	1	1	1	1	1	11.65	0
F508	HK1	HK1	25|45|25	95	31.67	3	13|6|4|6|9|11|7|8|5|10|12|7|8|9|9|5	1	1	1	1	1	3.93	0
F508	TRIM13	TRIM13	45|80|45	170	56.67	3	0|0|0|0|0|0|0|0|0|0|0|0|0|0|0|0	1	1	1	1	1	566.67	0
F508	TACC1	TACC1	50|55|20	125	41.67	3	14|0|7|7|8|10|2|3|7|9|6|3|1|4|10|11	0.95	1	0.95	1	0.95	6.54	0
F508	TSFM	TSFM	25|25|30	80	26.67	3	10|0|6|0|7|6|2|3|0|1|9|4|3|9|0|0	1	1	1	1	1	7.11	0
F508	DNAJB6	DNAJB6	40|20|50	110	36.67	3	3|0|1|1|5|4|2|2|1|0|2|2|1|2|4|2	1	1	1	1	1	18.33	0
F508	MYL6	MYL6	50|50|30	130	43.33	3	7|4|9|6|2|3|2|0|3|0|3|6|3|4|2|2	1	1	1	1	1	12.38	0
F508	TUBA1A	TUBA1A	45|40|285	370	123.33	3	1|4|6|3|1|1|1|2|0|1|0|0|6|6|0|0	1	1	1	1	1	61.67	0
F508	OSBPL8	OSBPL8	75|65|45	185	61.67	3	20|2|4|9|9|5|6|5|6|8|13|13|15|12|4|3	1	1	1	1	1	7.36	0
F508	CSK	CSK	35|25|20	80	26.67	3	6|3|2|2|3|2|9|7|4|5|3|3|5|6|6|0	1	1	1	1	1	6.46	0
F508	GK	GK	25|20|15	60	20	3	2|0|0|0|0|0|2|0|0|0|0|2|1|0|0|0	1	1	1	1	1	45.71	0
F508	RAB11B	RAB11B	60|70|60	190	63.33	3	4|0|3|3|3|1|4|2|0|0|4|0|5|4|4|7	1	1	1	1	1	23.03	0
F508	GSPT1	GSPT1	35|30|35	100	33.33	3	9|2|8|7|6|7|20|12|13|10|8|8|6|9|8|13	1	1	1	1	1	3.65	0
F508	SMARCC2	SMARCC2	20|15|30	65	21.67	3	7|7|5|3|4|3|4|4|8|6|3|4|4|0|0|0	1	1	1	1	1	5.59	0
F508	VRK2	VRK2	65|70|60	195	65	3	2|0|0|0|0|0|0|0|5|5|0|0|0|0|5|4	1	1	1	1	1	49.52	0
F508	NT5DC2	NT5DC2	40|25|20	85	28.33	3	4|1|6|7|7|7|0|0|1|1|4|3|3|3|0|0	1	1	1	1	1	9.65	0
F508	ITGB1	ITGB1	40|35|25	100	33.33	3	3|0|0|0|0|0|1|0|1|1|0|0|0|0|3|2	1	1	1	1	1	48.48	0
F508	TOP2A	TOP2A	65|90|65	220	73.33	3	20|5|19|8|13|8|14|11|12|17|27|27|31|29|23|33	0.96	1	0.96	1	0.96	3.95	0
F508	RAB14	RAB14	80|65|45	190	63.33	3	13|3|9|7|15|12|3|4|2|3|7|9|7|12|6|9	1	1	1	1	1	8.37	0
F508	RAB1B	RAB1B	95|65|80	240	80	3	18|22|15|13|12|22|23|11|9|6|17|22|18|21|6|0	1	1	1	1	1	5.45	0
F508	RAB34	RAB34	35|25|60	120	40	3	2|3|2|1|1|1|2|4|0|0|0|0|1|2|0|3	1	1	1	1	1	29.09	0
F508	RAB9A	RAB9A	20|20|25	65	21.67	3	6|2|2|3|3|5|1|2|4|4|4|4|4|4|4|2	1	1	1	1	1	6.42	0
F508	RAB3B	RAB3B	10|15|10	35	11.67	3	2|0|0|0|0|0|1|0|0|0|1|3|3|1|0|1	1	1	1	1	1	15.56	0
F508	RAB6A	RAB6A	20|45|70	135	45	3	6|0|5|4|3|2|8|8|11|11|8|8|7|0|5|4	0.99	1	0.99	1	0.99	8	0
F508	SLC25A10	SLC25A10	95|55|35	185	61.67	3	6|6|2|3|5|5|8|2|3|9|1|3|0|2|3|1	1	1	1	1	1	16.72	0
F508	RHOT2	RHOT2	25|35|15	75	25	3	2|1|1|2|0|2|2|3|4|5|2|2|1|2|1|0	1	1	1	1	1	13.33	0
F508	RHOA	RHOA	60|80|30	170	56.67	3	3|2|1|2|0|2|5|2|5|3|2|5|5|6|1|1	1	1	1	1	1	20.15	0
F508	RAP2C	RAP2C	5|5|5	15	5	3	5|0|0|0|0|0|0|1|0|0|0|0|0|0|0|0	0.98	0.98	0.98	0.98	0.98	13.33	0
F508	GFPT1	GFPT1	65|40|45	150	50	3	5|5|5|5|6|5|4|12|12|14|7|11|4|7|7|10	1	1	1	1	1	6.72	0
F508	DNAJA3	DNAJA3	90|70|85	245	81.67	3	21|5|22|23|18|21|11|11|11|5|19|16|18|16|3|5	1	1	1	1	1	5.81	0
F508	C1orf226	C1orf226	40|35|10	85	28.33	3	0|0|0|0|0|0|0|0|0|0|0|0|0|0|0|0	1	1	1	1	1	283.33	0
F508	EPPK1	EPPK1	85|70|60	215	71.67	3	15|6|9|13|13|10|14|6|4|5|15|11|17|19|6|7	1	1	1	1	1	6.75	0
F508	NUP93	NUP93	130|125|50	305	101.67	3	23|5|7|6|16|9|9|14|9|9|18|14|12|15|16|17	1	1	1	1	1	8.17	0
F508	ISOC2	ISOC2	75|50|80	205	68.33	3	5|3|7|9|4|5|4|2|0|0|12|9|9|9|0|0	1	1	1	1	1	14.02	0
F508	ILF3	ILF3	135|115|95	345	115	3	32|5|34|17|33|27|43|48|20|21|34|41|36|38|12|20	0.81	1	0.81	1	0.81	3.99	0.01
F508	EHD4	EHD4	35|10|5	50	16.67	3	0|0|0|1|1|0|1|0|3|5|1|3|1|1|1|1	0.97	1	0.97	1	0.97	14.04	0
F508	NUP98	NUP98	35|40|55	130	43.33	3	7|0|5|5|5|3|4|2|4|4|7|10|11|16|5|2	1	1	1	1	1	7.7	0
F508	SLC25A11	SLC25A11	160|165|90	415	138.33	3	26|6|19|20|20|19|16|22|14|14|27|23|20|21|10|10	1	1	1	1	1	7.71	0
F508	ATP1A1	ATP1A1	220|195|145	560	186.67	3	34|12|18|13|8|7|16|14|11|17|11|12|14|12|15|19	1	1	1	1	1	12.82	0
F508	CAND1	CAND1	210|195|160	565	188.33	3	62|31|48|42|52|46|47|43|38|32|59|58|47|53|22|19	1	1	1	1	1	4.31	0
F508	RALY	RALY	25|15|25	65	21.67	3	1|0|0|0|0|0|1|0|1|1|0|2|3|3|0|1	1	1	1	1	1	26.67	0
F508	API5	API5	40|45|40	125	41.67	3	10|5|5|1|4|4|8|3|16|9|6|4|5|4|11|4	1	1	1	1	1	6.73	0
F508	PDCD6IP	PDCD6IP	115|115|100	330	110	3	36|17|26|30|27|26|13|17|14|15|36|24|29|29|12|11	1	1	1	1	1	4.86	0
F508	KIAA0090	KIAA0090	835|840|510	2185	728.33	3	16|5|1|2|4|4|6|5|5|10|0|5|0|5|4|4	1	1	1	1	1	153.33	0
F508	PHB2	PHB2	275|315|205	795	265	3	56|15|54|51|42|52|59|53|29|35|66|66|66|56|40|41	1	1	1	1	1	5.43	0
F508	AIFM1	AIFM1	70|60|40	170	56.67	3	3|0|0|0|0|0|1|2|6|5|2|2|1|1|10|5	1	1	1	1	1	23.86	0
F508	FKBP5	FKBP5	10|10|5	25	8.33	3	0|0|0|0|0|0|1|0|0|1|0|0|0|0|0|0	1	1	1	1	1	66.67	0
F508	HM13	HM13	75|65|65	205	68.33	3	11|0|3|1|3|3|3|1|0|3|8|8|5|5|3|4	1	1	1	1	1	17.92	0
F508	SFXN1	SFXN1	160|135|95	390	130	3	31|12|18|15|21|24|14|11|15|14|26|28|29|25|8|8	1	1	1	1	1	6.96	0
F508	NUP155	NUP155	40|30|40	110	36.67	3	16|5|10|4|13|9|7|7|7|7|6|8|5|7|9|10	1	1	1	1	1	4.51	0
F508	PSMC5	PSMC5	115|90|60	265	88.33	3	31|9|25|14|16|18|20|15|23|25|16|18|20|23|13|20	1	1	1	1	1	4.62	0
F508	ATP2A2	ATP2A2	280|285|180	745	248.33	3	65|29|40|33|24|22|47|43|38|44|44|49|50|54|18|18	1	1	1	1	1	6.43	0
F508	HLA-A	HLA-A	25|20|25	70	23.33	3	0|0|0|0|0|0|1|3|1|0|0|0|0|0|2|0	1	1	1	1	1	53.33	0
F508	HLA-C	HLA-C	5|15|15	35	11.67	3	0|0|0|0|0|0|0|0|0|0|0|0|0|0|0|0	1	1	1	1	1	116.67	0
F508	PYGL	PYGL	90|60|30	180	60	3	14|8|8|6|9|9|2|1|6|10|10|10|10|13|2|1	1	1	1	1	1	8.07	0
F508	PYGB	PYGB	35|35|20	90	30	3	6|3|3|1|2|2|2|1|6|2|1|4|4|4|2|2	1	1	1	1	1	10.67	0
F508	NOS1AP	NOS1AP	50|25|10	85	28.33	3	0|0|0|0|0|0|0|0|0|0|0|0|0|0|0|0	1	1	1	1	1	283.33	0
F508	LDHA	LDHA	80|85|30	195	65	3	21|9|8|6|9|8|6|4|6|7|8|7|15|10|5|4	1	1	1	1	1	7.82	0
F508	DHX40	DHX40	20|20|15	55	18.33	3	1|2|1|0|1|1|1|2|1|1|2|1|3|2|2|1	1	1	1	1	1	13.33	0
F508	DNAJC7	DNAJC7	50|60|30	140	46.67	3	0|0|0|1|0|0|2|4|6|6|1|0|2|2|2|6	1	1	1	1	1	23.33	0
F508	CNDP2	CNDP2	30|35|65	130	43.33	3	3|4|2|1|0|0|3|0|2|1|0|3|0|1|3|0	1	1	1	1	1	30.14	0
F508	LMNA	LMNA	55|25|80	160	53.33	3	11|0|3|6|2|3|1|2|0|0|2|4|3|4|1|0	1	1	1	1	1	20.32	0
F508	IDH3B	IDH3B	40|25|10	75	25	3	11|2|3|2|2|3|0|1|4|2|3|2|2|2|3|2	0.97	1	0.97	1	0.97	9.09	0
F508	ATAD3A	ATAD3A	160|130|85	375	125	3	16|0|7|12|7|6|9|6|5|6|13|15|13|12|7|6	1	1	1	1	1	14.29	0
F508	CHTOP	CHTOP	10|10|5	25	8.33	3	3|0|0|0|2|0|2|3|3|1|0|0|1|1|3|3	0.97	1	0.97	1	0.97	6.06	0
F508	CSE1L	CSE1L	245|180|150	575	191.67	3	54|20|48|38|39|25|26|26|38|26|32|38|30|33|24|29	1	1	1	1	1	5.83	0
F508	SULT1A1	SULT1A1	90|90|65	245	81.67	3	32|8|14|7|14|8|14|9|6|8|15|16|14|19|0|0	1	1	1	1	1	7.1	0
F508	VDAC2	VDAC2	120|160|155	435	145	3	32|6|35|38|37|37|23|27|45|44|39|37|37|36|28|30	1	1	1	1	1	4.37	0
F508	DNM2	DNM2	80|55|30	165	55	3	8|0|5|2|5|4|3|4|5|10|6|3|6|9|0|0	1	1	1	1	1	12.57	0
F508	TUBG1	TUBG1	75|50|40	165	55	3	17|2|11|8|9|9|11|11|12|14|13|15|8|14|3|4	1	1	1	1	1	5.47	0
F508	ACTG1	ACTG1	235|305|340	880	293.33	3	54|29|44|57|53|35|54|75|64|73|47|54|43|44|0|36	1	1	1	1	1	6.16	0
F508	ALDH7A1	ALDH7A1	15|30|10	55	18.33	3	2|0|0|0|1|0|4|2|1|0|1|0|0|0|2|3	1	1	1	1	1	18.33	0
F508	RPS10	RPS10	105|105|50	260	86.67	3	22|0|11|10|12|11|12|13|0|0|9|7|11|11|0|0	1	1	1	1	1	10.75	0
F508	SLC6A15	SLC6A15	25|30|10	65	21.67	3	1|0|1|0|1|1|2|6|10|7|0|0|0|0|3|2	0.98	1	0.98	1	0.98	10.2	0
F508	MTHFD1L	MTHFD1L	35|35|60	130	43.33	3	5|0|3|2|5|5|2|2|5|7|1|1|2|2|2|0	1	1	1	1	1	15.76	0
F508	RAB5C	RAB5C	100|105|80	285	95	3	9|4|8|5|8|5|9|11|5|11|8|8|8|8|7|5	1	1	1	1	1	12.77	0
F508	RAB5A	RAB5A	60|30|30	120	40	3	7|0|4|0|3|2|7|8|6|0|7|6|4|0|4|3	1	1	1	1	1	10.49	0
F508	RAB5B	RAB5B	15|15|10	40	13.33	3	2|2|0|2|2|1|0|0|0|0|1|2|2|3|0|0	1	1	1	1	1	12.55	0
F508	GLS	GLS	10|15|10	35	11.67	3	0|0|1|0|0|0|0|0|0|0|0|1|0|0|0|0	1	1	1	1	1	93.33	0
F508	ELAVL1	ELAVL1	90|70|80	240	80	3	16|0|11|9|10|15|18|18|10|18|16|14|15|18|14|7	1	1	1	1	1	6.12	0
F508	NOP2	NOP2	55|30|75	160	53.33	3	21|4|9|7|12|11|16|14|3|2|9|15|14|16|1|5	0.84	1	0.84	1	0.84	5.37	0.01
F508	PDCD6	PDCD6	35|60|30	125	41.67	3	16|0|7|8|11|9|4|7|2|1|9|10|12|8|1|4	1	1	1	1	1	6.12	0
F508	TOR1AIP1	TOR1AIP1	80|85|35	200	66.67	3	5|0|1|2|0|0|4|4|5|2|2|0|2|2|14|11	1	1	1	1	1	19.75	0
F508	MCM3	MCM3	165|185|130	480	160	3	24|15|22|17|11|10|20|21|16|15|12|13|17|24|13|10	1	1	1	1	1	9.85	0
F508	NSUN2	NSUN2	155|140|85	380	126.67	3	36|25|20|23|25|21|25|25|26|40|18|25|16|18|18|20	1	1	1	1	1	5.32	0
F508	LOC101060252	LOC101060252	35|35|40	110	36.67	3	8|0|8|7|6|6|7|6|4|6|11|10|10|10|1|1	1	1	1	1	1	5.81	0
F508	ACSL3	ACSL3	45|45|65	155	51.67	3	4|0|0|0|0|0|4|0|6|5|0|4|0|2|7|5	1	1	1	1	1	22.34	0
F508	ARF6	ARF6	45|30|25	100	33.33	3	6|3|5|5|6|3|3|6|7|5|3|6|2|4|3|5	1	1	1	1	1	7.41	0
F508	DEK	DEK	60|45|75	180	60	3	12|0|4|1|3|5|1|2|7|8|3|4|5|3|8|7	1	1	1	1	1	13.15	0
F508	DHFR	DHFR	30|40|35	105	35	3	3|2|7|8|8|8|6|6|8|12|9|9|10|7|0|2	1	1	1	1	1	5.33	0
F508	EIF4A1	EIF4A1	475|465|340	1280	426.67	3	78|21|70|59|68|53|70|47|63|62|110|87|83|95|68|62	1	1	1	1	1	6.23	0
F508	HSD17B4	HSD17B4	40|40|85	165	55	3	6|3|6|0|4|5|3|0|0|1|1|2|3|2|0|1	1	1	1	1	1	23.78	0
F508	SLC25A3	SLC25A3	210|165|140	515	171.67	3	22|12|15|12|16|6|19|24|16|14|17|20|15|16|5|6	1	1	1	1	1	11.69	0
F508	PRKACA	PRKACA	25|25|15	65	21.67	3	13|6|5|6|7|4|5|3|6|5|9|8|5|6|3|5	0.83	1	0.83	1	0.83	3.61	0.01
F508	PSMC2	PSMC2	70|95|45	210	70	3	10|7|17|16|20|17|15|15|21|24|22|20|23|20|6|16	0.77	1	0.77	1	0.77	4.16	0.01
F508	RAB2A	RAB2A	40|60|40	140	46.67	3	8|0|9|4|6|6|6|7|4|7|6|6|6|7|4|5	1	1	1	1	1	8.21	0
F508	RAP1B	RAP1B	15|15|5	35	11.67	3	5|3|4|2|1|3|0|0|0|0|4|5|0|5|0|1	0.83	1	0.83	1	0.83	5.66	0.01
F508	RPL18	RPL18	65|70|80	215	71.67	3	14|0|13|14|13|7|17|10|15|10|7|9|10|14|14|16	1	1	1	1	1	6.27	0
F508	RPL31	RPL31	100|65|60	225	75	3	9|1|6|10|11|10|12|12|12|6|11|11|11|13|9|9	1	1	1	1	1	7.84	0
F508	RPLP2	RPLP2	110|140|80	330	110	3	24|7|12|19|21|12|26|26|41|34|27|28|26|28|31|35	0.95	1	0.95	1	0.95	4.43	0
F508	RPLP1	RPLP1	105|125|110	340	113.33	3	10|9|8|8|8|10|11|7|8|5|9|8|13|9|11|11	1	1	1	1	1	12.51	0
F508	RPS13	RPS13	100|95|85	280	93.33	3	11|5|11|6|15|11|11|8|0|0|16|13|16|16|4|4	1	1	1	1	1	10.16	0
F508	RPS4X	RPS4X	155|160|190	505	168.33	3	25|18|28|30|24|27|32|31|39|38|52|51|51|43|26|26	1	1	1	1	1	4.98	0
F508	IQGAP1	IQGAP1	75|25|25	125	41.67	3	17|2|16|11|12|5|8|4|2|5|5|4|0|4|3|3	0.98	1	0.98	1	0.98	6.6	0
F508	UBE2N	UBE2N	40|45|25	110	36.67	3	6|0|5|3|5|3|3|6|2|2|3|4|4|4|2|1	1	1	1	1	1	11.07	0
F508	OAT	OAT	135|110|95	340	113.33	3	10|7|13|11|13|12|0|5|1|1|9|4|8|7|1|1	1	1	1	1	1	17.61	0
F508	GNL3	GNL3	145|125|110	380	126.67	3	37|13|21|24|29|20|36|48|29|33|32|34|37|43|17|25	1	1	1	1	1	4.24	0
F508	ATP5A1	ATP5A1	745|760|445	1950	650	3	133|44|110|90|109|83|103|82|93|93|161|151|145|139|92|85	1	1	1	1	1	6.07	0
F508	ATP6V1G1	ATP6V1G1	20|15|5	40	13.33	3	0|0|0|0|0|0|0|0|4|4|0|1|1|1|0|0	0.99	1	0.99	1	0.99	19.39	0
F508	CLTC	CLTC	150|125|85	360	120	3	33|17|45|33|36|34|14|18|6|4|25|25|39|27|4|6	0.97	1	0.97	1	0.97	5.25	0
F508	HSD17B10	HSD17B10	130|150|115	395	131.67	3	35|17|26|16|19|23|15|16|8|14|16|18|21|18|10|12	1	1	1	1	1	7.42	0
F508	EEF1E1	EEF1E1	40|45|30	115	38.33	3	5|4|5|9|9|10|13|8|7|3|0|4|8|4|2|1	1	1	1	1	1	6.67	0
F508	VAMP3	VAMP3	30|30|25	85	28.33	3	13|0|5|0|3|5|7|7|14|13|6|5|6|6|8|11	0.99	1	0.99	1	0.99	4.16	0
F508	VAPB	VAPB	30|40|25	95	31.67	3	9|4|2|3|5|4|5|9|7|9|6|5|3|4|11|11	1	1	1	1	1	5.22	0
F508	VAPA	VAPA	90|75|30	195	65	3	23|9|5|12|2|4|6|12|12|9|10|12|8|8|12|9	0.96	1	0.96	1	0.96	6.8	0
F508	ATP2B1	ATP2B1	35|35|40	110	36.67	3	9|3|0|0|3|6|0|2|3|5|0|0|6|5|1|0	1	1	1	1	1	13.64	0
F508	HIST1H1D	HIST1H1D	15|15|115	145	48.33	3	0|0|0|0|0|4|7|5|22|0|0|0|0|0|2|0	0.98	1	0.98	1	0.98	19.33	0
F508	LMNB1	LMNB1	280|235|215	730	243.33	3	30|11|13|13|14|8|25|26|16|14|21|24|23|26|5|5	1	1	1	1	1	14.21	0
F508	SLC1A5	SLC1A5	115|105|115	335	111.67	3	20|8|15|18|18|18|8|17|24|20|17|18|18|20|13|14	1	1	1	1	1	6.72	0
F508	ATP5C1	ATP5C1	140|140|115	395	131.67	3	36|16|21|21|15|14|19|16|28|33|24|25|28|24|15|18	1	1	1	1	1	5.97	0
F508	TXN	TXN	60|35|45	140	46.67	3	6|0|5|2|0|8|9|7|4|4|13|7|10|13|1|1	1	1	1	1	1	8.3	0
F508	DDX21	DDX21	285|320|285	890	296.67	3	88|30|68|55|67|65|62|51|66|52|84|77|78|76|33|59	1	1	1	1	1	4.7	0
F508	ATP5L	ATP5L	40|35|15	90	30	3	5|0|2|2|2|3|2|3|0|0|6|4|2|3|5|2	1	1	1	1	1	11.71	0
F508	MAT2A	MAT2A	100|80|45	225	75	3	6|0|10|7|8|6|3|5|2|2|4|5|5|9|0|0	1	1	1	1	1	16.67	0
F508	CCT2	CCT2	365|300|230	895	298.33	3	80|32|58|50|50|53|82|68|94|98|79|74|82|77|55|68	0.81	1	0.81	1	0.81	4.34	0.01
F508	CCT7	CCT7	200|160|155	515	171.67	3	49|29|42|39|33|38|49|47|42|43|45|44|43|38|30|32	1	1	1	1	1	4.27	0
F508	RBM14	RBM14	70|85|85	240	80	3	15|1|17|20|20|16|10|12|0|2|26|25|29|24|4|4	1	1	1	1	1	5.69	0
F508	UQCRB	UQCRB	20|15|40	75	25	3	0|0|0|0|0|0|0|0|0|0|0|0|0|0|0|0	1	1	1	1	1	250	0
F508	IGF2BP1	IGF2BP1	115|95|130	340	113.33	3	33|7|19|23|36|29|32|27|19|23|27|23|25|21|32|20	1	1	1	1	1	4.58	0
F508	KHDRBS1	KHDRBS1	85|70|70	225	75	3	36|17|24|30|27|29|19|21|14|17|30|30|29|27|13|14	0.9	1	0.9	1	0.9	3.18	0.01
F508	TCP1	TCP1	525|495|430	1450	483.33	3	106|55|97|88|82|93|94|94|130|139|124|122|120|117|86|92	1	1	1	1	1	4.72	0
F508	DSTN	DSTN	25|10|15	50	16.67	3	4|0|0|2|2|0|3|0|5|3|3|0|2|1|0|0	1	1	1	1	1	10.67	0
F508	YWHAQ	YWHAQ	60|40|30	130	43.33	3	9|9|11|13|5|8|8|7|9|8|8|10|8|9|0|1	1	1	1	1	1	5.64	0
F508	ERLIN2	ERLIN2	80|60|25	165	55	3	22|0|7|6|13|8|17|10|11|9|2|3|9|6|9|9	0.77	1	0.77	1	0.77	6.24	0.01
F508	VCP	VCP	495|490|305	1290	430	3	20|15|122|108|114|98|9|10|22|23|130|140|136|141|10|12	0.99	1	0.99	1	0.99	6.2	0
F508	KPNA6	KPNA6	20|20|25	65	21.67	3	0|0|4|0|8|5|8|2|3|11|0|7|0|9|14|9	0.97	0.99	0.97	0.99	0.97	4.33	0
F508	SEC61A1	SEC61A1	40|15|30	85	28.33	3	12|6|8|8|5|4|5|5|5|6|6|6|6|6|2|3	0.88	1	0.88	1	0.88	4.87	0.01
F508	DYNLRB1	DYNLRB1	15|15|20	50	16.67	3	0|0|0|0|0|0|0|5|0|8|0|2|0|0|0|0	1	1	1	1	1	17.78	0
F508	ARL8B	ARL8B	25|20|35	80	26.67	3	0|0|0|0|4|0|2|0|0|0|0|4|0|0|0|0	1	1	1	1	1	42.67	0
F508	RPL18A	RPL18A	40|30|40	110	36.67	3	6|0|0|3|6|10|0|0|3|3|15|14|9|11|0|3	1	1	1	1	1	7.07	0
F508	RPL28	RPL28	30|25|55	110	36.67	3	4|2|0|4|8|6|6|4|6|6|10|9|9|8|0|6	1	1	1	1	1	6.67	0
F508	TOMM34	TOMM34	15|10|5	30	10	3	3|0|1|1|3|1|3|1|3|2|0|0|0|1|3|6	0.9	1	0.9	1	0.9	5.71	0.01
F508	UBE2J1	UBE2J1	15|25|30	70	23.33	3	0|0|0|0|0|0|2|0|2|0|0|0|0|0|0|0	1	1	1	1	1	93.33	0
F508	SNRPD3	SNRPD3	35|25|30	90	30	3	7|6|4|6|8|6|7|7|6|6|9|7|7|9|0|1	1	1	1	1	1	5	0
F508	PWP2	PWP2	15|5|40	60	20	3	3|3|0|1|4|0|2|3|2|3|0|0|0|0|1|0	0.96	1	0.96	1	0.96	14.55	0
F508	ITPA	ITPA	30|25|5	60	20	3	4|0|0|0|3|1|1|0|1|3|0|2|1|0|0|0	0.98	1	0.98	1	0.98	20	0
F508	GSTK1	GSTK1	10|10|5	25	8.33	3	6|0|0|0|0|2|0|0|0|0|1|1|0|0|0|0	0.98	0.99	0.98	0.99	0.98	13.33	0
F508	SOAT1	SOAT1	10|5|5	20	6.67	3	0|0|0|0|0|0|0|0|0|0|0|0|0|0|0|0	1	1	1	1	1	66.67	0
F508	STK39	STK39	30|30|5	65	21.67	3	8|3|3|1|0|2|0|0|3|1|1|2|4|5|0|0	0.83	1	0.83	1	0.83	10.51	0.01
F508	BCCIP	BCCIP	15|35|10	60	20	3	4|0|0|1|4|4|4|2|0|0|2|2|5|5|7|5	0.98	1	0.98	1	0.98	7.11	0
F508	SRSF4	SRSF4	20|10|15	45	15	3	3|2|5|4|4|2|8|5|5|5|0|0|0|1|0|0	0.97	1	0.97	1	0.97	5.45	0
F508	RPL10	RPL10	70|65|30	165	55	3	6|1|5|5|6|5|12|6|8|13|15|18|17|16|13|14	0.88	1	0.88	1	0.88	5.5	0.01
F508	IDH3A	IDH3A	20|15|10	45	15	3	0|0|0|0|0|0|0|0|0|0|0|0|1|0|0|0	1	1	1	1	1	150	0
F508	SAR1B	SAR1B	45|45|25	115	38.33	3	3|0|0|0|0|0|0|0|0|0|0|0|0|0|0|0	1	1	1	1	1	204.44	0
F508	HAX1	HAX1	25|35|5	65	21.67	3	5|1|4|1|4|1|2|0|0|1|3|0|1|2|0|1	0.92	1	0.92	1	0.92	13.33	0
F508	NKRF	NKRF	10|20|15	45	15	3	6|3|8|8|3|1|0|2|1|5|5|2|7|5|0|0	0.88	1	0.88	1	0.88	4.29	0.01
F508	STX8	STX8	20|20|15	55	18.33	3	0|0|0|0|0|0|0|0|0|0|0|0|0|0|4|3	1	1	1	1	1	41.9	0
F508	BRI3BP	BRI3BP	25|5|15	45	15	3	0|0|0|0|0|0|0|0|0|0|0|0|0|3|0|0	1	1	1	1	1	80	0
F508	CBR1	CBR1	10|10|20	40	13.33	3	2|1|0|0|0|0|0|0|1|1|0|0|0|0|2|3	1	1	1	1	1	21.33	0
F508	MTHFD2	MTHFD2	10|15|10	35	11.67	3	1|0|0|1|0|0|0|0|0|0|0|0|0|0|0|0	1	1	1	1	1	93.33	0
F508	TEX264	TEX264	10|10|15	35	11.67	3	0|0|0|0|0|0|0|0|0|0|0|0|0|0|0|1	1	1	1	1	1	116.67	0
F508	TMEM97	TMEM97	20|10|10	40	13.33	3	4|0|0|2|4|0|0|1|2|1|2|2|3|3|3|5	1	1	1	1	1	6.67	0
F508	SRSF3	SRSF3	60|55|75	190	63.33	3	12|0|0|0|0|0|16|16|2|0|9|9|0|8|0|9	1	1	1	1	1	12.51	0
F508	RPS27L	RPS27L	40|45|30	115	38.33	3	2|0|1|1|1|0|2|7|0|1|3|2|2|10|10|0	1	1	1	1	1	14.6	0
F508	PPAN-P2RY11	PPAN-P2RY11	10|10|10	30	10	3	11|3|2|1|3|3|0|4|0|0|3|6|4|4|2|1	0.87	0.87	0.87	0.87	0.87	3.4	0.01
F508	PRDX4	PRDX4	30|25|40	95	31.67	3	0|0|0|0|0|0|0|0|0|0|0|0|0|0|0|0	1	1	1	1	1	316.67	0
F508	SRSF6	SRSF6	5|5|25	35	11.67	3	3|0|1|0|0|1|0|1|0|0|3|0|1|0|2|0	0.98	1	0.98	1	0.98	15.56	0
F508	QKI	QKI	10|15|5	30	10	3	0|0|0|0|0|0|2|1|3|4|0|0|0|0|5|0	0.97	1	0.97	1	0.97	10.67	0
F508	ACADVL	ACADVL	10|10|15	35	11.67	3	4|0|0|0|0|0|0|0|0|0|0|0|0|0|0|0	1	1	1	1	1	46.67	0
F508	PGLS	PGLS	10|15|5	30	10	3	0|0|0|0|0|0|2|0|0|0|0|0|1|0|0|0	1	1	1	1	1	53.33	0
F508	UBE2D3	UBE2D3	15|20|15	50	16.67	3	4|0|3|5|4|5|4|2|0|0|4|3|4|3|0|0	1	1	1	1	1	6.5	0
F508	SUPT5H	SUPT5H	10|10|15	35	11.67	3	2|0|4|2|0|0|2|1|5|6|5|4|4|8|8|4	0.81	0.99	0.81	0.99	0.81	3.39	0.01
F508	NPM3	NPM3	40|25|30	95	31.67	3	8|7|7|5|7|3|9|10|14|13|4|3|2|0|8|8	1	1	1	1	1	4.69	0
F508	SCAMP2	SCAMP2	15|5|15	35	11.67	3	1|0|0|0|0|0|0|0|0|0|0|0|0|0|0|0	1	1	1	1	1	116.67	0
F508	RER1	RER1	10|5|5	20	6.67	3	4|0|1|2|1|2|1|0|0|4|2|2|2|3|3|1	0.82	1	0.82	1	0.82	3.81	0.01
F508	DCTPP1	DCTPP1	10|20|35	65	21.67	3	2|0|0|0|1|1|3|3|1|2|1|1|3|2|0|0	1	1	1	1	1	17.33	0
F508	CCDC86	CCDC86	5|10|30	45	15	3	0|0|0|2|4|4|2|4|0|0|0|0|2|2|0|1	0.96	1	0.96	1	0.96	11.43	0
F508	HNRNPH3	HNRNPH3	25|30|95	150	50	3	4|2|3|0|3|5|4|7|5|4|4|2|3|2|0|3	1	1	1	1	1	15.69	0
F508	SDHA	SDHA	25|45|5	75	25	3	1|3|2|0|0|2|1|2|2|2|2|2|3|1|0|0	0.96	1	0.96	1	0.96	17.39	0
F508	PCYOX1	PCYOX1	5|15|5	25	8.33	3	0|0|0|0|0|0|0|0|0|0|0|0|0|0|0|0	1	1	1	1	1	83.33	0
F508	JAGN1	JAGN1	5|15|10	30	10	3	2|0|1|0|0|1|1|0|1|3|0|0|0|0|0|0	1	1	1	1	1	17.78	0
F508	TARS2	TARS2	5|20|20	45	15	3	4|0|0|0|0|0|0|0|0|3|0|0|0|0|0|0	0.99	1	0.99	1	0.99	34.29	0
F508	UBXN1	UBXN1	10|15|15	40	13.33	3	3|2|5|2|1|3|2|2|2|2|2|3|5|5|1|0	1	1	1	1	1	5.33	0
F508	MAGT1	MAGT1	20|30|25	75	25	3	3|4|0|0|0|3|0|3|2|1|0|0|0|0|1|1	1	1	1	1	1	22.22	0
F508	HMGA1	HMGA1	10|10|10	30	10	3	4|2|3|2|2|4|3|2|0|0|2|2|1|1|1|1	1	1	1	1	1	5.33	0
F508	ERAL1	ERAL1	5|15|20	40	13.33	3	0|0|0|0|0|0|0|0|0|0|0|0|0|1|0|0	1	1	1	1	1	133.33	0
F508	IDH2	IDH2	5|5|5	15	5	3	2|0|1|0|3|0|5|0|0|0|3|0|0|2|0|0	0.92	0.92	0.92	0.92	0.92	5	0
F508	ECI1	ECI1	15|15|10	40	13.33	3	5|1|0|0|0|0|0|0|0|0|0|0|0|0|0|0	1	1	1	1	1	35.56	0
F508	C21orf33	C21orf33	10|10|5	25	8.33	3	5|0|0|0|0|1|0|0|0|0|2|0|2|0|0|1	0.98	1	0.98	1	0.98	12.12	0
F508	ARHGDIA	ARHGDIA	15|10|35	60	20	3	3|0|1|0|0|0|2|2|2|2|1|1|1|1|2|4	1	1	1	1	1	14.55	0
F508	HSDL2	HSDL2	10|10|10	30	10	3	3|1|1|1|1|0|0|3|1|2|2|3|5|4|0|1	1	1	1	1	1	5.71	0
F508	CERS2	CERS2	5|10|5	20	6.67	3	3|0|1|1|1|1|0|0|0|0|0|2|1|1|1|3	0.99	1	0.99	1	0.99	7.11	0
F508	TRA2B	TRA2B	15|10|10	35	11.67	3	4|1|2|1|2|0|3|4|3|4|3|0|3|3|0|0	1	1	1	1	1	5.66	0
F508	GLRX5	GLRX5	5|10|5	20	6.67	3	0|0|0|0|0|0|0|0|0|0|0|0|0|0|0|0	1	1	1	1	1	66.67	0
F508	ATP6V1E1	ATP6V1E1	25|20|20	65	21.67	3	1|0|0|1|3|1|4|6|3|6|2|3|7|0|10|11	0.99	1	0.99	1	0.99	5.98	0
F508	NDUFA4	NDUFA4	15|5|25	45	15	3	1|0|3|3|2|2|1|1|1|0|0|0|1|1|0|0	0.99	1	0.99	1	0.99	15	0
F508	RPL19	RPL19	40|40|40	120	40	3	10|0|8|8|10|7|15|12|16|12|7|8|8|8|6|8	1	1	1	1	1	4.48	0
F508	RPL37A	RPL37A	50|40|60	150	50	3	6|3|4|6|2|2|6|4|1|3|3|5|4|5|0|0	1	1	1	1	1	14.81	0
F508	RPS28	RPS28	20|35|65	120	40	3	6|0|6|3|6|3|10|11|5|6|6|7|6|7|4|4	1	1	1	1	1	7.11	0
F508	CDC42	CDC42	100|80|25	205	68.33	3	15|13|4|4|4|11|10|14|4|6|6|4|5|7|0|0	0.99	1	0.99	1	0.99	10.22	0
F508	MGST3	MGST3	5|5|5	15	5	3	0|1|1|1|1|2|0|0|0|0|0|0|1|1|0|0	1	1	1	1	1	10	0
F508	H1F0	H1F0	10|10|5	25	8.33	3	1|0|0|0|0|0|1|2|0|0|1|1|3|2|0|0	1	1	1	1	1	12.12	0
F508	EIF1B	EIF1B	5|5|10	20	6.67	3	0|0|0|0|1|0|0|0|0|0|0|0|0|0|0|0	1	1	1	1	1	66.67	0
F508	RAD21	RAD21	5|15|20	40	13.33	3	2|1|1|2|2|1|3|3|4|3|1|4|0|0|0|2	0.9	1	0.9	1	0.9	7.36	0.01
F508	SPTLC1	SPTLC1	5|15|10	30	10	3	2|0|0|0|0|0|0|0|0|0|0|0|0|1|0|0	1	1	1	1	1	53.33	0
F508	SSR3	SSR3	45|30|60	135	45	3	7|3|4|4|2|2|1|0|6|7|2|3|3|5|0|3	1	1	1	1	1	13.85	0
F508	NOM1	NOM1	15|15|15	45	15	3	0|1|0|0|1|0|2|2|1|1|1|1|2|1|0|0	1	1	1	1	1	18.46	0
F508	HSPBP1	HSPBP1	15|15|25	55	18.33	3	0|0|1|0|1|0|0|0|0|0|1|1|1|0|1|1	1	1	1	1	1	41.9	0
F508	TMEM109	TMEM109	25|25|30	80	26.67	3	5|0|2|0|5|3|4|4|5|5|3|3|4|4|4|6	1	1	1	1	1	7.49	0
F508	RPL11	RPL11	30|45|60	135	45	3	10|0|9|14|12|9|10|10|11|8|16|17|18|16|11|7	0.8	1	0.8	1	0.8	4.04	0.01
F508	DHRS7B	DHRS7B	5|20|35	60	20	3	7|1|1|0|1|3|2|1|7|3|1|0|1|0|4|3	0.8	1	0.8	1	0.8	9.14	0.01
F508	PDK3	PDK3	15|10|5	30	10	3	4|0|2|1|0|0|0|2|0|0|0|0|0|0|0|0	0.99	1	0.99	1	0.99	17.78	0
F508	TMEM199	TMEM199	15|15|15	45	15	3	0|0|0|0|0|0|0|0|0|0|0|0|0|0|0|0	1	1	1	1	1	150	0
F508	RRP7A	RRP7A	10|15|25	50	16.67	3	4|1|1|1|1|0|0|0|2|0|1|2|0|1|3|0	1	1	1	1	1	15.69	0
F508	FAU	FAU	20|15|35	70	23.33	3	4|0|5|7|3|5|6|4|4|7|8|8|6|7|7|6	0.95	1	0.95	1	0.95	4.29	0
F508	HMGB1	HMGB1	5|10|5	20	6.67	3	5|1|0|0|0|0|4|2|2|3|0|0|0|0|5|6	0.79	0.97	0.79	0.97	0.79	3.81	0.01
F508	HMGB2	HMGB2	5|5|5	15	5	3	4|1|1|0|1|0|1|1|2|1|1|2|1|2|1|1	0.93	0.93	0.93	0.93	0.93	4	0
F508	TOE1	TOE1	10|10|5	25	8.33	3	1|0|0|0|0|0|2|3|0|0|0|0|0|0|0|1	1	1	1	1	1	19.05	0
F508	SLC6A8	SLC6A8	5|20|55	80	26.67	3	0|0|0|0|0|0|1|1|1|0|0|0|0|0|2|2	1	1	1	1	1	60.95	0
F508	FAR1	FAR1	5|10|35	50	16.67	3	0|0|1|0|0|0|1|1|1|3|2|4|0|2|2|3	0.97	1	0.97	1	0.97	13.33	0
F508	LCLAT1	LCLAT1	5|5|5	15	5	3	0|0|0|0|0|1|0|0|0|0|0|0|1|1|0|0	1	1	1	1	1	26.67	0
F508	DYNLT1	DYNLT1	5|15|5	25	8.33	3	3|0|0|1|0|0|3|5|2|1|3|2|2|4|0|0	0.85	1	0.85	1	0.85	5.13	0.01
F508	CDS2	CDS2	5|5|15	25	8.33	3	4|3|0|0|0|1|0|0|0|0|0|0|0|0|0|0	0.98	1	0.98	1	0.98	16.67	0
F508	CYTB	CYTB	5|15|5	25	8.33	3	1|1|0|0|0|0|0|0|0|0|0|0|0|0|0|0	1	1	1	1	1	66.67	0
F508	FAM49B	FAM49B	10|5|5	20	6.67	3	3|0|0|0|0|0|0|0|0|0|0|0|0|0|0|0	1	1	1	1	1	35.56	0
F508	UQCR11	UQCR11	10|5|10	25	8.33	3	0|0|0|0|0|0|0|0|0|0|0|0|0|0|0|0	1	1	1	1	1	83.33	0
F508	GNB4	GNB4	15|25|10	50	16.67	3	0|0|0|0|0|0|0|0|0|0|0|0|1|2|0|0	1	1	1	1	1	88.89	0
F508	SCD5	SCD5	10|10|15	35	11.67	3	0|0|0|0|0|0|0|0|0|0|0|0|0|0|0|0	1	1	1	1	1	116.67	0
F508	STIM1	STIM1	15|10|15	40	13.33	3	7|3|1|2|0|2|0|0|3|2|1|1|0|1|2|0	1	1	1	1	1	8.53	0
F508	LSM12	LSM12	15|25|40	80	26.67	3	3|0|6|5|2|5|6|6|9|5|6|11|10|10|6|5	0.8	1	0.8	1	0.8	4.49	0.01
F508	CYSTM1	CYSTM1	5|5|5	15	5	3	0|0|0|0|0|0|0|0|0|0|0|0|0|0|0|0	1	1	1	1	1	50	0
F508	ISOC1	ISOC1	5|15|30	50	16.67	3	5|1|2|0|1|1|0|0|2|1|0|0|1|2|0|0	0.98	1	0.98	1	0.98	16.67	0
F508	BCKDHA	BCKDHA	5|15|5	25	8.33	3	0|0|0|0|0|0|0|0|0|0|0|0|0|0|0|0	1	1	1	1	1	83.33	0
F508	TXNDC5	TXNDC5	5|20|5	30	10	3	3|2|0|1|3|2|3|1|0|0|3|2|2|1|1|2	0.87	1	0.87	1	0.87	6.15	0.01
F508	LOC100506562	LOC100506562	20|10|10	40	13.33	3	8|0|3|2|2|0|4|5|0|1|0|0|3|0|0|0	0.98	1	0.98	1	0.98	7.62	0
F508	DHCR24	DHCR24	10|10|5	25	8.33	3	0|0|1|2|1|2|0|0|0|0|1|0|0|0|0|0	1	1	1	1	1	19.05	0
F508	TBP	TBP	10|15|5	30	10	3	0|1|0|0|1|0|0|0|1|1|0|0|0|0|0|0	1	1	1	1	1	40	0
F508	EBP	EBP	15|15|25	55	18.33	3	0|0|0|2|0|0|0|0|0|0|2|0|0|0|0|0	1	1	1	1	1	73.33	0
F508	PFAS	PFAS	5|15|15	35	11.67	3	1|0|0|1|0|0|2|1|2|2|1|3|1|2|0|2	0.98	1	0.98	1	0.98	10.37	0
F508	FBXO7	FBXO7	5|5|10	20	6.67	3	1|1|1|2|2|2|2|0|2|3|0|0|0|0|0|0	0.98	1	0.98	1	0.98	6.67	0
F508	ARL5B	ARL5B	5|5|5	15	5	3	0|0|1|0|0|0|0|0|0|0|0|0|0|0|0|0	1	1	1	1	1	50	0
F508	FHL1	FHL1	15|10|15	40	13.33	3	4|1|0|0|0|3|7|7|3|1|0|1|0|0|11|8	0.93	0.97	0.93	0.97	0.93	4.64	0
F508	LAMC2	LAMC2	5|15|15	35	11.67	3	0|0|0|0|0|0|0|0|0|0|0|2|0|0|0|0	1	1	1	1	1	93.33	0
F508	PEG10	PEG10	10|5|20	35	11.67	3	0|0|0|0|0|0|1|2|3|2|0|0|0|0|0|0	0.99	1	0.99	1	0.99	23.33	0
F508	GSTM3	GSTM3	5|5|5	15	5	3	1|0|2|1|2|1|0|0|1|0|0|0|0|0|0|1	0.99	0.99	0.99	0.99	0.99	8.89	0
F508	TBRG4	TBRG4	5|10|5	20	6.67	3	2|1|0|1|1|0|1|0|1|1|0|0|0|1|0|1	0.99	1	0.99	1	0.99	10.67	0
F508	TMEM167A	TMEM167A	5|5|5	15	5	3	0|0|0|0|0|0|0|0|0|0|1|0|0|0|0|0	1	1	1	1	1	50	0
F508	DNAJC19	DNAJC19	5|10|15	30	10	3	1|1|0|0|0|0|0|0|0|0|0|0|0|0|0|0	1	1	1	1	1	80	0
F508	KIAA1715	KIAA1715	5|10|5	20	6.67	3	0|0|0|0|0|0|0|0|0|0|0|0|0|0|0|0	1	1	1	1	1	66.67	0
F508	RBM28	RBM28	10|20|40	70	23.33	3	4|0|0|1|1|0|1|2|1|1|2|3|3|4|0|1	1	1	1	1	1	15.56	0
F508	GBAS	GBAS	10|10|10	30	10	3	1|0|0|1|0|0|0|0|0|0|2|0|6|3|0|0	0.99	0.99	0.99	0.99	0.99	12.31	0
F508	CD63	CD63	5|5|5	15	5	3	0|0|0|0|0|0|0|0|0|0|0|0|0|0|0|0	1	1	1	1	1	50	0
F508	COX6C	COX6C	5|10|10	25	8.33	3	0|0|0|0|0|0|0|0|0|0|0|0|0|0|0|0	1	1	1	1	1	83.33	0
F508	C8orf55	C8orf55	10|15|35	60	20	3	0|0|1|2|3|1|0|0|0|0|4|3|2|4|0|1	1	1	1	1	1	15.24	0
F508	SLC1A3	SLC1A3	15|15|15	45	15	3	2|0|2|3|2|4|1|0|0|0|2|1|1|3|0|0	1	1	1	1	1	11.43	0
F508	HBA2	HBA2	5|10|5	20	6.67	3	0|0|0|0|0|0|0|0|0|0|0|0|0|0|0|0	1	1	1	1	1	66.67	0
F508	DDX56	DDX56	10|20|10	40	13.33	3	2|3|0|0|1|0|2|0|3|4|0|0|0|0|6|3	0.99	1	0.99	1	0.99	8.89	0
F508	NDUFV3	NDUFV3	10|5|10	25	8.33	3	1|0|0|0|0|0|0|0|0|0|0|0|0|0|0|0	1	1	1	1	1	83.33	0
F508	NUP188	NUP188	20|25|15	60	20	3	13|4|5|6|10|7|3|2|0|0|2|3|1|2|2|4	0.97	1	0.97	1	0.97	5	0
F508	SLC25A22	SLC25A22	5|10|5	20	6.67	3	0|0|0|0|0|0|0|0|0|1|0|0|0|0|0|0	1	1	1	1	1	66.67	0
F508	PDHA1	PDHA1	10|10|25	45	15	3	3|0|0|0|2|3|2|2|2|4|0|0|2|0|0|1	1	1	1	1	1	11.43	0
F508	SCARB2	SCARB2	5|15|15	35	11.67	3	2|0|0|0|0|0|0|0|0|0|0|0|0|0|0|0	1	1	1	1	1	93.33	0
F508	KCTD12	KCTD12	20|10|25	55	18.33	3	0|1|0|1|1|1|2|3|1|3|0|0|1|0|0|0	1	1	1	1	1	20.95	0
F508	PHF6	PHF6	10|10|15	35	11.67	3	2|0|0|0|0|0|0|0|2|0|0|0|0|1|2|0	1	1	1	1	1	26.67	0
F508	DNAJB12	DNAJB12	5|5|5	15	5	3	0|0|0|0|0|0|0|0|0|0|0|0|0|0|0|0	1	1	1	1	1	50	0
F508	FAM127B	FAM127B	5|10|30	45	15	3	0|0|0|0|0|0|0|0|0|0|0|0|0|0|0|0	1	1	1	1	1	150	0
F508	SLC25A21	SLC25A21	10|15|5	30	10	3	0|0|0|0|0|0|0|0|0|0|1|0|0|0|0|0	1	1	1	1	1	100	0
F508	MGST2	MGST2	5|5|10	20	6.67	3	0|0|0|0|0|0|0|0|0|0|0|0|0|0|0|0	1	1	1	1	1	66.67	0
F508	MLEC	MLEC	20|15|20	55	18.33	3	10|0|2|0|2|3|0|1|0|0|2|4|8|5|0|2	0.99	1	0.99	1	0.99	7.52	0
F508	LMAN2	LMAN2	10|10|15	35	11.67	3	0|0|0|0|0|0|0|0|0|0|0|0|0|0|0|0	1	1	1	1	1	116.67	0
F508	OPA1	OPA1	5|5|5	15	5	3	2|0|0|1|0|0|1|3|0|0|0|0|0|0|0|0	0.99	0.99	0.99	0.99	0.99	11.43	0
F508	NGDN	NGDN	5|5|5	15	5	3	1|0|0|1|0|1|0|0|0|1|0|0|1|0|0|0	1	1	1	1	1	16	0
F508	ZC3H18	ZC3H18	5|5|10	20	6.67	3	2|1|0|1|0|0|2|2|0|0|2|1|0|0|0|0	1	1	1	1	1	9.7	0
F508	SEC61G	SEC61G	45|50|40	135	45	3	10|6|6|7|2|10|3|4|0|0|3|3|5|5|0|0	1	1	1	1	1	11.25	0
F508	ZNF74	ZNF74	20|25|30	75	25	3	0|0|0|0|0|0|0|0|0|0|0|0|0|0|0|0	1	1	1	1	1	250	0
F508	HSPA14	HSPA14	5|10|10	25	8.33	3	2|0|2|0|2|3|6|8|0|1|1|0|0|2|2|1	0.85	0.97	0.85	0.97	0.85	4.44	0.01
MG132	EIF4G3	EIF4G3	25|28|21|28	102	25.5	4	0|0|0|0|0|0|0|0|0|0|0|0|0|0|0|0	1	1	1	1	1	255	0
MG132	GTF3C1	GTF3C1	18|21|21|18	78	19.5	4	4|0|5|0|0|1|5|7|7|4|2|4|0|4|4|6	1	1	1	1	1	5.89	0
MG132	INCENP	INCENP	18|18|18|18	72	18	4	0|0|0|0|0|0|0|0|0|0|0|0|0|0|0|0	1	1	1	1	1	180	0
MG132	ISOC1	ISOC1	21|14|21|25	81	20.25	4	5|1|2|0|1|1|0|0|2|1|0|0|1|2|0|0	1	1	1	1	1	20.25	0
MG132	PC	PC	5152|5128|5110|4963	20353	5088.25	4	1158|617|1543|1533|1393|1362|144|142|266|271|1730|1776|1667|1718|347|333	1	1	1	1	1	5.09	0
MG132	CANX	CANX	109|119|98|154	480	120	4	30|9|12|15|20|14|19|21|10|10|25|20|25|21|9|10	1	1	1	1	1	7.11	0
MG132	EIF3K	EIF3K	18|18|28|18	82	20.5	4	6|1|8|4|6|4|5|3|10|6|5|6|5|7|7|5	1	1	1	1	1	3.73	0
MG132	TRIP12	TRIP12	11|4|7|11	33	8.25	4	0|0|0|0|0|0|0|0|0|0|0|0|0|0|0|0	1	1	1	1	1	82.5	0
MG132	LARS	LARS	231|217|217|228	893	223.25	4	60|33|53|50|53|50|62|64|66|68|67|69|74|67|27|21	1	1	1	1	1	4.04	0
MG132	DCAF7	DCAF7	14|25|21|28	88	22	4	4|0|4|4|4|5|3|5|6|7|8|6|8|7|4|4	0.97	1	0.97	1	0.97	4.46	0
MG132	OTUB1	OTUB1	11|4|11|14	40	10	4	0|0|0|0|0|0|0|0|0|0|0|0|0|0|0|0	1	1	1	1	1	100	0
MG132	AARS	AARS	42|56|74|60	232	58	4	0|0|0|0|0|0|0|0|0|0|0|0|0|0|0|0	1	1	1	1	1	580	0
MG132	SMN2	SMN2	14|14|11|14	53	13.25	4	10|5|3|5|3|4|7|6|4|3|4|6|3|5|2|6	0.77	0.94	0.77	0.94	0.77	2.79	0.01
MG132	FAM98B	FAM98B	14|11|11|18	54	13.5	4	3|3|3|2|0|3|9|7|2|3|3|5|6|0|0|0	0.96	1	0.96	1	0.96	4.41	0
MG132	CAST	CAST	18|11|14|11	54	13.5	4	0|0|0|0|0|0|0|0|0|0|0|0|0|0|0|0	1	1	1	1	1	135	0
MG132	ACBD5	ACBD5	42|42|49|53	186	46.5	4	0|0|0|0|0|0|0|0|0|0|0|0|0|0|0|0	1	1	1	1	1	465	0
MG132	COASY	COASY	32|56|35|39	162	40.5	4	5|4|4|5|7|3|9|9|7|5|1|3|3|4|4|5	1	1	1	1	1	8.31	0
MG132	MGEA5	MGEA5	88|74|60|56	278	69.5	4	14|13|15|16|11|9|13|7|17|10|21|19|18|17|11|6	1	1	1	1	1	5.12	0
MG132	TIMM13	TIMM13	7|7|7|11	32	8	4	0|0|0|0|0|0|0|0|0|0|0|0|0|0|0|0	1	1	1	1	1	80	0
MG132	SMC2	SMC2	42|46|39|46	173	43.25	4	9|0|10|12|17|15|8|16|22|11|13|11|14|21|11|9	0.98	1	0.98	1	0.98	3.48	0
MG132	RPRD1B	RPRD1B	42|39|39|42	162	40.5	4	14|6|8|11|7|6|5|7|7|5|8|10|12|13|11|12	1	1	1	1	1	4.56	0
MG132	PPA1	PPA1	91|91|91|67	340	85	4	25|7|25|17|19|22|31|23|15|24|29|33|26|32|16|15	0.95	1	0.95	1	0.95	3.79	0
MG132	RRBP1	RRBP1	11|25|14|25	75	18.75	4	0|0|0|0|0|0|0|0|0|0|0|0|0|0|0|0	1	1	1	1	1	187.5	0
MG132	CDC5L	CDC5L	81|88|74|91	334	83.5	4	41|7|17|15|22|17|28|26|30|27|23|19|22|21|14|18	1	1	1	1	1	3.85	0
MG132	EEF1B2	EEF1B2	46|56|53|46	201	50.25	4	14|0|10|10|15|9|20|13|20|17|14|18|16|16|15|9	1	1	1	1	1	3.72	0
MG132	HSPBP1	HSPBP1	11|14|11|18	54	13.5	4	0|0|1|0|1|0|0|0|0|0|1|1|1|0|1|1	1	1	1	1	1	30.86	0
MG132	UBE2S	UBE2S	7|11|14|11	43	10.75	4	0|0|0|0|0|0|0|0|0|0|0|0|0|0|1|0	1	1	1	1	1	107.5	0
MG132	SIPA1L2	SIPA1L2	7|4|4|4	19	4.75	4	0|0|0|0|0|0|0|0|0|0|0|0|0|0|0|0	1	1	1	1	1	47.5	0
MG132	SUCLA2	SUCLA2	14|14|28|18	74	18.5	4	0|0|2|0|2|0|0|1|0|1|1|1|1|2|0|0	1	1	1	1	1	26.91	0
MG132	HMGB2	HMGB2	14|7|7|4	32	8	4	4|1|1|0|1|0|1|1|2|1|1|2|1|2|1|1	0.94	1	0.94	1	0.94	6.4	0
MG132	SPCS3	SPCS3	14|14|18|14	60	15	4	3|0|0|0|0|0|3|2|2|1|0|0|0|0|0|2	1	1	1	1	1	18.46	0
MG132	TPR	TPR	336|322|291|298	1247	311.75	4	52|17|91|77|87|72|68|64|66|83|79|77|66|64|68|69	1	1	1	1	1	4.53	0
MG132	RCC1	RCC1	14|21|25|18	78	19.5	4	6|0|0|3|4|2|15|12|5|3|6|6|4|2|5|2	0.9	0.99	0.9	0.99	0.9	4.16	0.01
MG132	UHRF1	UHRF1	25|32|25|28	110	27.5	4	3|0|4|3|5|3|21|19|7|6|3|3|2|5|3|3	0.98	0.99	0.98	0.99	0.98	4.89	0
MG132	MCCC2	MCCC2	2723|2457|2387|2244	9811	2452.75	4	306|110|407|394|388|378|96|100|143|137|641|658|596|549|97|99	1	1	1	1	1	7.7	0
MG132	SLC16A1	SLC16A1	32|35|35|28	130	32.5	4	8|3|7|12|5|6|2|4|4|6|12|10|12|8|3|5	1	1	1	1	1	4.86	0
MG132	COPG1	COPG1	39|39|25|32	135	33.75	4	23|4|5|4|3|3|4|4|5|7|7|10|25|8|2|4	0.94	0.99	0.94	0.99	0.94	4.58	0
MG132	MPDU1	MPDU1	18|25|11|21	75	18.75	4	4|0|0|0|2|0|0|1|1|0|4|3|4|1|4|0	1	1	1	1	1	12.5	0
MG132	DSG2	DSG2	32|46|28|42	148	37	4	16|6|10|11|13|10|0|0|9|10|10|8|7|9|12|13	0.98	1	0.98	1	0.98	4.11	0
MG132	MCCC1	MCCC1	3553|3539|3318|3238	13648	3412	4	570|170|1081|1061|781|729|95|88|132|122|1111|1150|990|1031|126|114	1	1	1	1	1	5.84	0
MG132	GARS	GARS	112|81|98|91	382	95.5	4	15|6|5|5|7|4|7|12|2|3|6|6|7|5|4|2	1	1	1	1	1	15.92	0
MG132	RER1	RER1	18|14|11|21	64	16	4	4|0|1|2|1|2|1|0|0|4|2|2|2|3|3|1	1	1	1	1	1	9.14	0
MG132	HDDC2	HDDC2	11|14|14|11	50	12.5	4	0|0|0|0|0|0|0|0|0|0|0|0|0|0|0|0	1	1	1	1	1	125	0
MG132	PTPLAD1	PTPLAD1	207|200|186|224	817	204.25	4	22|13|23|17|23|13|25|25|22|19|35|34|33|30|34|28	1	1	1	1	1	8.25	0
MG132	SLC38A1	SLC38A1	18|11|11|11	51	12.75	4	0|0|0|0|0|0|0|3|0|0|0|0|0|0|0|0	1	1	1	1	1	68	0
MG132	RG9MTD1	RG9MTD1	21|11|18|18	68	17	4	5|2|0|0|2|2|1|2|3|0|3|3|3|0|3|3	1	1	1	1	1	8.5	0
MG132	UTP18	UTP18	7|7|11|11	36	9	4	3|0|0|1|0|0|7|5|4|3|0|0|2|4|2|2	0.91	0.98	0.91	0.98	0.91	4.36	0
MG132	CDC20	CDC20	25|11|18|11	65	16.25	4	0|0|0|0|0|0|0|0|0|0|0|0|0|0|0|0	1	1	1	1	1	162.5	0
MG132	KTN1	KTN1	32|25|18|25	100	25	4	0|0|0|0|0|0|0|0|0|0|0|0|0|0|0|0	1	1	1	1	1	250	0
MG132	SRRM2	SRRM2	7|11|7|14	39	9.75	4	1|0|0|0|0|0|0|0|0|0|0|2|0|0|0|0	1	1	1	1	1	52	0
MG132	JMJD1C	JMJD1C	42|21|21|25	109	27.25	4	0|0|0|0|0|0|0|0|0|0|0|0|0|0|0|0	1	1	1	1	1	272.5	0
MG132	FNDC3A	FNDC3A	60|39|49|39	187	46.75	4	0|0|0|0|0|0|0|0|0|0|0|0|3|1|0|2	1	1	1	1	1	124.67	0
MG132	RPS18	RPS18	28|28|32|28	116	29	4	5|0|6|8|9|8|7|5|2|2|7|6|10|8|3|4	1	1	1	1	1	5.16	0
MG132	DHCR7	DHCR7	25|28|14|21	88	22	4	4|0|2|2|3|0|0|0|0|2|2|3|3|4|2|3	1	1	1	1	1	11.73	0
MG132	IGF2R	IGF2R	25|25|7|4	61	15.25	4	0|0|0|0|0|0|0|0|3|0|0|1|0|0|0|0	1	1	1	1	1	61	0
MG132	FBL	FBL	88|91|84|81	344	86	4	31|7|16|20|16|21|11|13|11|7|28|22|25|21|19|16	1	1	1	1	1	4.85	0
MG132	JUP	JUP	21|35|18|35	109	27.25	4	18|5|5|5|10|2|3|3|7|7|5|7|6|8|12|2	0.82	1	0.82	1	0.82	4.15	0.01
MG132	KIAA0368	KIAA0368	133|98|105|119	455	113.75	4	9|3|5|6|6|11|3|1|2|2|5|13|7|10|0|2	1	1	1	1	1	21.41	0
MG132	NNT	NNT	46|32|39|39	156	39	4	4|0|6|4|7|3|1|0|1|0|5|4|4|4|0|2	1	1	1	1	1	13.87	0
MG132	NUDCD3	NUDCD3	67|74|74|91	306	76.5	4	5|5|3|3|2|6|7|13|17|15|4|6|5|5|5|5	1	1	1	1	1	11.55	0
MG132	TPGS1	TPGS1	189|179|179|165	712	178	4	42|28|57|50|64|52|2|0|4|9|33|35|36|38|3|2	1	1	1	1	1	6.26	0
MG132	PFDN2	PFDN2	25|21|14|21	81	20.25	4	6|0|4|5|6|4|6|7|11|10|4|5|5|6|9|9	0.8	1	0.8	1	0.8	3.34	0.01
MG132	CRNKL1	CRNKL1	14|7|7|7	35	8.75	4	2|1|2|3|1|2|4|6|3|4|0|2|2|3|0|3	0.91	1	0.91	1	0.91	3.68	0
MG132	MYO1C	MYO1C	11|21|21|14	67	16.75	4	7|3|4|6|2|3|3|2|2|2|4|4|3|2|0|0	1	1	1	1	1	5.7	0
MG132	POR	POR	49|46|46|49	190	47.5	4	2|3|0|0|0|0|0|2|0|0|0|0|0|0|0|0	1	1	1	1	1	108.57	0
MG132	DDRGK1	DDRGK1	91|98|105|116	410	102.5	4	4|2|0|1|0|0|1|2|2|1|0|1|2|2|3|5	1	1	1	1	1	63.08	0
MG132	CNOT10	CNOT10	32|25|28|25	110	27.5	4	0|0|0|0|0|0|0|0|0|0|0|0|0|0|0|0	1	1	1	1	1	275	0
MG132	FSD1	FSD1	21|25|25|28	99	24.75	4	0|0|0|0|0|0|0|0|0|0|0|0|0|0|0|0	1	1	1	1	1	247.5	0
MG132	WDR11	WDR11	112|112|98|109	431	107.75	4	23|7|21|15|17|14|24|20|38|42|19|16|19|25|13|16	1	1	1	1	1	5.24	0
MG132	DHCR24	DHCR24	14|7|7|18	46	11.5	4	0|0|1|2|1|2|0|0|0|0|1|0|0|0|0|0	1	1	1	1	1	26.29	0
MG132	MCMBP	MCMBP	7|4|11|7	29	7.25	4	2|0|0|0|0|1|2|1|2|1|0|1|1|1|0|1	0.98	1	0.98	1	0.98	8.92	0
MG132	NUP85	NUP85	25|21|21|25	92	23	4	9|3|1|0|4|0|0|3|1|2|3|6|5|5|5|6	1	1	1	1	1	6.94	0
MG132	WDR61	WDR61	11|11|7|11	40	10	4	2|2|2|4|3|2|4|5|6|10|3|1|2|1|1|2	0.77	0.94	0.77	0.94	0.77	3.2	0.01
MG132	UBXN6	UBXN6	11|7|7|11	36	9	4	3|0|1|2|2|0|3|2|2|2|0|1|0|0|2|2	0.99	1	0.99	1	0.99	6.55	0
MG132	PRKCI	PRKCI	18|25|14|28	85	21.25	4	0|1|2|1|4|0|3|2|7|7|0|0|1|2|2|0	1	1	1	1	1	10.62	0
MG132	ABCC1	ABCC1	14|21|18|14	67	16.75	4	0|0|0|0|0|0|0|0|0|0|0|0|0|0|0|0	1	1	1	1	1	167.5	0
MG132	RABEP1	RABEP1	14|21|18|18	71	17.75	4	0|0|0|0|0|0|0|0|0|0|0|0|0|0|0|0	1	1	1	1	1	177.5	0
MG132	TMEM214	TMEM214	7|7|7|4	25	6.25	4	0|0|0|0|0|0|0|0|0|0|0|0|0|0|0|0	1	1	1	1	1	62.5	0
MG132	EIF2AK3	EIF2AK3	39|32|39|39	149	37.25	4	0|0|0|0|0|0|0|0|0|0|0|0|0|0|0|0	1	1	1	1	1	372.5	0
MG132	HAX1	HAX1	35|28|42|42	147	36.75	4	5|1|4|1|4|1|2|0|0|1|3|0|1|2|0|1	1	1	1	1	1	22.62	0
MG132	FBXO22	FBXO22	18|11|14|14	57	14.25	4	3|0|0|1|0|0|4|2|0|1|2|0|2|1|2|0	1	1	1	1	1	12.67	0
MG132	SLC25A21	SLC25A21	11|7|11|7	36	9	4	0|0|0|0|0|0|0|0|0|0|1|0|0|0|0|0	1	1	1	1	1	90	0
MG132	SERPINB1	SERPINB1	11|18|32|18	79	19.75	4	0|0|0|0|0|0|0|0|0|0|0|0|0|0|0|0	1	1	1	1	1	197.5	0
MG132	CLPB	CLPB	7|7|18|14	46	11.5	4	0|0|2|0|0|0|1|0|1|1|0|0|0|0|0|0	1	1	1	1	1	36.8	0
MG132	KIF11	KIF11	119|116|133|133	501	125.25	4	5|6|8|11|6|9|5|5|13|13|13|10|10|9|6|2	1	1	1	1	1	15.3	0
MG132	TMEM93	TMEM93	32|28|32|25	117	29.25	4	0|0|0|0|0|0|0|0|0|0|0|0|0|0|0|0	1	1	1	1	1	292.5	0
MG132	CDCA3	CDCA3	14|18|11|14	57	14.25	4	0|0|0|0|0|0|0|0|0|0|0|0|0|0|0|0	1	1	1	1	1	142.5	0
MG132	RPL28	RPL28	28|35|28|28	119	29.75	4	4|2|0|4|8|6|6|4|6|6|10|9|9|8|0|6	1	1	1	1	1	5.41	0
MG132	RPS5	RPS5	42|35|28|25	130	32.5	4	13|2|5|4|0|4|6|5|11|10|15|11|11|8|0|0	0.99	1	0.99	1	0.99	4.95	0
MG132	MARS	MARS	112|102|105|112	431	107.75	4	29|12|26|23|27|30|23|31|28|37|22|24|22|23|17|21	1	1	1	1	1	4.36	0
MG132	BAG3	BAG3	21|32|28|39	120	30	4	3|0|2|0|4|6|0|2|3|7|3|1|3|1|6|2	1	1	1	1	1	11.16	0
MG132	NBR1	NBR1	56|60|70|91	277	69.25	4	0|0|0|0|0|0|0|0|0|0|0|0|0|0|0|0	1	1	1	1	1	692.5	0
MG132	RPS9	RPS9	119|119|116|116	470	117.5	4	25|4|32|30|32|33|27|34|20|19|39|44|39|40|28|23	1	1	1	1	1	4.01	0
MG132	CLCN7	CLCN7	7|11|7|7	32	8	4	0|0|0|0|0|0|1|2|0|2|0|0|0|0|1|0	1	1	1	1	1	21.33	0
MG132	USP15	USP15	18|18|28|25	89	22.25	4	0|0|0|0|0|0|0|0|0|0|0|0|0|0|0|0	1	1	1	1	1	222.5	0
MG132	ESYT1	ESYT1	375|434|399|389	1597	399.25	4	54|32|26|34|23|20|31|29|47|39|36|29|41|41|42|42	1	1	1	1	1	11.29	0
MG132	C1orf43	C1orf43	35|49|39|39	162	40.5	4	0|0|0|0|0|0|0|0|0|0|0|0|0|0|0|0	1	1	1	1	1	405	0
MG132	TCHP	TCHP	14|21|18|18	71	17.75	4	0|0|0|0|0|0|0|0|0|0|0|0|0|0|0|0	1	1	1	1	1	177.5	0
MG132	NTPCR	NTPCR	46|32|42|32	152	38	4	16|5|6|3|7|8|4|6|1|4|2|0|3|2|0|0	1	1	1	1	1	9.07	0
MG132	RPS15A	RPS15A	182|154|151|140	627	156.75	4	18|4|12|19|22|15|30|22|20|16|49|47|37|35|14|17	1	1	1	1	1	6.65	0
MG132	RPS12	RPS12	46|42|42|39	169	42.25	4	12|9|9|6|9|10|16|17|25|25|12|12|11|6|0|5	0.95	0.99	0.95	0.99	0.95	3.67	0
MG132	CCNB1	CCNB1	21|25|35|28	109	27.25	4	0|0|0|0|0|0|0|0|0|0|0|0|0|0|0|0	1	1	1	1	1	272.5	0
MG132	CTBP2	CTBP2	21|25|21|14	81	20.25	4	12|4|6|6|5|7|5|3|6|8|9|5|5|6|5|5	0.8	1	0.8	1	0.8	3.34	0.01
MG132	POLR2E	POLR2E	18|25|14|18	75	18.75	4	5|2|3|3|3|3|6|8|6|6|5|4|4|2|4|4	1	1	1	1	1	4.41	0
MG132	POLR2H	POLR2H	14|7|7|14	42	10.5	4	2|2|0|2|3|0|4|4|4|3|3|3|4|3|3|4	0.79	1	0.79	1	0.79	3.82	0.01
MG132	SEC23B	SEC23B	56|42|49|49	196	49	4	11|0|6|4|7|5|4|5|13|9|0|1|0|0|5|5	1	1	1	1	1	10.45	0
MG132	POLR2C	POLR2C	18|11|18|14	61	15.25	4	3|1|2|3|4|2|1|3|3|5|2|2|1|2|4|4	1	1	1	1	1	5.81	0
MG132	TAF7	TAF7	60|70|70|67	267	66.75	4	0|0|0|0|0|0|0|0|0|0|0|0|0|0|0|0	1	1	1	1	1	667.5	0
MG132	CFL2	CFL2	46|42|49|39	176	44	4	9|5|8|3|10|9|0|0|10|8|0|0|0|0|0|0	1	1	1	1	1	11.35	0
MG132	WDR82	WDR82	18|11|18|7	54	13.5	4	0|0|0|0|0|0|0|0|0|0|0|0|0|0|0|0	1	1	1	1	1	135	0
MG132	GPR89A	GPR89A	42|39|49|46	176	44	4	4|3|3|1|0|0|3|1|2|5|1|2|0|1|0|0	1	1	1	1	1	27.08	0
MG132	HNRNPF	HNRNPF	116|119|119|109	463	115.75	4	41|30|42|38|31|35|41|41|46|47|21|17|19|24|22|27	1	1	1	1	1	3.55	0
MG132	DDB1	DDB1	25|32|32|25	114	28.5	4	3|2|0|6|3|0|9|4|8|4|4|2|4|1|5|7	1	1	1	1	1	7.35	0
MG132	COPA	COPA	91|105|112|95	403	100.75	4	23|8|20|17|22|17|20|18|13|15|16|17|18|18|12|11	1	1	1	1	1	6.08	0
MG132	CUEDC2	CUEDC2	11|18|21|21	71	17.75	4	0|0|0|0|0|0|0|0|0|0|0|0|0|0|0|0	1	1	1	1	1	177.5	0
MG132	DDX17	DDX17	231|207|249|217	904	226	4	71|15|43|52|50|54|76|85|61|71|81|74|72|67|60|59	0.83	1	0.83	1	0.83	3.65	0.01
MG132	CECR5	CECR5	32|35|53|35	155	38.75	4	4|1|1|2|0|4|1|1|0|0|3|1|3|2|1|0	1	1	1	1	1	25.83	0
MG132	CKAP2	CKAP2	11|14|14|18	57	14.25	4	5|3|2|0|4|2|9|7|6|9|1|2|1|0|3|5	0.91	0.99	0.91	0.99	0.91	3.86	0
MG132	ANKLE2	ANKLE2	53|67|46|60	226	56.5	4	2|0|1|1|0|1|0|3|8|10|1|1|3|2|2|0	1	1	1	1	1	25.83	0
MG132	ATP13A3	ATP13A3	11|11|11|11	44	11	4	0|0|0|0|0|0|0|0|0|0|0|0|0|0|0|0	1	1	1	1	1	110	0
MG132	RPS24	RPS24	98|95|109|109	411	102.75	4	32|9|21|27|25|28|25|28|33|28|46|44|38|40|14|12	0.97	1	0.97	1	0.97	3.65	0
MG132	AP2M1	AP2M1	25|32|18|25	100	25	4	9|2|9|6|11|10|7|5|7|7|7|12|10|9|5|6	0.8	1	0.8	1	0.8	3.28	0.01
MG132	HAUS5	HAUS5	28|18|25|11	82	20.5	4	0|0|0|0|0|0|0|0|0|0|0|0|0|0|0|0	1	1	1	1	1	205	0
MG132	SRP14	SRP14	39|53|32|39	163	40.75	4	6|4|2|3|5|4|11|7|5|9|7|6|8|5|6|7	1	1	1	1	1	6.86	0
MG132	ATP6AP2	ATP6AP2	74|60|81|88	303	75.75	4	0|0|0|0|0|0|0|0|0|0|0|0|0|0|0|0	1	1	1	1	1	757.5	0
MG132	RPS26	RPS26	53|39|39|49	180	45	4	13|8|12|10|13|10|9|9|11|11|12|15|13|8|5|7	1	1	1	1	1	4.34	0
MG132	ARHGEF2	ARHGEF2	32|28|42|35	137	34.25	4	9|2|0|0|9|6|5|4|1|2|2|8|5|6|0|0	1	1	1	1	1	9.29	0
MG132	PIGS	PIGS	7|14|14|14	49	12.25	4	4|2|0|0|0|0|0|0|0|0|0|0|0|0|0|0	1	1	1	1	1	32.67	0
MG132	IFT74	IFT74	21|25|28|25	99	24.75	4	0|0|0|0|0|0|0|0|0|0|0|0|0|0|0|0	1	1	1	1	1	247.5	0
MG132	PRPF40A	PRPF40A	42|39|46|35	162	40.5	4	15|8|9|8|9|10|16|18|13|18|8|15|13|9|14|13	1	1	1	1	1	3.31	0
MG132	HSP90AA1	HSP90AA1	424|392|455|406	1677	419.25	4	83|7|70|63|57|66|70|74|38|34|67|62|72|62|35|31	1	1	1	1	1	7.53	0
MG132	ITPR3	ITPR3	7|11|18|25	61	15.25	4	0|0|0|0|0|0|0|0|0|0|0|0|0|0|0|0	1	1	1	1	1	152.5	0
MG132	RPL11	RPL11	35|46|42|39	162	40.5	4	10|0|9|14|12|9|10|10|11|8|16|17|18|16|11|7	1	1	1	1	1	3.64	0
MG132	RPL7	RPL7	98|98|112|95	403	100.75	4	38|14|26|27|37|29|22|29|30|27|43|45|35|42|20|19	0.97	1	0.97	1	0.97	3.34	0
MG132	RPL9	RPL9	161|168|168|165	662	165.5	4	34|11|38|42|29|21|28|28|35|41|66|59|66|54|30|38	1	1	1	1	1	4.27	0
MG132	KIAA1244	KIAA1244	11|7|11|7	36	9	4	0|0|0|0|0|0|0|0|0|0|0|0|0|0|0|0	1	1	1	1	1	90	0
MG132	IMMT	IMMT	46|49|39|46	180	45	4	4|1|4|4|6|5|0|0|0|1|2|2|2|5|0|2	1	1	1	1	1	18.95	0
MG132	KHSRP	KHSRP	109|95|109|119	432	108	4	31|0|22|20|24|16|29|26|40|43|42|38|33|40|31|31	0.88	1	0.88	1	0.88	3.71	0.01
MG132	XPO7	XPO7	21|32|32|28	113	28.25	4	12|5|2|4|2|6|7|5|4|5|0|4|3|3|0|0	1	1	1	1	1	7.29	0
MG132	SPTAN1	SPTAN1	39|25|39|25	128	32	4	10|4|10|12|9|8|2|1|1|1|7|4|6|7|4|2	1	1	1	1	1	5.82	0
MG132	ERLIN1	ERLIN1	28|35|25|28	116	29	4	8|1|2|0|0|0|2|2|4|0|2|0|3|1|0|0	1	1	1	1	1	18.56	0
MG132	TRNT1	TRNT1	18|11|14|18	61	15.25	4	0|0|0|0|0|0|0|0|0|0|0|0|0|0|0|0	1	1	1	1	1	152.5	0
MG132	VEZT	VEZT	53|70|56|60	239	59.75	4	2|0|0|0|0|0|0|0|1|2|0|1|0|0|0|0	1	1	1	1	1	159.33	0
MG132	C19orf6	C19orf6	28|25|11|21	85	21.25	4	0|0|0|0|0|0|0|0|0|0|0|0|0|0|0|0	1	1	1	1	1	212.5	0
MG132	ZNF622	ZNF622	18|18|11|7	54	13.5	4	0|0|0|1|2|0|4|1|1|5|1|0|0|1|0|1	0.99	1	0.99	1	0.99	12.71	0
MG132	TRAP1	TRAP1	228|238|231|259	956	239	4	69|26|56|54|41|56|43|43|40|47|88|84|87|82|21|20	1	1	1	1	1	4.46	0
MG132	CCDC104	CCDC104	32|35|39|35	141	35.25	4	0|0|0|0|0|0|0|0|0|0|0|0|0|0|0|0	1	1	1	1	1	352.5	0
MG132	GAK	GAK	21|14|14|11	60	15	4	4|2|8|3|4|4|2|1|9|6|4|6|5|4|1|2	0.92	1	0.92	1	0.92	3.69	0
MG132	CCDC99	CCDC99	35|25|42|25	127	31.75	4	0|0|0|0|0|0|0|0|0|0|0|0|0|0|0|0	1	1	1	1	1	317.5	0
MG132	NPLOC4	NPLOC4	81|88|70|102	341	85.25	4	13|11|5|1|3|2|12|10|30|27|3|5|4|4|14|16	1	1	1	1	1	8.53	0
MG132	SNX19	SNX19	11|18|14|7	50	12.5	4	0|0|0|0|0|0|0|0|0|0|0|0|0|0|0|0	1	1	1	1	1	125	0
MG132	PSMD13	PSMD13	63|63|77|56	259	64.75	4	7|5|8|6|6|9|3|3|0|1|8|4|6|4|4|4	1	1	1	1	1	13.28	0
MG132	ACBD3	ACBD3	42|35|42|32	151	37.75	4	6|0|4|0|5|3|2|3|17|12|2|2|4|5|7|2	1	1	1	1	1	8.16	0
MG132	RPL36	RPL36	25|25|18|21	89	22.25	4	3|0|4|6|5|4|7|3|3|1|4|6|6|6|6|5	1	1	1	1	1	5.16	0
MG132	SPCS2	SPCS2	63|56|67|63	249	62.25	4	2|1|0|0|0|0|0|0|1|2|0|0|0|0|0|0	1	1	1	1	1	166	0
MG132	SARS	SARS	14|14|32|18	78	19.5	4	4|0|0|0|0|3|5|1|8|8|0|3|3|3|2|3	0.99	1	0.99	1	0.99	7.26	0
MG132	UQCRFS1	UQCRFS1	49|67|63|46	225	56.25	4	7|4|4|3|1|2|5|2|0|0|0|4|3|6|3|4	1	1	1	1	1	18.75	0
MG132	NACA	NACA	88|77|77|81	323	80.75	4	9|1|5|8|8|5|14|17|22|19|15|17|10|11|16|16	1	1	1	1	1	6.69	0
MG132	DDX54	DDX54	49|49|46|53	197	49.25	4	43|12|18|14|7|10|15|11|4|2|12|19|16|12|4|0	0.94	0.98	0.94	0.98	0.94	3.96	0
MG132	TRIM13	TRIM13	165|161|151|182	659	164.75	4	0|0|0|0|0|0|0|0|0|0|0|0|0|0|0|0	1	1	1	1	1	1647.5	0
MG132	SCAMP3	SCAMP3	18|25|18|18	79	19.75	4	3|0|3|1|2|3|0|0|0|3|0|3|3|3|4|4	1	1	1	1	1	9.88	0
MG132	FANCI	FANCI	49|67|53|56	225	56.25	4	17|5|3|7|7|6|9|7|10|7|6|6|4|8|0|5	1	1	1	1	1	8.41	0
MG132	DDX6	DDX6	102|81|88|84	355	88.75	4	29|6|28|19|24|19|23|33|44|37|23|26|20|25|19|26	0.99	1	0.99	1	0.99	3.54	0
MG132	WDR5	WDR5	18|14|11|18	61	15.25	4	0|0|0|0|0|0|4|5|1|0|0|0|0|0|0|0	1	1	1	1	1	24.4	0
MG132	PLD3	PLD3	11|7|11|11	40	10	4	1|0|0|0|0|0|0|0|0|0|0|0|0|0|0|0	1	1	1	1	1	100	0
MG132	GLMN	GLMN	14|18|11|21	64	16	4	7|0|3|4|0|0|0|0|5|7|0|1|1|3|0|0	0.99	1	0.99	1	0.99	8.26	0
MG132	RPLP0	RPLP0	102|67|88|77	334	83.5	4	24|5|11|13|19|18|29|23|29|21|22|20|23|20|18|21	1	1	1	1	1	4.23	0
MG132	ASS1	ASS1	112|105|119|133	469	117.25	4	7|1|2|0|5|3|16|12|38|32|11|14|16|9|0|0	1	1	1	1	1	11.3	0
MG132	SLC1A3	SLC1A3	11|7|7|11	36	9	4	2|0|2|3|2|4|1|0|0|0|2|1|1|3|0|0	0.99	1	0.99	1	0.99	6.86	0
MG132	MTR	MTR	182|147|172|179	680	170	4	0|0|0|0|0|0|0|0|0|0|0|0|0|0|0|0	1	1	1	1	1	1700	0
MG132	ATP13A1	ATP13A1	32|35|28|35	130	32.5	4	4|0|0|0|0|0|0|1|1|0|0|0|0|0|0|0	1	1	1	1	1	86.67	0
MG132	MMS19	MMS19	28|25|18|21	92	23	4	11|4|5|3|3|4|6|5|4|2|2|4|3|3|0|2	1	1	1	1	1	6.03	0
MG132	YIF1A	YIF1A	18|14|25|18	75	18.75	4	0|0|0|0|0|0|0|0|0|0|0|0|0|0|0|0	1	1	1	1	1	187.5	0
MG132	STX7	STX7	39|7|18|21	85	21.25	4	6|0|0|0|0|0|0|1|3|4|0|0|0|0|0|0	0.99	1	0.99	1	0.99	24.29	0
MG132	RPL23A	RPL23A	77|74|70|70	291	72.75	4	17|0|19|14|14|15|20|18|12|8|26|27|28|25|12|10	1	1	1	1	1	4.39	0
MG132	ATP6AP1	ATP6AP1	74|74|70|88	306	76.5	4	1|0|0|1|0|0|0|0|1|1|0|0|0|0|0|0	1	1	1	1	1	306	0
MG132	DNM1L	DNM1L	228|238|224|231	921	230.25	4	59|39|44|32|38|38|39|43|48|45|44|46|50|45|10|11	1	1	1	1	1	5.84	0
MG132	RPS6	RPS6	70|77|60|70	277	69.25	4	21|0|19|12|19|18|21|23|24|20|18|18|22|17|16|19	1	1	1	1	1	3.86	0
MG132	CCDC47	CCDC47	189|189|214|200	792	198	4	8|3|2|2|5|0|6|3|13|14|1|1|4|4|0|3	1	1	1	1	1	45.91	0
MG132	EXOSC6	EXOSC6	11|11|4|7	33	8.25	4	0|0|0|0|0|0|0|0|0|0|0|0|0|0|0|0	1	1	1	1	1	82.5	0
MG132	NCAPD2	NCAPD2	21|11|11|14	57	14.25	4	3|0|1|2|6|1|1|0|2|1|1|0|1|3|0|0	1	1	1	1	1	10.36	0
MG132	PIGU	PIGU	39|25|39|46	149	37.25	4	3|0|1|0|0|1|0|1|6|6|2|2|4|0|0|0	1	1	1	1	1	22.92	0
MG132	RPL21	RPL21	84|77|74|77	312	78	4	20|11|27|31|25|29|3|5|10|6|27|30|27|26|5|4	1	1	1	1	1	4.36	0
MG132	CAD	CAD	144|126|133|130	533	133.25	4	23|6|26|18|28|17|27|24|18|17|27|22|23|24|5|7	1	1	1	1	1	6.83	0
MG132	PARK7	PARK7	56|53|60|46	215	53.75	4	10|0|12|8|11|6|4|6|3|5|2|0|7|6|2|3	1	1	1	1	1	10.12	0
MG132	RPRD2	RPRD2	7|7|7|11	32	8	4	0|0|0|0|0|0|0|0|0|0|0|0|0|0|0|0	1	1	1	1	1	80	0
MG132	DDX39B	DDX39B	154|158|161|144	617	154.25	4	47|15|36|24|31|30|59|53|62|62|50|48|52|55|45|44	0.79	1	0.79	1	0.79	3.46	0.01
MG132	ZMPSTE24	ZMPSTE24	39|28|39|25	131	32.75	4	7|2|3|2|0|0|2|1|0|0|1|0|0|1|0|0	1	1	1	1	1	27.58	0
MG132	WRNIP1	WRNIP1	14|7|7|11	39	9.75	4	0|0|0|0|0|0|0|0|0|0|0|0|0|0|0|0	1	1	1	1	1	97.5	0
MG132	RACGAP1	RACGAP1	7|4|11|11	33	8.25	4	0|0|0|0|0|0|0|0|0|0|0|0|0|0|0|0	1	1	1	1	1	82.5	0
MG132	NDUFS7	NDUFS7	14|7|7|11	39	9.75	4	2|0|0|0|0|0|2|4|2|0|0|1|1|1|3|0	0.99	1	0.99	1	0.99	9.75	0
MG132	CSK	CSK	18|35|25|35	113	28.25	4	6|3|2|2|3|2|9|7|4|5|3|3|5|6|6|0	1	1	1	1	1	6.85	0
MG132	HMOX2	HMOX2	28|46|28|42	144	36	4	1|0|0|0|0|0|0|0|4|3|1|0|2|1|0|0	1	1	1	1	1	48	0
MG132	POLD2	POLD2	11|7|7|4	29	7.25	4	0|0|0|0|0|0|0|0|0|0|0|0|0|0|0|0	1	1	1	1	1	72.5	0
MG132	LRRC8A	LRRC8A	25|7|14|7	53	13.25	4	0|0|0|0|0|0|0|0|0|0|0|0|0|0|0|0	1	1	1	1	1	132.5	0
MG132	ALDH7A1	ALDH7A1	21|21|21|21	84	21	4	2|0|0|0|1|0|4|2|1|0|1|0|0|0|2|3	1	1	1	1	1	21	0
MG132	PPP1R15B	PPP1R15B	35|21|35|35	126	31.5	4	0|0|0|0|0|0|0|0|0|0|0|0|0|0|0|0	1	1	1	1	1	315	0
MG132	OPA1	OPA1	18|14|4|21	57	14.25	4	2|0|0|1|0|0|1|3|0|0|0|0|0|0|0|0	0.99	1	0.99	1	0.99	32.57	0
MG132	EXOSC7	EXOSC7	21|25|21|25	92	23	4	10|6|9|8|7|3|7|13|9|11|8|6|6|6|9|8	0.91	1	0.91	1	0.91	2.92	0
MG132	MFN2	MFN2	11|11|18|11	51	12.75	4	0|0|0|0|0|1|0|0|0|0|0|0|0|0|0|1	1	1	1	1	1	102	0
MG132	ETFA	ETFA	39|35|35|46	155	38.75	4	14|4|5|2|3|2|0|0|2|5|7|4|3|7|7|4	1	1	1	1	1	8.99	0
MG132	TFRC	TFRC	18|25|7|11	61	15.25	4	0|0|3|1|3|0|2|2|0|0|0|1|0|0|0|0	1	1	1	1	1	20.33	0
MG132	SACM1L	SACM1L	18|7|7|7	39	9.75	4	0|0|0|1|1|0|0|0|0|0|0|0|0|0|0|0	1	1	1	1	1	78	0
MG132	KIAA1524	KIAA1524	53|42|46|46	187	46.75	4	5|3|9|10|13|14|1|2|8|4|17|12|14|15|10|12	1	1	1	1	1	5.02	0
MG132	RAB11B	RAB11B	18|25|21|28	92	23	4	4|0|3|3|3|1|4|2|0|0|4|0|5|4|4|7	1	1	1	1	1	8.36	0
MG132	COX5A	COX5A	18|18|35|21	92	23	4	2|1|0|0|0|0|3|3|3|3|0|0|0|0|1|0	1	1	1	1	1	23	0
MG132	SRRT	SRRT	21|25|21|25	92	23	4	8|1|1|4|3|5|1|1|10|8|3|4|4|5|6|3	1	1	1	1	1	5.49	0
MG132	TOMM40	TOMM40	88|84|88|74	334	83.5	4	32|17|32|31|34|25|13|11|4|6|27|29|38|37|11|11	0.83	0.99	0.83	0.99	0.83	3.73	0.01
MG132	UBLCP1	UBLCP1	14|18|18|18	68	17	4	5|0|0|3|3|3|2|2|4|0|4|1|3|1|0|0	1	1	1	1	1	8.77	0
MG132	SKIV2L2	SKIV2L2	119|112|116|88	435	108.75	4	50|25|35|33|37|33|22|18|28|31|20|30|28|27|15|15	0.96	1	0.96	1	0.96	3.89	0
MG132	NSDHL	NSDHL	32|46|39|42	159	39.75	4	10|7|8|7|7|11|6|10|13|12|9|10|10|11|7|8	1	1	1	1	1	4.36	0
MG132	NIPSNAP1	NIPSNAP1	18|21|14|7	60	15	4	2|0|0|0|0|0|0|0|1|2|1|1|0|0|0|1	1	1	1	1	1	30	0
MG132	CYB5R3	CYB5R3	49|56|42|42	189	47.25	4	21|2|6|9|9|9|11|7|10|9|10|8|7|12|3|3	1	1	1	1	1	5.56	0
MG132	PRPSAP1	PRPSAP1	18|7|7|14	46	11.5	4	5|3|0|0|0|2|3|4|0|1|0|3|0|2|0|0	0.97	1	0.97	1	0.97	8	0
MG132	RFC5	RFC5	14|18|21|28	81	20.25	4	8|0|6|7|8|1|4|3|5|6|3|5|4|8|6|5	0.98	1	0.98	1	0.98	4.1	0
MG132	CUL2	CUL2	11|4|14|14	43	10.75	4	1|0|0|3|1|0|0|0|0|0|0|0|0|0|0|0	1	1	1	1	1	34.4	0
MG132	PSMC6	PSMC6	84|102|102|102	390	97.5	4	8|0|6|7|7|6|8|9|6|8|9|10|11|11|4|4	1	1	1	1	1	13.68	0
MG132	SURF4	SURF4	98|102|95|74	369	92.25	4	25|24|28|21|22|18|12|10|10|8|17|16|23|20|8|4	1	1	1	1	1	5.55	0
MG132	RTCD1	RTCD1	21|14|14|14	63	15.75	4	7|2|4|3|3|0|7|4|1|4|2|3|6|6|0|2	1	1	1	1	1	4.67	0
MG132	RTF1	RTF1	7|4|4|4	19	4.75	4	0|0|0|0|0|0|0|0|0|0|0|0|0|0|0|0	1	1	1	1	1	47.5	0
MG132	HYOU1	HYOU1	70|91|60|77	298	74.5	4	19|10|11|15|9|4|4|5|1|0|9|10|11|8|2|2	1	1	1	1	1	9.93	0
MG132	HMGCR	HMGCR	35|49|42|39	165	41.25	4	0|0|0|0|0|0|0|0|0|0|0|0|0|0|0|0	1	1	1	1	1	412.5	0
MG132	CPNE1	CPNE1	32|21|28|42	123	30.75	4	11|6|6|3|5|6|4|3|6|8|0|3|3|4|0|1	1	1	1	1	1	7.13	0
MG132	MB21D2	MB21D2	7|18|14|14	53	13.25	4	0|0|0|0|0|0|0|0|0|0|0|0|0|0|0|0	1	1	1	1	1	132.5	0
MG132	ITGB1	ITGB1	21|35|21|25	102	25.5	4	3|0|0|0|0|0|1|0|1|1|0|0|0|0|3|2	1	1	1	1	1	37.09	0
MG132	TBL3	TBL3	25|25|39|21	110	27.5	4	15|1|6|3|2|3|5|10|12|14|4|6|6|6|6|8	0.95	1	0.95	1	0.95	4.11	0
MG132	CKAP4	CKAP4	189|228|203|217	837	209.25	4	26|4|15|14|16|13|25|30|13|10|17|14|19|14|1|2	1	1	1	1	1	14.37	0
MG132	KPNB1	KPNB1	266|284|263|287	1100	275	4	65|44|58|64|57|51|81|83|48|50|74|71|72|70|38|41	1	1	1	1	1	4.55	0
MG132	ST13	ST13	53|39|42|46	180	45	4	2|0|0|0|0|0|4|6|3|2|0|0|0|3|3|2	1	1	1	1	1	28.8	0
MG132	CLMN	CLMN	39|32|39|21	131	32.75	4	4|0|4|3|6|3|5|2|12|6|15|13|16|16|7|5	0.85	1	0.85	1	0.85	4.48	0.01
MG132	EDC3	EDC3	21|25|14|14	74	18.5	4	7|3|0|3|4|1|4|3|4|2|2|3|2|1|6|7	1	1	1	1	1	5.69	0
MG132	HAUS1	HAUS1	11|7|11|7	36	9	4	0|0|0|0|0|0|0|0|0|0|0|0|0|0|0|0	1	1	1	1	1	90	0
MG132	RAD50	RAD50	25|18|32|28	103	25.75	4	13|12|10|13|10|8|3|0|0|3|7|3|8|9|0|0	0.87	1	0.87	1	0.87	4.16	0.01
MG132	P4HB	P4HB	18|14|4|11	47	11.75	4	2|0|1|3|1|2|1|1|0|0|2|4|2|4|0|0	0.92	1	0.92	1	0.92	8.17	0
MG132	BTF3	BTF3	130|102|116|133	481	120.25	4	16|9|7|5|5|5|20|11|27|32|9|8|12|13|15|14	1	1	1	1	1	9.25	0
MG132	DDOST	DDOST	98|119|81|88	386	96.5	4	23|7|11|9|10|8|13|11|9|12|18|16|22|19|7|5	1	1	1	1	1	7.72	0
MG132	NUMB	NUMB	7|11|7|11	36	9	4	0|0|0|0|0|0|0|0|0|0|0|0|0|0|0|0	1	1	1	1	1	90	0
MG132	HADHA	HADHA	60|74|98|77	309	77.25	4	15|3|1|4|3|2|5|7|2|1|1|0|3|4|1|2	1	1	1	1	1	22.89	0
MG132	HSP90AB1	HSP90AB1	469|462|452|459	1842	460.5	4	117|12|90|88|86|90|96|95|72|64|126|125|120|107|55|62	1	1	1	1	1	5.24	0
MG132	DHRS7B	DHRS7B	32|35|28|39	134	33.5	4	7|1|1|0|1|3|2|1|7|3|1|0|1|0|4|3	1	1	1	1	1	15.31	0
MG132	DHX30	DHX30	84|67|63|74	288	72	4	15|3|7|10|7|8|9|12|6|7|14|11|9|9|0|3	1	1	1	1	1	8.86	0
MG132	ATP6V1F	ATP6V1F	11|14|18|14	57	14.25	4	0|0|0|0|0|0|2|1|3|4|0|0|0|0|0|1	1	1	1	1	1	20.73	0
MG132	DNAJA3	DNAJA3	60|49|49|53	211	52.75	4	21|5|22|23|18|21|11|11|11|5|19|16|18|16|3|5	0.99	1	0.99	1	0.99	3.75	0
MG132	ATF6B	ATF6B	18|28|14|21	81	20.25	4	0|0|0|0|0|0|0|0|0|0|0|0|0|0|0|0	1	1	1	1	1	202.5	0
MG132	NOC3L	NOC3L	28|28|35|28	119	29.75	4	13|4|2|2|6|4|20|9|14|15|4|3|8|7|15|15	0.79	0.99	0.79	0.99	0.79	3.38	0.01
MG132	EIF2AK2	EIF2AK2	21|18|18|14	71	17.75	4	8|3|6|4|5|4|10|14|8|7|2|3|5|2|4|6	0.78	0.99	0.78	0.99	0.78	3.12	0.01
MG132	VDAC3	VDAC3	126|119|112|109	466	116.5	4	32|0|22|19|21|21|28|28|24|23|29|27|20|23|14|16	1	1	1	1	1	5.37	0
MG132	RPN2	RPN2	165|158|161|172	656	164	4	49|27|34|20|22|28|26|29|11|14|37|33|41|43|13|16	1	1	1	1	1	5.92	0
MG132	EPHX1	EPHX1	28|18|35|28	109	27.25	4	0|0|0|0|0|0|0|0|0|0|0|0|0|0|0|0	1	1	1	1	1	272.5	0
MG132	GRAMD1A	GRAMD1A	7|11|11|25	54	13.5	4	3|0|0|0|1|0|1|2|1|0|0|0|0|0|0|0	1	1	1	1	1	27	0
MG132	KANK2	KANK2	32|28|25|28	113	28.25	4	0|0|0|0|0|0|0|0|0|0|0|0|0|0|0|0	1	1	1	1	1	282.5	0
MG132	DDX39A	DDX39A	140|137|133|119	529	132.25	4	37|12|31|23|30|38|43|41|53|51|47|49|50|48|41|35	0.77	1	0.77	1	0.77	3.36	0.01
MG132	DIABLO	DIABLO	14|11|7|11	43	10.75	4	0|0|0|0|0|0|0|0|0|0|0|0|0|0|0|0	1	1	1	1	1	107.5	0
MG132	STIM1	STIM1	63|63|60|53	239	59.75	4	7|3|1|2|0|2|0|0|3|2|1|1|0|1|2|0	1	1	1	1	1	38.24	0
MG132	GATAD2B	GATAD2B	14|7|7|14	42	10.5	4	0|0|0|0|0|0|0|0|0|0|0|0|0|0|0|0	1	1	1	1	1	105	0
MG132	LANCL1	LANCL1	7|7|7|11	32	8	4	0|0|0|0|0|0|0|0|1|0|0|0|0|0|0|0	1	1	1	1	1	80	0
MG132	MCTS1	MCTS1	21|18|28|32	99	24.75	4	6|3|0|0|0|0|4|2|4|2|0|1|0|0|0|0	1	1	1	1	1	18	0
MG132	SMARCE1	SMARCE1	7|11|18|11	47	11.75	4	8|0|2|2|0|1|2|1|5|5|0|1|0|0|8|3	0.91	1	0.91	1	0.91	4.95	0.01
MG132	MRPL41	MRPL41	14|11|21|21	67	16.75	4	4|6|3|4|5|5|6|4|1|1|1|6|4|5|0|2	0.99	1	0.99	1	0.99	4.7	0
MG132	BCAP31	BCAP31	18|21|7|14	60	15	4	1|0|0|1|1|2|0|0|0|0|1|0|2|0|3|3	1	1	1	1	1	17.14	0
MG132	PLK1	PLK1	14|21|21|28	84	21	4	2|0|0|1|2|2|0|1|4|4|0|0|0|0|2|3	1	1	1	1	1	16	0
MG132	UCHL1	UCHL1	25|25|39|32	121	30.25	4	1|0|3|4|2|2|1|2|1|0|2|3|4|3|1|3	1	1	1	1	1	15.12	0
MG132	PSMC3	PSMC3	186|200|193|200	779	194.75	4	18|10|19|19|22|25|13|12|11|16|16|15|19|19|5|12	1	1	1	1	1	12.41	0
MG132	SF3A2	SF3A2	18|25|32|32	107	26.75	4	11|8|3|5|7|6|8|12|13|14|6|5|8|5|4|2	0.79	1	0.79	1	0.79	3.66	0.01
MG132	NOL11	NOL11	21|11|11|14	57	14.25	4	0|0|0|0|0|0|0|0|0|0|0|0|0|0|0|0	1	1	1	1	1	142.5	0
MG132	UBXN1	UBXN1	11|14|11|14	50	12.5	4	3|2|5|2|1|3|2|2|2|2|2|3|5|5|1|0	1	1	1	1	1	5	0
MG132	RNH1	RNH1	18|11|11|18	58	14.5	4	0|0|0|0|0|0|0|0|0|0|0|0|0|0|0|0	1	1	1	1	1	145	0
MG132	ATP5F1	ATP5F1	14|7|7|11	39	9.75	4	2|0|0|1|4|2|0|0|0|0|0|1|1|0|0|0	1	1	1	1	1	14.18	0
MG132	IPO9	IPO9	49|53|46|53	201	50.25	4	16|3|9|6|6|10|9|9|14|14|5|4|9|8|5|5	1	1	1	1	1	6.09	0
MG132	PARD3	PARD3	11|4|11|11	37	9.25	4	0|0|0|0|0|0|0|0|0|0|0|0|0|0|0|0	1	1	1	1	1	92.5	0
MG132	DNAJC1	DNAJC1	14|14|11|11	50	12.5	4	0|0|0|0|0|0|0|0|0|0|0|0|0|0|0|0	1	1	1	1	1	125	0
MG132	CCDC115	CCDC115	18|14|18|18	68	17	4	0|0|0|0|0|0|0|0|2|4|0|0|0|0|3|2	1	1	1	1	1	24.73	0
MG132	AGPAT9	AGPAT9	42|46|56|42	186	46.5	4	0|0|0|0|0|0|0|0|0|0|0|0|0|0|0|0	1	1	1	1	1	465	0
MG132	SLC25A1	SLC25A1	25|28|28|32	113	28.25	4	11|0|9|5|8|7|10|11|5|9|14|13|12|12|7|3	0.97	1	0.97	1	0.97	3.32	0
MG132	LONP1	LONP1	91|102|133|95	421	105.25	4	14|13|13|10|7|6|5|6|4|3|16|12|14|20|0|2	1	1	1	1	1	11.61	0
MG132	SKA1	SKA1	14|21|18|18	71	17.75	4	5|1|2|3|3|2|4|3|7|10|6|4|2|2|2|4	1	1	1	1	1	4.73	0
MG132	SPG20	SPG20	35|25|18|21	99	24.75	4	9|2|7|10|8|8|8|4|5|4|6|7|9|4|6|5	0.98	1	0.98	1	0.98	3.88	0
MG132	AKAP12	AKAP12	14|14|11|4	43	10.75	4	0|0|0|0|0|0|0|0|0|0|0|0|0|0|0|0	1	1	1	1	1	107.5	0
MG132	AIMP1	AIMP1	18|21|21|21	81	20.25	4	2|1|6|6|3|8|4|4|2|2|4|0|6|7|5|3	1	1	1	1	1	5.14	0
MG132	MAGT1	MAGT1	35|35|42|25	137	34.25	4	3|4|0|0|0|3|0|3|2|1|0|0|0|0|1|1	1	1	1	1	1	30.44	0
MG132	DNAJC11	DNAJC11	53|56|67|60	236	59	4	15|9|16|9|7|7|3|7|10|13|5|7|8|10|7|8	1	1	1	1	1	6.7	0
MG132	ATPAF2	ATPAF2	11|14|14|14	53	13.25	4	1|0|0|1|0|0|0|0|1|0|0|0|0|1|0|0	1	1	1	1	1	53	0
MG132	JPH1	JPH1	18|18|11|21	68	17	4	1|0|0|1|1|1|1|0|1|3|0|1|0|0|2|1	1	1	1	1	1	20.92	0
MG132	ANO6	ANO6	11|4|14|4	33	8.25	4	0|0|0|0|0|0|0|0|0|0|0|0|0|0|0|0	1	1	1	1	1	82.5	0
MG132	BRP44	BRP44	7|4|4|4	19	4.75	4	0|0|0|0|0|0|0|0|0|0|1|0|0|0|0|0	1	1	1	1	1	47.5	0
MG132	MTPN	MTPN	14|11|21|21	67	16.75	4	4|0|5|2|4|3|1|1|0|0|2|0|0|0|0|0	1	1	1	1	1	12.18	0
MG132	TMX2	TMX2	18|14|18|18	68	17	4	0|0|0|0|0|0|0|0|0|0|0|0|0|0|0|0	1	1	1	1	1	170	0
MG132	DNAJC7	DNAJC7	21|32|25|28	106	26.5	4	0|0|0|1|0|0|2|4|6|6|1|0|2|2|2|6	1	1	1	1	1	13.25	0
MG132	COPB1	COPB1	116|109|116|112	453	113.25	4	29|18|22|21|25|21|28|29|33|26|44|41|41|32|25|23	1	1	1	1	1	3.96	0
MG132	NDUFV2	NDUFV2	14|11|7|4	36	9	4	0|1|0|1|0|1|0|3|0|0|0|0|0|2|3|2	0.98	1	0.98	1	0.98	11.08	0
MG132	MTHFD1	MTHFD1	189|179|172|179	719	179.75	4	48|17|45|47|40|41|39|42|16|15|63|56|51|52|19|23	1	1	1	1	1	4.68	0
MG132	LSG1	LSG1	67|56|53|60	236	59	4	2|2|3|7|7|7|12|13|18|20|4|5|6|4|5|5	1	1	1	1	1	7.87	0
MG132	RELA	RELA	7|4|11|7	29	7.25	4	0|0|0|0|0|0|0|0|0|0|0|0|0|0|0|0	1	1	1	1	1	72.5	0
MG132	MTDH	MTDH	126|109|119|105	459	114.75	4	23|5|17|16|10|9|12|13|12|16|11|15|13|21|20|15	1	1	1	1	1	8.05	0
MG132	DEPDC1B	DEPDC1B	63|63|70|63	259	64.75	4	14|9|11|6|7|6|13|11|25|24|6|5|6|7|12|14	1	1	1	1	1	5.89	0
MG132	CCDC85C	CCDC85C	14|4|7|11	36	9	4	0|0|0|0|0|0|0|0|0|0|0|0|0|0|0|0	1	1	1	1	1	90	0
MG132	TTC28	TTC28	46|14|28|18	106	26.5	4	0|0|0|0|0|0|0|0|0|0|0|0|0|0|0|0	1	1	1	1	1	265	0
MG132	SNAP47	SNAP47	35|25|21|28	109	27.25	4	0|0|0|0|0|0|0|0|1|2|0|0|0|0|0|1	1	1	1	1	1	109	0
MG132	TXNDC5	TXNDC5	14|18|14|28	74	18.5	4	3|2|0|1|3|2|3|1|0|0|3|2|2|1|1|2	1	1	1	1	1	11.38	0
MG132	TMEM33	TMEM33	25|32|32|28	117	29.25	4	6|0|7|4|6|8|2|1|1|0|5|4|6|6|6|3	1	1	1	1	1	7.2	0
MG132	RAI14	RAI14	46|39|25|49	159	39.75	4	0|0|0|0|0|0|0|0|0|0|0|0|0|0|0|0	1	1	1	1	1	397.5	0
MG132	PSMB3	PSMB3	49|63|74|53	239	59.75	4	0|0|0|0|0|0|0|0|0|0|0|0|0|0|0|0	1	1	1	1	1	597.5	0
MG132	PSMB4	PSMB4	98|98|81|81	358	89.5	4	0|0|0|0|0|0|0|0|0|0|0|0|0|0|0|0	1	1	1	1	1	895	0
MG132	MRPL37	MRPL37	7|7|7|7	28	7	4	0|0|1|1|1|2|2|0|0|0|0|1|0|1|1|0	1	1	1	1	1	11.2	0
MG132	RPS20	RPS20	39|42|42|49	172	43	4	10|0|12|12|9|12|8|7|12|11|11|12|9|10|14|14	1	1	1	1	1	4.22	0
MG132	CHMP7	CHMP7	21|18|18|11	68	17	4	1|0|0|0|1|0|0|0|6|6|0|0|1|0|4|1	1	1	1	1	1	13.6	0
MG132	TMEM199	TMEM199	32|32|35|32	131	32.75	4	0|0|0|0|0|0|0|0|0|0|0|0|0|0|0|0	1	1	1	1	1	327.5	0
MG132	STT3A	STT3A	32|39|39|35	145	36.25	4	11|6|13|5|11|14|9|8|5|5|6|8|11|10|6|13	1	1	1	1	1	4.11	0
MG132	PSMA3	PSMA3	39|28|32|28	127	31.75	4	0|0|0|0|0|0|0|0|0|0|0|0|0|0|0|0	1	1	1	1	1	317.5	0
MG132	PSMA6	PSMA6	18|25|18|32	93	23.25	4	0|0|0|0|0|0|0|0|0|0|0|0|0|0|0|0	1	1	1	1	1	232.5	0
MG132	SNX2	SNX2	42|39|39|32	152	38	4	10|0|10|6|11|6|12|11|23|20|7|10|15|9|17|11	0.83	1	0.83	1	0.83	3.42	0.01
MG132	PHGDH	PHGDH	133|161|182|179	655	163.75	4	45|25|32|31|35|29|31|37|24|27|50|49|42|39|3|6	1	1	1	1	1	5.19	0
MG132	SRPR	SRPR	81|84|91|88	344	86	4	9|5|6|7|5|6|11|10|12|9|7|10|4|7|3|2	1	1	1	1	1	12.18	0
MG132	TTK	TTK	21|35|25|25	106	26.5	4	2|0|3|0|3|1|3|4|8|14|4|4|3|3|4|0	1	1	1	1	1	7.57	0
MG132	UBA1	UBA1	81|77|119|95	372	93	4	26|13|12|14|18|14|29|31|39|43|13|11|18|18|25|33	0.97	1	0.97	1	0.97	4.17	0
MG132	MCM5	MCM5	53|63|56|56	228	57	4	18|1|13|18|13|3|18|18|8|12|9|11|12|18|15|16	1	1	1	1	1	4.49	0
MG132	GRWD1	GRWD1	21|35|42|35	133	33.25	4	7|7|9|8|11|8|6|4|6|6|11|11|10|17|8|7	0.89	1	0.89	1	0.89	3.91	0.01
MG132	MRI1	MRI1	11|14|11|21	57	14.25	4	1|0|1|1|3|1|0|1|0|1|0|1|2|2|0|0	1	1	1	1	1	16.29	0
MG132	TNIK	TNIK	11|11|4|11	37	9.25	4	0|0|0|0|0|0|0|0|0|0|0|0|0|0|0|0	1	1	1	1	1	92.5	0
MG132	AHCY	AHCY	28|32|42|42	144	36	4	6|4|5|3|5|5|4|4|7|9|1|2|3|4|5|4	1	1	1	1	1	8.11	0
MG132	UXT	UXT	18|7|11|14	50	12.5	4	0|0|0|0|0|0|0|0|0|0|0|0|0|0|0|0	1	1	1	1	1	125	0
MG132	USP11	USP11	42|39|32|28	141	35.25	4	3|0|0|1|0|0|4|3|2|3|0|2|0|0|0|0	1	1	1	1	1	31.33	0
MG132	HSPA9	HSPA9	364|392|392|396	1544	386	4	75|28|110|96|119|120|79|76|97|97|110|103|107|108|58|60	1	1	1	1	1	4.28	0
MG132	CCT5	CCT5	193|182|182|196	753	188.25	4	76|57|57|58|56|48|60|74|77|72|67|56|61|64|51|58	1	1	1	1	1	3.04	0
MG132	UBXN4	UBXN4	105|109|91|77	382	95.5	4	4|2|3|2|1|2|0|0|5|5|2|3|2|5|3|4	1	1	1	1	1	35.53	0
MG132	UFL1	UFL1	39|21|14|11	85	21.25	4	7|4|1|0|2|3|5|3|8|7|1|0|2|2|6|6	0.95	1	0.95	1	0.95	5.96	0
MG132	KIAA1279	KIAA1279	14|7|21|28	70	17.5	4	3|0|2|0|4|3|5|5|5|5|1|4|3|2|0|0	0.91	1	0.91	1	0.91	6.67	0
MG132	C20orf3	C20orf3	11|18|7|18	54	13.5	4	3|2|0|1|1|0|0|0|0|0|0|2|0|0|0|0	1	1	1	1	1	24	0
MG132	LRRC47	LRRC47	32|39|32|25	128	32	4	4|0|0|2|0|1|1|2|4|6|0|0|0|2|0|1	1	1	1	1	1	22.26	0
MG132	FAR1	FAR1	14|11|11|7	43	10.75	4	0|0|1|0|0|0|1|1|1|3|2|4|0|2|2|3	1	1	1	1	1	8.6	0
MG132	WDR92	WDR92	18|14|14|14	60	15	4	0|0|0|0|0|0|0|0|0|0|0|0|0|0|0|0	1	1	1	1	1	150	0
MG132	PSMC1	PSMC1	151|130|123|147	551	137.75	4	14|3|12|9|14|15|11|8|7|8|20|13|16|15|3|4	1	1	1	1	1	12.81	0
MG132	KIAA1967	KIAA1967	53|67|63|56	239	59.75	4	16|7|9|9|6|3|12|16|17|17|11|9|13|11|19|20	1	1	1	1	1	4.9	0
MG132	TECR	TECR	32|35|28|32	127	31.75	4	5|1|6|9|6|7|5|3|1|1|8|8|10|10|6|6	1	1	1	1	1	5.52	0
MG132	NUP62	NUP62	70|56|67|63	256	64	4	17|10|22|24|20|12|12|11|14|17|22|23|20|23|9|2	1	1	1	1	1	3.97	0
MG132	FAF2	FAF2	67|77|88|81	313	78.25	4	2|2|1|1|1|0|0|2|0|0|4|3|3|3|0|0	1	1	1	1	1	56.91	0
MG132	COX2	COX2	35|53|32|39	159	39.75	4	18|6|7|4|11|9|3|5|10|6|2|7|8|6|4|9	1	1	1	1	1	5.53	0
MG132	GTSE1	GTSE1	7|11|14|7	39	9.75	4	0|0|0|0|0|0|0|0|0|0|0|0|0|0|0|0	1	1	1	1	1	97.5	0
MG132	COPS7A	COPS7A	7|4|4|7	22	5.5	4	0|0|0|0|0|0|0|0|0|0|0|0|0|0|0|0	1	1	1	1	1	55	0
MG132	DDX20	DDX20	7|7|4|4	22	5.5	4	1|0|1|0|1|0|3|6|1|0|2|2|1|0|0|0	0.9	0.97	0.9	0.97	0.9	4.89	0.01
MG132	EIF4ENIF1	EIF4ENIF1	14|18|7|11	50	12.5	4	0|0|0|0|0|0|0|0|0|0|0|0|0|0|0|0	1	1	1	1	1	125	0
MG132	PSMD1	PSMD1	245|238|249|221	953	238.25	4	13|6|25|27|23|22|4|6|7|3|30|33|34|40|8|4	1	1	1	1	1	13.38	0
MG132	PSMD2	PSMD2	210|214|203|200	827	206.75	4	20|7|37|36|36|32|11|17|7|12|30|31|36|33|11|15	1	1	1	1	1	8.92	0
MG132	PSMD3	PSMD3	102|102|88|91	383	95.75	4	30|9|23|19|21|22|29|26|23|31|36|31|35|29|17|14	1	1	1	1	1	3.88	0
MG132	PSMD7	PSMD7	28|35|21|18	102	25.5	4	0|0|2|0|0|0|0|0|0|0|3|2|3|2|0|1	1	1	1	1	1	31.38	0
MG132	ALDH1B1	ALDH1B1	28|39|35|35	137	34.25	4	5|3|5|3|3|2|1|2|2|2|3|1|1|4|0|1	1	1	1	1	1	14.42	0
MG132	ALDH2	ALDH2	11|14|4|7	36	9	4	0|0|1|0|0|0|0|0|0|0|0|0|0|0|0|0	1	1	1	1	1	90	0
MG132	RRM2	RRM2	109|98|84|105	396	99	4	11|6|2|3|7|5|22|16|40|39|4|4|3|3|12|16	1	1	1	1	1	8.21	0
MG132	NUP133	NUP133	119|112|98|98	427	106.75	4	18|9|11|8|8|6|16|15|18|15|16|17|19|16|18|22	1	1	1	1	1	7.36	0
MG132	NUP54	NUP54	11|11|14|7	43	10.75	4	3|0|5|3|4|4|0|2|1|2|1|0|4|2|3|1	0.98	1	0.98	1	0.98	4.91	0
MG132	NDUFS2	NDUFS2	28|32|25|21	106	26.5	4	2|0|1|0|1|0|3|2|1|1|4|2|4|3|2|2	1	1	1	1	1	15.14	0
MG132	AHCTF1	AHCTF1	11|7|4|7	29	7.25	4	0|0|0|0|0|0|0|0|0|0|0|0|0|0|0|0	1	1	1	1	1	72.5	0
MG132	LPP	LPP	14|18|11|11	54	13.5	4	0|0|0|0|0|0|0|0|0|0|0|0|0|0|0|0	1	1	1	1	1	135	0
MG132	PFKM	PFKM	21|18|28|28	95	23.75	4	4|0|5|6|5|6|6|6|6|7|5|10|5|6|4|4	1	1	1	1	1	4.47	0
MG132	CNDP2	CNDP2	18|11|11|11	51	12.75	4	3|4|2|1|0|0|3|0|2|1|0|3|0|1|3|0	1	1	1	1	1	8.87	0
MG132	TMEM48	TMEM48	35|53|28|56	172	43	4	1|1|0|0|0|0|1|0|0|1|1|0|3|5|0|0	1	1	1	1	1	52.92	0
MG132	AP2A2	AP2A2	35|32|32|42	141	35.25	4	11|5|4|5|6|6|0|6|14|10|7|3|0|3|7|11	1	1	1	1	1	5.76	0
MG132	SREBF2	SREBF2	7|4|4|7	22	5.5	4	0|0|0|0|0|0|0|0|0|0|0|0|0|0|0|0	1	1	1	1	1	55	0
MG132	C15orf63	C15orf63	14|21|14|21	70	17.5	4	3|0|0|0|0|0|6|2|8|8|2|2|2|3|2|2	0.99	1	0.99	1	0.99	7	0
MG132	MMGT1	MMGT1	18|11|14|21	64	16	4	0|0|0|0|0|0|0|0|0|0|0|0|0|0|0|0	1	1	1	1	1	160	0
MG132	SLC9A1	SLC9A1	39|56|46|46	187	46.75	4	0|0|0|0|0|0|0|0|0|0|0|0|0|0|0|0	1	1	1	1	1	467.5	0
MG132	FUS	FUS	70|77|77|67	291	72.75	4	23|9|19|12|13|10|30|25|26|19|30|30|28|23|8|9	0.99	1	0.99	1	0.99	3.71	0
MG132	SBDS	SBDS	14|14|11|7	46	11.5	4	0|0|0|0|0|0|0|0|0|0|0|0|0|0|0|0	1	1	1	1	1	115	0
MG132	SRPRB	SRPRB	56|60|53|60	229	57.25	4	4|0|1|1|3|1|4|7|7|8|5|5|5|7|6|3	1	1	1	1	1	13.67	0
MG132	GPD2	GPD2	18|18|7|18	61	15.25	4	3|4|0|2|1|1|0|0|0|0|0|0|0|0|0|0	1	1	1	1	1	22.18	0
MG132	PSMD11	PSMD11	67|56|63|56	242	60.5	4	10|5|9|7|8|5|4|6|9|9|4|6|7|7|12|14	1	1	1	1	1	7.93	0
MG132	CDK5RAP3	CDK5RAP3	18|18|25|39	100	25	4	7|5|5|6|1|1|2|3|5|2|3|2|2|3|0|0	1	1	1	1	1	8.51	0
MG132	RAB3GAP1	RAB3GAP1	28|14|21|18	81	20.25	4	3|1|1|1|1|0|1|2|6|8|0|2|6|6|4|2	1	1	1	1	1	7.36	0
MG132	LDHB	LDHB	46|42|46|46	180	45	4	12|3|7|5|5|6|6|4|9|8|8|8|7|3|3|5	1	1	1	1	1	7.27	0
MG132	PGRMC2	PGRMC2	140|161|161|158	620	155	4	21|2|7|5|7|10|8|10|24|23|8|10|13|11|21|23	1	1	1	1	1	12.22	0
MG132	CBS	CBS	35|42|35|28	140	35	4	10|2|7|6|8|4|7|5|11|9|4|2|6|6|3|3	1	1	1	1	1	6.02	0
MG132	ECI1	ECI1	25|21|18|18	82	20.5	4	5|1|0|0|0|0|0|0|0|0|0|0|0|0|0|0	1	1	1	1	1	54.67	0
MG132	VDAC2	VDAC2	130|140|126|140	536	134	4	32|6|35|38|37|37|23|27|45|44|39|37|37|36|28|30	1	1	1	1	1	4.04	0
MG132	C21orf33	C21orf33	25|39|28|28	120	30	4	5|0|0|0|0|1|0|0|0|0|2|0|2|0|0|1	1	1	1	1	1	43.64	0
MG132	UNC45A	UNC45A	63|70|70|56	259	64.75	4	14|7|6|14|12|14|16|16|23|23|20|18|19|13|22|23	1	1	1	1	1	3.98	0
MG132	DGKH	DGKH	32|25|32|35	124	31	4	0|0|0|0|0|0|0|0|0|0|0|0|0|0|0|0	1	1	1	1	1	310	0
MG132	PDZD8	PDZD8	42|42|35|56	175	43.75	4	2|0|0|0|0|0|1|0|3|3|0|0|0|0|0|1	1	1	1	1	1	70	0
MG132	GORASP2	GORASP2	18|18|11|11	58	14.5	4	4|1|0|0|0|0|0|7|7|7|0|0|0|0|3|0	0.98	0.99	0.98	0.99	0.98	8	0
MG132	SLC33A1	SLC33A1	28|25|18|25	96	24	4	1|0|0|0|0|0|1|0|0|2|0|0|0|0|1|1	1	1	1	1	1	64	0
MG132	NUPL1	NUPL1	11|11|14|14	50	12.5	4	3|3|3|3|4|3|0|1|2|3|2|2|5|5|8|5	0.99	1	0.99	1	0.99	3.85	0
MG132	EXD2	EXD2	7|11|18|14	50	12.5	4	0|0|0|0|0|0|0|0|0|0|0|0|0|0|0|0	1	1	1	1	1	125	0
MG132	PEX19	PEX19	60|63|56|74	253	63.25	4	5|0|0|0|0|0|0|0|2|2|0|0|0|0|0|0	1	1	1	1	1	112.44	0
MG132	GOLGA5	GOLGA5	42|21|42|39	144	36	4	0|0|0|0|0|0|0|0|0|0|0|0|0|0|0|0	1	1	1	1	1	360	0
MG132	PSME2	PSME2	35|42|28|32	137	34.25	4	6|2|3|5|0|1|0|2|0|0|4|1|5|7|0|0	1	1	1	1	1	15.22	0
MG132	ATG4B	ATG4B	11|7|4|7	29	7.25	4	1|0|0|0|0|0|0|0|1|2|0|0|0|0|0|0	1	1	1	1	1	29	0
MG132	DCXR	DCXR	7|7|7|7	28	7	4	0|0|0|0|0|0|0|0|0|0|0|0|0|0|0|0	1	1	1	1	1	70	0
MG132	AGPAT6	AGPAT6	25|28|32|25	110	27.5	4	0|0|0|0|0|0|0|1|0|0|0|0|0|0|0|0	1	1	1	1	1	275	0
MG132	STT3B	STT3B	28|32|28|35	123	30.75	4	5|0|6|2|2|2|4|6|0|2|2|3|5|3|0|0	1	1	1	1	1	11.71	0
MG132	SMC1A	SMC1A	63|81|84|74	302	75.5	4	19|5|19|13|15|17|16|22|20|15|14|18|16|14|12|16	1	1	1	1	1	4.81	0
MG132	IGF2BP3	IGF2BP3	63|56|67|70	256	64	4	15|14|12|9|16|11|17|11|17|19|16|12|17|17|8|14	1	1	1	1	1	4.55	0
MG132	CERS2	CERS2	11|7|7|4	29	7.25	4	3|0|1|1|1|1|0|0|0|0|0|2|1|1|1|3	0.98	1	0.98	1	0.98	7.73	0
MG132	RPS17	RPS17	81|81|74|63	299	74.75	4	13|10|15|13|10|10|12|25|13|9|14|15|13|10|2|0	1	1	1	1	1	6.5	0
MG132	UCHL5	UCHL5	14|14|14|7	49	12.25	4	3|0|0|0|0|0|2|3|1|2|0|0|2|1|0|1	1	1	1	1	1	13.07	0
MG132	GBF1	GBF1	11|4|4|4	23	5.75	4	0|0|0|0|0|0|0|0|0|0|0|0|0|0|0|0	1	1	1	1	1	57.5	0
MG132	SUN2	SUN2	18|14|11|14	57	14.25	4	0|0|0|0|0|0|0|0|0|0|0|0|0|0|0|0	1	1	1	1	1	142.5	0
MG132	ATAD1	ATAD1	11|11|14|14	50	12.5	4	4|0|0|3|0|2|0|5|0|3|0|0|0|1|1|2	1	1	1	1	1	9.52	0
MG132	YTHDF1	YTHDF1	21|21|11|18	71	17.75	4	5|0|5|6|4|5|1|0|3|3|4|4|4|3|9|7	0.94	1	0.94	1	0.94	4.51	0
MG132	HSPA4L	HSPA4L	56|60|70|74	260	65	4	0|0|0|0|0|0|0|0|0|0|0|0|0|0|0|0	1	1	1	1	1	650	0
MG132	FAM158A	FAM158A	21|21|25|25	92	23	4	0|0|0|0|0|0|0|0|0|0|0|0|0|0|0|0	1	1	1	1	1	230	0
MG132	TMEM57	TMEM57	42|39|35|42	158	39.5	4	0|0|0|0|0|0|0|0|0|0|0|0|0|0|0|0	1	1	1	1	1	395	0
MG132	HSPD1	HSPD1	441|431|553|529	1954	488.5	4	93|36|57|59|45|50|44|38|10|18|79|74|73|78|22|18	1	1	1	1	1	9.84	0
MG132	GLRX3	GLRX3	25|25|18|28	96	24	4	2|2|0|0|0|0|4|4|3|2|4|3|3|2|4|8	1	1	1	1	1	9.37	0
MG132	LRPPRC	LRPPRC	81|102|98|130	411	102.75	4	13|8|8|13|14|18|1|4|0|1|8|9|12|5|2|3	1	1	1	1	1	13.82	0
MG132	PFAS	PFAS	32|28|42|21	123	30.75	4	1|0|0|1|0|0|2|1|2|2|1|3|1|2|0|2	1	1	1	1	1	27.33	0
MG132	NDUFS1	NDUFS1	39|49|39|46	173	43.25	4	6|0|1|0|3|2|6|3|2|3|3|2|0|6|2|6	1	1	1	1	1	15.38	0
MG132	DLAT	DLAT	11|14|14|18	57	14.25	4	8|0|3|6|6|4|4|1|0|0|1|4|3|3|0|3	0.98	1	0.98	1	0.98	4.96	0
MG132	AUP1	AUP1	21|14|14|21	70	17.5	4	0|0|0|0|0|0|0|0|0|0|0|0|0|0|0|0	1	1	1	1	1	175	0
MG132	PELO	PELO	39|28|25|42	134	33.5	4	8|3|0|0|2|0|7|4|0|4|2|4|2|3|1|0	1	1	1	1	1	13.4	0
MG132	SGPL1	SGPL1	39|28|35|42	144	36	4	0|0|0|0|1|0|0|0|0|0|0|0|0|0|0|0	1	1	1	1	1	360	0
MG132	RBM15	RBM15	18|11|18|11	58	14.5	4	13|0|0|3|4|0|2|8|1|2|2|3|3|5|1|2	0.93	0.99	0.93	0.99	0.93	4.73	0
MG132	SARNP	SARNP	18|14|18|11	61	15.25	4	3|1|0|0|0|0|3|5|4|3|1|0|1|0|8|6	0.99	1	0.99	1	0.99	6.97	0
MG132	TMEM165	TMEM165	14|11|14|14	53	13.25	4	3|0|2|1|0|0|0|0|3|2|0|1|0|1|0|0	1	1	1	1	1	16.31	0
MG132	ATP5B	ATP5B	455|385|438|396	1674	418.5	4	113|41|63|51|70|52|75|74|54|52|97|106|97|97|54|61	1	1	1	1	1	5.79	0
MG132	PLOD1	PLOD1	28|28|32|35	123	30.75	4	6|1|7|6|5|4|0|0|0|0|0|2|4|5|0|1	1	1	1	1	1	12	0
MG132	SERPINH1	SERPINH1	88|98|95|95	376	94	4	19|4|14|10|13|12|10|10|10|8|24|30|24|27|16|17	1	1	1	1	1	6.06	0
MG132	NOP56	NOP56	46|49|53|60	208	52	4	31|11|17|8|15|11|12|12|14|9|16|20|14|20|17|12	0.99	1	0.99	1	0.99	3.48	0
MG132	PRDX3	PRDX3	88|88|112|105	393	98.25	4	14|6|7|8|13|6|7|12|3|3|6|4|8|7|2|5	1	1	1	1	1	14.16	0
MG132	COG3	COG3	28|35|35|32	130	32.5	4	4|2|1|2|2|6|0|4|3|1|2|2|3|3|0|0	1	1	1	1	1	14.86	0
MG132	MAVS	MAVS	32|28|25|28	113	28.25	4	6|2|4|5|3|3|3|3|6|9|3|3|4|3|3|7	1	1	1	1	1	6.75	0
MG132	FAM101B	FAM101B	14|21|18|21	74	18.5	4	0|0|0|0|0|0|0|0|0|0|0|0|0|0|0|0	1	1	1	1	1	185	0
MG132	SELS	SELS	7|11|7|14	39	9.75	4	0|0|0|0|0|0|0|0|0|0|0|0|0|0|0|0	1	1	1	1	1	97.5	0
MG132	DYNC1H1	DYNC1H1	431|417|410|413	1671	417.75	4	78|21|52|43|50|45|47|44|25|32|59|62|63|70|14|12	1	1	1	1	1	9.32	0
MG132	CCDC132	CCDC132	14|4|11|14	43	10.75	4	4|0|2|3|0|4|1|1|6|5|3|3|0|0|1|1	0.8	1	0.8	1	0.8	5.06	0.01
MG132	SUGP1	SUGP1	11|11|7|11	40	10	4	0|0|0|0|0|0|0|0|0|0|0|0|0|0|0|0	1	1	1	1	1	100	0
MG132	MYEF2	MYEF2	11|11|14|11	47	11.75	4	5|0|1|0|0|1|0|0|2|0|1|0|0|0|1|0	1	1	1	1	1	17.09	0
MG132	TIMM44	TIMM44	18|11|18|18	65	16.25	4	4|3|4|4|8|4|4|4|2|5|3|3|5|4|1|1	0.98	1	0.98	1	0.98	4.41	0
MG132	AKAP1	AKAP1	56|67|77|74	274	68.5	4	3|3|8|6|6|8|4|4|9|6|4|3|12|3|5|6	1	1	1	1	1	12.18	0
MG132	LPCAT1	LPCAT1	14|14|11|11	50	12.5	4	4|1|1|1|0|0|0|0|1|0|2|2|2|2|0|0	1	1	1	1	1	12.5	0
MG132	RAB7A	RAB7A	39|42|35|35	151	37.75	4	12|5|6|4|2|0|3|7|6|4|8|3|6|6|3|4	1	1	1	1	1	7.65	0
MG132	TUFM	TUFM	361|326|371|329	1387	346.75	4	52|13|40|39|45|35|52|44|47|54|72|72|67|53|25|32	1	1	1	1	1	7.48	0
MG132	HSPA6	HSPA6	354|385|375|406	1520	380	4	0|0|17|13|0|0|17|15|44|36|41|40|33|30|17|0	1	1	1	1	1	20.07	0
MG132	PRPSAP2	PRPSAP2	11|14|21|25	71	17.75	4	6|2|1|0|2|0|3|6|5|4|3|4|6|6|0|4	0.99	1	0.99	1	0.99	5.46	0
MG132	DST	DST	42|53|32|49	176	44	4	3|0|20|18|15|15|3|6|15|13|8|19|13|16|8|10	0.79	1	0.79	1	0.79	3.87	0.01
MG132	ACOT8	ACOT8	14|14|14|11	53	13.25	4	0|0|0|0|0|0|0|0|1|0|0|1|1|1|0|1	1	1	1	1	1	42.4	0
MG132	UBE2I	UBE2I	18|18|14|11	61	15.25	4	5|1|7|6|4|5|2|2|0|0|6|5|4|0|6|2	0.97	1	0.97	1	0.97	4.44	0
MG132	SOAT1	SOAT1	14|18|14|11	57	14.25	4	0|0|0|0|0|0|0|0|0|0|0|0|0|0|0|0	1	1	1	1	1	142.5	0
MG132	VCPIP1	VCPIP1	130|112|112|133	487	121.75	4	25|3|28|31|26|22|12|11|40|36|39|47|37|42|29|29	1	1	1	1	1	4.26	0
MG132	SSBP1	SSBP1	14|11|14|14	53	13.25	4	0|0|0|0|0|0|0|0|0|0|0|0|0|0|0|0	1	1	1	1	1	132.5	0
MG132	UBE2J1	UBE2J1	25|28|39|32	124	31	4	0|0|0|0|0|0|2|0|2|0|0|0|0|0|0|0	1	1	1	1	1	124	0
MG132	LBR	LBR	200|193|158|179	730	182.5	4	58|33|36|27|33|33|41|51|55|43|40|45|47|48|29|36	1	1	1	1	1	4.46	0
MG132	FAM49B	FAM49B	18|21|21|21	81	20.25	4	3|0|0|0|0|0|0|0|0|0|0|0|0|0|0|0	1	1	1	1	1	108	0
MG132	AURKB	AURKB	14|11|18|7	50	12.5	4	0|0|0|0|2|0|2|2|2|1|2|4|3|1|4|4	0.99	1	0.99	1	0.99	7.41	0
MG132	ZCCHC8	ZCCHC8	182|200|193|137	712	178	4	53|16|38|31|33|38|5|10|23|12|33|28|35|33|7|4	1	1	1	1	1	7.14	0
MG132	CUL3	CUL3	21|11|7|11	50	12.5	4	3|0|1|1|1|4|0|0|2|2|0|0|0|0|0|4	0.99	1	0.99	1	0.99	11.11	0
MG132	SEC22B	SEC22B	35|49|56|60	200	50	4	8|2|5|5|4|4|4|4|6|5|3|3|4|4|6|6	1	1	1	1	1	10.96	0
MG132	HNRNPH1	HNRNPH1	242|245|266|270	1023	255.75	4	55|33|67|62|52|59|40|40|43|45|47|47|38|53|22|27	1	1	1	1	1	5.61	0
MG132	KIAA1715	KIAA1715	28|21|28|25	102	25.5	4	0|0|0|0|0|0|0|0|0|0|0|0|0|0|0|0	1	1	1	1	1	255	0
MG132	ELAVL1	ELAVL1	56|70|60|74	260	65	4	16|0|11|9|10|15|18|18|10|18|16|14|15|18|14|7	1	1	1	1	1	4.98	0
MG132	SEC23A	SEC23A	42|39|46|63	190	47.5	4	0|6|7|0|5|0|7|6|8|7|1|2|0|3|6|6	1	1	1	1	1	11.88	0
MG132	HSPA4	HSPA4	126|126|137|133	522	130.5	4	16|7|7|11|10|5|17|19|36|35|12|10|17|14|8|6	1	1	1	1	1	9.08	0
MG132	BSG	BSG	28|21|14|25	88	22	4	7|2|1|2|0|2|3|2|0|1|7|4|5|3|2|3	1	1	1	1	1	8	0
MG132	SEC24C	SEC24C	32|25|39|35	131	32.75	4	4|2|7|4|5|4|1|0|0|0|3|3|4|5|0|0	1	1	1	1	1	12.48	0
MG132	COPS4	COPS4	11|18|14|21	64	16	4	0|0|0|0|0|0|0|0|0|0|0|0|0|0|0|0	1	1	1	1	1	160	0
MG132	MSH2	MSH2	49|49|53|42	193	48.25	4	14|10|7|11|8|6|20|17|31|25|15|10|13|13|8|9	0.89	1	0.89	1	0.89	3.56	0.01
MG132	POLD3	POLD3	25|25|21|18	89	22.25	4	5|5|3|6|8|6|10|8|9|8|6|6|7|7|4|7	0.97	1	0.97	1	0.97	3.39	0
MG132	GET4	GET4	14|14|18|18	64	16	4	2|1|0|0|0|0|0|0|1|2|0|0|0|0|2|1	1	1	1	1	1	28.44	0
MG132	IRS2	IRS2	18|14|18|18	68	17	4	0|0|0|0|0|0|0|0|0|0|0|0|0|0|0|0	1	1	1	1	1	170	0
MG132	DCTN2	DCTN2	49|49|49|53	200	50	4	10|1|15|10|12|8|14|16|20|19|13|18|20|13|10|14	1	1	1	1	1	3.76	0
MG132	LMNB2	LMNB2	21|28|18|18	85	21.25	4	11|0|2|3|0|3|10|11|5|6|1|0|2|0|0|0	0.98	1	0.98	1	0.98	6.3	0
MG132	ACADVL	ACADVL	7|11|4|11	33	8.25	4	4|0|0|0|0|0|0|0|0|0|0|0|0|0|0|0	0.99	1	0.99	1	0.99	33	0
MG132	PGD	PGD	18|18|28|28	92	23	4	8|7|13|12|10|11|2|0|3|4|7|8|7|7|0|1	0.78	1	0.78	1	0.78	3.68	0.01
MG132	NOSIP	NOSIP	14|21|25|21	81	20.25	4	5|1|4|3|3|4|10|6|9|8|0|0|0|1|8|13	0.91	0.99	0.91	0.99	0.91	4.32	0.01
MG132	UBQLN4	UBQLN4	18|14|18|11	61	15.25	4	0|0|0|0|0|0|0|0|0|0|0|0|0|0|0|0	1	1	1	1	1	152.5	0
MG132	SLC27A4	SLC27A4	35|28|35|46	144	36	4	0|0|0|0|0|0|0|0|0|0|0|0|0|0|1|0	1	1	1	1	1	360	0
MG132	TTF2	TTF2	14|11|11|7	43	10.75	4	0|0|0|0|0|0|0|0|0|0|0|0|0|0|0|0	1	1	1	1	1	107.5	0
MG132	TAB1	TAB1	21|14|14|18	67	16.75	4	0|0|0|0|0|0|0|0|0|0|0|0|0|0|0|0	1	1	1	1	1	167.5	0
MG132	DVL3	DVL3	151|130|158|144	583	145.75	4	0|0|0|0|0|0|0|0|0|0|0|0|0|0|0|0	1	1	1	1	1	1457.5	0
MG132	ABCB7	ABCB7	18|21|18|11	68	17	4	3|2|3|0|3|1|0|0|0|1|0|0|0|0|0|0	1	1	1	1	1	20.92	0
MG132	USP33	USP33	21|28|49|42	140	35	4	0|0|0|0|0|0|0|0|0|0|0|0|0|0|0|0	1	1	1	1	1	350	0
MG132	VPS13C	VPS13C	7|11|4|4	26	6.5	4	2|0|0|0|0|2|2|0|1|2|0|0|1|0|0|0	0.98	1	0.98	1	0.98	10.4	0
MG132	HSPH1	HSPH1	179|175|158|179	691	172.75	4	26|8|15|13|16|16|15|5|21|24|17|19|26|18|21|16	1	1	1	1	1	10.01	0
MG132	POLR1C	POLR1C	18|14|14|7	53	13.25	4	0|0|0|0|0|2|3|3|4|10|0|1|2|1|1|0	0.97	1	0.97	1	0.97	7.85	0
MG132	WDR41	WDR41	28|39|42|32	141	35.25	4	6|3|5|2|6|5|12|13|16|16|2|4|3|6|7|10	1	1	1	1	1	4.86	0
MG132	WAPAL	WAPAL	18|14|14|18	64	16	4	0|0|0|0|0|0|0|0|0|0|0|0|0|0|0|0	1	1	1	1	1	160	0
MG132	ACSL3	ACSL3	42|49|49|49	189	47.25	4	4|0|0|0|0|0|4|0|6|5|0|4|0|2|7|5	1	1	1	1	1	20.43	0
MG132	ARF6	ARF6	18|21|14|14	67	16.75	4	6|3|5|5|6|3|3|6|7|5|3|6|2|4|3|5	0.98	1	0.98	1	0.98	3.72	0
MG132	ARL1	ARL1	63|53|74|56	246	61.5	4	9|1|5|2|9|8|6|5|8|11|13|15|8|11|2|6	1	1	1	1	1	8.27	0
MG132	ATP1B3	ATP1B3	28|32|21|25	106	26.5	4	7|0|3|4|3|1|2|2|2|1|0|2|0|0|0|1	1	1	1	1	1	15.14	0
MG132	ATP5O	ATP5O	63|60|74|67	264	66	4	16|6|12|12|11|16|6|5|4|5|6|5|11|13|0|0	1	1	1	1	1	8.25	0
MG132	CALM2	CALM2	11|14|7|4	36	9	4	0|0|0|0|0|0|0|0|0|0|0|0|0|0|0|0	1	1	1	1	1	90	0
MG132	CAMLG	CAMLG	46|28|42|28	144	36	4	4|3|2|0|0|0|3|0|4|3|0|0|2|0|0|0	1	1	1	1	1	27.43	0
MG132	CAPNS1	CAPNS1	11|11|4|11	37	9.25	4	2|2|0|1|1|0|0|0|0|0|0|0|0|0|0|0	1	1	1	1	1	24.67	0
MG132	CSTB	CSTB	53|53|60|53	219	54.75	4	4|0|5|3|3|3|9|6|0|0|4|4|2|3|2|2	1	1	1	1	1	17.52	0
MG132	DGKE	DGKE	18|14|18|21	71	17.75	4	1|1|0|0|0|0|0|0|0|1|0|0|0|0|0|1	1	1	1	1	1	71	0
MG132	DPM1	DPM1	35|35|35|35	140	35	4	16|8|0|4|7|6|9|7|7|5|9|7|14|9|8|7	1	1	1	1	1	4.55	0
MG132	EEF1G	EEF1G	112|116|126|133	487	121.75	4	16|6|18|15|15|17|29|29|28|46|28|31|26|31|23|25	1	1	1	1	1	5.09	0
MG132	EEF2	EEF2	410|368|364|385	1527	381.75	4	120|57|82|62|61|56|74|70|144|160|104|100|103|87|86|98	1	1	1	1	1	4.17	0
MG132	EIF2S3	EIF2S3	39|49|49|39	176	44	4	13|2|12|13|8|13|14|16|17|14|7|10|9|5|8|15	1	1	1	1	1	4	0
MG132	EIF3F	EIF3F	35|42|35|39	151	37.75	4	11|2|11|7|8|6|11|13|10|12|13|10|13|12|11|15	1	1	1	1	1	3.66	0
MG132	EIF3E	EIF3E	88|88|88|84	348	87	4	18|9|19|16|12|10|13|11|17|20|15|16|16|21|3|1	1	1	1	1	1	6.41	0
MG132	FKBP4	FKBP4	105|98|105|81	389	97.25	4	12|3|11|11|15|7|10|7|8|8|6|8|10|12|5|4	1	1	1	1	1	11.36	0
MG132	KDSR	KDSR	7|7|4|7	25	6.25	4	0|0|0|0|0|0|0|0|0|0|0|0|0|0|0|0	1	1	1	1	1	62.5	0
MG132	GALK1	GALK1	14|11|21|7	53	13.25	4	4|6|3|6|4|2|3|0|1|2|4|2|3|1|2|2	0.9	1	0.9	1	0.9	4.71	0.01
MG132	STBD1	STBD1	21|21|35|28	105	26.25	4	0|0|0|0|0|0|0|0|0|0|0|0|0|0|0|0	1	1	1	1	1	262.5	0
MG132	GMPS	GMPS	112|130|133|154	529	132.25	4	39|19|20|19|17|24|41|36|49|53|15|14|17|21|19|16	1	1	1	1	1	5.05	0
MG132	HADHB	HADHB	25|14|18|18	75	18.75	4	0|0|0|1|2|0|3|2|0|4|0|2|1|1|0|3	1	1	1	1	1	15.79	0
MG132	HPRT1	HPRT1	25|28|32|35	120	30	4	4|2|4|3|6|4|8|5|1|1|5|2|5|3|0|0	1	1	1	1	1	9.06	0
MG132	DNAJA1	DNAJA1	81|53|67|74	275	68.75	4	14|4|11|6|7|6|13|8|11|9|8|5|10|8|7|12	1	1	1	1	1	7.91	0
MG132	HSPB1	HSPB1	28|28|28|21	105	26.25	4	0|0|1|0|2|2|0|0|0|0|4|4|5|3|3|3	1	1	1	1	1	15.56	0
MG132	KPNA2	KPNA2	98|112|88|70	368	92	4	21|8|13|7|10|7|3|3|1|2|8|3|7|9|12|11	1	1	1	1	1	11.78	0
MG132	MAD2L1	MAD2L1	11|7|11|18	47	11.75	4	1|0|1|3|2|1|3|1|5|7|0|0|1|2|0|0	0.97	1	0.97	1	0.97	6.96	0
MG132	DEGS1	DEGS1	35|32|32|25	124	31	4	0|0|0|0|0|0|0|0|0|0|0|0|0|0|0|0	1	1	1	1	1	310	0
MG132	MSI1	MSI1	11|14|14|14	53	13.25	4	0|1|0|1|0|0|1|2|0|0|0|0|0|0|0|0	1	1	1	1	1	42.4	0
MG132	PEX3	PEX3	14|11|25|21	71	17.75	4	0|0|0|0|0|0|0|0|0|0|0|0|0|0|0|0	1	1	1	1	1	177.5	0
MG132	PHB	PHB	147|151|126|133	557	139.25	4	33|15|24|24|26|25|29|17|19|17|47|42|38|36|17|17	1	1	1	1	1	5.23	0
MG132	SLC25A3	SLC25A3	105|88|84|98	375	93.75	4	22|12|15|12|16|6|19|24|16|14|17|20|15|16|5|6	1	1	1	1	1	6.38	0
MG132	POLR2A	POLR2A	39|42|32|25	138	34.5	4	4|0|0|0|2|0|3|2|5|5|2|0|2|2|0|5	1	1	1	1	1	17.25	0
MG132	POLR2B	POLR2B	25|14|18|14	71	17.75	4	3|1|3|3|3|7|6|5|4|6|6|5|2|3|5|5	0.99	1	0.99	1	0.99	4.24	0
MG132	PPP2CA	PPP2CA	28|32|28|39	127	31.75	4	11|2|4|4|7|3|8|8|13|13|5|4|4|4|11|12	1	1	1	1	1	4.5	0
MG132	PSMA2	PSMA2	74|63|67|88	292	73	4	1|2|0|2|1|0|3|2|2|3|2|4|4|3|0|0	1	1	1	1	1	40.28	0
MG132	PSMB1	PSMB1	74|77|81|70	302	75.5	4	0|0|0|0|0|0|0|0|0|0|0|0|0|0|0|0	1	1	1	1	1	755	0
MG132	PSMB7	PSMB7	28|25|25|28	106	26.5	4	0|0|0|0|0|0|0|0|0|0|0|0|0|0|0|0	1	1	1	1	1	265	0
MG132	PTPN1	PTPN1	109|116|112|116	453	113.25	4	17|0|4|1|5|2|8|5|11|18|5|7|7|7|14|11	1	1	1	1	1	14.85	0
MG132	RCN2	RCN2	18|4|11|7	40	10	4	0|0|0|0|0|0|0|0|0|0|0|0|0|0|0|0	1	1	1	1	1	100	0
MG132	RPL23	RPL23	91|91|77|70	329	82.25	4	28|6|21|13|17|18|10|20|32|29|32|31|20|24|19|23	0.99	1	0.99	1	0.99	3.84	0
MG132	RPL19	RPL19	46|42|42|49	179	44.75	4	10|0|8|8|10|7|15|12|16|12|7|8|8|8|6|8	1	1	1	1	1	5.01	0
MG132	RPL24	RPL24	49|60|56|53	218	54.5	4	15|0|17|11|20|22|15|16|16|17|24|22|19|22|11|16	0.97	1	0.97	1	0.97	3.32	0
MG132	RPL27	RPL27	39|46|42|32	159	39.75	4	11|1|11|13|10|14|14|12|5|6|21|19|17|14|5|7	0.84	1	0.84	1	0.84	3.53	0.01
MG132	RPL38	RPL38	28|46|42|25	141	35.25	4	13|0|11|9|6|9|6|9|3|3|15|18|14|14|7|7	0.78	1	0.78	1	0.78	3.92	0.01
MG132	RPN1	RPN1	133|126|123|140	522	130.5	4	29|5|22|18|21|9|20|22|25|20|20|29|22|20|17|13	1	1	1	1	1	6.69	0
MG132	RPS13	RPS13	35|35|46|35	151	37.75	4	11|5|11|6|15|11|11|8|0|0|16|13|16|16|4|4	0.99	1	0.99	1	0.99	4.11	0
MG132	RPS15	RPS15	98|112|102|95	407	101.75	4	28|29|19|14|17|15|41|41|18|27|15|12|14|17|4|6	1	1	1	1	1	5.14	0
MG132	RPS19	RPS19	18|18|25|21	82	20.5	4	7|0|7|5|6|6|5|4|2|1|8|5|8|8|4|4	1	1	1	1	1	4.1	0
MG132	RPS21	RPS21	28|32|28|28	116	29	4	4|4|4|2|4|6|7|7|8|7|4|5|5|6|5|5	1	1	1	1	1	5.59	0
MG132	RPS23	RPS23	39|42|35|46	162	40.5	4	8|4|8|5|5|7|5|3|5|5|13|13|12|7|8|6	1	1	1	1	1	5.68	0
MG132	RPS25	RPS25	32|35|28|35	130	32.5	4	10|3|9|10|8|10|12|15|10|11|0|0|3|3|9|10	1	1	1	1	1	4.23	0
MG132	RPS28	RPS28	21|21|21|21	84	21	4	6|0|6|3|6|3|10|11|5|6|6|7|6|7|4|4	1	1	1	1	1	3.73	0
MG132	RPS7	RPS7	228|200|175|193	796	199	4	54|41|43|36|44|37|58|58|52|43|47|52|49|53|46|39	1	1	1	1	1	4.23	0
MG132	IQGAP1	IQGAP1	53|67|67|60	247	61.75	4	17|2|16|11|12|5|8|4|2|5|5|4|0|4|3|3	1	1	1	1	1	9.78	0
MG132	FSCN1	FSCN1	7|11|7|4	29	7.25	4	0|0|2|1|1|2|0|0|0|0|0|0|0|0|0|0	1	1	1	1	1	19.33	0
MG132	STAM	STAM	35|49|32|39	155	38.75	4	11|2|7|4|9|8|4|10|21|15|12|9|10|10|7|14	0.99	1	0.99	1	0.99	4.05	0
MG132	HSP90B1	HSP90B1	77|77|105|91	350	87.5	4	23|3|15|16|25|20|11|12|4|5|35|32|35|32|2|2	1	1	1	1	1	5.15	0
MG132	TTC1	TTC1	25|18|4|14	61	15.25	4	2|1|0|0|0|1|2|3|4|4|2|1|0|2|2|1	0.9	1	0.9	1	0.9	9.76	0.01
MG132	VDAC1	VDAC1	144|161|144|133	582	145.5	4	35|2|28|20|23|26|38|38|29|43|47|36|32|45|23|22	1	1	1	1	1	4.78	0
MG132	XPO1	XPO1	133|147|102|119	501	125.25	4	42|21|26|21|14|20|33|27|17|17|41|40|40|48|4|4	1	1	1	1	1	4.83	0
MG132	YARS	YARS	119|102|112|119	452	113	4	23|6|16|24|24|20|19|16|15|18|32|29|26|32|4|6	1	1	1	1	1	5.83	0
MG132	ESYT2	ESYT2	77|81|95|105	358	89.5	4	16|4|6|5|7|7|5|7|15|9|3|5|0|5|10|9	1	1	1	1	1	12.67	0
MG132	DARS	DARS	77|67|74|63	281	70.25	4	29|0|18|19|14|17|21|19|13|16|22|20|24|26|8|13	1	1	1	1	1	4.03	0
MG132	ACAT1	ACAT1	42|56|67|56	221	55.25	4	12|5|13|14|10|11|12|13|6|7|10|6|13|10|3|2	1	1	1	1	1	6.01	0
MG132	AP2B1	AP2B1	91|112|77|109	389	97.25	4	30|18|19|23|21|23|22|17|14|17|20|17|16|19|24|29	1	1	1	1	1	4.73	0
MG132	EMD	EMD	130|123|130|126	509	127.25	4	16|11|14|16|11|13|15|15|21|22|10|10|14|11|15|14	1	1	1	1	1	8.93	0
MG132	GLE1	GLE1	7|7|4|7	25	6.25	4	0|0|0|0|0|0|0|0|0|0|0|0|0|0|0|0	1	1	1	1	1	62.5	0
MG132	C19orf63	C19orf63	35|32|35|32	134	33.5	4	0|0|0|0|0|0|0|0|0|0|0|0|0|0|0|0	1	1	1	1	1	335	0
MG132	RHOG	RHOG	11|4|4|7	26	6.5	4	2|0|2|0|1|0|0|0|1|1|0|0|1|0|0|0	1	1	1	1	1	13	0
MG132	IARS2	IARS2	18|18|14|18	68	17	4	4|3|3|2|3|4|4|6|5|5|0|0|2|0|0|0	1	1	1	1	1	6.63	0
MG132	ADA	ADA	18|18|11|18	65	16.25	4	0|0|0|0|0|0|0|0|0|0|0|0|0|0|0|0	1	1	1	1	1	162.5	0
MG132	PRKAR2B	PRKAR2B	35|18|21|14	88	22	4	6|5|8|3|3|4|4|6|9|8|5|5|5|4|3|3	0.96	1	0.96	1	0.96	4.35	0
MG132	EIF4E2	EIF4E2	7|18|7|7	39	9.75	4	0|0|0|0|0|0|0|0|0|0|0|0|0|0|0|0	1	1	1	1	1	97.5	0
MG132	ARHGAP1	ARHGAP1	18|18|21|21	78	19.5	4	2|0|0|0|0|2|2|4|9|9|0|0|0|0|7|7	0.99	0.99	0.99	0.99	0.99	7.43	0
MG132	BAG2	BAG2	49|49|46|46	190	47.5	4	5|1|12|5|6|3|2|5|5|6|5|4|3|6|6|5	1	1	1	1	1	9.62	0
MG132	BUB3	BUB3	35|46|42|46	169	42.25	4	10|0|8|8|10|8|20|18|20|18|7|6|5|5|8|6	0.99	1	0.99	1	0.99	4.31	0
MG132	COPB2	COPB2	11|35|28|21	95	23.75	4	3|0|3|1|1|1|2|3|6|5|1|3|3|2|1|4	1	1	1	1	1	9.74	0
MG132	FARSA	FARSA	67|77|88|56	288	72	4	29|7|21|18|19|15|20|19|17|28|8|11|9|14|10|5	1	1	1	1	1	4.61	0
MG132	JUN	JUN	11|14|14|4	43	10.75	4	0|0|0|0|0|0|0|0|0|0|0|0|0|0|0|0	1	1	1	1	1	107.5	0
MG132	KIF5B	KIF5B	172|161|165|158	656	164	4	34|21|41|43|46|37|45|46|73|83|54|57|49|45|31|32	0.89	1	0.89	1	0.89	3.56	0.01
MG132	NDUFA10	NDUFA10	35|21|32|32	120	30	4	7|3|6|3|8|6|5|1|0|0|10|12|12|10|7|9	0.98	1	0.98	1	0.98	4.85	0
MG132	NDUFS3	NDUFS3	18|14|28|21	81	20.25	4	10|3|5|2|3|6|3|4|2|4|7|5|10|6|3|6	0.97	1	0.97	1	0.97	4.1	0
MG132	PEX14	PEX14	60|53|53|60	226	56.5	4	0|0|0|0|0|0|0|0|0|0|0|0|0|0|0|0	1	1	1	1	1	565	0
MG132	ATP6V1H	ATP6V1H	28|18|21|14	81	20.25	4	8|3|3|7|3|4|3|2|4|4|2|1|2|3|2|2	1	1	1	1	1	6.11	0
MG132	ITSN1	ITSN1	11|11|11|11	44	11	4	0|0|0|0|0|0|0|0|0|0|0|0|0|0|0|0	1	1	1	1	1	110	0
MG132	OXSR1	OXSR1	14|21|18|21	74	18.5	4	1|0|1|4|2|0|2|2|2|2|1|0|1|1|2|1	1	1	1	1	1	13.45	0
MG132	TPD52	TPD52	14|25|25|21	85	21.25	4	7|2|3|2|4|2|7|8|6|8|5|3|6|4|7|8	0.98	1	0.98	1	0.98	4.15	0
MG132	SMC3	SMC3	70|84|77|81	312	78	4	29|9|21|21|21|17|18|17|17|11|16|21|21|19|19|26	1	1	1	1	1	4.12	0
MG132	AKAP8L	AKAP8L	35|25|32|42	134	33.5	4	6|0|7|3|7|6|2|2|1|2|6|3|6|6|2|3	1	1	1	1	1	8.65	0
MG132	RPL7L1	RPL7L1	28|25|42|35	130	32.5	4	9|5|5|5|4|3|5|6|1|3|8|5|6|8|5|5	1	1	1	1	1	6.27	0
MG132	ACTR1A	ACTR1A	35|32|42|53	162	40.5	4	9|0|18|17|11|6|9|6|10|15|12|19|15|12|7|8	0.9	1	0.9	1	0.9	3.72	0.01
MG132	ACTR2	ACTR2	11|21|18|11	61	15.25	4	3|0|3|3|2|2|2|4|4|5|3|0|0|0|4|4	1	1	1	1	1	6.26	0
MG132	BET1	BET1	14|21|14|25	74	18.5	4	1|0|0|0|0|0|2|1|5|6|0|0|0|0|0|0	1	1	1	1	1	19.73	0
MG132	CFL1	CFL1	140|126|130|126	522	130.5	4	37|19|21|17|27|21|36|44|31|32|31|28|29|30|18|24	1	1	1	1	1	4.69	0
MG132	UBXN8	UBXN8	53|49|70|49	221	55.25	4	0|0|0|0|0|0|0|0|0|0|0|0|0|0|0|0	1	1	1	1	1	552.5	0
MG132	FLOT1	FLOT1	25|18|18|28	89	22.25	4	4|0|1|1|0|1|1|0|0|0|0|1|0|0|0|0	1	1	1	1	1	39.56	0
MG132	DNAJA2	DNAJA2	91|95|88|88	362	90.5	4	14|7|6|12|4|3|11|10|21|18|7|12|9|7|10|9	1	1	1	1	1	9.05	0
MG132	LMAN1	LMAN1	91|88|77|91	347	86.75	4	2|0|1|0|0|0|0|0|1|0|0|0|2|0|2|0	1	1	1	1	1	173.5	0
MG132	PDIA6	PDIA6	98|102|98|102	400	100	4	33|15|27|13|21|21|12|9|4|3|15|11|16|14|12|10	1	1	1	1	1	6.78	0
MG132	NAMPT	NAMPT	105|88|98|119	410	102.5	4	40|16|26|21|21|25|19|22|15|15|28|27|30|32|13|12	1	1	1	1	1	4.53	0
MG132	PSMD14	PSMD14	42|39|25|46	152	38	4	17|12|10|11|7|9|3|3|3|4|5|6|14|9|4|2	0.98	1	0.98	1	0.98	5.11	0
MG132	PURA	PURA	32|28|35|28	123	30.75	4	11|8|0|0|1|4|0|3|0|0|5|8|7|9|0|0	1	1	1	1	1	8.79	0
MG132	KIF20A	KIF20A	21|7|14|14	56	14	4	0|0|0|0|0|0|0|0|0|0|0|0|0|0|0|0	1	1	1	1	1	140	0
MG132	RHEB	RHEB	25|14|25|25	89	22.25	4	8|0|10|5|9|8|5|9|4|5|4|6|5|6|6|6	0.8	1	0.8	1	0.8	3.71	0.01
MG132	RPS14	RPS14	77|77|63|70	287	71.75	4	20|5|13|18|17|12|16|30|24|22|21|22|26|20|15|13	1	1	1	1	1	3.9	0
MG132	UQCRC2	UQCRC2	221|263|210|242	936	234	4	35|5|34|29|38|31|19|22|15|13|37|40|30|35|19|13	1	1	1	1	1	9.02	0
MG132	ERGIC2	ERGIC2	14|14|11|11	50	12.5	4	3|2|0|0|2|2|0|0|0|0|0|1|0|1|0|0	1	1	1	1	1	18.18	0
MG132	ADCY9	ADCY9	140|158|116|158	572	143	4	0|0|0|0|0|0|0|0|0|0|0|0|0|0|0|0	1	1	1	1	1	1430	0
MG132	CLPP	CLPP	25|32|28|32	117	29.25	4	5|0|6|0|7|3|0|0|1|0|4|5|3|3|1|0	1	1	1	1	1	12.32	0
MG132	GNB2L1	GNB2L1	172|179|172|165	688	172	4	60|13|47|41|50|34|26|34|48|45|63|60|57|55|34|32	1	1	1	1	1	3.94	0
MG132	NDC80	NDC80	14|14|21|14	63	15.75	4	0|0|0|0|0|0|0|0|0|0|0|0|0|0|0|0	1	1	1	1	1	157.5	0
MG132	COX4NB	COX4NB	116|116|112|119	463	115.75	4	1|0|0|1|0|0|0|1|0|0|1|1|0|0|2|0	1	1	1	1	1	264.57	0
MG132	NCLN	NCLN	35|42|32|28	137	34.25	4	8|1|3|5|4|2|2|1|0|2|9|5|9|6|0|9	1	1	1	1	1	8.3	0
MG132	SIN3B	SIN3B	88|84|91|91	354	88.5	4	0|0|0|0|0|0|0|0|0|0|0|0|0|0|0|0	1	1	1	1	1	885	0
MG132	FKBP8	FKBP8	35|42|42|46	165	41.25	4	7|0|6|0|5|7|2|4|2|2|3|1|1|0|0|1	1	1	1	1	1	16.1	0
MG132	PSMD4	PSMD4	63|74|70|60	267	66.75	4	15|5|11|10|11|6|8|8|14|17|10|15|15|12|10|11	1	1	1	1	1	6	0
MG132	SCD	SCD	11|7|11|7	36	9	4	0|0|0|0|0|1|1|1|1|1|1|1|0|0|4|3	1	1	1	1	1	10.29	0
MG132	ARL6IP5	ARL6IP5	25|32|35|56	148	37	4	9|1|6|3|3|2|4|2|3|3|0|0|0|0|2|2	1	1	1	1	1	14.8	0
MG132	CDIPT	CDIPT	28|18|28|28	102	25.5	4	11|2|0|3|5|6|5|3|2|4|5|2|5|8|1|4	1	1	1	1	1	6.18	0
MG132	TACC3	TACC3	14|25|21|32	92	23	4	0|0|0|0|0|0|0|0|0|0|0|0|0|0|0|0	1	1	1	1	1	230	0
MG132	TSG101	TSG101	18|14|11|7	50	12.5	4	0|0|0|0|0|0|0|0|0|0|0|0|0|0|0|0	1	1	1	1	1	125	0
MG132	NUP160	NUP160	11|11|18|28	68	17	4	13|2|6|4|3|3|4|3|2|1|3|0|3|3|4|3	0.9	1	0.9	1	0.9	4.77	0.01
MG132	XAB2	XAB2	11|18|21|11	61	15.25	4	0|0|0|0|0|0|0|0|0|0|0|0|0|0|0|0	1	1	1	1	1	152.5	0
MG132	NCL	NCL	235|221|249|238	943	235.75	4	53|26|47|47|39|37|72|71|62|69|62|57|63|57|36|37	1	1	1	1	1	4.52	0
MG132	IGF2BP2	IGF2BP2	53|53|81|77	264	66	4	23|10|11|9|13|12|16|11|25|28|16|11|15|17|16|20	1	1	1	1	1	4.17	0
MG132	STUB1	STUB1	63|60|70|74	267	66.75	4	6|5|12|10|10|9|3|5|11|12|4|6|8|6|5|6	1	1	1	1	1	9.05	0
MG132	CISD2	CISD2	49|42|56|42	189	47.25	4	2|0|0|0|0|0|0|1|0|0|1|0|0|0|0|0	1	1	1	1	1	189	0
MG132	DNAJC16	DNAJC16	14|4|14|11	43	10.75	4	0|0|0|0|0|0|0|0|0|0|0|0|0|0|0|0	1	1	1	1	1	107.5	0
MG132	FAM98A	FAM98A	18|14|18|14	64	16	4	0|0|4|5|3|1|6|5|4|2|3|4|2|1|3|3	1	1	1	1	1	5.57	0
MG132	ATF6	ATF6	39|35|35|42	151	37.75	4	0|0|0|0|0|0|0|0|0|0|0|0|0|0|0|0	1	1	1	1	1	377.5	0
MG132	TFIP11	TFIP11	70|56|49|49	224	56	4	0|0|0|0|0|0|0|0|0|0|0|0|0|0|0|0	1	1	1	1	1	560	0
MG132	SLC30A9	SLC30A9	25|21|28|21	95	23.75	4	0|0|0|0|0|0|0|0|0|0|0|0|0|0|0|0	1	1	1	1	1	237.5	0
MG132	PGRMC1	PGRMC1	60|60|53|74	247	61.75	4	12|4|10|6|5|7|10|7|3|4|16|12|15|11|2|5	1	1	1	1	1	7.66	0
MG132	NUDC	NUDC	182|193|168|179	722	180.5	4	41|5|31|27|37|27|39|42|89|85|48|52|42|34|62|50	0.96	1	0.96	1	0.96	4.06	0
MG132	SCAMP2	SCAMP2	14|11|14|14	53	13.25	4	1|0|0|0|0|0|0|0|0|0|0|0|0|0|0|0	1	1	1	1	1	132.5	0
MG132	YKT6	YKT6	186|210|189|193	778	194.5	4	25|2|8|4|6|8|35|34|22|29|9|9|12|12|38|40	1	1	1	1	1	10.62	0
MG132	LARP4B	LARP4B	21|25|28|25	99	24.75	4	14|6|8|8|4|9|8|14|6|8|7|7|7|7|6|4	0.99	1	0.99	1	0.99	3.22	0
MG132	IBTK	IBTK	18|21|11|28	78	19.5	4	0|0|0|0|0|0|0|0|0|0|0|0|0|0|0|0	1	1	1	1	1	195	0
MG132	MLLT11	MLLT11	28|32|35|35	130	32.5	4	0|0|0|0|0|0|0|0|0|0|0|0|0|0|0|0	1	1	1	1	1	325	0
MG132	HNRNPA0	HNRNPA0	74|67|67|67	275	68.75	4	24|0|17|19|17|10|21|20|14|16|20|21|21|24|13|15	1	1	1	1	1	4.04	0
MG132	STIP1	STIP1	102|88|109|102	401	100.25	4	7|0|6|6|6|3|5|4|9|12|13|11|9|11|8|6	1	1	1	1	1	13.83	0
MG132	HERPUD1	HERPUD1	28|39|42|35	144	36	4	0|0|0|0|0|0|0|0|0|0|0|0|0|0|0|0	1	1	1	1	1	360	0
MG132	HAUS8	HAUS8	11|11|14|18	54	13.5	4	0|0|0|0|0|0|0|0|0|0|0|0|0|0|0|0	1	1	1	1	1	135	0
MG132	YRDC	YRDC	11|11|14|11	47	11.75	4	0|0|0|0|2|0|1|0|0|0|0|0|0|0|0|0	1	1	1	1	1	62.67	0
MG132	CDC37	CDC37	74|63|67|56	260	65	4	12|8|12|16|12|16|7|10|24|23|9|9|11|11|7|4	1	1	1	1	1	5.45	0
MG132	SNRPD1	SNRPD1	35|28|28|35	126	31.5	4	8|1|9|6|9|5|8|9|8|6|11|10|7|5|8|6	1	1	1	1	1	4.34	0
MG132	BUB1B	BUB1B	95|109|81|95	380	95	4	0|0|0|0|0|0|0|0|0|0|0|0|0|0|0|0	1	1	1	1	1	950	0
MG132	RPSA	RPSA	60|60|60|53	233	58.25	4	11|1|6|7|11|7|12|8|10|10|7|4|6|4|9|8	1	1	1	1	1	7.7	0
MG132	CHP	CHP	14|11|11|7	43	10.75	4	0|0|0|0|0|0|0|0|0|0|0|0|0|0|0|0	1	1	1	1	1	107.5	0
MG132	PRAF2	PRAF2	11|11|14|14	50	12.5	4	2|0|3|0|1|2|0|0|0|0|1|1|1|3|0|0	1	1	1	1	1	14.29	0
MG132	TWF2	TWF2	14|14|11|11	50	12.5	4	0|0|3|5|0|0|3|5|4|4|2|1|2|1|2|5	1	1	1	1	1	5.41	0
MG132	SEC63	SEC63	81|70|53|81	285	71.25	4	8|0|0|0|2|3|6|2|1|1|5|4|3|4|10|8	1	1	1	1	1	20	0
MG132	SEC61G	SEC61G	21|14|25|18	78	19.5	4	10|6|6|7|2|10|3|4|0|0|3|3|5|5|0|0	0.97	1	0.97	1	0.97	4.88	0
MG132	HUWE1	HUWE1	116|130|116|102	464	116	4	10|3|10|5|7|10|9|4|4|2|9|7|5|7|2|1	1	1	1	1	1	19.54	0
MG132	SEH1L	SEH1L	14|7|7|18	46	11.5	4	2|0|0|1|3|2|0|2|1|2|0|0|0|0|3|4	0.99	1	0.99	1	0.99	9.2	0
MG132	SLC3A2	SLC3A2	91|84|81|77	333	83.25	4	3|1|1|1|0|0|2|2|0|2|0|0|0|0|4|2	1	1	1	1	1	74	0
MG132	IPO4	IPO4	25|11|18|28	82	20.5	4	7|6|3|4|4|3|5|6|2|4|4|4|6|9|2|0	0.92	1	0.92	1	0.92	4.75	0
MG132	BAG5	BAG5	18|18|21|21	78	19.5	4	0|0|0|0|0|0|0|0|0|0|0|0|0|0|0|0	1	1	1	1	1	195	0
MG132	RINT1	RINT1	35|18|28|21	102	25.5	4	3|0|0|0|2|0|0|1|2|2|0|1|2|0|2|2	1	1	1	1	1	24	0
MG132	LLGL1	LLGL1	11|14|11|18	54	13.5	4	0|0|0|0|0|0|3|0|4|4|1|0|1|0|4|4	1	1	1	1	1	10.29	0
MG132	VANGL2	VANGL2	35|49|28|28	140	35	4	0|0|0|0|0|0|0|0|0|1|0|0|0|0|0|0	1	1	1	1	1	350	0
MG132	TMEM209	TMEM209	56|67|63|67	253	63.25	4	0|0|0|0|0|0|0|0|0|0|0|2|0|0|0|0	1	1	1	1	1	506	0
MG132	NDUFA9	NDUFA9	60|67|63|56	246	61.5	4	14|7|4|13|13|10|9|7|5|6|7|9|10|13|7|6	1	1	1	1	1	7.03	0
MG132	IMPDH2	IMPDH2	49|53|70|56	228	57	4	3|0|5|5|5|4|1|4|1|0|2|2|6|5|0|2	1	1	1	1	1	20.27	0
MG132	SKIV2L	SKIV2L	14|14|4|18	50	12.5	4	3|1|1|2|1|6|1|0|3|2|3|2|2|0|1|0	0.86	1	0.86	1	0.86	7.14	0.01
MG132	DHX29	DHX29	11|7|7|4	29	7.25	4	0|0|0|0|0|0|0|0|0|0|0|0|0|0|0|0	1	1	1	1	1	72.5	0
MG132	AHSA1	AHSA1	116|102|119|123	460	115	4	27|7|17|10|24|21|24|26|35|33|30|25|24|25|42|38	1	1	1	1	1	4.51	0
MG132	LETM1	LETM1	14|25|14|18	71	17.75	4	0|0|0|0|0|0|0|0|0|0|0|0|0|0|0|0	1	1	1	1	1	177.5	0
MG132	NUBP2	NUBP2	21|11|18|25	75	18.75	4	9|6|5|3|3|5|7|8|4|5|2|2|3|6|2|0	0.87	1	0.87	1	0.87	4.29	0.01
MG132	PEF1	PEF1	21|18|14|18	71	17.75	4	5|4|2|0|1|0|5|5|0|1|3|4|4|4|0|0	1	1	1	1	1	7.47	0
MG132	PREB	PREB	77|49|74|70	270	67.5	4	6|0|0|0|0|0|0|2|0|5|0|0|0|0|0|1	1	1	1	1	1	77.14	0
MG132	TBK1	TBK1	39|39|35|42	155	38.75	4	10|0|8|9|9|9|1|1|8|7|7|8|12|9|1|0	1	1	1	1	1	6.26	0
MG132	ECH1	ECH1	95|109|84|91	379	94.75	4	13|5|22|19|15|14|1|0|0|1|24|28|22|20|0|0	1	1	1	1	1	8.24	0
MG132	STOML2	STOML2	67|81|60|70	278	69.5	4	17|9|7|13|6|9|4|8|1|1|10|9|9|9|0|1	1	1	1	1	1	9.84	0
MG132	SPAG5	SPAG5	25|28|25|28	106	26.5	4	0|0|0|0|0|0|0|0|0|0|0|0|0|0|0|0	1	1	1	1	1	265	0
MG132	HEATR1	HEATR1	32|25|21|28	106	26.5	4	13|12|4|4|7|5|6|6|6|6|4|3|4|4|7|5	1	1	1	1	1	4.42	0
MG132	ADAM17	ADAM17	11|11|18|21	61	15.25	4	0|0|0|0|0|0|0|0|0|0|0|0|0|0|0|0	1	1	1	1	1	152.5	0
MG132	HNRNPH2	HNRNPH2	74|77|84|95	330	82.5	4	17|12|26|21|17|18|1|10|0|11|12|15|12|15|0|0	1	1	1	1	1	7.06	0
MG132	C22orf28	C22orf28	116|109|98|74	397	99.25	4	24|5|26|24|29|24|26|21|27|20|34|28|26|24|32|25	1	1	1	1	1	4.02	0
MG132	DIMT1	DIMT1	35|28|28|25	116	29	4	2|0|2|2|5|2|6|1|0|0|5|2|3|0|2|0	1	1	1	1	1	14.5	0
MG132	SLC25A15	SLC25A15	11|7|4|7	29	7.25	4	0|0|0|0|1|1|0|0|0|0|3|2|2|1|0|0	0.99	1	0.99	1	0.99	11.6	0
MG132	SEC11A	SEC11A	35|35|32|32	134	33.5	4	4|5|6|0|0|0|5|1|3|4|0|0|0|2|2|3	1	1	1	1	1	15.31	0
MG132	TMOD3	TMOD3	28|18|25|21	92	23	4	7|4|4|2|4|4|4|5|14|12|9|11|8|8|0|0	0.9	1	0.9	1	0.9	3.83	0.01
MG132	UBL4A	UBL4A	18|11|14|11	54	13.5	4	0|0|0|0|0|0|0|0|0|0|0|0|0|0|0|0	1	1	1	1	1	135	0
MG132	TTC35	TTC35	179|186|182|182	729	182.25	4	3|5|0|0|0|0|0|0|3|5|2|0|0|1|2|2	1	1	1	1	1	126.78	0
MG132	PSMD6	PSMD6	53|60|46|46	205	51.25	4	10|2|2|7|6|2|4|5|7|7|2|5|6|6|4|4	1	1	1	1	1	10.38	0
MG132	EIF4A3	EIF4A3	140|168|161|165	634	158.5	4	33|15|24|22|20|20|23|27|22|22|34|25|32|24|13|7	1	1	1	1	1	6.99	0
MG132	RAB21	RAB21	32|39|39|35	145	36.25	4	11|3|6|5|4|5|3|7|12|12|7|7|6|6|3|1	1	1	1	1	1	5.92	0
MG132	MLEC	MLEC	28|32|21|25	106	26.5	4	10|0|2|0|2|3|0|1|0|0|2|4|8|5|0|2	1	1	1	1	1	10.87	0
MG132	KNTC1	KNTC1	7|11|18|7	43	10.75	4	2|0|2|5|3|4|2|2|2|4|3|3|2|1|0|0	0.95	1	0.95	1	0.95	4.91	0
MG132	LPGAT1	LPGAT1	11|7|7|14	39	9.75	4	1|1|0|0|0|0|2|1|2|0|0|0|0|0|0|0	1	1	1	1	1	22.29	0
MG132	TTC37	TTC37	25|21|11|11	68	17	4	3|0|2|3|1|1|5|4|3|1|3|3|1|0|0|1	1	1	1	1	1	8.77	0
MG132	FAM8A1	FAM8A1	11|7|7|4	29	7.25	4	0|0|0|0|0|0|0|0|0|0|0|0|0|0|0|0	1	1	1	1	1	72.5	0
MG132	HSD17B12	HSD17B12	112|102|112|123	449	112.25	4	18|8|6|4|6|7|7|7|10|11|20|19|19|15|11|12	1	1	1	1	1	9.98	0
MG132	TMEM85	TMEM85	53|49|49|56	207	51.75	4	0|0|0|0|0|0|0|0|0|0|0|0|0|0|0|0	1	1	1	1	1	517.5	0
MG132	TMEM9	TMEM9	11|11|11|7	40	10	4	0|0|0|0|0|0|0|0|0|0|0|0|0|0|0|0	1	1	1	1	1	100	0
MG132	C8orf55	C8orf55	25|21|14|21	81	20.25	4	0|0|1|2|3|1|0|0|0|0|4|3|2|4|0|1	1	1	1	1	1	15.43	0
MG132	NOP58	NOP58	112|112|123|140	487	121.75	4	34|18|17|12|17|18|23|22|17|14|28|24|32|30|14|10	1	1	1	1	1	5.9	0
MG132	DHRS7	DHRS7	63|70|70|46	249	62.25	4	0|0|0|0|0|0|0|0|0|0|0|0|0|0|2|3	1	1	1	1	1	199.2	0
MG132	COPZ1	COPZ1	25|21|25|21	92	23	4	6|5|3|6|5|7|3|5|4|4|4|2|1|6|5|2	1	1	1	1	1	5.41	0
MG132	PPIL1	PPIL1	7|4|11|7	29	7.25	4	0|0|0|0|0|0|0|0|0|0|0|0|0|0|0|0	1	1	1	1	1	72.5	0
MG132	AKAP11	AKAP11	74|56|56|49	235	58.75	4	0|0|0|0|0|0|0|0|0|0|0|0|0|0|0|0	1	1	1	1	1	587.5	0
MG132	SNX9	SNX9	28|35|14|14	91	22.75	4	0|0|0|0|0|0|0|0|0|0|0|0|0|0|0|0	1	1	1	1	1	227.5	0
MG132	XPOT	XPOT	119|140|109|130	498	124.5	4	32|17|20|20|26|30|28|34|23|23|26|30|32|31|6|9	1	1	1	1	1	5.15	0
MG132	ACOT9	ACOT9	60|63|63|63	249	62.25	4	14|9|7|4|7|8|6|2|3|2|8|5|9|7|2|1	1	1	1	1	1	10.6	0
MG132	GTPBP1	GTPBP1	21|21|32|35	109	27.25	4	10|3|2|7|7|2|13|14|9|9|3|5|8|9|7|10	0.87	1	0.87	1	0.87	3.69	0.01
MG132	STAU1	STAU1	28|32|28|25	113	28.25	4	9|5|6|8|4|7|13|13|9|9|11|7|10|10|3|5	1	1	1	1	1	3.5	0
MG132	UBR4	UBR4	39|28|35|28	130	32.5	4	10|10|3|0|2|4|2|0|1|0|1|3|2|1|0|0	1	1	1	1	1	13.33	0
MG132	CYB5B	CYB5B	18|21|18|28	85	21.25	4	3|2|1|0|0|0|0|0|0|0|1|0|0|0|1|0	1	1	1	1	1	42.5	0
MG132	STX18	STX18	42|49|49|49	189	47.25	4	3|1|0|2|0|0|3|2|2|2|0|0|1|1|0|0	1	1	1	1	1	44.47	0
MG132	FAM91A1	FAM91A1	28|39|28|39	134	33.5	4	6|3|6|6|5|7|11|6|17|14|10|9|6|4|8|6	1	1	1	1	1	4.32	0
MG132	PRR11	PRR11	7|11|18|14	50	12.5	4	0|0|0|0|0|0|0|0|0|0|0|0|0|0|0|0	1	1	1	1	1	125	0
MG132	C3orf75	C3orf75	21|21|11|18	71	17.75	4	0|0|0|0|0|0|0|0|0|0|0|0|0|0|0|0	1	1	1	1	1	177.5	0
MG132	ASF1B	ASF1B	35|21|42|42	140	35	4	3|1|0|0|0|0|5|8|6|8|0|0|0|0|2|4	1	1	1	1	1	15.14	0
MG132	AGK	AGK	32|32|35|25	124	31	4	8|2|9|7|8|8|4|5|0|1|1|1|4|6|3|5	1	1	1	1	1	6.89	0
MG132	CHCHD3	CHCHD3	7|11|11|14	43	10.75	4	1|0|0|0|0|0|1|0|0|0|1|1|1|1|0|0	1	1	1	1	1	28.67	0
MG132	TMEM160	TMEM160	14|11|4|11	40	10	4	0|0|0|0|0|0|0|0|0|0|0|0|0|0|0|0	1	1	1	1	1	100	0
MG132	TMEM111	TMEM111	200|203|231|186	820	205	4	3|1|0|0|0|0|1|0|7|4|1|0|0|1|2|1	1	1	1	1	1	156.19	0
MG132	LANCL2	LANCL2	7|4|11|11	33	8.25	4	0|0|0|0|1|1|0|0|0|0|1|1|1|0|2|0	1	1	1	1	1	18.86	0
MG132	H2AFY2	H2AFY2	28|28|60|35	151	37.75	4	16|0|0|0|9|0|17|0|0|0|0|0|0|0|0|0	0.99	1	0.99	1	0.99	14.38	0
MG132	USE1	USE1	21|21|21|11	74	18.5	4	0|0|0|0|0|0|0|0|0|0|0|0|0|0|0|0	1	1	1	1	1	185	0
MG132	DLD	DLD	46|46|46|63	201	50.25	4	14|12|11|6|15|8|7|9|8|11|15|19|21|25|4|6	1	1	1	1	1	4.21	0
MG132	MYO6	MYO6	49|74|60|88	271	67.75	4	10|2|9|9|9|9|1|0|15|10|14|13|15|13|0|4	1	1	1	1	1	8.15	0
MG132	CDKAL1	CDKAL1	98|112|84|102	396	99	4	6|1|2|0|1|2|4|3|9|6|0|0|0|0|5|6	1	1	1	1	1	35.2	0
MG132	FLOT2	FLOT2	28|21|32|14	95	23.75	4	5|0|2|1|1|3|4|4|8|5|1|1|0|1|3|4	1	1	1	1	1	8.84	0
MG132	IARS	IARS	161|168|168|168	665	166.25	4	43|18|62|48|43|43|49|54|30|33|49|59|43|58|15|26	1	1	1	1	1	3.95	0
MG132	VAPA	VAPA	140|140|151|154	585	146.25	4	23|9|5|12|2|4|6|12|12|9|10|12|8|8|12|9	1	1	1	1	1	15.29	0
MG132	CNP	CNP	28|14|18|28	88	22	4	4|0|4|5|2|0|1|1|2|0|0|3|2|4|3|0	1	1	1	1	1	11.35	0
MG132	EFTUD1	EFTUD1	11|18|18|18	65	16.25	4	0|0|0|0|0|0|0|0|0|0|0|0|0|0|0|0	1	1	1	1	1	162.5	0
MG132	MIS18A	MIS18A	14|14|18|11	57	14.25	4	0|0|0|0|0|0|0|0|0|0|0|0|0|0|0|0	1	1	1	1	1	142.5	0
MG132	UGGT1	UGGT1	11|14|18|11	54	13.5	4	0|0|0|0|0|0|0|0|0|0|0|0|0|0|0|0	1	1	1	1	1	135	0
MG132	C15orf24	C15orf24	123|126|126|105	480	120	4	1|0|0|0|0|0|0|0|0|0|0|0|0|0|0|0	1	1	1	1	1	1200	0
MG132	TOMM22	TOMM22	95|84|84|84	347	86.75	4	39|19|12|24|38|33|22|15|19|26|22|18|23|24|19|27	1	1	1	1	1	3.65	0
MG132	LZTFL1	LZTFL1	7|4|7|4	22	5.5	4	0|0|0|0|0|0|0|0|0|0|0|0|0|0|0|0	1	1	1	1	1	55	0
MG132	DDX24	DDX24	25|21|18|21	85	21.25	4	9|6|5|6|3|4|1|1|0|0|5|4|6|5|0|0	1	1	1	1	1	6.18	0
MG132	C12orf5	C12orf5	14|21|18|14	67	16.75	4	2|2|5|3|5|5|5|3|3|4|0|0|2|3|0|0	1	1	1	1	1	6.38	0
MG132	NUP107	NUP107	60|42|46|53	201	50.25	4	12|6|8|10|6|4|4|3|3|9|14|14|14|20|1|4	1	1	1	1	1	6.09	0
MG132	SMPD4	SMPD4	182|189|168|175	714	178.5	4	0|0|0|0|0|0|1|0|0|0|0|0|0|0|2|0	1	1	1	1	1	952	0
MG132	NAA10	NAA10	14|14|21|21	70	17.5	4	3|0|8|2|4|5|3|1|7|6|3|3|6|4|3|3	1	1	1	1	1	4.59	0
MG132	NMT1	NMT1	116|112|102|95	425	106.25	4	28|18|15|14|8|13|35|33|42|34|23|25|25|26|23|31	1	1	1	1	1	4.33	0
MG132	PPIA	PPIA	126|105|133|137	501	125.25	4	9|1|13|9|13|13|14|14|14|16|14|10|15|11|6|8	1	1	1	1	1	11.13	0
MG132	CEP170	CEP170	91|77|84|81	333	83.25	4	0|0|0|0|0|0|0|0|0|0|0|0|0|0|0|0	1	1	1	1	1	832.5	0
MG132	MST4	MST4	46|42|35|49	172	43	4	1|1|1|1|5|7|2|1|2|5|4|5|4|3|1|0	1	1	1	1	1	16	0
MG132	SRP72	SRP72	53|63|74|84	274	68.5	4	18|12|19|8|13|11|23|20|13|12|14|15|14|12|3|6	1	1	1	1	1	5.15	0
MG132	DIAPH3	DIAPH3	11|11|11|7	40	10	4	0|0|0|0|0|0|0|0|0|0|0|0|0|0|0|0	1	1	1	1	1	100	0
MG132	SUN1	SUN1	42|49|35|39	165	41.25	4	0|0|0|0|0|0|0|0|0|0|0|0|0|0|0|0	1	1	1	1	1	412.5	0
MG132	UBB	UBB	165|161|147|179	652	163	4	0|0|0|0|0|0|0|0|0|0|0|0|0|0|0|0	1	1	1	1	1	1630	0
MG132	SEC24B	SEC24B	28|28|21|32	109	27.25	4	8|4|4|3|3|4|2|0|3|2|2|4|2|0|8|5	1	1	1	1	1	8.07	0
MG132	SEC24A	SEC24A	21|21|28|18	88	22	4	6|4|8|7|6|7|5|3|6|4|8|4|3|8|0|3	1	1	1	1	1	4.29	0
MG132	TP53BP2	TP53BP2	25|25|32|35	117	29.25	4	0|0|0|0|0|0|0|0|0|0|0|0|0|0|0|0	1	1	1	1	1	292.5	0
MG132	PFKP	PFKP	74|81|102|98	355	88.75	4	29|5|17|17|19|16|13|14|21|20|27|27|26|24|19|15	1	1	1	1	1	4.6	0
MG132	TPM3	TPM3	14|21|14|25	74	18.5	4	3|0|0|0|4|0|0|0|5|7|0|0|0|0|2|3	1	1	1	1	1	12.33	0
MG132	CLCC1	CLCC1	53|42|46|49	190	47.5	4	1|1|0|0|0|0|0|0|0|0|3|2|5|2|0|0	1	1	1	1	1	54.29	0
MG132	FLNC	FLNC	7|14|14|11	46	11.5	4	0|0|0|0|0|0|0|0|0|0|0|0|0|0|0|0	1	1	1	1	1	115	0
MG132	LUC7L2	LUC7L2	21|18|25|18	82	20.5	4	9|1|6|3|5|6|8|7|6|6|2|4|2|3|4|1	1	1	1	1	1	4.49	0
MG132	HNRNPC	HNRNPC	102|98|98|102	400	100	4	32|0|25|21|23|18|36|47|21|26|22|25|23|27|25|23	1	1	1	1	1	4.06	0
MG132	ST7	ST7	32|21|25|21	99	24.75	4	0|0|0|0|0|0|0|0|0|0|0|0|0|0|0|2	1	1	1	1	1	198	0
MG132	GNAS	GNAS	53|42|67|56	218	54.5	4	7|0|2|3|5|4|5|5|5|3|3|5|6|7|10|6	1	1	1	1	1	11.47	0
MG132	GNAI2	GNAI2	11|7|7|7	32	8	4	0|0|0|0|0|0|0|0|0|0|0|0|0|0|0|0	1	1	1	1	1	80	0
MG132	OCIAD1	OCIAD1	63|67|63|56	249	62.25	4	4|4|0|1|1|0|10|5|10|13|1|1|0|1|8|7	1	1	1	1	1	15.09	0
MG132	PCCB	PCCB	2191|2027|1946|1932	8096	2024	4	333|185|695|684|510|480|88|98|128|118|838|852|735|816|92|83	0.9	1	0.9	1	0.9	4.81	0.01
MG132	ANAPC1	ANAPC1	11|14|14|11	50	12.5	4	0|0|0|0|0|0|0|0|0|0|0|0|0|0|0|0	1	1	1	1	1	125	0
MG132	MYH9	MYH9	249|277|245|256	1027	256.75	4	29|11|28|26|28|10|22|24|46|50|10|14|18|10|11|19	1	1	1	1	1	11.54	0
[truncated: 2,042 more rows]
